# Supplementary material for: HMMR acts in the PLK1-dependent spindle positioning pathway and supports neural development
Source: eLife. 2017 Oct 10;6:e28672. doi: 10.7554/eLife.28672 (PMC5681225; doi:10.7554/eLife.28672)
Supplement: Figure 6—source data 1. [file elife-28672-fig6-data1.xlsx]

## Sheet: Proteins
Proteins
Checked	Protein FDR Confidence	Master	Accession	Description	Contaminant	Exp. q-value	Sum PEP Score	Coverage	# Peptides	# PSMs	# Unique Peptides	# Protein Groups	# AAs	MW [kDa]	calc. pI	Found in Sample: [S1] F1: Light, Control	Found in Sample: [S3] F1: Heavy, Sample	Found in Sample: [S2] F2: Light, Control	Found in Sample: [S4] F2: Heavy, Sample	Modifications	Entrez Gene ID	Ensembl Gene ID	Gene ID	Chromosome	Biological Process	Cellular Component	Molecular Function	Pfam IDs	Abundance Ratio: (F1, Heavy) / (F1, Light)	Abundance Ratio: (F2, Heavy) / (F2, Light)	Abundance Ratio (log2): (F1, Heavy) / (F1, Light)	Abundance Ratio (log2): (F2, Heavy) / (F2, Light)	Abundance: F1: Light, Control	Abundance: F1: Heavy, Sample	Abundance: F2: Light, Control	Abundance: F2: Heavy, Sample	Abundances Count: F1: Light, Control	Abundances Count: F1: Heavy, Sample	Abundances Count: F2: Light, Control	Abundances Count: F2: Heavy, Sample	emPAI	# Razor Peptides	Score Sequest HT	# Peptides Sequest HT
FALSE	High	IsMasterProtein	P35579	Myosin-9 OS=Homo sapiens GN=MYH9 PE=1 SV=4	FALSE	0	1015.3	65.6633	164	548	143	1	1960	226.4	5.6	High	High	High	High	Dimethyl [K29; K38; K199; K261; K289; K355; K576; K606; K613; K637; K682; K975; K989; K1014; K1016; K1145; K1295; K1370; K1445; K1454; K1513; K1518; K1566; K1669; K1716; K1754; K1793; K1802; K1815; K1828; K1845]	4627	ENSG00000100345.20	MYH9	22	cell differentiation;cell organization and biogenesis;cellular component movement;metabolic process;regulation of biological process;response to stimulus;transport	cytoplasm;cytoskeleton;cytosol;extracellular;membrane;nucleus	catalytic activity;motor activity;nucleotide binding;protein binding;RNA binding;transporter activity	Pf00063, Pf01442, Pf01496, Pf01576, Pf01765, Pf02736, Pf03962, Pf04111, Pf04156, Pf05911, Pf06637, Pf07888, Pf09731, Pf11068, Pf11559, Pf12128, Pf13094	42.779	12.294	5.42	3.62	8.32201e+08	3.56006e+10	3.59191e+08	4.41593e+09	110	159	66	96	125.117	22	889.87	164
FALSE	High	IsMasterProtein	CON_P02769	SWISS-PROT P02769 (Bos taurus) Bovine serum albumin precursor	TRUE	0	642.106	73.4761	57	540	53	1	607	69.2	6.18	High	High	High	High	Dimethyl [K36; K44; K65; K75; K88; K100; K130; K138; K140; K151; K155; K156; K183; K197; K204; K256; K263; K266; K285; K297; K299; K304; K309; K318; K336; K340; K386; K399; K401; K412; K437; K523; K544; K548; K557; K580; K587; K597]									1.759	0.873	0.81	-0.2	1.53774e+10	2.70483e+10	4.77741e+10	4.17111e+10	56	55	70	68	2796.75	5	897.56	57
FALSE	High	IsMasterProtein	P60709	Actin, cytoplasmic 1 OS=Homo sapiens GN=ACTB PE=1 SV=1	TRUE	0	368.916	80.8	25	297	14	1	375	41.7	5.48	High	High	High	High	Dimethyl [K50; K61; K113; K191; K215; K238; K284; K291; K315; K326; K373]	60	ENSG00000075624.13	ACTB	7	cell organization and biogenesis;cellular component movement;metabolic process;regulation of biological process;response to stimulus	cytoplasm;cytoskeleton;cytosol;membrane	DNA binding;nucleotide binding;protein binding;structural molecule activity	Pf00022	2.155	1.04	1.11	0.06	1.09142e+10	2.35232e+10	8.0178e+09	8.33884e+09	35	34	29	29	3673.66	19	458.41	25
FALSE	High	IsMasterProtein	P38646	Stress-70 protein, mitochondrial OS=Homo sapiens GN=HSPA9 PE=1 SV=2	FALSE	0	359.461	63.4757	33	155	33	1	679	73.6	6.16	High	High	High	High	Dimethyl [K73; K121; K159; K173; K175; K187; K234; K238; K259; K316; K340; K456; K468; K485; K555; K563; K595; K600; K610; K646; K653]	3313	ENSG00000113013.12	HSPA9	5	cell differentiation;cell organization and biogenesis;metabolic process;regulation of biological process;transport	cytoplasm;mitochondrion;nucleus	nucleotide binding;protein binding;RNA binding	Pf00012, Pf06723	0.53	0.826	-0.92	-0.27	2.6499e+09	1.40466e+09	1.93646e+09	1.60046e+09	34	34	32	31	80.113	0	286.83	33
FALSE	High	IsMasterProtein	P11142	Heat shock cognate 71 kDa protein OS=Homo sapiens GN=HSPA8 PE=1 SV=1	FALSE	0	240.16	56.0372	28	109	25	1	646	70.9	5.52	High	High	High	High	Dimethyl [K25; K71; K102; K126; K128; K137; K187; K188; K220; K246; K319; K328; K357; K384; K550; K609]	3312	ENSG00000109971.13	HSPA8	11	cell communication;cell organization and biogenesis;metabolic process;regulation of biological process;response to stimulus;transport	cytoplasm;cytosol;endosome;extracellular;membrane;nucleus;organelle lumen;spliceosomal complex	catalytic activity;nucleotide binding;protein binding;RNA binding	Pf00012, Pf02463, Pf06723	0.511	0.659	-0.97	-0.6	1.61688e+09	8.26803e+08	9.98503e+08	6.57574e+08	24	24	23	23	33.551	3	167.11	28
FALSE	High	IsMasterProtein	CON_ENSEMBL	ENSBTAP00000024466 (Bos taurus) 44 kDa protein	TRUE	0	221.591	63.8404	17	104	3	1	401	43.9	5.35	High	High	High	High	Dimethyl [K17; K46; K91; K156; K172; K199; K202; K204; K222; K242; K274; K293; K323]									0.55	0.712	-0.86	-0.49	3.66188e+08	2.01549e+08	2.5266e+08	1.79857e+08	3	3	3	3	126.427	0	225.04	17
FALSE	High	IsMasterProtein	P35580-4	Isoform 4 of Myosin-10 OS=Homo sapiens GN=MYH10	FALSE	0	218.187	32.0379	54	108	33	1	2007	232.4	5.55	Peak Found	High	Peak Found	High	Dimethyl [K593; K720; K1483; K1492]	4628	ENSG00000133026.12	MYH10	17	cell organization and biogenesis;cell proliferation;cellular component movement;metabolic process;regulation of biological process;transport	cytoplasm;cytosol;membrane;nucleus	catalytic activity;motor activity;nucleotide binding;protein binding;transporter activity	Pf00063, Pf00769, Pf01496, Pf01576, Pf02736, Pf04111, Pf05622, Pf05911, Pf06637, Pf07888, Pf09726, Pf12128, Pf13094, Pf13514	35.398	4.811	5.15	2.27	4.89661e+06	1.7333e+08	1.39465e+06	6.7097e+06	9	28	2	4	2.335	0	137.14	54
FALSE	High	IsMasterProtein	P31327-3	Isoform 3 of Carbamoyl-phosphate synthase [ammonia], mitochondrial OS=Homo sapiens GN=CPS1	FALSE	0	217.217	43.6919	46	79	45	1	1506	165.5	6.79	High	High	High	High	Dimethyl [K61; K96; K125; K144; K163; K203; K213; K259; K293; K313; K334; K483; K503; K528; K559; K566; K581; K618; K746; K757; K778; K817; K847; K875; K895; K911; K1106; K1126; K1174; K1253; K1275; K1287; K1315; K1354; K1393; K1477; K1485]	1373	ENSG00000021826.14	CPS1	2	cell differentiation;metabolic process;response to stimulus	membrane;organelle lumen	catalytic activity;metal ion binding;nucleotide binding;protein binding	Pf00117, Pf00289, Pf00988, Pf02142, Pf02222, Pf02786, Pf02787, Pf07478, Pf13535, Pf15632	0.147	0.049	-2.77	-4.34	8.36938e+08	1.22692e+08	3.35227e+08	1.65266e+07	36	26	25	16	2.863	1	108.87	46
FALSE	High	IsMasterProtein	P07437	Tubulin beta chain OS=Homo sapiens GN=TUBB PE=1 SV=2	FALSE	0	203.039	64.6396	23	93	5	1	444	49.6	4.89	High	High	High	High	Dimethyl [K19; K58; K103; K122; K154; K174; K252; K297; K350; K379]	203068	ENSG00000232575.10; ENSG00000196230.12; ENSG00000227739.10; ENSG00000224156.10; ENSG00000235067.10; ENSG00000229684.10; ENSG00000183311.16; ENSG00000232421.10	TUBB	6; CHR_HSCHR6_MHC_MANN_CTG1; CHR_HSCHR6_MHC_COX_CTG1; CHR_HSCHR6_MHC_APD_CTG1; CHR_HSCHR6_MHC_DBB_CTG1; CHR_HSCHR6_MHC_MCF_CTG1; CHR_HSCHR6_MHC_QBL_CTG1; CHR_HSCHR6_MHC_SSTO_CTG1	cell division;cell organization and biogenesis;cellular component movement;defense response;response to stimulus;transport	cytoplasm;cytoskeleton;extracellular;nucleus;organelle lumen	catalytic activity;nucleotide binding;protein binding;structural molecule activity	Pf00091, Pf03953, Pf10644	0.114	0.102	-3.13	-3.3	9.20288e+08	1.048e+08	4.86458e+08	4.95108e+07	8	6	6	6	99	3	157.57	23
FALSE	High	IsMasterProtein	P68371	Tubulin beta-4B chain OS=Homo sapiens GN=TUBB4B PE=1 SV=1	FALSE	0	193.513	64.4944	23	82	3	1	445	49.8	4.89	High	High	High	High	Dimethyl [K19; K58; K103; K122; K154; K174; K252; K297; K350; K379]	10383	ENSG00000188229.5	TUBB4B	9	cell organization and biogenesis;cellular component movement;defense response;response to stimulus;transport	cytoplasm;cytoskeleton;cytosol;extracellular;nucleus;organelle lumen	catalytic activity;nucleotide binding;protein binding;RNA binding;structural molecule activity	Pf00091, Pf03953, Pf10644	0.099	0.095	-3.33	-3.39	2.8813e+09	2.85863e+08	1.73861e+09	1.65835e+08	23	20	20	17	66.002	25	153.79	23
FALSE	High	IsMasterProtein	CON_ENSEMBL	ENSBTAP00000024462 (Bos taurus) 47 kDa protein	TRUE	0	189.302	65.3938	18	99	4	1	419	46.5	6.33	High	High	High	High	Dimethyl [K91; K114; K119; K244; K260; K287; K290; K292; K310; K330; K362; K381; K544; K544; K586; K586; K586; K586; K586; K586]									0.637	0.844	-0.65	-0.24	2.19616e+09	1.39789e+09	2.3086e+09	1.94903e+09	19	18	19	18	43.893	21	204.88	18
FALSE	High	IsMasterProtein	Q9NYL9	Tropomodulin-3 OS=Homo sapiens GN=TMOD3 PE=1 SV=1	FALSE	0	185.257	72.1591	20	54	20	1	352	39.6	5.19	High	High	High	High	Dimethyl [K13; K30; K75; K93; K103; K112; K148; K191; K217; K252; K289; K307; K317]	29766	ENSG00000138594.13	TMOD3	15	cell organization and biogenesis;regulation of biological process	cytoplasm;cytoskeleton	protein binding	Pf03250	2.633	2.634	1.4	1.4	3.62275e+08	9.54019e+08	7.33136e+07	1.93091e+08	16	19	10	11	45.416	0	109.06	20
FALSE	High	IsMasterProtein	P11021	78 kDa glucose-regulated protein OS=Homo sapiens GN=HSPA5 PE=1 SV=2	FALSE	0	177.571	45.7187	25	91	23	1	654	72.3	5.16	High	High	High	High	Dimethyl [K96; K113; K125; K138; K152; K154; K163; K213; K326; K353; K464; K573; K617; K620; K621; K633; K651]	3309	ENSG00000044574.7	HSPA5	9	cell communication;cell death;cell differentiation;cell organization and biogenesis;metabolic process;regulation of biological process;response to stimulus;transport	cell surface;cytoplasm;endoplasmic reticulum;membrane;mitochondrion;nucleus;organelle lumen	catalytic activity;metal ion binding;nucleotide binding;protein binding	Pf00012, Pf01968, Pf06723	0.82	0.815	-0.29	-0.3	5.38413e+08	4.41556e+08	2.75195e+08	2.24232e+08	23	23	17	18	17.548	0	104.83	25
FALSE	High	IsMasterProtein	P08670	Vimentin OS=Homo sapiens GN=VIM PE=1 SV=4	FALSE	0	172.984	66.7382	30	74	29	1	466	53.6	5.12	High	High	High	High	Dimethyl [K97; K104; K120; K129; K139; K143; K188; K223; K235; K292; K334; K373; K390; K402; K439]	7431	ENSG00000026025.15	VIM	10	cell differentiation;cell organization and biogenesis;cellular component movement;metabolic process;regulation of biological process;response to stimulus	cytoplasm;cytoskeleton;cytosol;membrane	protein binding;RNA binding;structural molecule activity	Pf00038, Pf04111, Pf04156, Pf04732, Pf05622, Pf10186	0.792	0.326	-0.34	-1.62	6.06105e+08	4.79882e+08	1.1948e+09	3.89012e+08	18	18	28	27	30.623	0	77.53	30
FALSE	High	IsMasterProtein	P05787-2	Isoform 2 of Keratin, type II cytoskeletal 8 OS=Homo sapiens GN=KRT8	TRUE	0	172.052	64.9706	30	79	27	1	511	56.6	5.43	High	High	High	High	Dimethyl [K145; K158; K186; K188; K204; K225; K226; K235; K292; K313; K323; K332; K353; K375; K380; K409; K421; K442; K511]	3856	ENSG00000170421.12	KRT8	12	cell death;cell differentiation;cell organization and biogenesis;regulation of biological process;response to stimulus	cytoplasm;cytoskeleton;cytosol;membrane;nucleus	catalytic activity;motor activity;protein binding;structural molecule activity	Pf00038, Pf01576, Pf06637, Pf13166, Pf13514, Pf15003	0.167	0.119	-2.58	-3.07	1.59825e+09	2.67175e+08	1.39195e+09	1.66078e+08	25	23	27	23	24.119	4	105.61	30
FALSE	High	IsMasterProtein	Q9BQE3	Tubulin alpha-1C chain OS=Homo sapiens GN=TUBA1C PE=1 SV=1	FALSE	0	160.214	55.4566	16	72	7	1	449	49.9	5.1	High	High	High	High	Dimethyl [K60; K96; K280; K336; K352; K370]	84790	ENSG00000167553.15	TUBA1C	12	cell division;cell organization and biogenesis;transport	cytoplasm;cytoskeleton;nucleus	catalytic activity;nucleotide binding;protein binding;structural molecule activity	Pf00091, Pf03953	0.113	0.098	-3.15	-3.35	2.22947e+09	2.51017e+08	1.20338e+09	1.17678e+08	17	16	13	12	27.73	12	143.52	16
FALSE	High	IsMasterProtein	P0DMV9	Heat shock 70 kDa protein 1B OS=Homo sapiens GN=HSPA1B PE=1 SV=1	FALSE	0	157.326	41.8097	21	66	19	1	641	70	5.66	High	High	High	High	Dimethyl [K71; K88; K100; K102; K126; K128; K384; K550; K589; K595]	3304; 3303	ENSG00000232804.5; ENSG00000234475.5; ENSG00000231555.4; ENSG00000235941.5; ENSG00000204389.9; ENSG00000204388.6; ENSG00000212866.6; ENSG00000237724.5; ENSG00000224501.5	HSPA1B; HSPA1A	6; CHR_HSCHR6_MHC_APD_CTG1; CHR_HSCHR6_MHC_DBB_CTG1; CHR_HSCHR6_MHC_QBL_CTG1; CHR_HSCHR6_MHC_COX_CTG1	cell organization and biogenesis;metabolic process;regulation of biological process;response to stimulus;transport	cytoplasm;cytoskeleton;cytosol;extracellular;mitochondrion;nucleus	catalytic activity;nucleotide binding;protein binding;receptor activity	Pf00012, Pf06723	0.499	0.61	-1	-0.71	3.61452e+08	1.80543e+08	3.16062e+08	1.92897e+08	16	15	18	17	10.994	0	104.62	21
FALSE	High	IsMasterProtein	Q9UHB6-4	Isoform 4 of LIM domain and actin-binding protein 1 OS=Homo sapiens GN=LIMA1	FALSE	0	156.676	42.2368	25	81	25	1	760	85.2	6.76	High	High	High	High	Dimethyl [K40; K75; K324; K360; K501; K512; K551; K565; K577; K578; K604; K739; K748]	51474	ENSG00000050405.13	LIMA1	12	cell organization and biogenesis;regulation of biological process	cytoplasm;cytoskeleton	metal ion binding;protein binding	Pf00412	2.187	0.927	1.13	-0.11	5.73522e+08	1.25429e+09	4.62134e+08	4.28463e+08	25	26	15	18	4.456	0	98.22	25
FALSE	High	IsMasterProtein	Q13885	Tubulin beta-2A chain OS=Homo sapiens GN=TUBB2A PE=1 SV=1	FALSE	0	156.446	49.2135	18	67	1	1	445	49.9	4.89	High	Not Found	Not Found	Not Found	Dimethyl [K19; K103; K122; K174; K252; K350; K379]	7280	ENSG00000137267.5	TUBB2A	6	cell organization and biogenesis	cytoplasm;cytoskeleton;nucleus	catalytic activity;nucleotide binding;protein binding;structural molecule activity	Pf00091, Pf03953, Pf10644	0.01		-6.64		1.60362e+06				2				29.079	1	130.75	18
FALSE	High	IsMasterProtein	P68104	Elongation factor 1-alpha 1 OS=Homo sapiens GN=EEF1A1 PE=1 SV=1	FALSE	0	140.812	53.2468	18	60	18	1	462	50.1	9.01	High	High	High	High	Dimethyl [K20; K30; K55; K62; K129; K146; K154; K179; K180; K212; K219; K244; K255; K273; K290; K408; K439]	1915	ENSG00000156508.17	EEF1A1	6	metabolic process;regulation of biological process;response to stimulus;transport	cytoplasm;cytoskeleton;cytosol;extracellular;membrane;nucleus;organelle lumen	catalytic activity;nucleotide binding;protein binding;RNA binding	Pf00009, Pf03143, Pf03144	0.26	0.257	-1.94	-1.96	1.55517e+09	4.04988e+08	1.31694e+09	3.37852e+08	18	16	14	13	19.893	0	113.07	18
FALSE	High	IsMasterProtein	P68032	Actin, alpha cardiac muscle 1 OS=Homo sapiens GN=ACTC1 PE=1 SV=1	FALSE	0	137.867	43.2361	15	217	1	1	377	42	5.39	Peak Found	High	Peak Found	High	Dimethyl [K52; K63; K86; K193; K240; K317; K328]	70	ENSG00000159251.6	ACTC1	15	cell death;cell organization and biogenesis;cellular component movement;regulation of biological process;response to stimulus	cytoplasm;cytoskeleton;cytosol;membrane	catalytic activity;nucleotide binding;protein binding	Pf00022	1.922	0.789	0.94	-0.34	6.2424e+07	1.19983e+08	9.00864e+08	710939617	4	3	4	4	80.855	5	222.35	15
FALSE	High	IsMasterProtein	P68366	Tubulin alpha-4A chain OS=Homo sapiens GN=TUBA4A PE=1 SV=1	FALSE	0	135.78	49.7768	15	64	6	1	448	49.9	5.06	High	High	High	Peak Found	Dimethyl [K60; K96; K280; K304; K352; K370]	7277	ENSG00000127824.13	TUBA4A	2	cell organization and biogenesis;transport	cytoplasm;cytoskeleton;cytosol;extracellular	catalytic activity;nucleotide binding;protein binding;structural molecule activity	Pf00091, Pf03953	0.103	0.097	-3.28	-3.36	2.50731e+08	2.57815e+07	1.79861e+08	1.75325e+07	5	5	6	6	12.335	0	125.99	15
FALSE	High	IsMasterProtein	CON_P00761	SWISS-PROT P00761|TRYP_PIG Trypsin - Sus scrofa (Pig).	TRUE	0	134.52	69.2641	11	57	11	1	231	24.4	7.18	High	High	High	High	Dimethyl [K51; K77; K97; K133; K147; K157; K210; K216]									0.113	0.341	-3.15	-1.55	1.37293e+09	1.54833e+08	3.88023e+09	1.32452e+09	9	7	13	11	118.378	0	131.27	11
FALSE	High	IsMasterProtein	P62736	Actin, aortic smooth muscle OS=Homo sapiens GN=ACTA2 PE=1 SV=1	FALSE	0	133.153	43.2361	14	205	1	1	377	42	5.39	Not Found	Not Found	High	Not Found	Dimethyl [K52; K63; K86; K193; K240; K317; K328]	59	ENSG00000107796.13	ACTA2	10	regulation of biological process;response to stimulus	cytoplasm;cytoskeleton;cytosol	nucleotide binding;protein binding	Pf00022													66.002	0	217.88	14
FALSE	High	IsMasterProtein	P28799	Granulins OS=Homo sapiens GN=GRN PE=1 SV=2	FALSE	0	131.813	36.425	15	65	15	1	593	63.5	6.83	High	High	High	High	Dimethyl [K189; K273; K332; K347; K361; K428; K497]	2896	ENSG00000030582.17	GRN	17	regulation of biological process;response to stimulus;transport	endoplasmic reticulum;endosome;extracellular;organelle lumen;vacuole	protein binding;RNA binding	Pf00396	0.609	0.797	-0.71	-0.33	1.62548e+09	9.90376e+08	9.55558e+08	7.61679e+08	13	13	14	14	12.895	0	102.33	15
FALSE	High	IsMasterProtein	P19105	Myosin regulatory light chain 12A OS=Homo sapiens GN=MYL12A PE=1 SV=2	FALSE	0	124.743	80.7018	13	110	1	1	171	19.8	4.81	Not Found	High	Not Found	Not Found	Dimethyl [K34; K50; K62; K150]	10627	ENSG00000101608.12	MYL12A	18	regulation of biological process;response to stimulus	cytosol	metal ion binding;protein binding	Pf00036, Pf13202, Pf13405, Pf13833	100		6.64			367643				1			999	0	188.72	13
FALSE	High	IsMasterProtein	O14950	Myosin regulatory light chain 12B OS=Homo sapiens GN=MYL12B PE=1 SV=2	FALSE	0	121.243	80.2326	13	107	1	1	172	19.8	4.84	Not Found	Not Found	Not Found	Not Found	Dimethyl [K35; K51; K63; K151]	103910	ENSG00000118680.12	MYL12B	18	regulation of biological process	cytosol	metal ion binding;protein binding	Pf00036, Pf13202, Pf13405, Pf13833	8.862	8.666	3.15	3.12	1.04553e+09	9.2653e+09	8.24999e+07	7.14913e+08	15	16	7	7	810.131	16	189.52	13
FALSE	High	IsMasterProtein	P19338	Nucleolin OS=Homo sapiens GN=NCL PE=1 SV=3	FALSE	0	120.134	30.8451	20	59	20	1	710	76.6	4.7	High	High	High	High	Dimethyl [K318; K333; K348; K362; K370; K410; K429; K437; K467; K508; K523; K537; K589; K624; K639; K646; K648]	4691	ENSG00000115053.15	NCL	2	regulation of biological process;response to stimulus	cytoplasm;membrane;nucleus	DNA binding;nucleotide binding;protein binding;RNA binding	Pf00076, Pf13893, Pf14259	0.81	2.285	-0.3	1.19	5.36654e+08	4.34798e+08	3.11769e+08	7.12528e+08	17	17	18	18	3.87	0	104.39	20
FALSE	High	IsMasterProtein	P62158	Calmodulin OS=Homo sapiens GN=CALM1 PE=1 SV=2	FALSE	0	116.394	71.8121	8	49	8	1	149	16.8	4.22	High	High	High	High	Dimethyl [K22; K31; K78; K95; K149]	808; 805; 801	ENSG00000160014.16; ENSG00000143933.16; ENSG00000198668.10	CALM3; CALM2; CALM1	19; 2; 14	metabolic process;regulation of biological process;response to stimulus;transport	cytoplasm;cytoskeleton;cytosol;extracellular;membrane;nucleus	catalytic activity;enzyme regulator activity;metal ion binding;protein binding;transporter activity	Pf00036, Pf08726, Pf12763, Pf13202, Pf13405, Pf13499, Pf13833, Pf14658	0.456	1.751	-1.13	0.81	4.57742e+09	2.08767e+09	125149210	2.19136e+08	10	9	3	3	124.893	0	112.46	8
FALSE	High	IsMasterProtein	P05783	Keratin, type I cytoskeletal 18 OS=Homo sapiens GN=KRT18 PE=1 SV=2	FALSE	0	113.509	55.1163	15	43	15	1	430	48	5.45	High	High	High	High	Dimethyl [K81; K167; K207; K214; K222; K241; K370; K372; K407]	3875	ENSG00000111057.10	KRT18	12	cell death;cell organization and biogenesis;regulation of biological process;response to stimulus;transport	cytoplasm;cytosol;nucleus	protein binding;RNA binding;structural molecule activity	Pf00038	0.136	0.111	-2.88	-3.17	7.85411e+08	1.06612e+08	7.09928e+08	7.90698e+07	15	13	13	13	7.577	0	67.17	15
FALSE	High	IsMasterProtein	P35637	RNA-binding protein FUS OS=Homo sapiens GN=FUS PE=1 SV=1	FALSE	0	113.282	23.0038	11	36	9	1	526	53.4	9.36	High	High	Peak Found	High	Dimethyl [K306; K316; K332; K334; K348; K357; K365; K451]	2521	ENSG00000089280.18	FUS	16	metabolic process;regulation of biological process;response to stimulus	cytoplasm;nucleus	DNA binding;metal ion binding;nucleotide binding;protein binding;RNA binding	Pf00076, Pf00641, Pf13893, Pf14259	0.28	1.074	-1.83	0.1	2.9699e+09	8.32782e+08	1.20021e+07	1.28871e+07	17	16	2	2	30.623	3	60.31	11
FALSE	High	IsMasterProtein	P15924	Desmoplakin OS=Homo sapiens GN=DSP PE=1 SV=3	FALSE	0	112.533	15.465	30	45	30	1	2871	331.6	6.81	High	Peak Found	High	High	Dimethyl [K94; K260; K727; K1022; K1064; K1363; K1374; K1626; K1676; K2145; K2356; K2413; K2430; K2435; K2447; K2494; K2564; K2702]	1832	ENSG00000096696.13	DSP	6	cell death;cell differentiation;cell organization and biogenesis;metabolic process;regulation of biological process;response to stimulus;transport	cytoplasm;cytoskeleton;membrane;nucleus	catalytic activity;motor activity;protein binding;RNA binding;structural molecule activity	Pf00038, Pf00681, Pf01540, Pf01576, Pf02463, Pf04111, Pf04156, Pf05483, Pf05557, Pf05622, Pf06008, Pf06160, Pf06637, Pf07888, Pf10174, Pf12072, Pf12128, Pf13166	0.158	0.11	-2.67	-3.18	9.95495e+07	1.56912e+07	1.10949e+08	1.22188e+07	18	14	17	12	0.428	0	59.35	30
FALSE	High	IsMasterProtein	Q13509	Tubulin beta-3 chain OS=Homo sapiens GN=TUBB3 PE=1 SV=2	FALSE	0	111.813	31.5556	13	57	1	1	450	50.4	4.93	High	Not Found	Not Found	Not Found	Dimethyl [K19; K103; K122; K174; K252; K297; K350]	10381	ENSG00000258947.6	TUBB3	16	cell differentiation;cell organization and biogenesis;cellular component movement	cytoplasm;cytoskeleton;nucleus	catalytic activity;nucleotide binding;protein binding;structural molecule activity	Pf00091, Pf03953, Pf10644	0.01		-6.64		1.28677e+06				1				15.496	0	97.3	13
FALSE	High	IsMasterProtein	P08238	Heat shock protein HSP 90-beta OS=Homo sapiens GN=HSP90AB1 PE=1 SV=4	FALSE	0	109.051	38.674	20	41	20	1	724	83.2	5.03	High	High	High	High	Dimethyl [K53; K64; K69; K95; K107; K219; K275; K284; K306; K319; K491; K526]	3326	ENSG00000096384.19	HSP90AB1	6	cell organization and biogenesis;metabolic process;regulation of biological process;response to stimulus;transport	cell surface;cytoplasm;cytosol;extracellular;membrane;mitochondrion;nucleus;organelle lumen	enzyme regulator activity;nucleotide binding;protein binding;RNA binding	Pf00183, Pf02518, Pf13589	0.311	0.173	-1.69	-2.53	1.6324e+08	5.07168e+07	2.51913e+08	4.3501e+07	13	11	13	13	3.479	0	58.56	20
FALSE	High	IsMasterProtein	Q15149	Plectin OS=Homo sapiens GN=PLEC PE=1 SV=3	FALSE	0	105.6	11.0589	35	45	34	1	4684	531.5	5.96	High	Peak Found	High	High	Dimethyl [K386; K581; K1210; K2182; K2463; K2473; K2761; K2841; K3231; K3352; K3568; K4060]	5339	ENSG00000178209.14	PLEC	8	cell organization and biogenesis	cytoplasm;cytoskeleton;cytosol;membrane	protein binding;RNA binding;structural molecule activity	Pf00307, Pf00681, Pf03501, Pf07812	0.265	0.13	-1.91	-2.94	5.83114e+07	1.54647e+07	7.8153e+07	1.01578e+07	16	11	19	15	0.272	1	38.13	35
FALSE	High	IsMasterProtein	P11940	Polyadenylate-binding protein 1 OS=Homo sapiens GN=PABPC1 PE=1 SV=2	FALSE	0	105.079	32.2327	22	59	13	1	636	70.6	9.5	High	High	High	High	Dimethyl [K78; K104; K129; K167; K188; K196; K208; K221; K299; K312; K324; K333; K348; K361]	26986	ENSG00000070756.15	PABPC1	8	metabolic process;regulation of biological process	cytoplasm;cytosol;membrane;nucleus;spliceosomal complex	nucleotide binding;protein binding;RNA binding;translation regulator activity	Pf00076, Pf00658, Pf13893, Pf14259	0.281	0.518	-1.83	-0.95	1.51617e+09	4.26622e+08	3.85628e+08	1.99822e+08	20	19	18	18	6.499	12	62.98	22
FALSE	High	IsMasterProtein	Q8WWI1-3	Isoform 3 of LIM domain only protein 7 OS=Homo sapiens GN=LMO7	FALSE	0	102.38	29.0586	29	48	29	1	1349	153.6	7.75	High	High	High	High	Dimethyl [K410; K480; K510; K518; K604; K640; K671; K768; K776; K812; K1003; K1015; K1027]	4008	ENSG00000136153.19	LMO7	13	metabolic process;regulation of biological process	cytoplasm;cytosol;nucleus	catalytic activity;metal ion binding;protein binding	Pf00307, Pf00412, Pf00595, Pf13180	2.923	1.839	1.55	0.88	1.92761e+08	5.63388e+08	5.75916e+07	1.05896e+08	23	26	10	10	1.783	0	28.56	29
FALSE	High	IsMasterProtein	P19474	E3 ubiquitin-protein ligase TRIM21 OS=Homo sapiens GN=TRIM21 PE=1 SV=1	FALSE	0	93.312	49.0526	20	51	20	1	475	54.1	6.38	High	High	High	High	Dimethyl [K77; K138; K202; K260; K279; K280; K341; K351; K385]	6737	ENSG00000132109.9	TRIM21	11	cell organization and biogenesis;defense response;metabolic process;regulation of biological process;response to stimulus	cytoplasm;cytosol;nucleus;vacuole	catalytic activity;DNA binding;metal ion binding;protein binding;RNA binding	Pf00097, Pf00622, Pf00643, Pf11789, Pf12128, Pf12678, Pf13445, Pf13639, Pf13765, Pf13920, Pf13923, Pf14570, Pf14634, Pf14835, Pf15227	0.331	0.177	-1.59	-2.5	4.79294e+08	1.58722e+08	6.62348e+08	1.16984e+08	15	14	15	13	9.771	0	52.47	20
FALSE	High	IsMasterProtein	P31943	Heterogeneous nuclear ribonucleoprotein H OS=Homo sapiens GN=HNRNPH1 PE=1 SV=4	FALSE	0	93.219	41.2027	12	39	6	1	449	49.2	6.3	High	Peak Found	High	High	Dimethyl [K68; K98; K124; K167]	3187	ENSG00000169045.17; ENSG00000284254.1	HNRNPH1	5; CHR_HG30_PATCH	metabolic process;regulation of biological process;response to stimulus	cytosol;membrane;nucleus;spliceosomal complex	nucleotide binding;protein binding;RNA binding	Pf00076, Pf08080, Pf14259	0.106	0.164	-3.24	-2.61	3.90026e+08	4.14002e+07	3.90864e+08	6.40276e+07	10	10	10	9	5.918	9	66.35	12
FALSE	High	IsMasterProtein	P07951-2	Isoform 2 of Tropomyosin beta chain OS=Homo sapiens GN=TPM2	FALSE	0	91.312	56.338	25	53	6	1	284	33	4.67	Not Found	High	Not Found	High	Dimethyl [K168]	7169	ENSG00000198467.13	TPM2	9	cell organization and biogenesis;cellular component movement;regulation of biological process	cytosol	protein binding;structural molecule activity	Pf00261, Pf12718	23.085	35.505	4.53	5.15	1.50116e+08	3.4654e+09	7.18825e+06	2.55219e+08	13	22	5	11	29.079	19	51.67	25
FALSE	High	IsMasterProtein	P04406	Glyceraldehyde-3-phosphate dehydrogenase OS=Homo sapiens GN=GAPDH PE=1 SV=3	FALSE	0	90.708	54.9254	12	37	12	1	335	36	8.46	High	High	High	High	Dimethyl [K55; K84; K162; K186; K215; K227; K334]	2597	ENSG00000111640.14	GAPDH	12	cell death;cell organization and biogenesis;metabolic process;regulation of biological process;response to stimulus	cytoplasm;cytoskeleton;cytosol;membrane;nucleus	catalytic activity;nucleotide binding;protein binding	Pf00044, Pf02800	0.365	0.436	-1.45	-1.2	1.53914e+08	5.62072e+07	5.28227e+08	2.3049e+08	10	9	12	12	14.505	0	41.17	12
FALSE	High	IsMasterProtein	P58107	Epiplakin OS=Homo sapiens GN=EPPK1 PE=1 SV=2	FALSE	0	89.541	27.2692	18	30	17	1	5090	555.3	5.6	High	Peak Found	High	High	Dimethyl [K19429; K19429; K19429; K21471; K21471; K21471; K24195; K24195; K24195]	83481		EPPK1	8	cell organization and biogenesis;regulation of biological process;response to stimulus	cytoplasm;cytoskeleton;membrane	protein binding;RNA binding	Pf00681	0.136	0.151	-2.88	-2.73	6.15179e+07	8.37044e+06	6.13415e+07	9.27506e+06	10	6	12	5	0.194	0	39.82	18
FALSE	High	IsMasterProtein	Q9UQ35	Serine/arginine repetitive matrix protein 2 OS=Homo sapiens GN=SRRM2 PE=1 SV=2	FALSE	0	88.771	15.407	26	35	26	1	2752	299.4	12.06	Peak Found	High	Not Found	High		23524	ENSG00000167978.16	SRRM2	16	metabolic process	nucleus;spliceosomal complex	protein binding;RNA binding		100	100	6.64	6.64	2.13365e+06	3.67718e+08		1.89802e+06	5	22		1	0.543	0	50.36	26
FALSE	High	IsMasterProtein	Q9UPQ0	LIM and calponin homology domains-containing protein 1 OS=Homo sapiens GN=LIMCH1 PE=1 SV=4	FALSE	0	87.066	29.2705	23	32	23	1	1083	121.8	6.47	High	High	Peak Found	High	Dimethyl [K273; K685]	22998	ENSG00000064042.17	LIMCH1	4	cell organization and biogenesis		metal ion binding;protein binding	Pf00307, Pf00412	7.734	16.204	2.95	4.02	6.40264e+07	4.95191e+08	450957	7.30751e+06	15	22	2	3	1.462	0	46.99	23
FALSE	High	IsMasterProtein	P26641-2	Isoform 2 of Elongation factor 1-gamma OS=Homo sapiens GN=EEF1G	FALSE	0	87.044	49.076	18	49	18	1	487	56.1	7.72	High	High	High	High	Dimethyl [K197; K344; K478]	1937		EEF1G	11	metabolic process;response to stimulus	cytoplasm;cytosol;endoplasmic reticulum;membrane;nucleus	protein binding;RNA binding	Pf00043, Pf00647, Pf02798, Pf13409, Pf13410, Pf13417, Pf14497	36.516	31.637	5.19	4.98	2.82346e+07	1.03103e+09	5.06831e+07	1.60348e+09	7	10	12	12	5.898	0	89.82	18
FALSE	High	IsMasterProtein	O00159	Unconventional myosin-Ic OS=Homo sapiens GN=MYO1C PE=1 SV=4	FALSE	0	86.782	22.7658	18	29	18	1	1063	121.6	9.41	High	High	High	Peak Found	Dimethyl [K188; K209; K224; K396; K618; K704; K709; K882; K927; K1047]	4641	ENSG00000197879.14	MYO1C	17	cell organization and biogenesis;regulation of biological process;response to stimulus;transport	cytoplasm;cytosol;membrane;nucleus	catalytic activity;motor activity;nucleotide binding;protein binding	Pf00063, Pf06017	0.544	0.269	-0.88	-1.9	1.69921e+08	9.24497e+07	8.12148e+06	2.18336e+06	14	13	2	2	1.412	0	42.28	18
FALSE	High	IsMasterProtein	P25705	ATP synthase subunit alpha, mitochondrial OS=Homo sapiens GN=ATP5A1 PE=1 SV=1	FALSE	0	85.094	44.8463	18	34	18	1	553	59.7	9.13	High	High	High	High	Dimethyl [K103; K161; K194; K230; K316; K498; K503]	498	ENSG00000152234.15	ATP5A1	18	metabolic process;regulation of biological process;transport	membrane;mitochondrion;organelle lumen	catalytic activity;nucleotide binding;protein binding;RNA binding;transporter activity	Pf00006, Pf00306, Pf02663, Pf02874, Pf05943	0.142	0.116	-2.82	-3.11	3.53557e+08	5.01047e+07	3.54258e+08	4.11103e+07	13	12	13	11	3.453	0	44.99	18
FALSE	High	IsMasterProtein	P09651	Heterogeneous nuclear ribonucleoprotein A1 OS=Homo sapiens GN=HNRNPA1 PE=1 SV=5	FALSE	0	84.834	30.6452	12	38	10	1	372	38.7	9.13	High	High	High	High	Dimethyl [K15; K78; K113; K130; K161; K350]	3178	ENSG00000135486.17	HNRNPA1	12	metabolic process;regulation of biological process;response to stimulus;transport	cytoplasm;membrane;nucleus;spliceosomal complex	DNA binding;nucleotide binding;protein binding;RNA binding	Pf00076, Pf13893, Pf14259	1.376	1.59	0.46	0.67	4.79338e+08	6.59658e+08	1.35064e+08	2.14763e+08	10	10	7	7	10.22	0	56.18	12
FALSE	High	IsMasterProtein	Q9BWD1	Acetyl-CoA acetyltransferase, cytosolic OS=Homo sapiens GN=ACAT2 PE=1 SV=2	FALSE	0	84.757	57.1788	13	29	13	1	397	41.3	6.92	Not Found	High	Not Found	High		39	ENSG00000120437.8	ACAT2	6	metabolic process	cytoplasm;cytosol;mitochondrion;nucleus	catalytic activity;protein binding	Pf00108, Pf00109, Pf02803	100	100	6.64	6.64		2.7595e+08		1.05618e+08		11		8	4.926	0	73.71	13
FALSE	High	IsMasterProtein	Q68EM7	Rho GTPase-activating protein 17 OS=Homo sapiens GN=ARHGAP17 PE=1 SV=1	FALSE	0	82.58	36.5494	20	35	20	1	881	95.4	7.62	Peak Found	High	Not Found	High		55114	ENSG00000140750.16	ARHGAP17	16	regulation of biological process;response to stimulus	cytoplasm;cytosol;membrane;nucleus	enzyme regulator activity;protein binding	Pf00620, Pf03114	100	100	6.64	6.64	436929	9.83352e+07		7.92904e+07	1	12		14	2.728	0	52.76	20
FALSE	High	IsMasterProtein	Q13813	Spectrin alpha chain, non-erythrocytic 1 OS=Homo sapiens GN=SPTAN1 PE=1 SV=3	FALSE	0	82.205	13.9563	23	34	23	1	2472	284.4	5.35	Peak Found	High	High	High	Dimethyl [K814; K824; K1288; K1417; K1519; K1570; K1910; K2017; K2088; K2098]	6709	ENSG00000197694.15	SPTAN1	9	cell organization and biogenesis;cellular component movement;metabolic process;regulation of biological process;response to stimulus;transport	cytoplasm;cytoskeleton;cytosol;extracellular;membrane;organelle lumen	metal ion binding;protein binding;structural molecule activity	Pf00018, Pf00036, Pf00435, Pf07653, Pf08239, Pf08726, Pf13405, Pf13499, Pf14604	5.943	0.77	2.57	-0.38	3.12917e+06	1.85953e+07	3.96873e+07	3.05604e+07	4	11	15	14	0.421	0	19.27	23
FALSE	High	IsMasterProtein	P07951	Tropomyosin beta chain OS=Homo sapiens GN=TPM2 PE=1 SV=1	FALSE	0	80.121	52.4648	23	50	3	1	284	32.8	4.7	Peak Found	High	Not Found	High	Dimethyl [K168]	7169	ENSG00000198467.13	TPM2	9	cell organization and biogenesis;cellular component movement;regulation of biological process	cytoplasm;cytoskeleton;cytosol	protein binding;structural molecule activity	Pf00261, Pf12718	40.357	100	5.33	6.64	1.41171e+06	5.6972e+07		4.37433e+06	2	4		2	21.275	1	42.72	23
FALSE	High	IsMasterProtein	CON_P04264	SWISS-PROT P04264 Tax_Id=9606 Gene_Symbol=KRT1 Keratin, type II cytoskeletal 1	TRUE	0	79.378	21.2733	13	36	11	1	644	66	8.12	High	High	High	High	Dimethyl [K74; K197; K211; K288; K289; K355]									0.946	0.422	-0.08	-1.25	2.03404e+08	1.92342e+08	1.4514e+08	6.12192e+07	10	10	9	8	3.549	1	49.06	13
FALSE	High	IsMasterProtein	P14618	Pyruvate kinase PKM OS=Homo sapiens GN=PKM PE=1 SV=4	FALSE	0	78.108	50.8475	18	30	18	1	531	57.9	7.84	High	High	High	High	Dimethyl [K89; K115; K151; K162; K207; K224; K230; K305; K322; K336; K367; K422; K433; K475]	5315	ENSG00000067225.17	PKM	15	cell death;metabolic process;response to stimulus;transport	cytoplasm;cytosol;extracellular;mitochondrion;nucleus;organelle lumen	catalytic activity;metal ion binding;nucleotide binding;protein binding;RNA binding	Pf00224, Pf02887	0.909	0.856	-0.14	-0.22	8.82116e+07	8.02064e+07	4.02717e+07	3.44569e+07	14	13	7	8	3.453	0	31.35	18
FALSE	High	IsMasterProtein	P22626	Heterogeneous nuclear ribonucleoproteins A2/B1 OS=Homo sapiens GN=HNRNPA2B1 PE=1 SV=2	FALSE	0	77.483	53.5411	15	38	13	1	353	37.4	8.95	High	High	High	High	Dimethyl [K22; K46; K120; K137; K168]	3181	ENSG00000122566.20	HNRNPA2B1	7	metabolic process;regulation of biological process;transport	cytoplasm;extracellular;membrane;nucleus;spliceosomal complex	DNA binding;nucleotide binding;protein binding;RNA binding	Pf00076, Pf13893, Pf14259	2.563	1.813	1.36	0.86	3.97001e+08	1.01764e+09	1.18048e+08	2.14022e+08	16	16	11	11	15.238	3	37.18	15
FALSE	High	IsMasterProtein	P09493-10	Isoform 10 of Tropomyosin alpha-1 chain OS=Homo sapiens GN=TPM1	FALSE	0	75.795	43.662	23	45	3	1	284	32.8	4.77	Peak Found	High	Not Found	Not Found	Dimethyl [K168]	7168	ENSG00000140416.19	TPM1	15	cell organization and biogenesis;cellular component movement;regulation of biological process;response to stimulus	cytoskeleton;cytosol	protein binding;structural molecule activity	Pf00261, Pf12718	13.993	14.659	3.81	3.87	4.65776e+07	6.51751e+08	4.18741e+06	61383711	5	9	1	5	15.496	8	47.19	23
FALSE	High	IsMasterProtein	O75330-3	Isoform 3 of Hyaluronan mediated motility receptor OS=Homo sapiens GN=HMMR	FALSE	0	75.29	41.2414	25	44	25	1	725	84.2	5.9	Peak Found	High	Peak Found	High		3161	ENSG00000072571.19	HMMR	5	metabolic process	cell surface;cytosol;membrane	protein binding	Pf04111	86.792	70.859	6.44	6.15	2.46163e+06	213651254	5.6895e+06	4.0315e+08	3	13	7	20	1.976	0	62.76	25
FALSE	High	IsMasterProtein	Q13310-3	Isoform 3 of Polyadenylate-binding protein 4 OS=Homo sapiens GN=PABPC4	FALSE	0	74.036	25.4545	17	35	8	1	660	72.3	9.35	High	High	High	High	Dimethyl [K78; K104; K129; K167; K188; K196; K208; K216; K240; K309; K312; K324; K333; K348; K361]	8761	ENSG00000090621.13	PABPC4	1	coagulation;metabolic process	cytoplasm;cytosol;nucleus	nucleotide binding;protein binding;RNA binding	Pf00076, Pf00658, Pf13893, Pf14259	0.267	0.453	-1.91	-1.14	8.45463e+07	2.25451e+07	4.8222e+07	2.18431e+07	4	4	5	5	2.728	0	45.82	17
FALSE	High	IsMasterProtein	P23246	Splicing factor, proline- and glutamine-rich OS=Homo sapiens GN=SFPQ PE=1 SV=2	FALSE	0	72.667	25.884	13	21	12	1	707	76.1	9.44	High	High	High	Peak Found	Dimethyl [K314; K330; K421; K462; K518]	6421	ENSG00000116560.10	SFPQ	1	cell organization and biogenesis;metabolic process;regulation of biological process;response to stimulus	chromosome;cytoplasm;nucleus	DNA binding;nucleotide binding;protein binding;RNA binding	Pf00076, Pf08075, Pf13893, Pf14259	0.055	0.188	-4.18	-2.41	6.00058e+08	3.31537e+07	2.13472e+07	4.01416e+06	12	9	3	3	2.162	1	34.59	13
FALSE	High	IsMasterProtein	P10809	60 kDa heat shock protein, mitochondrial OS=Homo sapiens GN=HSPD1 PE=1 SV=2	FALSE	0	68.728	33.8569	12	20	12	1	573	61	5.87	High	High	High	High	Dimethyl [K58; K156; K157; K218; K233; K249; K269; K405; K473; K481; K516]	3329	ENSG00000144381.16	HSPD1	2	cell organization and biogenesis;cell proliferation;metabolic process;regulation of biological process;response to stimulus;transport	cell surface;cytoplasm;cytosol;endoplasmic reticulum;endosome;Golgi;membrane;mitochondrion;organelle lumen	catalytic activity;DNA binding;nucleotide binding;protein binding;RNA binding	Pf00118	0.625	0.518	-0.68	-0.95	6.10481e+07	3.81724e+07	6.42048e+07	3.32572e+07	6	6	8	8	1.783	0	34.57	12
FALSE	High	IsMasterProtein	O43707	Alpha-actinin-4 OS=Homo sapiens GN=ACTN4 PE=1 SV=2	FALSE	0	68.223	30.0768	20	29	10	1	911	104.8	5.44	Peak Found	High	High	High	Dimethyl [K273; K300; K395]	81	ENSG00000282844.1; ENSG00000130402.11	ACTN4	19; CHR_HG26_PATCH	cell organization and biogenesis;cellular component movement;regulation of biological process;response to stimulus;transport	cytoplasm;cytoskeleton;cytosol;extracellular;nucleus;organelle lumen	DNA binding;metal ion binding;protein binding;RNA binding	Pf00307, Pf00435, Pf08726, Pf11971, Pf13499	6.752	0.923	2.76	-0.12	5.6131e+06	3.78985e+07	1.29291e+08	1.19355e+08	5	6	17	17	1.683	12	16.67	20
FALSE	High	IsMasterProtein	Q00839	Heterogeneous nuclear ribonucleoprotein U OS=Homo sapiens GN=HNRNPU PE=1 SV=6	FALSE	0	68.195	26.4242	13	27	13	1	825	90.5	6	High	High	High	High	Dimethyl [K265; K433; K464; K536]	3192	ENSG00000153187.18	HNRNPU	1	cell differentiation;metabolic process;regulation of biological process;response to stimulus	cell surface;cytoplasm;membrane;nucleus;spliceosomal complex	DNA binding;nucleotide binding;protein binding;RNA binding	Pf00622, Pf13671	3.355	1.024	1.75	0.03	9.62659e+07	3.22987e+08	4.11161e+07	4.21061e+07	8	12	4	4	1.929	0	27.44	13
FALSE	High	IsMasterProtein	P06753-2	Isoform 2 of Tropomyosin alpha-3 chain OS=Homo sapiens GN=TPM3	FALSE	0	67.829	55.6452	21	42	8	1	248	29	4.78	High	High	Peak Found	High	Dimethyl [K181; K184; K190; K223; K225]	7170	ENSG00000143549.19	TPM3	1	cell organization and biogenesis;cellular component movement	cytoskeleton;cytosol	protein binding;structural molecule activity	Pf00261, Pf12718	9.46	11.28	3.24	3.5	6.08753e+07	5.75873e+08	4.81616e+06	5.43284e+07	10	10	3	5	16.302	5	37.84	21
FALSE	High	IsMasterProtein	P60660-2	Isoform Smooth muscle of Myosin light polypeptide 6 OS=Homo sapiens GN=MYL6	FALSE	0	66.959	76.1589	10	51	8	1	151	17	4.55	High	High	High	High	Dimethyl [K50; K79; K98; K119]	4637	ENSG00000092841.18	MYL6	12	cellular component movement	cytosol;membrane	catalytic activity;metal ion binding;motor activity;protein binding;structural molecule activity	Pf00036, Pf13405, Pf13499	8.222	7.859	3.04	2.97	1.10445e+09	9.08037e+09	1.21245e+08	9.52841e+08	12	12	7	9	122.285	3	60.75	10
FALSE	High	IsMasterProtein	P09493-2	Isoform 2 of Tropomyosin alpha-1 chain OS=Homo sapiens GN=TPM1	FALSE	0	66.392	57.4561	21	44	2	1	228	26.7	4.82	Peak Found	High	Peak Found	High	Dimethyl [K112]								Pf00261, Pf12718	19.951	13.9	4.32	3.8	1.36488e+07	2.72303e+08	3.18695e+06	4.42993e+07	4	5	3	3	32.839	3	35.36	21
FALSE	High	IsMasterProtein	P15880	40S ribosomal protein S2 OS=Homo sapiens GN=RPS2 PE=1 SV=2	FALSE	0	65.497	38.2253	10	33	10	1	293	31.3	10.24	High	High	High	High	Dimethyl [K58; K65; K89; K103; K108; K211; K238; K246; K257; K275]	6187	ENSG00000140988.15	RPS2	16	cell organization and biogenesis;metabolic process;regulation of biological process;transport	cytosol;membrane;nucleus;ribosome	protein binding;RNA binding;structural molecule activity	Pf00333, Pf03719	0.464	0.679	-1.11	-0.56	1.23527e+08	5.73007e+07	1.27953e+08	8.69137e+07	8	10	9	9	5.579	0	29.3	10
FALSE	High	IsMasterProtein	Q6YHK3	CD109 antigen OS=Homo sapiens GN=CD109 PE=1 SV=2	FALSE	0	65.009	11.6263	11	20	11	1	1445	161.6	5.85	High	High	Not Found	Not Found	Dimethyl [K158; K161; K191; K244; K276; K451; K471; K1189]	135228	ENSG00000156535.13	CD109	6	metabolic process;regulation of biological process;transport	cell surface;extracellular;membrane	enzyme regulator activity;protein binding	Pf00207, Pf01835, Pf07677, Pf07678, Pf07703, Pf10569, Pf11974, Pf13249	0.597		-0.74		6.17257e+07	3.68771e+07			11	11			0.752	0	23.08	11
FALSE	High	IsMasterProtein	P23396	40S ribosomal protein S3 OS=Homo sapiens GN=RPS3 PE=1 SV=2	FALSE	0	64.303	64.6091	14	30	14	1	243	26.7	9.66	High	High	High	High	Dimethyl [K18; K90; K132; K197; K202; K214; K227; K230]	6188	ENSG00000149273.14	RPS3	11	cell death;cell division;cell organization and biogenesis;metabolic process;regulation of biological process;response to stimulus;transport	cytoplasm;cytoskeleton;cytosol;endoplasmic reticulum;membrane;mitochondrion;nucleus;organelle lumen;ribosome	catalytic activity;DNA binding;protein binding;RNA binding;structural molecule activity	Pf00189, Pf07650	0.207	0.211	-2.27	-2.24	4.00828e+08	8.29201e+07	2.23934e+08	4.72641e+07	11	11	8	5	11.743	0	30.9	14
FALSE	High	IsMasterProtein	Q9ULV4-3	Isoform 3 of Coronin-1C OS=Homo sapiens GN=CORO1C	FALSE	0	63.909	23.3397	8	24	8	1	527	58.9	7.75	High	High	High	High	Dimethyl [K338; K364; K395; K444; K480]	23603	ENSG00000110880.10	CORO1C	12	cell organization and biogenesis;cellular component movement;regulation of biological process;response to stimulus;transport	cytoplasm;cytoskeleton	protein binding	Pf00400, Pf08953, Pf08954	1.259	0.715	0.33	-0.48	2.69008e+08	3.38617e+08	1.31428e+08	9.39441e+07	8	8	5	5	2.687	0	37.82	8
FALSE	High	IsMasterProtein	Q9Y2W1	Thyroid hormone receptor-associated protein 3 OS=Homo sapiens GN=THRAP3 PE=1 SV=2	FALSE	0	63.545	16.0209	14	34	14	1	955	108.6	10.15	High	High	Peak Found	High	Dimethyl [K486; K639]	9967	ENSG00000054118.13	THRAP3	1	metabolic process;regulation of biological process;response to stimulus	nucleus	DNA binding;nucleotide binding;protein binding;receptor activity;RNA binding	Pf15440	2.184	52.792	1.13	5.72	1.19006e+08	2.59863e+08	1.57064e+07	8.29179e+08	8	8	8	15	1.212	0	32.35	14
FALSE	High	IsMasterProtein	O00571	ATP-dependent RNA helicase DDX3X OS=Homo sapiens GN=DDX3X PE=1 SV=3	FALSE	0	63.038	24.9245	12	25	11	1	662	73.2	7.18	High	High	High	High	Dimethyl [K162; K440]	1654	ENSG00000215301.9	DDX3X	X	cell death;cell organization and biogenesis;defense response;metabolic process;regulation of biological process;response to stimulus;transport	cytoplasm;cytosol;extracellular;membrane;mitochondrion;nucleus;organelle lumen	catalytic activity;DNA binding;nucleotide binding;protein binding;RNA binding	Pf00270, Pf00271, Pf04851	0.327	0.411	-1.61	-1.28	8.66023e+07	2.83225e+07	6.87896e+07	2.82733e+07	8	9	8	7	1.683	0	34.04	12
FALSE	High	IsMasterProtein	P09493-5	Isoform 5 of Tropomyosin alpha-1 chain OS=Homo sapiens GN=TPM1	FALSE	0	62.186	43.2653	19	40	1	1	245	28.4	4.77	High	High	Not Found	Not Found	Dimethyl [K132]	7168	ENSG00000140416.19	TPM1	15	cell organization and biogenesis;cellular component movement;regulation of biological process;response to stimulus	cytoskeleton;cytosol	protein binding;structural molecule activity	Pf00261, Pf12718	15.987		4		3.63797e+06	5.816e+07			1	1			11.328	0	32.77	19
FALSE	High	IsMasterProtein	Q13283	Ras GTPase-activating protein-binding protein 1 OS=Homo sapiens GN=G3BP1 PE=1 SV=1	FALSE	0	59.011	37.9828	12	23	12	1	466	52.1	5.52	High	High	Not Found	Not Found	Dimethyl [K123; K257; K276; K287; K357; K393]	10146	ENSG00000145907.14	G3BP1	5	metabolic process;regulation of biological process;response to stimulus;transport	cytoplasm;cytosol;membrane;nucleus	catalytic activity;DNA binding;nucleotide binding;protein binding;RNA binding	Pf00076, Pf02136, Pf13893, Pf14259	0.171		-2.55		4.54467e+08	7.76681e+07			13	13			4.623	0	38.19	12
FALSE	High	IsMasterProtein	P67936	Tropomyosin alpha-4 chain OS=Homo sapiens GN=TPM4 PE=1 SV=3	FALSE	0	57.131	52.8226	18	39	6	1	248	28.5	4.69	Peak Found	High	Peak Found	High	Dimethyl [K132]	7171	ENSG00000167460.14	TPM4	19	cell differentiation;cell organization and biogenesis;cellular component movement	cytoplasm;cytoskeleton;cytosol;membrane	metal ion binding;protein binding;structural molecule activity	Pf00261, Pf12718	28.728	11.439	4.84	3.52	6.05943e+06	1.74077e+08	1.34165e+06	1.53472e+07	4	5	1	1	12.895	0	27.48	18
FALSE	High	IsMasterProtein	Q16643-3	Isoform 3 of Drebrin OS=Homo sapiens GN=DBN1	FALSE	0	56.57	23.4532	11	19	11	1	695	76.3	4.51	Peak Found	High	High	High	Dimethyl [K62; K165]	1627	ENSG00000113758.13	DBN1	5	cell communication;cell organization and biogenesis;cell proliferation;regulation of biological process	cytoplasm;cytoskeleton;membrane	protein binding	Pf00241	7.129	0.811	2.83	-0.3	1.51374e+07	1.07913e+08	4.87505e+07	39537237	5	8	4	4	2.162	0	24.9	11
FALSE	High	IsMasterProtein	Q9UPN9	E3 ubiquitin-protein ligase TRIM33 OS=Homo sapiens GN=TRIM33 PE=1 SV=3	FALSE	0	56.102	18.5448	16	21	16	1	1127	122.5	6.67	High	Peak Found	High	Peak Found	Dimethyl [K200; K258; K259; K280; K320; K329; K334; K375; K376; K389; K432; K776; K793; K861; K1076]	51592	ENSG00000197323.11	TRIM33	1	metabolic process;regulation of biological process	nucleus	catalytic activity;DNA binding;metal ion binding;protein binding	Pf00439, Pf00628, Pf00643, Pf13639	0.01	0.023	-6.64	-5.46	1.16486e+08	239248	4.5464e+07	1.02963e+06	12	1	6	1	0.887	0	25.45	16
FALSE	High	IsMasterProtein	P17844	Probable ATP-dependent RNA helicase DDX5 OS=Homo sapiens GN=DDX5 PE=1 SV=1	FALSE	0	54.861	29.8046	13	26	9	1	614	69.1	8.92	High	High	High	High	Dimethyl [K284; K388; K451]	1655	ENSG00000108654.13	DDX5	17	cell growth;metabolic process;regulation of biological process;response to stimulus	membrane;nucleus;spliceosomal complex	catalytic activity;nucleotide binding;protein binding;RNA binding	Pf00270, Pf00271, Pf08061	0.472	0.674	-1.08	-0.57	1.51256e+08	7.14125e+07	1.13899e+08	7.68114e+07	12	12	10	10	2.371	6	24.92	13
FALSE	High	IsMasterProtein	Q06830	Peroxiredoxin-1 OS=Homo sapiens GN=PRDX1 PE=1 SV=1	FALSE	0	54.013	63.3166	10	28	10	1	199	22.1	8.13	High	High	High	High	Dimethyl [K27; K35; K92; K120; K136; K168; K178; K185; K190]	5052	ENSG00000117450.13	PRDX1	1	cell proliferation;cellular homeostasis;defense response;metabolic process;regulation of biological process;response to stimulus	cytoplasm;cytosol;mitochondrion;nucleus	antioxidant activity;catalytic activity;protein binding;RNA binding	Pf00578, Pf08534, Pf10417	0.916	0.58	-0.13	-0.79	2.02099e+08	1.85069e+08	2.95025e+08	1.71148e+08	7	8	8	8	21.758	0	30.27	10
FALSE	High	IsMasterProtein	P21333	Filamin-A OS=Homo sapiens GN=FLNA PE=1 SV=4	FALSE	0	51.848	10.8802	18	29	18	1	2647	280.6	6.06	High	High	High	High	Dimethyl [K87; K331; K936; K958; K973; K1486; K1573; K2513; K2623; K2631]	2316	ENSG00000196924.14	FLNA	X	cell organization and biogenesis;cellular component movement;metabolic process;regulation of biological process;response to stimulus;transport	cytoplasm;cytoskeleton;cytosol;extracellular;membrane;nucleus	protein binding;RNA binding;signal transducer activity	Pf00307, Pf00630	1.467	0.565	0.55	-0.82	1.81068e+07	2.65688e+07	6.99633e+07	3.95004e+07	6	8	14	13	0.396	0	7.41	18
FALSE	High	IsMasterProtein	P49792	E3 SUMO-protein ligase RanBP2 OS=Homo sapiens GN=RANBP2 PE=1 SV=2	FALSE	0	51.758	9.4603	22	28	22	1	3224	358	6.2	Peak Found	High	Peak Found	High		5903	ENSG00000153201.15	RANBP2	2	cell organization and biogenesis;metabolic process;regulation of biological process;response to stimulus;transport	cytoplasm;cytosol;membrane;mitochondrion;nucleus	catalytic activity;enzyme regulator activity;metal ion binding;protein binding;RNA binding	Pf00160, Pf00515, Pf00638, Pf00641, Pf07719, Pf12185, Pf13414, Pf13432, Pf14559	8.803	19.425	3.14	4.28	3.9934e+06	3.51543e+07	2.46814e+06	4.79446e+07	5	9	3	13	0.282	0	13.22	22
FALSE	High	IsMasterProtein	Q86V81	THO complex subunit 4 OS=Homo sapiens GN=ALYREF PE=1 SV=3	FALSE	0	51.247	45.5253	6	15	6	1	257	26.9	11.15	High	High	High	High	Dimethyl [K14; K86; K107]	10189		ALYREF	17	cell differentiation;metabolic process;regulation of biological process;response to stimulus;transport	cytoplasm;cytosol;membrane;nucleus;spliceosomal complex	nucleotide binding;protein binding;RNA binding	Pf00076, Pf13893, Pf14259	0.386	1.917	-1.37	0.94	2.80948e+08	1.08528e+08	3.17454e+07	6.08517e+07	6	6	3	3	5.31	0	30.1	6
FALSE	High	IsMasterProtein	P07910-2	Isoform C1 of Heterogeneous nuclear ribonucleoproteins C1/C2 OS=Homo sapiens GN=HNRNPC	FALSE	0	51.117	30.7167	10	29	10	1	293	32.3	5.08	High	High	High	High	Dimethyl [K29; K30; K39; K89; K193; K203]	3183	ENSG00000092199.17	HNRNPC	14	cell differentiation;cell organization and biogenesis;metabolic process;regulation of biological process	cytosol;membrane;nucleus;spliceosomal complex	DNA binding;nucleotide binding;protein binding;RNA binding	Pf00076, Pf13893, Pf14259	0.881	0.425	-0.18	-1.23	1.7746e+08	1.56304e+08	1.55221e+08	6.60232e+07	9	10	7	8	6.406	0	20.08	10
FALSE	High	IsMasterProtein	CON_Q1RMN8	TREMBL Q1RMN8 (Bos taurus) Similar to Immunoglobulin lambda-like polypeptide 1	TRUE	0	51.014	30.7692	5	44	5	1	234	24.5	7.62	High	High	High	High	Dimethyl [K151; K171; K208; K226]									0.631	0.826	-0.66	-0.28	5.37978e+08	3.3965e+08	3.11262e+08	2.57133e+08	7	7	4	4	11.115	0	88.04	5
FALSE	High	IsMasterProtein	O43795	Unconventional myosin-Ib OS=Homo sapiens GN=MYO1B PE=1 SV=3	FALSE	0	50.783	14.4366	11	18	11	1	1136	131.9	9.38	High	High	High	High	Dimethyl [K156; K222; K287; K529; K561; K1076]	4430	ENSG00000128641.18	MYO1B	2	cell organization and biogenesis;cellular component movement;transport	cytoplasm;endosome;membrane	catalytic activity;motor activity;nucleotide binding;protein binding	Pf00063, Pf06017	0.787	1.086	-0.35	0.12	5.8979e+07	4.64266e+07	5.75826e+06	6.25629e+06	9	9	3	4	0.693	0	14.26	11
FALSE	High	IsMasterProtein	P62424	60S ribosomal protein L7a OS=Homo sapiens GN=RPL7A PE=1 SV=2	FALSE	0	50.64	53.3835	14	30	14	1	266	30	10.61	High	High	High	High	Dimethyl [K20; K48; K75; K150; K185; K212; K217; K245]	6130	ENSG00000280858.2; ENSG00000148303.16	RPL7A	9; CHR_HG2030_PATCH	cell organization and biogenesis;metabolic process;transport	cytoplasm;cytosol;membrane;nucleus;ribosome	protein binding;RNA binding;structural molecule activity	Pf01248	0.687	1.12	-0.54	0.16	1.90324e+08	1.30808e+08	1.82034e+08	2.03875e+08	11	11	10	9	17.478	0	30.04	14
FALSE	High	IsMasterProtein	Q9Y224	UPF0568 protein C14orf166 OS=Homo sapiens GN=C14orf166 PE=1 SV=1	FALSE	0	50.456	29.5082	6	17	6	1	244	28.1	6.65	High	High	High	High	Dimethyl [K131; K185]	51637	ENSG00000087302.8	C14orf166	14	metabolic process;regulation of biological process;transport	cytoplasm;cytoskeleton;cytosol;nucleus	protein binding;RNA binding	Pf10036	0.286	0.587	-1.81	-0.77	6.20349e+07	1.77114e+07	3.1999e+06	1.87689e+06	7	7	1	2	4.275	0	33.91	6
FALSE	High	IsMasterProtein	CON_Q05B55	TREMBL Q05B55 (Bos taurus) Similar to Ig kappa chain C region	TRUE	0	50.372	34.1667	7	23	7	1	240	26.6	6.54	High	High	High	High	Dimethyl [K144; K151; K167; K174; K195; K196; K233]									0.659	0.84	-0.6	-0.25	2.83879e+08	1.87175e+08	2.76354e+08	2.32129e+08	6	6	7	7	9	0	38.32	7
FALSE	High	IsMasterProtein	P43243	Matrin-3 OS=Homo sapiens GN=MATR3 PE=1 SV=2	FALSE	0	50.248	18.2999	9	16	9	1	847	94.6	6.25	High	Peak Found	High	Peak Found	Dimethyl [K132; K146; K433; K515; K798; K817]	9782	ENSG00000015479.18; ENSG00000280987.4	MATR3	5	regulation of biological process	membrane;nucleus	metal ion binding;nucleotide binding;protein binding;RNA binding;structural molecule activity	Pf00076, Pf13893, Pf14259	0.096	0.072	-3.38	-3.79	3.26552e+07	3.13888e+06	30868900	2.23189e+06	4	4	5	2	0.758	0	30.89	9
FALSE	High	IsMasterProtein	P06748	Nucleophosmin OS=Homo sapiens GN=NPM1 PE=1 SV=2	FALSE	0	50.179	28.5714	7	23	7	1	294	32.6	4.78	High	High	Peak Found	High	Dimethyl [K73]	4869	ENSG00000181163.13	NPM1	5	cell organization and biogenesis;metabolic process;regulation of biological process;response to stimulus;transport	cytoplasm;cytoskeleton;cytosol;membrane;nucleus	enzyme regulator activity;protein binding;RNA binding	Pf03066	6.002	16.2	2.59	4.02	6.099e+07	3.66092e+08	3.80472e+07	6.16349e+08	4	5	4	9	4.275	0	38.24	7
FALSE	High	IsMasterProtein	P09382	Galectin-1 OS=Homo sapiens GN=LGALS1 PE=1 SV=2	FALSE	0	50.052	62.963	6	19	6	1	135	14.7	5.5	High	High	High	High	Dimethyl [K37; K64; K100; K108; K128]	3956	ENSG00000100097.11	LGALS1	22	cell death;cell differentiation;cellular homeostasis;regulation of biological process;response to stimulus	cell surface;cytoplasm;cytosol;extracellular;nucleus	protein binding;RNA binding;signal transducer activity	Pf00337	0.499	0.318	-1	-1.65	4.08964e+08	2.04065e+08	5.32771e+07	1.69538e+07	7	7	3	3	26.826	0	20.74	6
FALSE	High	IsMasterProtein	P36578	60S ribosomal protein L4 OS=Homo sapiens GN=RPL4 PE=1 SV=5	FALSE	0	49.4	25.2927	10	23	10	1	427	47.7	11.06	High	High	High	High	Dimethyl [K29; K140; K172; K364]	6124	ENSG00000174444.14	RPL4	15	cell organization and biogenesis;metabolic process;transport	cytoplasm;cytosol;membrane;nucleus;ribosome	protein binding;RNA binding;structural molecule activity	Pf00573, Pf14374	0.647	1.032	-0.63	0.05	8.78256e+07	5.6781e+07	1.10647e+08	1.14215e+08	6	6	9	9	2.415	0	25.74	10
FALSE	High	IsMasterProtein	P52597	Heterogeneous nuclear ribonucleoprotein F OS=Homo sapiens GN=HNRNPF PE=1 SV=3	FALSE	0	49.247	31.3253	8	18	7	1	415	45.6	5.58	High	High	High	High	Dimethyl [K68; K98; K124; K167]	3185	ENSG00000169813.16	HNRNPF	10	metabolic process;regulation of biological process;response to stimulus	cytosol;membrane;nucleus;spliceosomal complex	nucleotide binding;protein binding;RNA binding	Pf00076, Pf08080, Pf14259	0.206	0.283	-2.28	-1.82	4.42051e+07	9.12279e+06	4.14283e+07	1.17111e+07	7	5	4	4	2.325	0	27.95	8
FALSE	High	IsMasterProtein	Q9BUF5	Tubulin beta-6 chain OS=Homo sapiens GN=TUBB6 PE=1 SV=1	FALSE	0	48.97	21.3004	8	26	3	1	446	49.8	4.88	High	High	High	Peak Found	Dimethyl [K103; K174; K252; K350; K379]	84617	ENSG00000176014.12	TUBB6	18	cell organization and biogenesis	cytoplasm;cytoskeleton;nucleus	catalytic activity;nucleotide binding;structural molecule activity	Pf00091, Pf03953, Pf10644	0.05	0.061	-4.32	-4.03	3.36013e+07	1.68794e+06	1.44811e+07	885304	3	1	1	1	2.162	0	45.22	8
FALSE	High	IsMasterProtein	P41250	Glycine--tRNA ligase OS=Homo sapiens GN=GARS PE=1 SV=3	FALSE	0	47.925	25.8457	12	18	12	1	739	83.1	7.03	High	Peak Found	High	Peak Found	Dimethyl [K283; K309; K419; K501; K547; K615; K632]	2617	ENSG00000106105.13	GARS	7	metabolic process	cytoplasm;cytosol;extracellular;mitochondrion;organelle lumen	catalytic activity;nucleotide binding;protein binding	Pf00458, Pf00587, Pf03129	0.037	0.014	-4.74	-6.16	8.37064e+07	3.13309e+06	2.93699e+07	411101	8	7	7	1	0.719	0	32.03	12
FALSE	High	IsMasterProtein	Q9H4H8	Protein FAM83D OS=Homo sapiens GN=FAM83D PE=1 SV=3	FALSE	0	46.562	28.8889	15	23	15	1	585	64.4	6.54	Peak Found	High	Peak Found	High		81610	ENSG00000101447.14	FAM83D	20	cell division;cell organization and biogenesis;cell proliferation;cellular component movement;regulation of biological process	cytoplasm;cytoskeleton	protein binding	Pf07894, Pf13091	89.071	100	6.48	6.64	1.14857e+06	1.02304e+08	1.05373e+06	123878832	4	9	4	9	1.848	0	30.31	15
FALSE	High	IsMasterProtein	P61158	Actin-related protein 3 OS=Homo sapiens GN=ACTR3 PE=1 SV=3	FALSE	0	45.984	37.0813	9	15	9	1	418	47.3	5.88	High	High	High	High	Dimethyl [K69; K75]	10096	ENSG00000115091.11	ACTR3	2	cell division;cell organization and biogenesis;cellular component movement;regulation of biological process;response to stimulus	cytoplasm;cytoskeleton;cytosol;membrane	nucleotide binding;protein binding;structural molecule activity	Pf00022	2.763	2.639	1.47	1.4	1.11925e+07	3.09218e+07	7.82442e+06	2.06466e+07	5	5	4	5	2.008	0	31.08	9
FALSE	High	IsMasterProtein	P38159	RNA-binding motif protein, X chromosome OS=Homo sapiens GN=RBMX PE=1 SV=3	FALSE	0	45.88	20.9719	8	22	8	1	391	42.3	10.05	High	High	High	High	Dimethyl [K22; K41; K63; K80; K86]	27316	ENSG00000147274.14	RBMX	X	cell differentiation;cell organization and biogenesis;metabolic process;regulation of biological process;response to stimulus	membrane;nucleus;spliceosomal complex	DNA binding;nucleotide binding;protein binding;RNA binding	Pf00076, Pf08081, Pf13893, Pf14259	0.992	2.149	-0.01	1.1	2.66393e+08	2.64339e+08	5.28802e+07	1.13635e+08	7	7	4	6	1.656	0	19.2	8
FALSE	High	IsMasterProtein	P52907	F-actin-capping protein subunit alpha-1 OS=Homo sapiens GN=CAPZA1 PE=1 SV=3	FALSE	0	45.872	45.8042	8	16	7	1	286	32.9	5.69	High	High	High	High	Dimethyl [K66; K166]	829	ENSG00000116489.12	CAPZA1	1	cell organization and biogenesis;cellular component movement;coagulation;defense response;regulation of biological process;response to stimulus	cytoplasm;cytoskeleton;cytosol;extracellular	protein binding	Pf01267	2.99	2.731	1.58	1.45	1.0546e+08	315327820	6.68047e+06	1.82435e+07	5	7	2	2	3.87	1	26.29	8
FALSE	High	IsMasterProtein	P67809	Nuclease-sensitive element-binding protein 1 OS=Homo sapiens GN=YBX1 PE=1 SV=3	FALSE	0	45.849	27.7778	7	17	2	1	324	35.9	9.88	High	Not Found	Peak Found	High	Dimethyl [K81; K92; K118; K137]	4904	ENSG00000065978.18	YBX1	1	metabolic process;regulation of biological process	cytoplasm;cytosol;extracellular;membrane;nucleus;spliceosomal complex	DNA binding;protein binding;RNA binding	Pf00313	0.01	0.741	-6.64	-0.43	8881946		2.60091e+07	1.92632e+07	1		1	1	7.483	0	17.84	7
FALSE	High	IsMasterProtein	Q9BVQ7	Spermatogenesis-associated protein 5-like protein 1 OS=Homo sapiens GN=SPATA5L1 PE=1 SV=2	FALSE	0	45.329	24.3028	11	14	11	1	753	80.7	8.09	Not Found	Not Found	Peak Found	High		79029	ENSG00000171763.18	SPATA5L1	15	metabolic process;response to stimulus	cytoplasm	catalytic activity;nucleotide binding	Pf00004, Pf05496, Pf05673, Pf06068, Pf07724, Pf07726, Pf07728, Pf13173, Pf13191, Pf13207, Pf13401, Pf13671		39.693		5.31			927063	3.67983e+07			2	10	0.974	0	24.87	11
FALSE	High	IsMasterProtein	Q8NB90	Spermatogenesis-associated protein 5 OS=Homo sapiens GN=SPATA5 PE=1 SV=3	FALSE	0	45.027	26.9877	15	19	14	1	893	97.8	5.66	Not Found	High	Peak Found	High	Dimethyl [K400]	166378	ENSG00000145375.7	SPATA5	4	cell differentiation;development;metabolic process;response to stimulus	cytoplasm;mitochondrion	catalytic activity;nucleotide binding;RNA binding	Pf00004, Pf00910, Pf01057, Pf01078, Pf05496, Pf06068, Pf06414, Pf07724, Pf07726, Pf07728, Pf13173, Pf13191, Pf13401	100	17.612	6.64	4.14		3.34929e+06	4.53198e+06	7.98165e+07		3	3	12	0.987	1	19.25	15
FALSE	High	IsMasterProtein	Q04837	Single-stranded DNA-binding protein, mitochondrial OS=Homo sapiens GN=SSBP1 PE=1 SV=1	FALSE	0	44.637	38.5135	5	18	5	1	148	17.2	9.6	High	High	High	High	Dimethyl [K81; K145]	6742	ENSG00000106028.10	SSBP1	7	cell organization and biogenesis;metabolic process;regulation of biological process	mitochondrion;nucleus;organelle lumen	DNA binding;protein binding;RNA binding	Pf00436	5.126	2.008	2.36	1.01	3.13357e+07	1.60634e+08	4.79117e+06	9.61992e+06	3	4	2	3	11.328	0	26.12	5
FALSE	High	IsMasterProtein	P12814-4	Isoform 4 of Alpha-actinin-1 OS=Homo sapiens GN=ACTN1	FALSE	0	44.604	19.0323	14	22	4	1	930	107.1	5.58	Not Found	High	Peak Found	High	Dimethyl [K254]	87	ENSG00000072110.13	ACTN1	14	cell differentiation;cell organization and biogenesis;regulation of biological process;transport	cytoplasm;cytosol;extracellular;membrane;organelle lumen	metal ion binding;protein binding;RNA binding	Pf00307, Pf00435, Pf08726, Pf11971, Pf13499, Pf13833	100	1.538	6.64	0.62		2.57093e+06	4.73636e+06	7.28595e+06		2	2	3	1.077	0	9.39	14
FALSE	High	IsMasterProtein	P47756-2	Isoform 2 of F-actin-capping protein subunit beta OS=Homo sapiens GN=CAPZB	FALSE	0	44.25	44.1176	10	19	10	1	272	30.6	6	High	High	High	High	Dimethyl [K48; K95; K159; K235; K252]	832	ENSG00000077549.17	CAPZB	1	cell organization and biogenesis;cellular component movement;coagulation;regulation of biological process	cytoplasm;cytoskeleton;cytosol	protein binding	Pf01115	2.032	2.028	1.02	1.02	9.08235e+07	1.84536e+08	3.19417e+07	6.47737e+07	9	9	4	4	4.456	0	34.29	10
FALSE	High	IsMasterProtein	P63244	Receptor of activated protein C kinase 1 OS=Homo sapiens GN=RACK1 PE=1 SV=3	FALSE	0	43.777	65.9306	13	17	13	1	317	35.1	7.69	High	High	High	Peak Found	Dimethyl [K139; K172; K183; K212; K225; K257; K264; K271; K280]	10399	ENSG00000204628.11	GNB2L1; RACK1	5	cell death;cell differentiation;cellular homeostasis;development;metabolic process;regulation of biological process;response to stimulus	cytoplasm;cytosol;membrane;mitochondrion;nucleus;ribosome	enzyme regulator activity;protein binding;RNA binding;structural molecule activity	Pf00400	0.197	0.158	-2.35	-2.66	9.21786e+07	1.81245e+07	7.58964e+07	1.20143e+07	7	6	6	5	3.329	0	12.6	13
FALSE	High	IsMasterProtein	Q02878	60S ribosomal protein L6 OS=Homo sapiens GN=RPL6 PE=1 SV=3	FALSE	0	43.617	39.5833	11	28	11	1	288	32.7	10.58	High	High	High	High	Dimethyl [K94; K100; K124; K200; K218; K237; K260; K285]	6128	ENSG00000089009.15	RPL6	12	cell organization and biogenesis;metabolic process;regulation of biological process;transport	cytosol;membrane;nucleus;ribosome	DNA binding;protein binding;RNA binding;structural molecule activity	Pf01159, Pf03868	0.771	1.011	-0.38	0.02	1.15858e+08	8.93097e+07	1.00998e+08	1.02087e+08	7	9	8	7	6.848	0	10.69	11
FALSE	High	IsMasterProtein	CON_P02768-1	SWISS-PROT P02768-1 Tax_Id=9606 Gene_Symbol=ALB Isoform 1 of Serum albumin precursor	TRUE	0	43.168	10.3448	8	45	4	1	609	69.3	6.28	High	High	High	High	Dimethyl [K75; K264; K438; K549; K558]									2.436	3.381	1.28	1.76	1.0662e+08	2.5973e+08	9.24896e+07	3.127e+08	3	3	6	3	1.404	0	56.81	8
FALSE	High	IsMasterProtein	P16402	Histone H1.3 OS=Homo sapiens GN=HIST1H1D PE=1 SV=2	FALSE	0	42.936	23.9819	7	20	5	1	221	22.3	11.02	High	High	High	High	Dimethyl [K35; K47; K64; K76; K107]	3007	ENSG00000124575.6	HIST1H1D	6	cell organization and biogenesis;metabolic process;regulation of biological process	chromosome;nucleus	DNA binding;RNA binding	Pf00538	0.293	1.011	-1.77	0.02	6.94231e+08	2.03607e+08	1.46177e+08	1.47765e+08	5	5	5	5	4.878	2	41.66	7
FALSE	High	IsMasterProtein	P06753	Tropomyosin alpha-3 chain OS=Homo sapiens GN=TPM3 PE=1 SV=2	FALSE	0	42.412	38.5965	15	31	2	1	285	32.9	4.72	Peak Found	High	Not Found	Not Found	Dimethyl [K218; K221; K227]	7170	ENSG00000143549.19	TPM3	1	cell organization and biogenesis;cellular component movement	cytoplasm;cytoskeleton;cytosol	protein binding;structural molecule activity	Pf00261, Pf12718	2.845		1.51		1.57212e+06	4472474			1	1			4.109	0	22.97	15
FALSE	High	IsMasterProtein	Q07020	60S ribosomal protein L18 OS=Homo sapiens GN=RPL18 PE=1 SV=2	FALSE	0	42.358	33.5106	6	18	6	1	188	21.6	11.72	High	High	High	High	Dimethyl [K49; K132; K164]	6141	ENSG00000063177.12	RPL18	19	cell organization and biogenesis;metabolic process;transport	cytoplasm;cytosol;endoplasmic reticulum;membrane;nucleus;ribosome	RNA binding;structural molecule activity	Pf00828	0.749	1.024	-0.42	0.03	1.12042e+08	8.39046e+07	9.88862e+07	1.0123e+08	7	7	5	5	26.826	0	23.32	6
FALSE	High	IsMasterProtein	P06576	ATP synthase subunit beta, mitochondrial OS=Homo sapiens GN=ATP5B PE=1 SV=3	FALSE	0	41.789	25.1418	8	17	8	1	529	56.5	5.4	High	Peak Found	High	Peak Found	Dimethyl [K133; K225; K259; K480]	506	ENSG00000110955.8	ATP5B	12	cell differentiation;cell organization and biogenesis;cellular homeostasis;metabolic process;regulation of biological process;transport	cell surface;membrane;mitochondrion;nucleus;organelle lumen	catalytic activity;nucleotide binding;protein binding;transporter activity	Pf00006, Pf00306, Pf02874	0.058	0.076	-4.1	-3.72	7.23134e+07	4.22948e+06	8.16365e+07	6.19254e+06	7	6	7	4	1.102	0	26.53	8
FALSE	High	IsMasterProtein	P39023	60S ribosomal protein L3 OS=Homo sapiens GN=RPL3 PE=1 SV=2	FALSE	0	41.392	28.536	10	17	10	1	403	46.1	10.18	High	High	High	High	Dimethyl [K39; K50; K115; K193; K224; K334; K356]	6122	ENSG00000100316.15	RPL3	22	cell organization and biogenesis;metabolic process;response to stimulus;transport	cytoplasm;cytosol;nucleus;ribosome	protein binding;RNA binding;structural molecule activity	Pf00297	0.59	0.846	-0.76	-0.24	4.57816e+07	2.70014e+07	4.99274e+07	4.22183e+07	5	5	7	7	2.899	0	12.39	10
FALSE	High	IsMasterProtein	P62841	40S ribosomal protein S15 OS=Homo sapiens GN=RPS15 PE=1 SV=2	FALSE	0	41.368	55.1724	4	11	4	1	145	17	10.39	High	High	High	High	Dimethyl [K72; K77; K100; K108; K124; K127]	6209	ENSG00000115268.9	RPS15	19	cell differentiation;cell organization and biogenesis;metabolic process;transport	cytosol;membrane;nucleus;ribosome	DNA binding;protein binding;RNA binding;structural molecule activity	Pf00203	0.486	0.964	-1.04	-0.05	1.05884e+08	5.1414e+07	3.74564e+07	3.60976e+07	6	6	3	3	12.895	0	21.84	4
FALSE	High	IsMasterProtein	Q15233	Non-POU domain-containing octamer-binding protein OS=Homo sapiens GN=NONO PE=1 SV=4	FALSE	0	41.1	25.9023	9	17	8	1	471	54.2	8.95	High	Peak Found	High	Peak Found	Dimethyl [K198; K295; K467]	4841	ENSG00000147140.15	NONO	X	metabolic process;regulation of biological process;response to stimulus	membrane;nucleus	DNA binding;nucleotide binding;protein binding;RNA binding	Pf00076, Pf08075, Pf13893, Pf14259	0.063	0.131	-3.99	-2.93	1.36487e+08	8.56051e+06	3.16582e+07	4.15648e+06	7	6	6	4	1.276	0	27.01	9
FALSE	High	IsMasterProtein	Q00610	Clathrin heavy chain 1 OS=Homo sapiens GN=CLTC PE=1 SV=5	FALSE	0	40.76	13.3731	16	16	16	1	1675	191.5	5.69	Peak Found	High	High	Peak Found		1213	ENSG00000141367.11	CLTC	17	cell differentiation;cell division;cell organization and biogenesis;cellular component movement;metabolic process;regulation of biological process;response to stimulus;transport	cytoplasm;cytoskeleton;cytosol;endosome;membrane;vacuole	protein binding;RNA binding;structural molecule activity	Pf00637, Pf01394, Pf04053, Pf09268, Pf13838	3.295	0.435	1.72	-1.2	1.87484e+07	6.177e+07	535390	232820	10	12	1	1	0.474	0	7.16	16
FALSE	High	IsMasterProtein	P62081	40S ribosomal protein S7 OS=Homo sapiens GN=RPS7 PE=1 SV=1	FALSE	0	40.171	51.5464	9	17	9	1	194	22.1	10.1	High	High	High	High	Dimethyl [K49; K70; K142; K178; K179]	6201	ENSG00000171863.12	RPS7	2	cell differentiation;cell organization and biogenesis;metabolic process;transport	cytoplasm;cytoskeleton;cytosol;membrane;nucleus;ribosome	protein binding;RNA binding;structural molecule activity	Pf01251	0.408	1.009	-1.29	0.01	1.33522e+08	5.44294e+07	1.3531e+07	1.36474e+07	9	8	2	2	11.328	0	24.21	9
FALSE	High	IsMasterProtein	P08729	Keratin, type II cytoskeletal 7 OS=Homo sapiens GN=KRT7 PE=1 SV=5	TRUE	0	40.092	33.9019	16	22	13	1	469	51.4	5.48	High	Peak Found	High	Peak Found	Dimethyl [K117; K130; K177; K198; K199; K265; K286; K326; K353; K394]	3855	ENSG00000135480.15	KRT7	12	cell death	cytoplasm;cytosol;nucleus	protein binding;structural molecule activity	Pf00038, Pf12128	0.134	0.119	-2.9	-3.07	5.74019e+07	7.68221e+06	7.58679e+07	9.06141e+06	5	4	9	7	2.06	0	11.44	16
FALSE	High	IsMasterProtein	P05141	ADP/ATP translocase 2 OS=Homo sapiens GN=SLC25A5 PE=1 SV=7	FALSE	0	39.883	31.5436	9	19	5	1	298	32.8	9.69	High	High	High	Peak Found	Dimethyl [K23; K92; K199; K245; K295; K296]	292	ENSG00000005022.5	SLC25A5	X	regulation of biological process;transport	membrane;mitochondrion;nucleus	protein binding;RNA binding;transporter activity	Pf00153	0.19	0.128	-2.4	-2.96	2.68998e+08	5.09974e+07	1.1372e+08	1.46125e+07	8	10	5	4	3.16	6	21.57	9
FALSE	High	IsMasterProtein	P05387	60S acidic ribosomal protein P2 OS=Homo sapiens GN=RPLP2 PE=1 SV=1	FALSE	0	39.738	69.5652	4	13	4	1	115	11.7	4.54	High	High	High	High	Dimethyl [K21; K41; K61]	6181	ENSG00000177600.8	RPLP2	11	cell organization and biogenesis;metabolic process;transport	cytosol;membrane;ribosome	protein binding;RNA binding;structural molecule activity	Pf00428	0.394	2.392	-1.34	1.26	2.40386e+08	9.47363e+07	1.61995e+07	3.87487e+07	4	4	1	3	30.623	0	24.69	4
FALSE	High	IsMasterProtein	P30050	60S ribosomal protein L12 OS=Homo sapiens GN=RPL12 PE=1 SV=1	FALSE	0	39.668	54.5455	6	16	6	1	165	17.8	9.42	High	High	High	High	Dimethyl [K31; K83]	6136	ENSG00000197958.12	RPL12	9	cell organization and biogenesis;metabolic process;transport	cytoplasm;cytosol;membrane;nucleus;ribosome	protein binding;RNA binding;structural molecule activity	Pf00298, Pf03946	0.534	1.004	-0.91	0.01	9.89605e+07	5.27982e+07	6.58088e+07	6.60626e+07	6	6	4	4	9	0	23.77	6
FALSE	High	IsMasterProtein	P55795	Heterogeneous nuclear ribonucleoprotein H2 OS=Homo sapiens GN=HNRNPH2 PE=1 SV=1	FALSE	0	39.366	26.7261	9	20	4	1	449	49.2	6.3	High	Not Found	High	Peak Found	Dimethyl [K98; K124; K167]	3188	ENSG00000126945.8	HNRNPH2	X	metabolic process	cytosol;membrane;nucleus	nucleotide binding;protein binding;RNA binding	Pf00076, Pf08080, Pf14259	0.01	0.106	-6.64	-3.24	1.02601e+07		1.17073e+07	1.23741e+06	3		2	2	2.02	0	27.77	9
FALSE	High	IsMasterProtein	P12236	ADP/ATP translocase 3 OS=Homo sapiens GN=SLC25A6 PE=1 SV=4	FALSE	0	39.222	33.557	7	16	3	1	298	32.8	9.74	High	High	High	High	Dimethyl [K23; K92; K245; K295; K296]	293	ENSG00000169100.13	SLC25A6	X|Y; X	cell death;cell organization and biogenesis;regulation of biological process;response to stimulus;transport	membrane;mitochondrion;nucleus	protein binding;transporter activity	Pf00153	0.137	0.11	-2.87	-3.18	31200231	4.27748e+06	38782548	4.28405e+06	2	1	2	2	1.848	0	26.89	7
FALSE	High	IsMasterProtein	O94967-4	Isoform 4 of WD repeat-containing protein 47 OS=Homo sapiens GN=WDR47	FALSE	0	39.064	21.6828	12	14	12	1	927	102.9	6.04	High	Not Found	High	Peak Found	Dimethyl [K297; K336; K580; K603; K636; K656; K875; K885; K896]	22911	ENSG00000085433.15	WDR47	1	development	cytoplasm	protein binding	Pf00400	0.01	0.01	-6.64	-6.64	3.48431e+07		1.25087e+07	114359	10		2	1	0.738	0	14.61	12
FALSE	High	IsMasterProtein	O43175	D-3-phosphoglycerate dehydrogenase OS=Homo sapiens GN=PHGDH PE=1 SV=4	FALSE	0	38.867	27.5797	11	18	11	1	533	56.6	6.71	High	High	High	High	Dimethyl [K8; K38; K364; K380]	26227	ENSG00000092621.11	PHGDH	1	cell differentiation;cell organization and biogenesis;metabolic process;regulation of biological process	cytosol	catalytic activity;nucleotide binding	Pf00389, Pf02826	0.094	0.108	-3.41	-3.21	1.4694e+08	1.37764e+07	6.3042e+07	6.79318e+06	10	7	6	4	2.162	0	14.75	11
FALSE	High	IsMasterProtein	P29692-2	Isoform 2 of Elongation factor 1-delta OS=Homo sapiens GN=EEF1D	FALSE	0	38.756	17.1561	8	16	8	1	647	71.4	6.42	Peak Found	High	Peak Found	High		1936	ENSG00000104529.17; ENSG00000273594.4	EEF1D	8; CHR_HSCHR8_3_CTG7	metabolic process;regulation of biological process;response to stimulus	cytoplasm;cytosol;endoplasmic reticulum;nucleus	DNA binding;protein binding;RNA binding;signal transducer activity	Pf00736, Pf10587	38.792	70.22	5.28	6.13	1.54557e+07	5.99558e+08	1.0448e+07	7.33664e+08	4	7	3	5	0.701	0	25.45	8
FALSE	High	IsMasterProtein	CON_P35527	SWISS-PROT P35527 Tax_Id=9606 Gene_Symbol=KRT9 Keratin, type I cytoskeletal 9	TRUE	0	38.572	23.435	9	15	9	1	623	62.1	5.3	High	High	High	Peak Found	Dimethyl [K184; K212; K224; K242; K271; K390; K472]									0.81	0.266	-0.3	-1.91	1.03886e+08	8.415e+07	4.39567e+07	1.16731e+07	7	6	5	3	1.254	0	16.73	9
FALSE	High	IsMasterProtein	CON_P13645	SWISS-PROT P13645 Tax_Id=9606 Gene_Symbol=KRT10 Keratin, type I cytoskeletal 10	TRUE	0	37.83	24.2833	9	15	9	1	593	59.5	5.21	High	High	High	High	Dimethyl [K177; K343]									1.33	0.888	0.41	-0.17	4.4173e+07	5.87661e+07	4.25227e+07	3.77393e+07	6	9	4	4	1.683	0	10.07	9
FALSE	High	IsMasterProtein	Q09666	Neuroblast differentiation-associated protein AHNAK OS=Homo sapiens GN=AHNAK PE=1 SV=2	FALSE	0	37.803	10.6791	14	21	14	1	5890	628.7	6.15	High	High	High	High	Dimethyl [K371; K387; K2637; K2893; K4926; K6534; K6534; K6543; K6543; K6934; K6934; K8820; K8820; K10886; K10886; K10886; K11553; K11553; K11553; K24903; K24903; K24903; K28356; K28356; K28356; K28365; K28365; K28365]	79026	ENSG00000124942.13	AHNAK	11	cell organization and biogenesis;regulation of biological process	cytoplasm;cytoskeleton;cytosol;membrane;nucleus	protein binding;RNA binding;structural molecule activity		0.451	0.457	-1.15	-1.13	4.18794e+07	1.88908e+07	4.80644e+07	2.19662e+07	5	5	9	9	0.087	0	10.68	14
FALSE	High	IsMasterProtein	P07195	L-lactate dehydrogenase B chain OS=Homo sapiens GN=LDHB PE=1 SV=2	FALSE	0	37.784	31.4371	9	12	9	1	334	36.6	6.05	High	Peak Found	High	Peak Found	Dimethyl [K43; K58; K60; K127; K244; K308; K310; K318; K329]	3945	ENSG00000111716.12	LDHB	12	metabolic process	cytoplasm;cytosol;membrane;mitochondrion	catalytic activity;nucleotide binding;protein binding	Pf00056, Pf02866	0.179	0.125	-2.49	-3.01	2.3485e+07	4.19209e+06	8.94745e+06	1.11425e+06	5	4	3	1	1.994	0	10.53	9
FALSE	High	IsMasterProtein	P31689	DnaJ homolog subfamily A member 1 OS=Homo sapiens GN=DNAJA1 PE=1 SV=2	FALSE	0	37.426	28.2116	7	12	7	1	397	44.8	7.08	High	Peak Found	High	Peak Found	Dimethyl [K246; K296; K338; K344]	3301	ENSG00000086061.15	DNAJA1	9	cellular component movement;metabolic process;regulation of biological process;response to stimulus;transport	cytoplasm;cytoskeleton;cytosol;endoplasmic reticulum;membrane;mitochondrion;nucleus	enzyme regulator activity;metal ion binding;nucleotide binding;protein binding	Pf00226, Pf00684, Pf01556	0.087	0.085	-3.52	-3.56	4.05196e+07	3.5435e+06	82293434	6.95453e+06	4	3	6	4	1.081	0	26.62	7
FALSE	High	IsMasterProtein	P78527	DNA-dependent protein kinase catalytic subunit OS=Homo sapiens GN=PRKDC PE=1 SV=3	FALSE	0	36.822	4.65116	13	14	13	1	4128	468.8	7.12	High	Peak Found	High	Peak Found	Dimethyl [K124; K133; K254; K902; K1292; K1627; K2683; K2818; K2950; K3825; K4070]	5591	ENSG00000253729.7	PRKDC	8	cell death;cell differentiation;cell organization and biogenesis;cell proliferation;metabolic process;regulation of biological process;response to stimulus	cytosol;membrane;nucleus	catalytic activity;DNA binding;nucleotide binding;protein binding;RNA binding	Pf00454, Pf02259, Pf02260, Pf08163	0.034	0.063	-4.87	-3.98	5.24651e+06	178847	2.13788e+07	1.35447e+06	5	1	7	3	0.124	0	13.81	13
FALSE	High	IsMasterProtein	P14649	Myosin light chain 6B OS=Homo sapiens GN=MYL6B PE=1 SV=1	FALSE	0	36.692	50	8	20	6	1	208	22.8	5.73	High	High	Not Found	High	Dimethyl [K107]	140465	ENSG00000196465.10	MYL6B	12	cellular component movement	cytosol	catalytic activity;metal ion binding;motor activity;protein binding;structural molecule activity	Pf13405, Pf13499	8.738		3.13		1.58422e+07	138431567			4	5			7.483	0	21.52	8
FALSE	High	IsMasterProtein	Q92614	Unconventional myosin-XVIIIa OS=Homo sapiens GN=MYO18A PE=1 SV=3	FALSE	0	36.662	9.44499	14	18	14	1	2054	233	6.3	Peak Found	High	Peak Found	High		399687	ENSG00000196535.15	MYO18A	17	cell differentiation;cell organization and biogenesis;cellular component movement;metabolic process;regulation of biological process;transport	cell surface;cytoplasm;cytoskeleton;Golgi;membrane	catalytic activity;DNA binding;motor activity;nucleotide binding;protein binding;RNA binding;structural molecule activity;transporter activity	Pf00038, Pf00063, Pf00595, Pf00769, Pf01496, Pf01576, Pf02463, Pf02841, Pf03962, Pf04111, Pf04156, Pf04502, Pf04615, Pf05483, Pf05557, Pf05622, Pf05701, Pf05911, Pf06008, Pf06160, Pf06785, Pf06818, Pf07111, Pf07888, Pf08286, Pf09726, Pf09728, Pf09731, Pf09789, Pf10174, Pf12128, Pf12252, Pf12718, Pf13514, Pf13851, Pf14643, Pf14662, Pf14992, Pf15066, Pf15070, Pf15397	55.003	4.367	5.78	2.13	442369	2.43318e+07	1.78494e+06	7.79449e+06	2	13	3	4	0.265	0	12.43	14
FALSE	High	IsMasterProtein	Q9GZZ1	N-alpha-acetyltransferase 50 OS=Homo sapiens GN=NAA50 PE=1 SV=1	FALSE	0	36.317	43.787	7	16	7	1	169	19.4	8.81	High	High	High	High	Dimethyl [K17; K37; K47; K102; K152; K155; K166]	80218	ENSG00000121579.12	NAA50	3	cell organization and biogenesis;metabolic process	cytoplasm;nucleus	catalytic activity;protein binding	Pf00583, Pf13420, Pf13508, Pf13527, Pf13673	0.815	1.453	-0.29	0.54	5.80961e+07	4.73631e+07	2.68705e+07	3.90503e+07	7	6	1	2	9	0	7.3	7
FALSE	High	IsMasterProtein	P23528	Cofilin-1 OS=Homo sapiens GN=CFL1 PE=1 SV=3	FALSE	0	36.145	52.4096	7	13	4	1	166	18.5	8.09	High	High	High	Peak Found	Dimethyl [K53; K73; K92; K96; K112; K164]	1072	ENSG00000172757.12	CFL1	11	cell organization and biogenesis;regulation of biological process;response to stimulus;transport	cytoplasm;cytoskeleton;membrane;nucleus	protein binding	Pf00241	0.907	0.493	-0.14	-1.02	5.48451e+07	4.97511e+07	9.9141e+07	4.88827e+07	5	6	3	3	5.813	3	27.32	7
FALSE	High	IsMasterProtein	P24534	Elongation factor 1-beta OS=Homo sapiens GN=EEF1B2 PE=1 SV=3	FALSE	0	36.109	44.4444	7	27	7	1	225	24.7	4.67	High	High	Peak Found	High	Dimethyl [K176]	1933	ENSG00000283391.1; ENSG00000114942.13	EEF1B2	2; CHR_HSCHR2_6_CTG7_2	metabolic process;response to stimulus	cytoplasm;cytosol;endoplasmic reticulum;nucleus	protein binding;RNA binding	Pf00736, Pf14497	62.024	75.812	5.95	6.24	1.11625e+07	6.92346e+08	7.33581e+06	5.56144e+08	3	5	4	8	3.642	0	30.02	7
FALSE	High	IsMasterProtein	P49454	Centromere protein F OS=Homo sapiens GN=CENPF PE=1 SV=2	FALSE	0	35.165	5.23364	14	14	14	1	3210	367.5	5.07	Not Found	Not Found	High	Peak Found	Dimethyl [K942; K1019; K1022; K1675; K1917; K2589; K2624; K2636; K2664; K2697; K2771; K2772; K2921]	1063		CENPF	1	cell differentiation;cell division;cell organization and biogenesis;cell proliferation;development;metabolic process;regulation of biological process;response to stimulus;transport	chromosome;cytoplasm;cytoskeleton;cytosol;nucleus	catalytic activity;motor activity;protein binding;transporter activity	Pf01496, Pf01576, Pf02463, Pf04111, Pf04156, Pf05557, Pf06160, Pf07888, Pf09726, Pf10473, Pf10481, Pf10490, Pf12128, Pf13166		0.01		-6.64			2.82515e+07	48368.1			9	1	0.144	0	2.23	14
FALSE	High	IsMasterProtein	P12956	X-ray repair cross-complementing protein 6 OS=Homo sapiens GN=XRCC6 PE=1 SV=2	FALSE	0	35.093	25.9442	10	15	10	1	609	69.8	6.64	High	High	High	High	Dimethyl [K46; K206; K510]	2547	ENSG00000196419.12	XRCC6	22	cell organization and biogenesis;metabolic process;regulation of biological process;response to stimulus;transport	chromosome;cytoplasm;cytosol;extracellular;membrane;nucleus;organelle lumen	catalytic activity;DNA binding;nucleotide binding;protein binding;RNA binding	Pf02037, Pf02735, Pf03730, Pf03731	5.518	2.383	2.46	1.25	9.87011e+06	5.4468e+07	214245	510643	8	10	1	1	1.113	0	10.27	10
FALSE	High	IsMasterProtein	P16989	Y-box-binding protein 3 OS=Homo sapiens GN=YBX3 PE=1 SV=4	FALSE	0	35.069	22.8495	7	16	2	1	372	40.1	9.77	High	Peak Found	Not Found	Not Found	Dimethyl [K113; K124; K150; K268]	8531	ENSG00000060138.12	CSDA; YBX3	12	metabolic process;regulation of biological process;response to stimulus	cytoplasm;cytosol;nucleus	DNA binding;protein binding;RNA binding	Pf00313	0.355	0.709	-1.49	-0.5	1.43145e+08	5.08327e+07	3.14479e+07	2.22871e+07	7	7	3	3	2.981	6	10.97	7
FALSE	High	IsMasterProtein	Q6FI13	Histone H2A type 2-A OS=Homo sapiens GN=HIST2H2AA3 PE=1 SV=3	FALSE	0	35.016	52.3077	4	14	3	1	130	14.1	10.9	High	High	High	High	Dimethyl [K119]	723790; 8337	ENSG00000203812.2; ENSG00000272196.2	HIST2H2AA4; HIST2H2AA3	1	regulation of biological process	chromosome;nucleus	DNA binding;protein binding	Pf00125, Pf00808	1.378	4.199	0.46	2.07	1.24702e+08	1.71894e+08	6.62855e+07	2.78326e+08	2	2	2	3	18.307	1	31.18	4
FALSE	High	IsMasterProtein	O15144	Actin-related protein 2/3 complex subunit 2 OS=Homo sapiens GN=ARPC2 PE=1 SV=1	FALSE	0	34.938	46.3333	11	15	11	1	300	34.3	7.36	High	High	Peak Found	High	Dimethyl [K106; K127]	10109	ENSG00000163466.15	ARPC2	2	cell organization and biogenesis;cellular component movement;regulation of biological process;response to stimulus	cytoplasm;cytoskeleton;cytosol;endosome;membrane	protein binding;structural molecule activity	Pf04045	2.794	3.595	1.48	1.85	3.29227e+07	9.19737e+07	6.34025e+06	2.27963e+07	8	9	1	3	3.062	0	13.38	11
FALSE	High	IsMasterProtein	P62910	60S ribosomal protein L32 OS=Homo sapiens GN=RPL32 PE=1 SV=2	FALSE	0	34.799	29.6296	4	9	4	1	135	15.9	11.33	High	Peak Found	High	High	Dimethyl [K50; K64; K65; K93; K106]	6161	ENSG00000144713.12	RPL32	3	cell organization and biogenesis;metabolic process;response to stimulus;transport	cytosol;membrane;ribosome	RNA binding;structural molecule activity	Pf01655	0.624	1.1	-0.68	0.14	2.35171e+07	1.46689e+07	4.31421e+07	4.7475e+07	1	1	3	4	9	0	18.93	4
FALSE	High	IsMasterProtein	P62701	40S ribosomal protein S4, X isoform OS=Homo sapiens GN=RPS4X PE=1 SV=2	FALSE	0	34.76	31.5589	6	13	6	1	263	29.6	10.15	High	High	High	Peak Found	Dimethyl [K37; K94; K168; K230]	6191	ENSG00000198034.10	RPS4X	X	cell organization and biogenesis;development;metabolic process;regulation of biological process;transport	cytoplasm;cytosol;membrane;ribosome	protein binding;RNA binding;structural molecule activity	Pf00900, Pf08071	0.562	0.766	-0.83	-0.38	8.53444e+07	4.79857e+07	5.55766e+07	4.25762e+07	7	7	4	4	2.981	0	12.23	6
FALSE	High	IsMasterProtein	P16104	Histone H2AX OS=Homo sapiens GN=H2AFX PE=1 SV=2	FALSE	0	34.131	42.6573	3	7	2	1	143	15.1	10.74	High	High	Not Found	Not Found	Dimethyl [K119]	3014	ENSG00000188486.3	H2AFX	11	cell organization and biogenesis;metabolic process;regulation of biological process;response to stimulus	chromosome;nucleus	DNA binding;protein binding	Pf00125, Pf00808	1.101		0.14		4.67188e+06	5.14419e+06			3	3			3.642	0	22.74	3
FALSE	High	IsMasterProtein	Q15818	Neuronal pentraxin-1 OS=Homo sapiens GN=NPTX1 PE=2 SV=2	FALSE	0	33.734	29.6296	8	17	8	1	432	47.1	6.55	High	Peak Found	High	Peak Found	Dimethyl [K141; K227; K311; K385; K400; K422]	4884	ENSG00000171246.5	NPTX1	17	cell communication;cell organization and biogenesis;transport		metal ion binding	Pf00354, Pf13385	0.024	0.03	-5.4	-5.06	1.79747e+08	4.25432e+06	1.2404e+08	3.72189e+06	6	2	7	1	0.978	0	33.35	8
FALSE	High	IsMasterProtein	O14979	Heterogeneous nuclear ribonucleoprotein D-like OS=Homo sapiens GN=HNRNPDL PE=1 SV=3	FALSE	0	33.455	23.8095	8	14	6	1	420	46.4	9.57	High	High	Not Found	Not Found	Dimethyl [K161; K197; K204; K209; K250; K269; K288; K289]	9987	ENSG00000152795.17	HNRNPDL; HNRPDL	4	metabolic process;regulation of biological process	cytoplasm;nucleus;spliceosomal complex	DNA binding;nucleotide binding;protein binding;RNA binding	Pf00076, Pf08777, Pf13893, Pf14259	0.845	0.882	-0.24	-0.18	7.28075e+07	6.15272e+07	1.03226e+07	9.10209e+06	5	6	1	1	1.873	2	17.53	8
FALSE	High	IsMasterProtein	P62829	60S ribosomal protein L23 OS=Homo sapiens GN=RPL23 PE=1 SV=1	FALSE	0	33.302	45.7143	6	19	6	1	140	14.9	10.51	High	High	High	High	Dimethyl [K35; K43; K66; K123]	9349	ENSG00000125691.12	RPL23	17	cell organization and biogenesis;metabolic process;transport	cytosol;membrane;ribosome	protein binding;RNA binding;structural molecule activity	Pf00238	0.396	0.683	-1.34	-0.55	1.27822e+08	5.05901e+07	7.45625e+07	5.08913e+07	7	7	5	5	14.849	0	17.24	6
FALSE	High	IsMasterProtein	CON_Q2UVX4	SWISS-PROT Q2UVX4 (Bos taurus) Complement C3 precursor	TRUE	0	33.249	5.95668	7	13	7	1	1662	187.2	6.84	High	High	Peak Found	High	Dimethyl [K358]									3.241	3.702	1.7	1.89	2.24443e+07	7.27379e+07	2.10589e+07	77950501	4	5	4	4	0.233	0	14.39	7
FALSE	High	IsMasterProtein	P61247	40S ribosomal protein S3a OS=Homo sapiens GN=RPS3A PE=1 SV=2	FALSE	0	33.155	34.4697	8	16	8	1	264	29.9	9.73	High	High	High	High	Dimethyl [K94; K182; K187; K195; K199; K240]	6189	ENSG00000145425.9	RPS3A	4	cell differentiation;cell organization and biogenesis;metabolic process;regulation of biological process;transport	cytoplasm;cytosol;endoplasmic reticulum;nucleus;ribosome	protein binding;RNA binding;structural molecule activity	Pf01015	0.477	1.208	-1.07	0.27	1.60765e+08	7.66451e+07	5.27978e+07	6.37553e+07	7	7	4	5	3.281	0	19.22	8
FALSE	High	IsMasterProtein	Q5QNW6-2	Isoform 2 of Histone H2B type 2-F OS=Homo sapiens GN=HIST2H2BF	FALSE	0	32.485	33.5821	5	17	5	1	134	14.8	10.35	High	High	High	High	Dimethyl [K35; K44; K58; K109]	440689	ENSG00000203814.6	HIST2H2BF	1	cell organization and biogenesis	chromosome;cytosol;nucleus	DNA binding;protein binding	Pf00125, Pf00808	1.444	3.739	0.53	1.9	1.6531e+08	2.38661e+08	6.13469e+07	2.29406e+08	5	5	5	5	5.813	0	30.62	5
FALSE	High	IsMasterProtein	P62873	Guanine nucleotide-binding protein G(I)/G(S)/G(T) subunit beta-1 OS=Homo sapiens GN=GNB1 PE=1 SV=3	FALSE	0	31.97	27.9412	7	9	4	1	340	37.4	6	High	Peak Found	Not Found	Not Found	Dimethyl [K23; K89; K209; K301; K337]	2782	ENSG00000078369.17	GNB1	1	cell death;cell organization and biogenesis;cell proliferation;cellular homeostasis;metabolic process;regulation of biological process;response to stimulus	cytosol;membrane	catalytic activity;protein binding;signal transducer activity	Pf00400	0.378		-1.4		5.42906e+07	2.05134e+07			7	6			2.981	3	13.25	7
FALSE	High	IsMasterProtein	P62753	40S ribosomal protein S6 OS=Homo sapiens GN=RPS6 PE=1 SV=1	FALSE	0	31.956	27.7108	6	12	6	1	249	28.7	10.84	High	High	High	High	Dimethyl [K14; K46; K115]	6194	ENSG00000137154.12	RPS6	9	cell death;cell differentiation;cell organization and biogenesis;cell proliferation;metabolic process;regulation of biological process;response to stimulus;transport	cytoplasm;cytosol;membrane;nucleus;ribosome	protein binding;RNA binding;structural molecule activity	Pf01092	0.454	0.714	-1.14	-0.49	7.53114e+07	3.41963e+07	6.26692e+07	4.47526e+07	4	5	5	5	4.878	0	14.99	6
FALSE	High	IsMasterProtein	Q92804	TATA-binding protein-associated factor 2N OS=Homo sapiens GN=TAF15 PE=1 SV=1	FALSE	0	31.177	11.3176	5	13	3	1	592	61.8	8.02	High	High	Not Found	Not Found	Dimethyl [K297; K306; K314]	8148	ENSG00000270647.5; ENSG00000276833.2	TAF15	17; CHR_HSCHR17_7_CTG4	regulation of biological process	cytoplasm;nucleus	DNA binding;metal ion binding;nucleotide binding;protein binding;RNA binding	Pf00076, Pf00641, Pf13893, Pf14259	0.201		-2.32		2.91187e+08	5.84305e+07			4	4			0.679	0	16.49	5
FALSE	High	IsMasterProtein	Q6NZI2	Polymerase I and transcript release factor OS=Homo sapiens GN=PTRF PE=1 SV=1	FALSE	0	30.599	30.2564	7	12	7	1	390	43.5	5.6	High	Peak Found	High	Peak Found	Dimethyl [K45; K60; K95; K161; K165]	284119	ENSG00000177469.12	PTRF	17	metabolic process;regulation of biological process	cytoplasm;cytosol;endoplasmic reticulum;membrane;mitochondrion;nucleus	protein binding;RNA binding	Pf15237	0.024	0.028	-5.37	-5.16	6.37878e+07	1.543e+06	47987998	1.34592e+06	4	2	4	1	1.448	0	22.83	7
FALSE	High	IsMasterProtein	P61978-2	Isoform 2 of Heterogeneous nuclear ribonucleoprotein K OS=Homo sapiens GN=HNRNPK	FALSE	0	30.437	13.1466	4	13	4	1	464	51	5.33	High	High	High	High	Dimethyl [K102; K103; K219; K405; K456]	3190	ENSG00000165119.20	HNRNPK	9	metabolic process;regulation of biological process;response to stimulus	cytoplasm;membrane;nucleus;spliceosomal complex	DNA binding;protein binding;RNA binding	Pf00013, Pf08067, Pf13014, Pf13083	1.135	0.727	0.18	-0.46	1.62922e+07	1.84869e+07	3.32029e+07	2.41415e+07	2	3	4	4	0.848	0	11.12	4
FALSE	High	IsMasterProtein	Q99729-2	Isoform 2 of Heterogeneous nuclear ribonucleoprotein A/B OS=Homo sapiens GN=HNRNPAB	FALSE	0	30.386	24.0964	8	13	7	1	332	35.9	6.95	High	High	High	High	Dimethyl [K119; K169; K190]	3182	ENSG00000197451.11	HNRNPAB	5	cell organization and biogenesis;regulation of biological process	cytoplasm;nucleus	DNA binding;nucleotide binding;protein binding;RNA binding	Pf00076, Pf08143, Pf13893, Pf14259	1.037	1.293	0.05	0.37	5.13249e+07	5.32382e+07	2.93923e+07	3.80159e+07	3	3	4	5	6.017	0	9.76	8
FALSE	High	IsMasterProtein	P62750	60S ribosomal protein L23a OS=Homo sapiens GN=RPL23A PE=1 SV=1	FALSE	0	30.368	42.9487	8	18	8	1	156	17.7	10.45	High	High	High	High	Dimethyl [K78; K88; K89; K103; K115; K123; K134; K135; K152]	6147	ENSG00000198242.13	RPL23A	17	cell organization and biogenesis;cell proliferation;metabolic process;transport	cytoplasm;cytosol;nucleus;ribosome	nucleotide binding;protein binding;RNA binding;structural molecule activity	Pf00276, Pf03939	0.499	1.214	-1	0.28	3.15878e+08	1.57641e+08	1.0714e+08	1.30095e+08	8	8	6	6	34.938	0	4.55	8
FALSE	High	IsMasterProtein	P08708	40S ribosomal protein S17 OS=Homo sapiens GN=RPS17 PE=1 SV=2	FALSE	0	30.264	48.8889	4	11	4	1	135	15.5	9.85	High	High	High	High	Dimethyl [K44; K45; K103; K129]	6218	ENSG00000278229.2; ENSG00000182774.10	RPS17; RPS17L	15; CHR_HSCHR15_5_CTG8	cell organization and biogenesis;metabolic process;transport	cytosol;membrane;ribosome	RNA binding;structural molecule activity	Pf00833	0.596	1.505	-0.75	0.59	9.41671e+07	5.61475e+07	2.50301e+07	3.76718e+07	3	4	3	4	13.678	0	26.82	4
FALSE	High	IsMasterProtein	P83731	60S ribosomal protein L24 OS=Homo sapiens GN=RPL24 PE=1 SV=1	FALSE	0	29.822	31.8471	6	16	6	1	157	17.8	11.25	High	High	High	High	Dimethyl [K2; K12; K35; K93]	6152	ENSG00000114391.12	RPL24	3	cell organization and biogenesis;cellular component movement;metabolic process;regulation of biological process;transport	cytoplasm;cytosol;membrane;ribosome	protein binding;RNA binding;structural molecule activity	Pf01246	0.468	0.956	-1.1	-0.07	2.09415e+08	9.79093e+07	7.07195e+07	6.75777e+07	3	4	2	3	6.943	0	21.23	6
FALSE	High	IsMasterProtein	P51991	Heterogeneous nuclear ribonucleoprotein A3 OS=Homo sapiens GN=HNRNPA3 PE=1 SV=2	FALSE	0	29.784	26.7196	8	13	8	1	378	39.6	9.01	High	High	High	High	Dimethyl [K57; K99; K134; K151; K182]	220988	ENSG00000170144.20	HNRNPA3	2	metabolic process;transport	cytoplasm;nucleus;spliceosomal complex	nucleotide binding;protein binding;RNA binding;transporter activity	Pf00076, Pf13893, Pf14259	1.607	1.165	0.68	0.22	1.24958e+08	2.00816e+08	3.27433e+07	3.81585e+07	7	7	4	4	2.548	0	7.29	8
FALSE	High	IsMasterProtein	P62277	40S ribosomal protein S13 OS=Homo sapiens GN=RPS13 PE=1 SV=2	FALSE	0	29.699	31.1258	7	13	7	1	151	17.2	10.54	High	High	High	High	Dimethyl [K43; K93; K94]	6207	ENSG00000110700.6	RPS13	11	cell organization and biogenesis;metabolic process;regulation of biological process;transport	cytosol;membrane;nucleus;ribosome	protein binding;RNA binding;structural molecule activity	Pf00312, Pf08069	0.654	0.852	-0.61	-0.23	1.43126e+08	9.36285e+07	9.03951e+07	7.69952e+07	5	5	5	5	7.111	0	19.22	7
FALSE	High	IsMasterProtein	P62879	Guanine nucleotide-binding protein G(I)/G(S)/G(T) subunit beta-2 OS=Homo sapiens GN=GNB2 PE=1 SV=3	FALSE	0	29.287	31.7647	7	8	3	1	340	37.3	6	High	High	Not Found	Not Found	Dimethyl [K23; K89; K301; K337]	2783	ENSG00000172354.9	GNB2	7	metabolic process;regulation of biological process;response to stimulus	cytoplasm;cytosol;membrane	catalytic activity;protein binding;signal transducer activity	Pf00400	0.397		-1.33		4.60921e+07	1.83132e+07			3	3			2.162	1	11.72	7
FALSE	High	IsMasterProtein	Q00341	Vigilin OS=Homo sapiens GN=HDLBP PE=1 SV=2	FALSE	0	29.268	14.3533	13	16	13	1	1268	141.4	6.87	Peak Found	High	Peak Found	High		3069		HDLBP	2	metabolic process;transport	cytoplasm;cytosol;membrane;nucleus	protein binding;RNA binding	Pf00013, Pf13014, Pf14611	0.137	65.863	-2.86	6.04	233953400	3.21185e+07	270524	1.78175e+07	1	10	2	6	0.447	0	7.38	13
FALSE	High	IsMasterProtein	P17987	T-complex protein 1 subunit alpha OS=Homo sapiens GN=TCP1 PE=1 SV=1	FALSE	0	29.182	19.0647	6	8	6	1	556	60.3	6.11	High	Peak Found	High	Peak Found	Dimethyl [K33; K63; K365; K466; K510]	6950	ENSG00000120438.11	TCP1	6	cell organization and biogenesis;metabolic process;regulation of biological process;transport	cytoplasm;cytoskeleton;cytosol;Golgi	nucleotide binding;protein binding;RNA binding	Pf00118	0.137	0.152	-2.87	-2.72	2.58362e+07	3.53456e+06	5.15814e+06	784502	4	3	2	2	0.565	0	15.25	6
FALSE	High	IsMasterProtein	Q92841	Probable ATP-dependent RNA helicase DDX17 OS=Homo sapiens GN=DDX17 PE=1 SV=2	FALSE	0	29.163	11.9342	7	15	3	1	729	80.2	8.27	High	Peak Found	High	Peak Found	Dimethyl [K361; K528]	10521	ENSG00000100201.20	DDX17	22	defense response;metabolic process;regulation of biological process;response to stimulus	cytoplasm;membrane;nucleus	catalytic activity;nucleotide binding;protein binding;RNA binding	Pf00270, Pf00271	0.187	0.218	-2.42	-2.2	13002820	2.43719e+06	1.01894e+07	2.22019e+06	3	2	2	2	0.778	0	14.89	7
FALSE	High	IsMasterProtein	P50914	60S ribosomal protein L14 OS=Homo sapiens GN=RPL14 PE=1 SV=4	FALSE	0	28.663	20.9302	4	13	4	1	215	23.4	10.93	High	High	High	High	Dimethyl [K23; K63]	9045	ENSG00000188846.13	RPL14	3	cell organization and biogenesis;metabolic process;transport	cytosol;membrane;ribosome	protein binding;RNA binding;structural molecule activity	Pf01929	0.874	0.828	-0.19	-0.27	7.79156e+07	6.81097e+07	1.07044e+08	8.85853e+07	3	4	3	3	3.642	0	22.64	4
FALSE	High	IsMasterProtein	Q9UBI6	Guanine nucleotide-binding protein G(I)/G(S)/G(O) subunit gamma-12 OS=Homo sapiens GN=GNG12 PE=1 SV=3	FALSE	0	28.63	45.8333	3	8	3	1	72	8	8.97	High	High	High	Not Found	Dimethyl [K64; K66; K67]	55970	ENSG00000172380.5	GNG12	1	regulation of biological process;response to stimulus	membrane	protein binding;signal transducer activity	Pf00631	0.564		-0.83		1.46185e+08	8.24014e+07			3	3			24.119	0	9.56	3
FALSE	High	IsMasterProtein	P49411	Elongation factor Tu, mitochondrial OS=Homo sapiens GN=TUFM PE=1 SV=2	FALSE	0	27.708	19.9115	5	9	5	1	452	49.5	7.61	High	High	High	High	Dimethyl [K256; K361; K447]	7284		TUFM	16	metabolic process;response to stimulus	membrane;mitochondrion	catalytic activity;nucleotide binding;protein binding;RNA binding	Pf00009, Pf03143, Pf03144	0.094	0.083	-3.42	-3.59	4.6616e+07	4.35902e+06	3.60473e+07	2.99319e+06	3	3	3	3	0.54	0	16.64	5
FALSE	High	IsMasterProtein	Q9H0H5	Rac GTPase-activating protein 1 OS=Homo sapiens GN=RACGAP1 PE=1 SV=1	FALSE	0	27.555	25.1582	11	12	11	1	632	71	8.88	Peak Found	High	Peak Found	High		29127	ENSG00000161800.12	RACGAP1	12	cell differentiation;cell division;cell organization and biogenesis;cell proliferation;cellular component movement;development;metabolic process;regulation of biological process;response to stimulus;transport	cytoplasm;cytoskeleton;cytosol;endosome;membrane;nucleus	catalytic activity;enzyme regulator activity;metal ion binding;nucleotide binding;protein binding	Pf00130, Pf00620, Pf07888	19.128	27.226	4.26	4.77	400840	7.66734e+06	1.59721e+06	4.34863e+07	1	2	4	8	1.031	0	6.31	11
FALSE	High	IsMasterProtein	Q9Y281	Cofilin-2 OS=Homo sapiens GN=CFL2 PE=1 SV=1	FALSE	0	27.09	30.7229	4	8	1	1	166	18.7	7.88	Peak Found	High	High	Peak Found	Dimethyl [K73; K92; K96; K112]	1073	ENSG00000165410.14	CFL2	14	cell organization and biogenesis;cellular homeostasis;regulation of biological process	cytoplasm;cytoskeleton;nucleus	protein binding	Pf00241	2.554	0.984	1.35	-0.02	1.91528e+06	4.89222e+06	2.24005e+06	2.20508e+06	1	1	1	1	1.894	0	22.34	4
FALSE	High	IsMasterProtein	Q92499	ATP-dependent RNA helicase DDX1 OS=Homo sapiens GN=DDX1 PE=1 SV=2	FALSE	0	27.022	17.8378	8	10	8	1	740	82.4	7.23	High	Peak Found	High	Peak Found	Dimethyl [K234; K307; K490; K596; K720]	1653	ENSG00000079785.14	DDX1	2	cell organization and biogenesis;development;metabolic process;regulation of biological process;response to stimulus	cytoplasm;cytosol;membrane;nucleus	catalytic activity;DNA binding;nucleotide binding;protein binding;RNA binding	Pf00270, Pf00271, Pf00622	0.185	0.346	-2.44	-1.53	1.1906e+07	2.19675e+06	7.39003e+06	2.55902e+06	4	3	3	2	0.48	0	7.75	8
FALSE	High	IsMasterProtein	Q12906-7	Isoform 7 of Interleukin enhancer-binding factor 3 OS=Homo sapiens GN=ILF3	FALSE	0	26.743	10.8018	7	13	7	1	898	95.7	8.81	High	High	High	High	Dimethyl [K342; K591; K604]	3609	ENSG00000129351.17	ILF3	19	defense response;metabolic process;regulation of biological process;response to stimulus	cytoplasm;membrane;mitochondrion;nucleus	DNA binding;protein binding;RNA binding	Pf00035, Pf07528, Pf14709	0.574	0.969	-0.8	-0.05	4.27213e+07	2.45032e+07	9.65152e+06	9.3503e+06	6	6	3	3	0.65	0	4.67	7
FALSE	High	IsMasterProtein	O60506	Heterogeneous nuclear ribonucleoprotein Q OS=Homo sapiens GN=SYNCRIP PE=1 SV=2	FALSE	0	26.668	20.3852	10	12	5	1	623	69.6	8.59	High	High	High	High	Dimethyl [K66; K81; K100; K184; K297; K356]	10492	ENSG00000135316.17	SYNCRIP	6	cell differentiation;metabolic process;regulation of biological process;response to stimulus	cytoplasm;endoplasmic reticulum;membrane;nucleus;spliceosomal complex	nucleotide binding;protein binding;RNA binding	Pf00076, Pf13893, Pf14259	1.065	1.189	0.09	0.25	2.54794e+07	2.71297e+07	1.01428e+07	1.20637e+07	5	5	3	4	0.995	5	7.84	10
FALSE	High	IsMasterProtein	P62937	Peptidyl-prolyl cis-trans isomerase A OS=Homo sapiens GN=PPIA PE=1 SV=2	FALSE	0	26.65	55.7576	9	13	9	1	165	18	7.81	High	High	High	High	Dimethyl [K82; K91; K118]	5478	ENSG00000196262.13	PPIA	7	cell organization and biogenesis;cellular component movement;metabolic process;regulation of biological process;transport	cytoplasm;cytosol;extracellular;membrane;nucleus;organelle lumen	catalytic activity;protein binding;RNA binding	Pf00160	0.776	1.448	-0.37	0.53	9.78423e+07	7.58889e+07	5.18929e+07	7.51179e+07	6	6	5	5	4.179	0	5.74	9
FALSE	High	IsMasterProtein	P25398	40S ribosomal protein S12 OS=Homo sapiens GN=RPS12 PE=1 SV=3	FALSE	0	26.509	46.2121	5	14	5	1	132	14.5	7.21	High	High	High	High	Dimethyl [K63; K78; K93; K102; K112; K129]	6206	ENSG00000112306.7	RPS12	6	cell organization and biogenesis;metabolic process;transport	cytoplasm;cytosol;membrane;ribosome	RNA binding;structural molecule activity	Pf01248	0.286	0.271	-1.81	-1.89	1.24522e+08	3.556e+07	1.09032e+08	2.95104e+07	4	4	5	5	9	0	20.6	5
FALSE	High	IsMasterProtein	P62847-4	Isoform 4 of 40S ribosomal protein S24 OS=Homo sapiens GN=RPS24	FALSE	0	26.405	13.1488	3	12	3	1	289	32.4	10.15	High	High	High	High	Dimethyl [K32; K83]	6229	ENSG00000138326.18	RPS24	10	cell organization and biogenesis;metabolic process;transport	cytosol;membrane;nucleus;ribosome	nucleotide binding;protein binding;RNA binding;structural molecule activity	Pf01282	0.518	0.658	-0.95	-0.6	1.12845e+08	5.84522e+07	5.34251e+07	3.5164e+07	4	4	4	4	2.728	0	9.82	3
FALSE	High	IsMasterProtein	O95235	Kinesin-like protein KIF20A OS=Homo sapiens GN=KIF20A PE=1 SV=1	FALSE	0	26.351	16.2921	9	9	9	1	890	100.2	6.92	Not Found	Not Found	Peak Found	High		10112	ENSG00000112984.11	KIF20A	5	cell organization and biogenesis;cellular component movement;transport	cytoplasm;cytoskeleton;Golgi	catalytic activity;motor activity;nucleotide binding;protein binding;transporter activity	Pf00225		6.034		2.59			5.29452e+06	3.19495e+07			2	6	0.468	0	13.58	9
FALSE	High	IsMasterProtein	P18124	60S ribosomal protein L7 OS=Homo sapiens GN=RPL7 PE=1 SV=1	FALSE	0	26.325	34.6774	9	12	9	1	248	29.2	10.65	High	High	High	High	Dimethyl [K19; K20; K148; K199; K202; K212; K223]	6129	ENSG00000147604.13	RPL7	8	cell organization and biogenesis;metabolic process;transport	cytoplasm;cytosol;membrane;nucleus;ribosome	DNA binding;protein binding;RNA binding;structural molecule activity	Pf00327, Pf08079	0.68	0.993	-0.56	-0.01	2.38609e+07	1.62316e+07	5.31201e+07	5.27482e+07	5	5	5	5	3.217	0	8.12	9
FALSE	High	IsMasterProtein	Q96C19	EF-hand domain-containing protein D2 OS=Homo sapiens GN=EFHD2 PE=1 SV=1	FALSE	0	26.106	47.0833	8	13	6	1	240	26.7	5.2	Peak Found	High	Peak Found	High	Dimethyl [K118]	79180	ENSG00000142634.12	EFHD2	1		membrane	metal ion binding;protein binding		6.168	2.035	2.62	1.02	1.5266e+07	9.41653e+07	2.44477e+07	4.97423e+07	3	6	3	4	2.384	3	12.69	8
FALSE	High	IsMasterProtein	P62249	40S ribosomal protein S16 OS=Homo sapiens GN=RPS16 PE=1 SV=2	FALSE	0	25.792	43.8356	7	16	7	1	146	16.4	10.21	High	High	High	High	Dimethyl [K60; K109]	6217	ENSG00000105193.8	RPS16	19	cell organization and biogenesis;metabolic process;transport	cytosol;membrane;ribosome	protein binding;RNA binding;structural molecule activity	Pf00380	0.327	0.379	-1.61	-1.4	2.27966e+08	7.45463e+07	1.29899e+08	4.92277e+07	7	7	5	5	5.813	0	16.6	7
FALSE	High	IsMasterProtein	P62241	40S ribosomal protein S8 OS=Homo sapiens GN=RPS8 PE=1 SV=2	FALSE	0	25.644	41.8269	7	14	7	1	208	24.2	10.32	High	High	High	High	Dimethyl [K139]	6202	ENSG00000142937.11	RPS8	1	cell organization and biogenesis;metabolic process;transport	cytoplasm;cytosol;endoplasmic reticulum;membrane;nucleus;ribosome	protein binding;RNA binding;structural molecule activity	Pf01201	0.531	0.792	-0.91	-0.34	9.36572e+07	4.96913e+07	1.11143e+08	8.79961e+07	5	5	5	5	9	0	16.11	7
FALSE	High	IsMasterProtein	Q9Y3Z3	Deoxynucleoside triphosphate triphosphohydrolase SAMHD1 OS=Homo sapiens GN=SAMHD1 PE=1 SV=2	FALSE	0	25.481	16.1342	7	8	7	1	626	72.2	7.14	Peak Found	High	Not Found	Not Found		25939	ENSG00000101347.8	SAMHD1	20	cell organization and biogenesis;defense response;metabolic process;regulation of biological process;response to stimulus	membrane;nucleus	catalytic activity;metal ion binding;nucleotide binding;protein binding;RNA binding	Pf00536, Pf01966, Pf07647	22.244		4.48		665674	1.48069e+07			2	5			0.567	0	7.4	7
FALSE	High	IsMasterProtein	P06733	Alpha-enolase OS=Homo sapiens GN=ENO1 PE=1 SV=2	FALSE	0	25.345	28.341	8	14	8	1	434	47.1	7.39	High	Peak Found	High	High	Dimethyl [K28; K80; K193; K221; K281; K285; K306]	2023	ENSG00000074800.13	ENO1	1	metabolic process;regulation of biological process;response to stimulus	cytoplasm;cytosol;membrane;nucleus	catalytic activity;DNA binding;metal ion binding;protein binding;RNA binding	Pf00113, Pf03952, Pf13378	0.545	0.504	-0.88	-0.99	4.25787e+07	2.31915e+07	1.76722e+07	8.9048e+06	6	5	4	3	1.043	0	8.04	8
FALSE	High	IsMasterProtein	P62906	60S ribosomal protein L10a OS=Homo sapiens GN=RPL10A PE=1 SV=2	FALSE	0	25.278	27.1889	6	13	6	1	217	24.8	9.94	High	High	High	High	Dimethyl [K78; K91; K92; K106; K118; K130]	4736	ENSG00000198755.10	RPL10A	6	cell organization and biogenesis;metabolic process;response to stimulus;transport	cytosol;membrane;nucleus;ribosome	protein binding;RNA binding;structural molecule activity	Pf00687	0.636	1.02	-0.65	0.03	6.79008e+07	4.32153e+07	7.75737e+07	7.91557e+07	5	5	5	5	2.981	0	8.01	6
FALSE	High	IsMasterProtein	Q02809-2	Isoform 2 of Procollagen-lysine,2-oxoglutarate 5-dioxygenase 1 OS=Homo sapiens GN=PLOD1	FALSE	0	25.269	17.1835	9	12	9	1	774	88.2	7.11	High	Not Found	High	Not Found	Dimethyl [K101; K232; K267; K294; K395; K673]	5351		PLOD1	1	metabolic process;response to stimulus	membrane	catalytic activity;metal ion binding;protein binding	Pf03171	0.01	0.01	-6.64	-6.64	1.72042e+07		8.21301e+06		6		3		0.49	0	1.7	9
FALSE	High	IsMasterProtein	Q9NYF8	Bcl-2-associated transcription factor 1 OS=Homo sapiens GN=BCLAF1 PE=1 SV=2	FALSE	0	25.061	13.1522	8	13	8	1	920	106.1	9.98	High	High	Peak Found	High	Dimethyl [K462; K475; K580]	9774	ENSG00000029363.16	BCLAF1	6	cell death;metabolic process;regulation of biological process;response to stimulus	cytoplasm;nucleus	DNA binding;protein binding;RNA binding	Pf15440	2.832	1.663	1.5	0.73	1.41138e+07	3.99671e+07	5.13444e+07	8.5388e+07	5	5	6	6	0.557	0	7.27	8
FALSE	High	IsMasterProtein	P62280	40S ribosomal protein S11 OS=Homo sapiens GN=RPS11 PE=1 SV=3	FALSE	0	24.379	46.8354	7	13	7	1	158	18.4	10.3	High	High	High	High	Dimethyl [K20; K30; K58; K59; K79; K136]	6205	ENSG00000142534.6	RPS11	19	cell differentiation;cell organization and biogenesis;metabolic process;transport	cytoplasm;cytosol;membrane;ribosome	protein binding;RNA binding;structural molecule activity	Pf00366	0.43	0.843	-1.22	-0.25	1.25744e+08	5.40633e+07	3.62957e+07	3.06104e+07	6	6	2	3	6.943	0	3.33	7
FALSE	High	IsMasterProtein	Q9UN86	Ras GTPase-activating protein-binding protein 2 OS=Homo sapiens GN=G3BP2 PE=1 SV=2	FALSE	0	24.197	21.7842	8	12	8	1	482	54.1	5.55	High	High	Not Found	Not Found	Dimethyl [K25; K50; K64; K224; K281]	9908	ENSG00000138757.14	G3BP2	4	regulation of biological process;response to stimulus;transport	cytoplasm;cytosol	nucleotide binding;protein binding;RNA binding;structural molecule activity	Pf00076, Pf02136, Pf14259	0.209		-2.26		1.53953e+08	3.21387e+07			7	7			1.326	0	7.22	8
FALSE	High	IsMasterProtein	P13639	Elongation factor 2 OS=Homo sapiens GN=EEF2 PE=1 SV=4	FALSE	0	24.12	13.7529	7	9	7	1	858	95.3	6.83	High	High	High	Peak Found	Dimethyl [K42; K90; K386; K594; K785; K857]	1938	ENSG00000167658.15	EEF2	19	cell differentiation;cell proliferation;metabolic process;regulation of biological process;response to stimulus;transport	cytoplasm;cytosol;extracellular;membrane;nucleus;organelle lumen;ribosome	catalytic activity;nucleotide binding;protein binding;RNA binding	Pf00009, Pf00679, Pf03144, Pf03764, Pf14492	0.301	0.15	-1.73	-2.74	1.76083e+07	5.29517e+06	4.62112e+06	693673	5	3	3	1	0.407	0	5.33	7
FALSE	High	IsMasterProtein	P50454	Serpin H1 OS=Homo sapiens GN=SERPINH1 PE=1 SV=2	FALSE	0	24.095	24.8804	6	8	6	1	418	46.4	8.69	High	Peak Found	High	Peak Found	Dimethyl [K86; K319]	871	ENSG00000149257.13	SERPINH1	11	cell organization and biogenesis;metabolic process;regulation of biological process;response to stimulus	cytoplasm;endoplasmic reticulum;membrane;organelle lumen	enzyme regulator activity;protein binding;RNA binding	Pf00079	0.291	0.192	-1.78	-2.38	5.50379e+07	1.60154e+07	32118478	6.15354e+06	4	4	4	3	0.738	0	9.46	6
FALSE	High	IsMasterProtein	P01023	Alpha-2-macroglobulin OS=Homo sapiens GN=A2M PE=1 SV=3	FALSE	0	23.686	5.83446	6	11	4	1	1474	163.2	6.46	Not Found	High	High	High	Dimethyl [K820; K1162]	2	ENSG00000175899.14	A2M	12	cell differentiation;cell organization and biogenesis;metabolic process;regulation of biological process;response to stimulus;transport	cytosol;extracellular;organelle lumen	enzyme regulator activity;protein binding	Pf00207, Pf01835, Pf07677, Pf07678, Pf07703, Pf10569, Pf11974, Pf13249	3.195	3.626	1.68	1.86	1.72215e+07	5.50215e+07	2.17097e+07	7.87287e+07	1	3	3	5	0.288	2	15.41	6
FALSE	High	IsMasterProtein	Q9Y3I0	tRNA-splicing ligase RtcB homolog OS=Homo sapiens GN=RTCB PE=1 SV=1	FALSE	0	23.629	19.0099	8	12	8	1	505	55.2	7.23	High	High	High	Peak Found	Dimethyl [K67; K279; K308; K451; K476]	51493	ENSG00000100220.11	C22orf28; RTCB	22	metabolic process	cytoplasm;cytosol;membrane;nucleus	catalytic activity;metal ion binding;nucleotide binding;protein binding;RNA binding	Pf01139	0.262	0.411	-1.93	-1.28	6.94287e+07	1.81882e+07	1.09183e+07	4.48412e+06	8	8	3	3	0.995	0	4.21	8
FALSE	High	IsMasterProtein	P11498	Pyruvate carboxylase, mitochondrial OS=Homo sapiens GN=PC PE=1 SV=2	FALSE	0	23.509	12.9032	9	10	9	1	1178	129.6	6.84	High	Not Found	High	Not Found	Dimethyl [K104; K992; K1021]	5091	ENSG00000173599.13	PC	11	metabolic process;regulation of biological process	cytoplasm;cytosol;mitochondrion;organelle lumen	catalytic activity;DNA binding;metal ion binding;nucleotide binding;protein binding	Pf00289, Pf00364, Pf00682, Pf02222, Pf02436, Pf02785, Pf02786, Pf07478, Pf08443, Pf13533, Pf13535, Pf15632	0.01	0.01	-6.64	-6.64	7.38312e+06		2.1578e+06		6		2		0.287	0	2.95	9
FALSE	High	IsMasterProtein	P16401	Histone H1.5 OS=Homo sapiens GN=HIST1H1B PE=1 SV=3	FALSE	0	23.508	21.6814	6	16	4	1	226	22.6	10.92	High	High	High	High	Dimethyl [K37; K49; K66; K78; K109]	3009	ENSG00000184357.4	HIST1H1B	6	cell organization and biogenesis;regulation of biological process	chromosome;nucleus	DNA binding;protein binding;RNA binding	Pf00538	0.323	1.152	-1.63	0.2	8.50115e+07	2.74232e+07	1.99304e+07	2.29498e+07	3	3	4	4	3.125	0	8.3	6
FALSE	High	IsMasterProtein	P09496-2	Isoform Non-brain of Clathrin light chain A OS=Homo sapiens GN=CLTA	FALSE	0	23.225	25.6881	6	9	6	1	218	23.6	4.53	High	High	Peak Found	High	Dimethyl [K212]	1211	ENSG00000122705.16	CLTA	9	cell division;cell organization and biogenesis;cellular component movement;transport	cytosol;membrane	protein binding;structural molecule activity	Pf01086	2.882	1.112	1.53	0.15	6.18941e+07	1.78398e+08	2.327e+06	2.58789e+06	5	6	1	1	5.31	0	8.51	6
FALSE	High	IsMasterProtein	Q9Y608	Leucine-rich repeat flightless-interacting protein 2 OS=Homo sapiens GN=LRRFIP2 PE=1 SV=1	FALSE	0	23.143	13.7309	6	10	6	1	721	82.1	6.95	High	High	Peak Found	High	Dimethyl [K692; K705]	9209	ENSG00000093167.17	LRRFIP2	3	metabolic process;regulation of biological process;response to stimulus		catalytic activity;motor activity;protein binding	Pf01576, Pf02463, Pf04111, Pf05557, Pf09738, Pf13514, Pf13870	9.745	3.984	3.28	1.99	1.34627e+07	131200625	7.92206e+06	3.15652e+07	3	5	2	2	0.48	0	14.48	6
FALSE	High	IsMasterProtein	P12532-2	Isoform 2 of Creatine kinase U-type, mitochondrial OS=Homo sapiens GN=CKMT1A	FALSE	0	22.773	29.0179	8	10	8	1	448	50.4	8.62	Not Found	High	Not Found	High		548596; 1159		CKMT1A; CKMT1B	15	metabolic process	membrane;mitochondrion	catalytic activity;nucleotide binding	Pf00217, Pf02807	100	100	6.64	6.64		1.45193e+07		16656628		4		4	0.778	0	11.3	8
FALSE	High	IsMasterProtein	P07355-2	Isoform 2 of Annexin A2 OS=Homo sapiens GN=ANXA2	FALSE	0	22.765	21.2885	6	11	6	1	357	40.4	8.37	High	High	High	High	Dimethyl [K65]	302	ENSG00000182718.16	ANXA2	15	cell organization and biogenesis;regulation of biological process;response to stimulus;transport	cell surface;cytosol;endosome;extracellular;membrane;nucleus;organelle lumen	enzyme regulator activity;metal ion binding;protein binding;RNA binding	Pf00191	2.104	0.869	1.07	-0.2	7.67886e+06	1.61528e+07	1.45899e+07	1.26774e+07	3	3	5	5	1.089	0	9.94	6
FALSE	High	IsMasterProtein	P62805	Histone H4 OS=Homo sapiens GN=HIST1H4A PE=1 SV=2	FALSE	0	22.743	34.9515	5	12	5	1	103	11.4	11.36	High	High	High	High	Dimethyl [K32; K92]	8359; 8361; 8360; 8363; 8370; 554313; 8365; 8364; 121504; 8367; 8294; 8366; 8362; 8368	ENSG00000197061.4; ENSG00000275126.1; ENSG00000273542.1; ENSG00000197238.4; ENSG00000197837.3; ENSG00000276966.2; ENSG00000158406.4; ENSG00000270882.2; ENSG00000274618.1; ENSG00000278637.1; ENSG00000277157.1; ENSG00000278705.1; ENSG00000270276.2; ENSG00000276180.1	HIST1H4A; HIST1H4F; HIST1H4D; HIST1H4J; HIST2H4A; HIST2H4B; HIST1H4H; HIST1H4C; HIST4H4; HIST1H4E; HIST1H4I; HIST1H4B; HIST1H4K; HIST1H4L	6; 1; 12	cell organization and biogenesis;metabolic process;regulation of biological process;response to stimulus	chromosome;extracellular;membrane;nucleus	DNA binding;protein binding;RNA binding	Pf00125, Pf02969, Pf15630	3.679	3.77	1.88	1.91	3.88868e+07	1.43052e+08	5.51667e+07	2.07995e+08	3	4	5	5	20.544	0	12.89	5
FALSE	High	IsMasterProtein	P52272	Heterogeneous nuclear ribonucleoprotein M OS=Homo sapiens GN=HNRNPM PE=1 SV=3	FALSE	0	22.653	15.3425	7	14	7	1	730	77.5	8.7	High	High	High	High	Dimethyl [K83; K110; K667]	4670	ENSG00000099783.11	HNRNPM	19	metabolic process;regulation of biological process;response to stimulus	membrane;nucleus;spliceosomal complex	nucleotide binding;protein binding;RNA binding	Pf00076, Pf11532, Pf11608, Pf13893, Pf14259	0.261	0.298	-1.94	-1.75	3.72789e+07	9.7413e+06	8.09384e+07	2.40803e+07	5	4	6	5	0.458	0	5.88	7
FALSE	High	IsMasterProtein	Q14103	Heterogeneous nuclear ribonucleoprotein D0 OS=Homo sapiens GN=HNRNPD PE=1 SV=1	FALSE	0	22.568	22.2535	7	12	5	1	355	38.4	7.81	High	High	Not Found	Not Found	Dimethyl [K110; K111; K146; K197; K231]	3184	ENSG00000138668.18	HNRNPD	4	cell organization and biogenesis;metabolic process;regulation of biological process;response to stimulus	cytoplasm;cytosol;nucleus	DNA binding;nucleotide binding;protein binding;RNA binding	Pf00076, Pf13893, Pf14259	0.355		-1.49		1.52819e+07	5.42899e+06			4	3			2.981	0	10.49	7
FALSE	High	IsMasterProtein	Q8TCU4	Alstrom syndrome protein 1 OS=Homo sapiens GN=ALMS1 PE=1 SV=3	FALSE	0	22.215	4.07967	9	12	9	1	4167	460.7	6.28	High	Not Found	High	High	Dimethyl [K579; K599; K835; K912; K932; K1291; K1310; K1716; K1736; K2086; K2297; K2891]	7840		ALMS1	2	regulation of biological process;transport	cytoplasm;cytoskeleton;cytosol	protein binding	Pf15309	0.01	0.706	-6.64	-0.5	3.86963e+06		1.62018e+07	11431189	4		6	1	0.102	0	2.78	9
FALSE	High	IsMasterProtein	P27708	CAD protein OS=Homo sapiens GN=CAD PE=1 SV=3	FALSE	0	22.14	7.10112	11	14	10	1	2225	242.8	6.46	High	Peak Found	High	Peak Found	Dimethyl [K186; K708; K739; K1228]	790	ENSG00000084774.13	CAD	2	metabolic process;response to stimulus;transport	cytoplasm;cytosol;membrane;nucleus	catalytic activity;metal ion binding;nucleotide binding;protein binding	Pf00117, Pf00185, Pf00289, Pf00988, Pf01979, Pf02142, Pf02222, Pf02729, Pf02786, Pf02787, Pf07478, Pf07722, Pf13147, Pf13535, Pf13594, Pf15632	0.129	0.092	-2.95	-3.44	2.82782e+07	3.65189e+06	2.29278e+07	2.11219e+06	6	4	4	3	0.239	0	1.85	11
FALSE	High	IsMasterProtein	Q9P209	Centrosomal protein of 72 kDa OS=Homo sapiens GN=CEP72 PE=1 SV=2	FALSE	0	21.667	16.3833	8	14	8	1	647	71.7	6.52	High	Not Found	High	Not Found	Dimethyl [K42; K250; K538; K572]	55722	ENSG00000112877.7	CEP72	5	cell organization and biogenesis	cytoplasm;cytoskeleton;cytosol	protein binding	Pf12799, Pf13855, Pf14580	0.01	0.01	-6.64	-6.64	1.25483e+07		2.16501e+07		4		6		0.535	0	11.79	8
FALSE	High	IsMasterProtein	P61353	60S ribosomal protein L27 OS=Homo sapiens GN=RPL27 PE=1 SV=2	FALSE	0	21.593	38.2353	5	15	5	1	136	15.8	10.56	High	High	High	High	Dimethyl [K93]	6155	ENSG00000131469.12	RPL27	17	cell organization and biogenesis;metabolic process;transport	cytosol;membrane;nucleus;ribosome	RNA binding;structural molecule activity	Pf00467, Pf01777	0.64	1.108	-0.64	0.15	1.96873e+08	1.26047e+08	1.86078e+08	2.06153e+08	4	4	4	4	20.544	0	18.75	5
FALSE	High	IsMasterProtein	Q96R06	Sperm-associated antigen 5 OS=Homo sapiens GN=SPAG5 PE=1 SV=2	FALSE	0	21.529	9.30427	7	7	7	1	1193	134.3	5	High	Not Found	High	Not Found	Dimethyl [K348; K891; K946; K1121]	10615	ENSG00000076382.16	SPAG5	17	cell division;cell organization and biogenesis;regulation of biological process	chromosome;cytoplasm;cytoskeleton	protein binding		0.01	0.01	-6.64	-6.64	4.23085e+06		2.19454e+06		4		2		0.255	0	4.82	7
FALSE	High	IsMasterProtein	O95359-3	Isoform 3 of Transforming acidic coiled-coil-containing protein 2 OS=Homo sapiens GN=TACC2	FALSE	0	20.883	5.36398	9	10	9	1	2871	300.9	4.78	Not Found	High	Not Found	High						cell organization and biogenesis;cellular component movement;metabolic process;regulation of biological process;response to stimulus;transport	cytoskeleton	catalytic activity;motor activity;protein binding;transporter activity	Pf00430, Pf01576, Pf02463, Pf04156, Pf05010, Pf05384, Pf05557, Pf05816, Pf06160, Pf07926, Pf08317, Pf09728, Pf09731, Pf10174, Pf12037, Pf12072, Pf12128, Pf13851, Pf13863, Pf13868, Pf14643, Pf14988, Pf15272, Pf15619	100	100	6.64	6.64		3.77218e+06		1.10782e+07		1		6	0.147	0	1.8	9
FALSE	High	IsMasterProtein	P46776	60S ribosomal protein L27a OS=Homo sapiens GN=RPL27A PE=1 SV=2	FALSE	0	20.846	32.4324	6	9	6	1	148	16.6	11	High	High	High	High	Dimethyl [K77]	6157	ENSG00000166441.12	RPL27A	11	cell organization and biogenesis;metabolic process;transport	cytosol;endoplasmic reticulum;membrane;ribosome	protein binding;RNA binding;structural molecule activity	Pf00828	0.54	0.882	-0.89	-0.18	7.1512e+07	3.86189e+07	4.83468e+07	4.2637e+07	2	2	3	5	9	0	12.96	6
FALSE	High	IsMasterProtein	P46778	60S ribosomal protein L21 OS=Homo sapiens GN=RPL21 PE=1 SV=2	FALSE	0	20.739	27.5	3	11	3	1	160	18.6	10.49	High	High	High	High	Dimethyl [K78; K146]	6144	ENSG00000122026.10	RPL21	13	cell organization and biogenesis;metabolic process;transport	cytosol;membrane;ribosome	protein binding;RNA binding;structural molecule activity	Pf01157	0.735	1.265	-0.44	0.34	34458289	2.53217e+07	8.11715e+06	1.02648e+07	3	3	2	2	4.995	0	15.4	3
FALSE	High	IsMasterProtein	O43390-2	Isoform 2 of Heterogeneous nuclear ribonucleoprotein R OS=Homo sapiens GN=HNRNPR	FALSE	0	20.571	10.2201	6	9	1	1	636	71.2	8.13	High	High	Peak Found	High	Dimethyl [K103; K187; K303]	10236	ENSG00000282958.1; ENSG00000125944.18	HNRNPR	1; CHR_HSCHR1_4_CTG3	metabolic process;regulation of biological process	endoplasmic reticulum;spliceosomal complex	nucleotide binding;protein binding;RNA binding	Pf00076, Pf13893, Pf14259	1.152	0.925	0.2	-0.11	2.92338e+06	3.36832e+06	2.47674e+06	2.29083e+06	1	1	1	1	0.567	0	7.24	6
FALSE	High	IsMasterProtein	CON_ENSEMBL	ENSBTAP00000024146 (Bos taurus) similar to alpha-2-macroglobulin isoform 1	TRUE	0	20.512	2.97901	4	8	2	1	1477	164.2	6.02	High	High	High	High	Dimethyl [K678; K825]									11.86	10.617	3.57	3.41	3.5534e+06	4.21416e+07	1.67448e+06	1.77772e+07	2	2	1	1	0.168	0	11.12	4
FALSE	High	IsMasterProtein	P62263	40S ribosomal protein S14 OS=Homo sapiens GN=RPS14 PE=1 SV=3	FALSE	0	20.511	24.5033	3	10	3	1	151	16.3	10.05	High	High	High	High	Dimethyl [K63]	6208	ENSG00000164587.11	RPS14	5	cell differentiation;cell organization and biogenesis;metabolic process;regulation of biological process;transport	cytosol;membrane;mitochondrion;ribosome	protein binding;RNA binding;structural molecule activity;translation regulator activity	Pf00411	0.333	0.556	-1.59	-0.85	6.02349e+07	2.00594e+07	3.94011e+07	2.19108e+07	3	3	3	3	4.179	0	8.6	3
FALSE	High	IsMasterProtein	P62899-2	Isoform 2 of 60S ribosomal protein L31 OS=Homo sapiens GN=RPL31	FALSE	0	20.425	17.9688	2	10	2	1	128	14.6	10.8	High	High	High	High	Dimethyl [K115]	6160	ENSG00000071082.10	RPL31	2	cell organization and biogenesis;metabolic process;transport	cytosol;membrane;ribosome	protein binding;RNA binding;structural molecule activity	Pf01198	0.316	0.519	-1.66	-0.95	161014661	5.08245e+07	2.28433e+07	1.18611e+07	2	2	1	1	4.179	0	19.34	2
FALSE	High	IsMasterProtein	Q96N67	Dedicator of cytokinesis protein 7 OS=Homo sapiens GN=DOCK7 PE=1 SV=4	FALSE	0	20.125	6.16822	9	10	9	1	2140	242.4	6.8	High	Peak Found	High	Peak Found	Dimethyl [K233; K258; K366; K771; K1863; K1869]	85440	ENSG00000116641.17	DOCK7	1	cell differentiation;cell organization and biogenesis;development;regulation of biological process;response to stimulus		protein binding	Pf06920, Pf11878, Pf14429	0.463	0.098	-1.11	-3.35	9.02136e+06	4.17991e+06	1.52171e+07	1.49029e+06	4	3	4	4	0.179	0	3.98	9
FALSE	High	IsMasterProtein	P13010	X-ray repair cross-complementing protein 5 OS=Homo sapiens GN=XRCC5 PE=1 SV=3	FALSE	0	20.007	6.55738	4	6	4	1	732	82.7	5.81	High	High	Peak Found	High	Dimethyl [K465]	7520	ENSG00000079246.15	XRCC5	2	cell differentiation;cell organization and biogenesis;cell proliferation;metabolic process;regulation of biological process;response to stimulus;transport	chromosome;cytoplasm;cytosol;extracellular;membrane;nucleus;organelle lumen	catalytic activity;DNA binding;nucleotide binding;protein binding;RNA binding	Pf02735, Pf03730, Pf03731, Pf08785	3.195	1.042	1.68	0.06	5.3534e+06	1.71036e+07	662549	690588	2	3	1	1	0.292	0	5.68	4
FALSE	High	IsMasterProtein	P26373	60S ribosomal protein L13 OS=Homo sapiens GN=RPL13 PE=1 SV=4	FALSE	0	20.003	29.3839	6	14	6	1	211	24.2	11.65	High	High	High	High		6137	ENSG00000167526.13	RPL13	16	cell organization and biogenesis;metabolic process;transport	cytosol;membrane;nucleus;ribosome	protein binding;RNA binding;structural molecule activity	Pf01294	0.596	1.023	-0.75	0.03	1.44836e+08	8.63033e+07	8.59313e+07	8.78728e+07	4	4	4	4	3.394	0	14.56	6
FALSE	High	IsMasterProtein	Q15366-2	Isoform 2 of Poly(rC)-binding protein 2 OS=Homo sapiens GN=PCBP2	FALSE	0	19.881	23.4973	5	10	3	1	366	38.6	6.79	High	Peak Found	High	High	Dimethyl [K31; K70; K115; K276]	5094	ENSG00000197111.15	PCBP2	12	defense response;metabolic process;regulation of biological process;response to stimulus	cytoplasm;cytosol;membrane;nucleus	protein binding;RNA binding	Pf00013, Pf13014	0.177	0.193	-2.5	-2.37	4.908e+07	8.70326e+06	1.65798e+07	3.20448e+06	3	2	1	1	1.512	0	5.5	5
FALSE	High	IsMasterProtein	CON_ENSEMBL	ENSBTAP00000011227 (Bos taurus) 15 kDa protein	TRUE	0	19.803	15.3285	1	5	1	1	137	14.6	9.44	High	High	High	High	Dimethyl [K94]									0.68	0.733	-0.56	-0.45	3.05098e+07	2.07573e+07	2.37897e+07	1.74465e+07	2	2	1	1	2.162	0	19.09	1
FALSE	High	IsMasterProtein	Q9Y3U8	60S ribosomal protein L36 OS=Homo sapiens GN=RPL36 PE=1 SV=3	FALSE	0	19.738	21.9048	4	10	4	1	105	12.2	11.59	High	High	High	High	Dimethyl [K86]	25873	ENSG00000130255.12	RPL36	19	cell organization and biogenesis;metabolic process;transport	cytoplasm;cytosol;membrane;ribosome	RNA binding;structural molecule activity	Pf01158	0.587	1.145	-0.77	0.2	6.38834e+07	3.7512e+07	61832563	7.08284e+07	3	3	4	4	13.678	0	15.98	4
FALSE	High	IsMasterProtein	P12004	Proliferating cell nuclear antigen OS=Homo sapiens GN=PCNA PE=1 SV=1	FALSE	0	19.487	32.9502	6	10	6	1	261	28.8	4.69	High	Peak Found	High	Peak Found	Dimethyl [K77; K110; K138; K164; K217]	5111	ENSG00000132646.10	PCNA	20	cell differentiation;cell organization and biogenesis;cell proliferation;cellular homeostasis;metabolic process;regulation of biological process;response to stimulus	nucleus	catalytic activity;DNA binding;enzyme regulator activity;protein binding	Pf00705, Pf02747	0.057	0.058	-4.12	-4.11	42363006	2.42982e+06	3.01398e+07	1.74432e+06	4	2	3	3	1.069	0	10.77	6
FALSE	High	IsMasterProtein	P63167	Dynein light chain 1, cytoplasmic OS=Homo sapiens GN=DYNLL1 PE=1 SV=1	FALSE	0	19.394	50.5618	4	9	4	1	89	10.4	7.4	High	High	High	High	Dimethyl [K31]	8655	ENSG00000088986.10	DYNLL1	12	cell communication;cell death;cell organization and biogenesis;cellular component movement;metabolic process;regulation of biological process;response to stimulus;transport	chromosome;cytoplasm;cytoskeleton;cytosol;membrane;mitochondrion;nucleus	catalytic activity;motor activity;protein binding	Pf01221	2.4	3.232	1.26	1.69	1.64631e+07	3.95167e+07	3.40004e+07	1.09873e+08	2	2	2	3	14.849	0	6.64	4
FALSE	High	IsMasterProtein	P42766	60S ribosomal protein L35 OS=Homo sapiens GN=RPL35 PE=1 SV=2	FALSE	0	19.388	29.2683	4	8	4	1	123	14.5	11.05	High	High	Peak Found	High	Dimethyl [K25; K66; K79; K86]	11224	ENSG00000136942.14	RPL35	9	cell organization and biogenesis;metabolic process;transport	cytosol;membrane;ribosome	RNA binding;structural molecule activity	Pf00831	0.506	1.291	-0.98	0.37	1.75922e+08	8.90554e+07	5.27249e+06	6.8086e+06	4	4	1	1	13.678	0	9.47	4
FALSE	High	IsMasterProtein	P62917	60S ribosomal protein L8 OS=Homo sapiens GN=RPL8 PE=1 SV=2	FALSE	0	19.301	30.3502	5	9	5	1	257	28	11.03	High	High	High	High	Dimethyl [K92; K119; K144]	6132	ENSG00000161016.17	RPL8	8	cell organization and biogenesis;metabolic process;response to stimulus;transport	cytoplasm;cytosol;membrane;ribosome	RNA binding;structural molecule activity	Pf00181, Pf03947	0.66	1.048	-0.6	0.07	3.07603e+07	2.02991e+07	3.84578e+07	4.03082e+07	3	2	3	3	2.162	0	5.8	5
FALSE	High	IsMasterProtein	P26599-3	Isoform 3 of Polypyrimidine tract-binding protein 1 OS=Homo sapiens GN=PTBP1	FALSE	0	19.108	9.33573	3	7	3	1	557	59.6	9.16	High	High	High	High		5725	ENSG00000011304.19	PTBP1	19	metabolic process;regulation of biological process;response to stimulus	membrane;nucleus	nucleotide binding;protein binding;RNA binding	Pf00076, Pf13893, Pf14259	0.412	0.534	-1.28	-0.9	8.82795e+06	3.63435e+06	1.14608e+07	6.12289e+06	2	2	3	3	0.445	0	12.22	3
FALSE	High	IsMasterProtein	Q9UHI6	Probable ATP-dependent RNA helicase DDX20 OS=Homo sapiens GN=DDX20 PE=1 SV=2	FALSE	0	19.019	8.98058	5	10	5	1	824	92.2	6.95	High	High	High	High	Dimethyl [K107; K332; K582]	11218	ENSG00000064703.11	DDX20	1	cell organization and biogenesis;metabolic process;regulation of biological process;transport	cytoplasm;cytoskeleton;cytosol;membrane;nucleus	catalytic activity;DNA binding;nucleotide binding;protein binding	Pf00270, Pf00271	0.869	1.582	-0.2	0.66	2.66743e+06	2.31833e+06	9.80994e+06	1.55201e+07	2	2	4	4	0.435	0	4.86	5
FALSE	High	IsMasterProtein	P60866-2	Isoform 2 of 40S ribosomal protein S20 OS=Homo sapiens GN=RPS20	FALSE	0	18.832	19.0141	3	7	3	1	142	16	9.32	High	High	High	High	Dimethyl [K8; K99]	6224	ENSG00000008988.9	RPS20	8	cell organization and biogenesis;metabolic process;transport	cytosol;membrane	protein binding;RNA binding;structural molecule activity	Pf00338	0.364	1.207	-1.46	0.27	6.71971e+07	2.4458e+07	1.55644e+07	1.87838e+07	1	1	1	2	4.179	0	13.14	3
FALSE	High	IsMasterProtein	P0C0L4	Complement C4-A OS=Homo sapiens GN=C4A PE=1 SV=2	FALSE	0	18.576	2.80963	3	8	3	1	1744	192.7	7.08	High	High	High	High	Dimethyl [K1084; K1204]	720	ENSG00000244731.7	C4A	6	defense response;metabolic process;regulation of biological process;response to stimulus	extracellular;membrane	catalytic activity;enzyme regulator activity;protein binding	Pf00207, Pf01759, Pf01821, Pf01835, Pf07677, Pf07678, Pf07703, Pf10569, Pf11974, Pf13249	1.762	1.012	0.82	0.02	4.2951e+06	7.56766e+06	1.03045e+07	1.04294e+07	1	2	2	2	0.155	0	7.15	3
FALSE	High	IsMasterProtein	Q02241	Kinesin-like protein KIF23 OS=Homo sapiens GN=KIF23 PE=1 SV=3	FALSE	0	18.57	9.58333	6	7	6	1	960	110	8.51	Not Found	High	Peak Found	High		9493	ENSG00000137807.13	KIF23	15	cell division;cell organization and biogenesis;cellular component movement;regulation of biological process;transport	cytoplasm;cytoskeleton;cytosol;nucleus	catalytic activity;motor activity;nucleotide binding;protein binding	Pf00225, Pf02463, Pf03938, Pf05852, Pf11559, Pf12329, Pf15294	100	26.411	6.64	4.72		1.06805e+06	703754	1.8587e+07		1	2	6	0.269	0	10.22	6
FALSE	High	IsMasterProtein	P35268	60S ribosomal protein L22 OS=Homo sapiens GN=RPL22 PE=1 SV=2	FALSE	0	18.567	39.8438	4	7	4	1	128	14.8	9.19	High	High	High	High	Dimethyl [K80]	6146	ENSG00000116251.9	RPL22	1	cell differentiation;cell organization and biogenesis;metabolic process;transport	cytoplasm;cytosol;nucleus;ribosome	protein binding;RNA binding;structural molecule activity	Pf01776	0.481	1.141	-1.06	0.19	9.35174e+07	4.49994e+07	1.04215e+07	1.18901e+07	3	3	1	1	5.813	0	11.05	4
FALSE	High	IsMasterProtein	P62913	60S ribosomal protein L11 OS=Homo sapiens GN=RPL11 PE=1 SV=2	FALSE	0	18.451	20.7865	3	8	3	1	178	20.2	9.6	High	Peak Found	High	High	Dimethyl [K19; K52; K178]	6135	ENSG00000142676.12	RPL11	1	cell organization and biogenesis;metabolic process;transport	cytoplasm;cytosol;membrane;nucleus;ribosome	protein binding;RNA binding;structural molecule activity	Pf00281, Pf00673	0.695	0.801	-0.52	-0.32	8.37533e+07	5.82203e+07	6.29176e+07	5.04056e+07	2	2	3	3	3.642	0	8.25	3
FALSE	High	IsMasterProtein	Q01082	Spectrin beta chain, non-erythrocytic 1 OS=Homo sapiens GN=SPTBN1 PE=1 SV=2	FALSE	0	18.448	2.70728	4	8	4	1	2364	274.4	5.57	Peak Found	High	High	High	Dimethyl [K462; K1011; K1344; K1352]	6711	ENSG00000115306.15	SPTBN1	2	cell organization and biogenesis;cellular component movement;metabolic process;regulation of biological process;response to stimulus;transport	cytoplasm;cytoskeleton;cytosol;membrane;nucleus	protein binding;RNA binding;structural molecule activity	Pf00169, Pf00307, Pf00435, Pf11971, Pf12128, Pf15410	5.924	0.797	2.57	-0.33	214055	1.26816e+06	9.18104e+06	7.31467e+06	1	1	4	4	0.105	0	6.2	4
FALSE	High	IsMasterProtein	P26196	Probable ATP-dependent RNA helicase DDX6 OS=Homo sapiens GN=DDX6 PE=1 SV=2	FALSE	0	18.268	17.3913	6	10	6	1	483	54.4	8.66	High	High	High	Peak Found	Dimethyl [K286; K458; K466; K482]	1656	ENSG00000110367.11	DDX6	11	cell organization and biogenesis;metabolic process;regulation of biological process	cytoplasm;cytosol;membrane;mitochondrion;nucleus	catalytic activity;nucleotide binding;protein binding;RNA binding	Pf00270, Pf00271, Pf14617	0.09	0.073	-3.48	-3.78	2.50366e+07	2.24978e+06	8.21061e+06	597378	3	2	3	2	0.743	0	2.29	6
FALSE	High	IsMasterProtein	Q7Z417	Nuclear fragile X mental retardation-interacting protein 2 OS=Homo sapiens GN=NUFIP2 PE=1 SV=1	FALSE	0	18.132	10.0719	5	5	5	1	695	76.1	8.7	High	Peak Found	Not Found	Not Found	Dimethyl [K407; K581; K603; K617]	57532	ENSG00000108256.8	NUFIP2	17		cytoplasm;cytosol;membrane;nucleus;ribosome	protein binding;RNA binding	Pf15293	0.195		-2.36		4.91593e+07	9.58048e+06			5	5			0.433	0	8.89	5
FALSE	High	IsMasterProtein	P22087	rRNA 2'-O-methyltransferase fibrillarin OS=Homo sapiens GN=FBL PE=1 SV=2	FALSE	0	18.042	28.972	8	8	8	1	321	33.8	10.18	Not Found	Not Found	Peak Found	High		2091	ENSG00000280548.3; ENSG00000105202.8	FBL	19; CHR_HG2021_PATCH	cell differentiation;cell organization and biogenesis;metabolic process	chromosome;membrane;nucleus	catalytic activity;protein binding;RNA binding	Pf01135, Pf01269, Pf13847		5.875		2.55			7.69186e+06	4.5192e+07			3	7	1.228	0	1.86	8
FALSE	High	IsMasterProtein	CON_ENSEMBL	ENSBTAP00000033053 (Bos taurus) 15 kDa protein	TRUE	0	18.039	34.5324	2	7	2	1	139	14.8	9.45	High	High	High	High	Dimethyl [K45; K64; K96]									0.538	0.751	-0.89	-0.41	5.8868e+07	3.16825e+07	6.02922e+07	4.53058e+07	2	2	3	3	2.162	0	13.88	2
FALSE	High	IsMasterProtein	P17812	CTP synthase 1 OS=Homo sapiens GN=CTPS1 PE=1 SV=2	FALSE	0	18.008	10.4907	4	7	4	1	591	66.6	6.46	High	Peak Found	High	Peak Found		1503	ENSG00000171793.13	CTPS1	1	cell proliferation;metabolic process;response to stimulus	cytosol;membrane	catalytic activity;nucleotide binding;protein binding	Pf00117, Pf06418, Pf07722	0.132	0.108	-2.92	-3.21	5.17366e+06	682530	2.7583e+06	299032	2	2	1	1	0.301	0	11.85	4
FALSE	High	IsMasterProtein	P18621-3	Isoform 3 of 60S ribosomal protein L17 OS=Homo sapiens GN=RPL17	FALSE	0	17.928	26.3158	6	11	6	1	228	26.4	10.1	High	High	High	High	Dimethyl [K153; K159; K167]	100526842	ENSG00000215472.10	RPL17-C18ORF32	18	metabolic process	ribosome	structural molecule activity	Pf00237	0.618	2.153	-0.69	1.11	6.25522e+07	3.8668e+07	1.16989e+07	2.51852e+07	3	5	1	4	1.929	0	2.56	6
FALSE	High	IsMasterProtein	P43490	Nicotinamide phosphoribosyltransferase OS=Homo sapiens GN=NAMPT PE=1 SV=1	FALSE	0	17.753	16.9043	6	6	6	1	491	55.5	7.15	High	Peak Found	High	Not Found	Dimethyl [K107; K117; K189; K323; K369; K478]	10135	ENSG00000105835.11	NAMPT	7	cell communication;metabolic process;regulation of biological process;response to stimulus	cytoplasm;cytosol;extracellular;nucleus	catalytic activity;protein binding	Pf04095	0.113		-3.14		1.04291e+07	1.182e+06			4	2			0.585	0	4.89	6
FALSE	High	IsMasterProtein	Q9NVI7-2	Isoform 2 of ATPase family AAA domain-containing protein 3A OS=Homo sapiens GN=ATAD3A	FALSE	0	17.669	11.4334	4	5	4	1	586	66.2	9.25	High	Peak Found	High	Peak Found	Dimethyl [K92; K94; K104]	55210	ENSG00000197785.13	ATAD3A	1	cell growth;regulation of biological process	membrane;mitochondrion	catalytic activity;nucleotide binding;RNA binding	Pf00004, Pf00910, Pf01078, Pf05707, Pf06745, Pf07728, Pf12037, Pf13207, Pf13401	0.074	0.083	-3.76	-3.59	4.28265e+06	315410	1.44924e+07	1.20187e+06	1	1	3	2	0.239	0	4.95	4
FALSE	High	IsMasterProtein	Q05682-3	Isoform 3 of Caldesmon OS=Homo sapiens GN=CALD1	FALSE	0	17.288	18.8172	7	9	7	1	558	64.2	7.02	Peak Found	High	Peak Found	High		800	ENSG00000122786.19	CALD1	7	cellular component movement	cytoskeleton;cytosol;membrane	protein binding	Pf02029	4.808	1.921	2.27	0.94	9.0853e+06	4.36858e+07	4.51561e+06	8.67661e+06	4	5	1	2	0.585	0	6.05	7
FALSE	High	IsMasterProtein	O15143	Actin-related protein 2/3 complex subunit 1B OS=Homo sapiens GN=ARPC1B PE=1 SV=3	FALSE	0	17.214	26.0753	7	9	7	1	372	40.9	8.35	High	High	Peak Found	High	Dimethyl [K326]	10095	ENSG00000130429.12	ARPC1B	7	cell organization and biogenesis;cellular component movement;regulation of biological process;response to stimulus	cytoplasm;cytoskeleton;cytosol	protein binding;structural molecule activity	Pf00400	2.782	5.363	1.48	2.42	2.21027e+07	6.14893e+07	2.07175e+06	11111761	5	6	1	2	1.336	0	7.85	7
FALSE	High	IsMasterProtein	P63173	60S ribosomal protein L38 OS=Homo sapiens GN=RPL38 PE=1 SV=2	FALSE	0	16.978	48.5714	4	12	4	1	70	8.2	10.1	High	High	High	High	Dimethyl [K9; K50; K52; K67]	6169	ENSG00000172809.12	RPL38	17	cell organization and biogenesis;metabolic process;regulation of biological process;transport	cytosol;ribosome	RNA binding;structural molecule activity	Pf01781	0.252	0.52	-1.99	-0.94	8.37037e+07	2.1103e+07	3.69787e+07	1.92292e+07	4	5	3	2	214.443	0	4.12	4
FALSE	High	IsMasterProtein	P62854	40S ribosomal protein S26 OS=Homo sapiens GN=RPS26 PE=1 SV=3	FALSE	0	16.931	33.913	3	7	3	1	115	13	11	High	High	High	High	Dimethyl [K66; K113]	6231; 101929876; 728937	ENSG00000197728.9	RPS26; LOC101929876; RPS26P25	12; 20; 4	cell organization and biogenesis;metabolic process;regulation of biological process;transport	cytosol;membrane;ribosome	protein binding;RNA binding;structural molecule activity	Pf01283	0.963	0.844	-0.05	-0.24	1.44301e+07	1.38977e+07	2.07363e+07	1.75106e+07	2	3	2	2	5.813	0	8.77	3
FALSE	High	IsMasterProtein	Q8NC51	Plasminogen activator inhibitor 1 RNA-binding protein OS=Homo sapiens GN=SERBP1 PE=1 SV=2	FALSE	0	16.815	10.2941	3	6	3	1	408	44.9	8.65	High	Peak Found	High	High	Dimethyl [K32; K294]	26135	ENSG00000142864.14	SERBP1	1	regulation of biological process	cytoplasm;cytosol;membrane;nucleus	protein binding;RNA binding	Pf04774	0.908	1.148	-0.14	0.2	1.47665e+07	1.34041e+07	1.40624e+07	1.61376e+07	2	1	2	2	0.616	0	8.37	3
FALSE	High	IsMasterProtein	O15027-5	Isoform 5 of Protein transport protein Sec16A OS=Homo sapiens GN=SEC16A	FALSE	0	16.725	5.17946	6	10	6	1	2201	235.6	5.67	High	High	High	High	Dimethyl [K1687; K1871]								Pf12931, Pf12932	0.75	1.072	-0.41	0.1	1.27498e+07	9.56481e+06	5.723e+06	6.13753e+06	4	4	3	3	0.233	0	2.49	6
FALSE	High	IsMasterProtein	P62269	40S ribosomal protein S18 OS=Homo sapiens GN=RPS18 PE=1 SV=3	FALSE	0	16.718	27.6316	4	10	4	1	152	17.7	10.99	High	High	High	High	Dimethyl [K34; K106]	6222	ENSG00000223367.6; ENSG00000096150.9; ENSG00000235650.6; ENSG00000226225.6; ENSG00000231500.6	RPS18	6; CHR_HSCHR6_MHC_DBB_CTG1; CHR_HSCHR6_MHC_QBL_CTG1; CHR_HSCHR6_MHC_COX_CTG1; CHR_HSCHR6_MHC_MCF_CTG1	cell organization and biogenesis;metabolic process;transport	cytoplasm;cytosol;membrane;nucleus;ribosome	protein binding;RNA binding;structural molecule activity	Pf00416	0.499	0.579	-1	-0.79	1.15512e+08	5.75828e+07	1.4051e+08	8.13706e+07	3	4	4	4	2.831	0	8.24	4
FALSE	High	IsMasterProtein	P49368	T-complex protein 1 subunit gamma OS=Homo sapiens GN=CCT3 PE=1 SV=4	FALSE	0	16.697	16.6972	5	5	5	1	545	60.5	6.49	High	Peak Found	High	Peak Found	Dimethyl [K353; K425; K502]	7203	ENSG00000163468.14	CCT3	1	cell organization and biogenesis;metabolic process;regulation of biological process;transport	cytoplasm;cytoskeleton;cytosol;membrane	nucleotide binding;protein binding;RNA binding	Pf00118	0.072	0.087	-3.79	-3.53	2.00611e+07	1.45083e+06	4.39637e+06	380824	3	1	2	1	0.354	0	6.52	5
FALSE	High	IsMasterProtein	Q15365	Poly(rC)-binding protein 1 OS=Homo sapiens GN=PCBP1 PE=1 SV=2	FALSE	0	16.614	20.7865	5	7	3	1	356	37.5	7.09	High	Peak Found	High	Peak Found	Dimethyl [K31; K70; K160]	5093	ENSG00000169564.6	PCBP1	2	metabolic process;regulation of biological process	cytoplasm;cytosol;membrane;nucleus	DNA binding;protein binding;RNA binding	Pf00013, Pf13014	0.36	0.254	-1.47	-1.98	1.1158e+06	401814	3.65285e+07	9.26484e+06	1	1	3	3	0.931	2	3.32	5
FALSE	High	IsMasterProtein	CON_ENSEMBL	ENSBTAP00000014147 (Bos taurus) 12 kDa protein	TRUE	0	16.557	53.0973	4	9	4	1	113	11.7	6.55	High	Peak Found	High	High										0.676	0.879	-0.57	-0.19	6.50456e+07	4.39444e+07	1.18653e+08	1.04326e+08	2	2	5	5	9	0	9.2	4
FALSE	High	IsMasterProtein	P61160	Actin-related protein 2 OS=Homo sapiens GN=ACTR2 PE=1 SV=1	FALSE	0	16.465	22.5888	5	6	5	1	394	44.7	6.74	High	High	High	High		10097	ENSG00000138071.13	ACTR2	2	cell division;cell organization and biogenesis;cellular component movement;regulation of biological process;response to stimulus;transport	cytoplasm;cytoskeleton;cytosol;extracellular;membrane;organelle lumen	nucleotide binding;protein binding;structural molecule activity	Pf00022	1.542	4.019	0.62	2.01	2.76469e+06	4.26189e+06	1740809	6.99649e+06	2	2	2	2	0.874	0	5.26	5
FALSE	High	IsMasterProtein	P17096	High mobility group protein HMG-I/HMG-Y OS=Homo sapiens GN=HMGA1 PE=1 SV=3	FALSE	0	16.432	41.1215	3	6	3	1	107	11.7	10.32	Peak Found	High	Peak Found	High		3159	ENSG00000137309.19	HMGA1	6	cell organization and biogenesis;metabolic process;regulation of biological process;response to stimulus;transport	chromosome;cytosol;nucleus	catalytic activity;DNA binding;protein binding		25.464	23.312	4.67	4.54	6.10349e+06	1.55417e+08	231525	5.39731e+06	3	3	1	1	3.642	0	11.58	3
FALSE	High	IsMasterProtein	Q9NZI8	Insulin-like growth factor 2 mRNA-binding protein 1 OS=Homo sapiens GN=IGF2BP1 PE=1 SV=2	FALSE	0	16.417	11.2652	5	7	4	1	577	63.4	9.2	High	Peak Found	Not Found	Not Found	Dimethyl [K465; K475; K483]	10642	ENSG00000159217.9	IGF2BP1	17	cell proliferation;metabolic process;regulation of biological process;transport	cytoplasm;cytosol;nucleus	nucleotide binding;protein binding;RNA binding;translation regulator activity	Pf00013, Pf00076, Pf13014, Pf13893, Pf14259	0.296	0.01	-1.76	-6.64	2.60494e+07	7.70416e+06	1.20991e+06		5	5	1		0.468	2	4.8	5
FALSE	High	IsMasterProtein	P50991	T-complex protein 1 subunit delta OS=Homo sapiens GN=CCT4 PE=1 SV=4	FALSE	0	16.351	22.449	8	10	7	1	539	57.9	7.83	High	Peak Found	High	Peak Found	Dimethyl [K79; K96; K193; K257]	10575	ENSG00000115484.14	CCT4	2	metabolic process;regulation of biological process;transport	cytoplasm;cytoskeleton;cytosol	nucleotide binding;protein binding;RNA binding	Pf00118	0.106	0.139	-3.24	-2.85	2.08296e+07	2.20669e+06	4.31564e+06	600233	7	4	1	1	0.624	1	0	8
FALSE	High	IsMasterProtein	P01860	Ig gamma-3 chain C region OS=Homo sapiens GN=IGHG3 PE=1 SV=2	FALSE	0	16.226	5.03979	3	25	3	1	377	41.3	7.9	High	High	High	High	Dimethyl [K264; K268]	3502		IGHG3	14	cell organization and biogenesis;defense response;metabolic process;regulation of biological process;response to stimulus	extracellular;membrane	catalytic activity;protein binding	Pf07654, Pf08205	100	0.393	6.64	-1.35	1.21775e+07	3.47676e+09	2.54638e+10	1.00071e+10	3	4	3	3	1.448	0	16.39	3
FALSE	High	IsMasterProtein	Q96HS1	Serine/threonine-protein phosphatase PGAM5, mitochondrial OS=Homo sapiens GN=PGAM5 PE=1 SV=2	FALSE	0	16.128	27.3356	5	8	5	1	289	32	8.68	High	High	High	High	Dimethyl [K116]	192111	ENSG00000247077.6	PGAM5	12	cell death;metabolic process;regulation of biological process;response to stimulus	membrane;mitochondrion	catalytic activity;enzyme regulator activity;protein binding;signal transducer activity	Pf00300	3.281	1.88	1.71	0.91	2.69785e+07	8.85269e+07	9.87407e+06	1.85635e+07	5	5	1	1	1.336	0	5.95	5
FALSE	High	IsMasterProtein	P62266	40S ribosomal protein S23 OS=Homo sapiens GN=RPS23 PE=1 SV=3	FALSE	0	16.116	34.965	3	8	3	1	143	15.8	10.49	High	High	High	High	Dimethyl [K108; K135]	6228	ENSG00000186468.12	RPS23	5	cell organization and biogenesis;metabolic process;transport	cytosol;membrane;ribosome	protein binding;RNA binding;structural molecule activity	Pf00164	0.477	0.708	-1.07	-0.5	2.95186e+07	1.40927e+07	2.96153e+07	2.09574e+07	2	2	3	3	3.217	0	6.99	3
FALSE	High	IsMasterProtein	P22061-2	Isoform 2 of Protein-L-isoaspartate(D-aspartate) O-methyltransferase OS=Homo sapiens GN=PCMT1	FALSE	0	16.093	24.5614	4	7	4	1	228	24.7	6.52	Peak Found	High	High	High	Dimethyl [K27; K197; K204]	5110		PCMT1	6	metabolic process	cytoplasm;cytosol	catalytic activity;protein binding	Pf01135, Pf01209, Pf05175, Pf06325, Pf08241, Pf12847, Pf13489, Pf13659, Pf13847		0.543		-0.88			2.54217e+07	1.38072e+07			4	4	2.455	0	2.93	4
FALSE	High	IsMasterProtein	Q9BUP0	EF-hand domain-containing protein D1 OS=Homo sapiens GN=EFHD1 PE=1 SV=1	FALSE	0	16.019	26.3598	5	9	3	1	239	26.9	5.39	Peak Found	High	High	High	Dimethyl [K116; K186]	80303	ENSG00000115468.11	EFHD1	2	cell organization and biogenesis	membrane;mitochondrion	metal ion binding	Pf13499	0.93	0.866	-0.11	-0.21	3.45045e+06	3.20786e+06	2.03101e+07	17580316	1	1	3	3	1.448	0	4.9	5
FALSE	High	IsMasterProtein	P62888	60S ribosomal protein L30 OS=Homo sapiens GN=RPL30 PE=1 SV=2	FALSE	0	15.826	50.4348	4	9	4	1	115	12.8	9.63	High	High	High	High	Dimethyl [K68; K87]	6156	ENSG00000156482.10	RPL30	8	cell organization and biogenesis;metabolic process;transport	cytosol;membrane;nucleus;ribosome	protein binding;RNA binding;structural molecule activity	Pf01248	0.417	0.874	-1.26	-0.19	5.25674e+07	2.19123e+07	2.4796e+07	21678422	4	4	3	3	6.499	0	2.25	4
FALSE	High	IsMasterProtein	Q99700	Ataxin-2 OS=Homo sapiens GN=ATXN2 PE=1 SV=2	FALSE	0	15.764	6.62605	6	8	6	1	1313	140.2	9.57	High	Not Found	High	Not Found	Dimethyl [K331; K341; K455; K821; K893]	6311	ENSG00000204842.14	ATXN2	12	cell organization and biogenesis;metabolic process;regulation of biological process;transport	cytoplasm;Golgi;membrane	protein binding;RNA binding	Pf06741, Pf07145, Pf09770, Pf14438	0.01	0.01	-6.64	-6.64	9.10215e+06		5.18314e+06		4		3		0.318	0	0	6
FALSE	High	IsMasterProtein	P84098	60S ribosomal protein L19 OS=Homo sapiens GN=RPL19 PE=1 SV=1	FALSE	0	15.608	9.18367	2	6	2	1	196	23.5	11.47	Peak Found	High	High	High		6143	ENSG00000108298.9	RPL19	17	cell organization and biogenesis;metabolic process;transport	cytosol;membrane;ribosome	protein binding;RNA binding;structural molecule activity	Pf01280	0.505	1.6	-0.99	0.68	5.30435e+06	2.67923e+06	2.28003e+07	3.6487e+07	1	1	1	2	2.594	0	4.75	2
FALSE	High	IsMasterProtein	Q99497	Protein deglycase DJ-1 OS=Homo sapiens GN=PARK7 PE=1 SV=2	FALSE	0	15.148	34.3915	4	8	4	1	189	19.9	6.79	High	High	High	High	Dimethyl [K41; K62; K63; K89]	11315	ENSG00000116288.12	PARK7	1	cell communication;cell organization and biogenesis;defense response;metabolic process;regulation of biological process;response to stimulus;transport	chromosome;cytoplasm;cytosol;endoplasmic reticulum;membrane;mitochondrion;nucleus;organelle lumen	antioxidant activity;catalytic activity;DNA binding;enzyme regulator activity;metal ion binding;protein binding;RNA binding	Pf01965, Pf13278	0.695	0.72	-0.53	-0.47	1.53989e+07	1.06991e+07	2.20523e+07	1.58746e+07	3	3	4	4	1.424	0	2.06	4
FALSE	High	IsMasterProtein	P46782	40S ribosomal protein S5 OS=Homo sapiens GN=RPS5 PE=1 SV=4	FALSE	0	14.922	12.2549	2	5	2	1	204	22.9	9.72	High	Peak Found	High	Peak Found	Dimethyl [K182]	6193	ENSG00000083845.8	RPS5	19	cell organization and biogenesis;metabolic process;regulation of biological process;transport	cytosol;membrane;ribosome	protein binding;RNA binding;structural molecule activity	Pf00177	0.449	0.621	-1.16	-0.69	9.80415e+06	4.39961e+06	6.9411e+06	4.30758e+06	2	2	1	1	0.995	0	5.56	2
FALSE	High	IsMasterProtein	O95834-3	Isoform 3 of Echinoderm microtubule-associated protein-like 2 OS=Homo sapiens GN=EML2	FALSE	0	14.881	9.41176	7	10	7	1	850	92	7.06	High	Not Found	High	Not Found	Dimethyl [K91; K310; K528; K797]	24139	ENSG00000125746.16	EML2	19	regulation of biological process	cytoplasm	protein binding	Pf00400, Pf03451	0.01	0.01	-6.64	-6.64	1.29147e+07		1.24975e+07		4		5		0.409	0	2.05	7
FALSE	High	IsMasterProtein	Q14444	Caprin-1 OS=Homo sapiens GN=CAPRIN1 PE=1 SV=2	FALSE	0	14.578	10.4372	5	7	5	1	709	78.3	5.25	High	Peak Found	High	Peak Found	Dimethyl [K98; K110; K125; K158; K191]	4076	ENSG00000135387.20	CAPRIN1	11	cell differentiation;regulation of biological process	cytoplasm;cytosol;membrane	protein binding;RNA binding	Pf12287	0.278	0.587	-1.85	-0.77	4.05176e+07	1.12777e+07	3.76454e+06	2.21026e+06	4	4	2	2	0.557	0	4	5
FALSE	High	IsMasterProtein	Q08211	ATP-dependent RNA helicase A OS=Homo sapiens GN=DHX9 PE=1 SV=4	FALSE	0	14.522	4.88189	5	7	5	1	1270	140.9	6.84	High	High	High	Peak Found	Dimethyl [K14]	1660	ENSG00000135829.16	DHX9	1	cell differentiation;metabolic process;regulation of biological process	cytoplasm;cytosol;membrane;nucleus	catalytic activity;DNA binding;nucleotide binding;protein binding;RNA binding	Pf00035, Pf00270, Pf00271, Pf04408, Pf07717	1.068	0.627	0.09	-0.67	10012020	1.06931e+07	1.60719e+07	1.00724e+07	2	3	4	3	0.159	0	4.14	5
FALSE	High	IsMasterProtein	Q08380	Galectin-3-binding protein OS=Homo sapiens GN=LGALS3BP PE=1 SV=1	FALSE	0	14.426	15.5556	6	7	6	1	585	65.3	5.27	High	Peak Found	High	Peak Found	Dimethyl [K323; K345]	3959	ENSG00000108679.12	LGALS3BP	17	defense response;regulation of biological process;response to stimulus;transport	extracellular;membrane;organelle lumen	protein binding;receptor activity	Pf00530, Pf07707	0.206	0.206	-2.28	-2.28	1.02518e+07	2.10911e+06	6.82292e+06	1.40262e+06	4	3	2	1	0.52	0	2.07	6
FALSE	High	IsMasterProtein	Q7Z4S6-4	Isoform 4 of Kinesin-like protein KIF21A OS=Homo sapiens GN=KIF21A	FALSE	0	14.181	4.65672	5	5	5	1	1675	187.2	6.42	Not Found	Not Found	High	Not Found	Dimethyl [K269; K314; K505; K1051]	55605		KIF21A	12	cell organization and biogenesis;cellular component movement;metabolic process;regulation of biological process;transport	cytoplasm	catalytic activity;motor activity;nucleotide binding;protein binding;structural molecule activity	Pf00038, Pf00225, Pf00400, Pf00769, Pf01576, Pf02050, Pf02463, Pf02841, Pf02996, Pf03938, Pf03962, Pf04111, Pf05010, Pf05483, Pf05557, Pf05622, Pf07926, Pf09731, Pf10174, Pf10211, Pf11600, Pf12037, Pf12128, Pf12718, Pf13166, Pf13514, Pf13863, Pf13868, Pf14943, Pf14988, Pf15558, Pf15619		0.01		-6.64			6.51e+06				5		0.145	0	0	5
FALSE	High	IsMasterProtein	Q9Y2X3	Nucleolar protein 58 OS=Homo sapiens GN=NOP58 PE=1 SV=1	FALSE	0	14.103	8.31758	3	4	3	1	529	59.5	8.92	Not Found	Not Found	High	High	Dimethyl [K67]	51602	ENSG00000055044.10	NOP58	2	cell growth;metabolic process;transport	cytosol;membrane;nucleus	protein binding;RNA binding	Pf01798, Pf08060, Pf08156		3.371		1.75			1.62714e+06	5.48566e+06			2	2	0.359	0	4.76	3
FALSE	High	IsMasterProtein	P60842	Eukaryotic initiation factor 4A-I OS=Homo sapiens GN=EIF4A1 PE=1 SV=1	FALSE	0	14.043	18.2266	5	8	4	1	406	46.1	5.48	Not Found	Not Found	High	Peak Found	Dimethyl [K54; K82; K193; K202]	1973	ENSG00000161960.14	EIF4A1	17	metabolic process;regulation of biological process	cytoplasm;cytosol;membrane;nucleus	catalytic activity;DNA binding;nucleotide binding;protein binding;RNA binding	Pf00270, Pf00271, Pf04851	0.794	0.575	-0.33	-0.8	1.93094e+07	1.53408e+07	3.41182e+07	1.96349e+07	1	1	3	2	0.778	2	2.11	5
FALSE	High	IsMasterProtein	P63208	S-phase kinase-associated protein 1 OS=Homo sapiens GN=SKP1 PE=1 SV=2	FALSE	0	13.841	33.7423	3	5	3	1	163	18.6	4.54	High	Peak Found	High	Not Found	Dimethyl [K56; K113; K121]	6500	ENSG00000113558.18	SKP1	5	cell organization and biogenesis;metabolic process;regulation of biological process;response to stimulus	cytoplasm;cytosol;nucleus	catalytic activity;protein binding	Pf01466, Pf03931	0.101	0.01	-3.31	-6.64	9.21319e+06	929407	396075		2	1	1		0.778	0	10.18	3
FALSE	High	IsMasterProtein	O95425	Supervillin OS=Homo sapiens GN=SVIL PE=1 SV=2	FALSE	0	13.793	5.32972	6	6	6	1	2214	247.6	6.98	Peak Found	High	Not Found	Not Found		6840	ENSG00000197321.14	SVIL	10	cell organization and biogenesis;regulation of biological process	cytoplasm;cytoskeleton;cytosol;membrane;nucleus	protein binding	Pf00626, Pf02209	2.78		1.48		7.8522e+06	2.18295e+07			3	6			0.111	0	2.48	6
FALSE	High	IsMasterProtein	P46781	40S ribosomal protein S9 OS=Homo sapiens GN=RPS9 PE=1 SV=3	FALSE	0	13.777	16.4948	5	11	5	1	194	22.6	10.65	High	High	High	High	Dimethyl [K93; K101; K139]	6203	ENSG00000274005.3; ENSG00000275323.3; ENSG00000277079.3; ENSG00000278081.3; ENSG00000277359.3; ENSG00000170889.13; ENSG00000274950.4; ENSG00000274626.3; ENSG00000278270.4; ENSG00000274646.4	RPS9	19; CHR_HSCHR19LRC_LRC_T_CTG3_1; CHR_HSCHR19LRC_LRC_J_CTG3_1; CHR_HSCHR19LRC_PGF2_CTG3_1; CHR_HSCHR19LRC_LRC_S_CTG3_1; CHR_HSCHR19LRC_LRC_I_CTG3_1; CHR_HSCHR19LRC_PGF1_CTG3_1; CHR_HSCHR19LRC_COX2_CTG3_1; CHR_HSCHR19_4_CTG3_1; CHR_HSCHR19LRC_COX1_CTG3_1	cell organization and biogenesis;metabolic process;regulation of biological process;transport	cytoplasm;cytosol;membrane;nucleus;ribosome	protein binding;RNA binding;structural molecule activity;translation regulator activity	Pf00163, Pf01479	0.634	0.918	-0.66	-0.12	2.77745e+07	1.76018e+07	1.8674e+07	1.71353e+07	5	5	4	4	2.728	0	1.6	5
FALSE	High	IsMasterProtein	Q16629	Serine/arginine-rich splicing factor 7 OS=Homo sapiens GN=SRSF7 PE=1 SV=1	FALSE	0	13.605	17.2269	3	8	3	1	238	27.4	11.82	High	High	High	High		6432	ENSG00000115875.18	SRSF7	2	metabolic process;regulation of biological process;transport	cytoplasm;nucleus	metal ion binding;nucleotide binding;protein binding;RNA binding	Pf00076, Pf13893, Pf14259	0.737	1.622	-0.44	0.7	4.21562e+07	3.10841e+07	2.27387e+07	3.6893e+07	2	2	3	3	1.371	0	3.78	3
FALSE	High	IsMasterProtein	O14980	Exportin-1 OS=Homo sapiens GN=XPO1 PE=1 SV=1	FALSE	0	13.448	7.46965	5	6	5	1	1071	123.3	6.06	High	Not Found	High	Not Found	Dimethyl [K54; K88; K190; K674]	7514	ENSG00000082898.16	XPO1	2	cell organization and biogenesis;regulation of biological process;response to stimulus;transport	chromosome;cytoplasm;cytosol;membrane;nucleus	protein binding;RNA binding;transporter activity	Pf03810, Pf08389, Pf08767	0.01	0.01	-6.64	-6.64	2.73964e+06		2.21995e+06		3		3		0.215	0	4.69	5
FALSE	High	IsMasterProtein	CON_P35908	SWISS-PROT P35908 Tax_Id=9606 Gene_Symbol=KRT2 Keratin, type II cytoskeletal 2 epidermal	TRUE	0	13.093	5.5814	3	6	2	1	645	65.8	8	High	High	High	High	Dimethyl [K215; K320; K359]									0.727	0.609	-0.46	-0.72	1.17481e+07	8.54003e+06	6.61038e+06	4.02436e+06	2	2	1	1	0.239	0	11.6	3
FALSE	High	IsMasterProtein	Q13263	Transcription intermediary factor 1-beta OS=Homo sapiens GN=TRIM28 PE=1 SV=5	FALSE	0	13.031	11.976	6	6	6	1	835	88.5	5.77	High	Peak Found	High	Not Found	Dimethyl [K507]	10155	ENSG00000130726.11	TRIM28	19	cell organization and biogenesis;defense response;metabolic process;regulation of biological process;response to stimulus	chromosome;nucleus	catalytic activity;DNA binding;metal ion binding;protein binding;RNA binding	Pf00628, Pf00643	0.149	0.01	-2.74	-6.64	5.62595e+06	841069	1.32398e+06		3	1	1		0.401	0	2.17	6
FALSE	High	IsMasterProtein	P02545	Prelamin-A/C OS=Homo sapiens GN=LMNA PE=1 SV=1	FALSE	0	12.844	10.5422	6	7	6	1	664	74.1	7.02	High	High	High	Peak Found	Dimethyl [K450]	4000	ENSG00000160789.19	LMNA	1	cell organization and biogenesis;regulation of biological process;response to stimulus;transport	cytosol;membrane;nucleus	protein binding;structural molecule activity	Pf00038, Pf00932	0.434	0.36	-1.2	-1.47	2.26626e+07	9.83732e+06	6.79848e+06	2.44802e+06	4	5	1	1	0.292	0	0	6
FALSE	High	IsMasterProtein	Q96EY1	DnaJ homolog subfamily A member 3, mitochondrial OS=Homo sapiens GN=DNAJA3 PE=1 SV=2	FALSE	0	12.826	9.79167	3	6	3	1	480	52.5	9.26	High	Peak Found	High	Peak Found		9093	ENSG00000276726.4; ENSG00000103423.13	DNAJA3	16; CHR_HSCHR16_3_CTG1	cell death;cell differentiation;cell organization and biogenesis;metabolic process;regulation of biological process;response to stimulus	cytoplasm;cytosol;membrane;mitochondrion;nucleus;organelle lumen	enzyme regulator activity;metal ion binding;nucleotide binding;protein binding	Pf00226, Pf00684, Pf01556	0.161	0.181	-2.64	-2.47	1.58302e+07	2.54137e+06	7.3833e+06	1.33469e+06	3	3	2	2	0.304	0	10.37	3
FALSE	High	IsMasterProtein	P46940	Ras GTPase-activating-like protein IQGAP1 OS=Homo sapiens GN=IQGAP1 PE=1 SV=1	FALSE	0	12.685	2.71575	3	5	3	1	1657	189.1	6.48	Not Found	Not Found	High	High	Dimethyl [K130; K556; K1077]	8826	ENSG00000140575.12	IQGAP1	15	cell growth;regulation of biological process;response to stimulus;transport	cytoplasm;cytoskeleton;cytosol;membrane;nucleus	enzyme regulator activity;metal ion binding;protein binding	Pf00307, Pf00397, Pf00616, Pf03836, Pf11016		0.996		-0.01			3.29693e+06	3.2838e+06			3	3	0.129	0	2.06	3
FALSE	High	IsMasterProtein	P53999	Activated RNA polymerase II transcriptional coactivator p15 OS=Homo sapiens GN=SUB1 PE=1 SV=3	FALSE	0	12.607	25.9843	4	5	4	1	127	14.4	9.6	High	Peak Found	High	Not Found	Dimethyl [K68; K114]	10923	ENSG00000113387.11	SUB1	5	metabolic process;regulation of biological process;response to stimulus	nucleus	DNA binding;protein binding;RNA binding	Pf02229	0.057	0.01	-4.13	-6.64	5.54444e+07	3.15824e+06	1.20979e+07		3	2	2		1.512	0	5.96	4
FALSE	High	IsMasterProtein	P49327	Fatty acid synthase OS=Homo sapiens GN=FASN PE=1 SV=3	FALSE	0	12.593	2.42931	4	5	4	1	2511	273.3	6.44	High	Peak Found	High	Not Found		2194	ENSG00000169710.8	FASN	17	cell differentiation;metabolic process;regulation of biological process;response to stimulus	cytoplasm;cytosol;Golgi;membrane;mitochondrion	catalytic activity;nucleotide binding;protein binding;RNA binding	Pf00106, Pf00107, Pf00108, Pf00109, Pf00698, Pf00975, Pf02801, Pf08242, Pf08659, Pf13602, Pf14765	0.034	0.01	-4.87	-6.64	4.16873e+06	142574	2.34965e+06		3	1	2		0.069	0	3.73	4
FALSE	High	IsMasterProtein	Q8NEN9	PDZ domain-containing protein 8 OS=Homo sapiens GN=PDZD8 PE=1 SV=1	FALSE	0	12.571	6.15251	5	6	5	1	1154	128.5	6.09	Not Found	High	Not Found	High		118987	ENSG00000165650.11	PDZD8	10	cell organization and biogenesis;regulation of biological process;response to stimulus	membrane	metal ion binding;protein binding	Pf00130, Pf00595, Pf13180	100		6.64			1.5445e+07				4			0.191	0	4.7	5
FALSE	High	IsMasterProtein	P51114	Fragile X mental retardation syndrome-related protein 1 OS=Homo sapiens GN=FXR1 PE=1 SV=3	FALSE	0	12.512	6.76329	3	5	3	1	621	69.7	6.15	High	High	Peak Found	High		8087	ENSG00000114416.17	FXR1	3	cell death;cell differentiation;development;regulation of biological process	cytoplasm;cytosol;membrane;nucleus	protein binding;RNA binding	Pf00013, Pf05641, Pf12235, Pf13014	0.897	2.349	-0.16	1.23	2.18523e+06	1.95923e+06	4.9456e+06	1.1619e+07	1	1	2	2	0.266	0	2.9	3
FALSE	High	IsMasterProtein	P48643	T-complex protein 1 subunit epsilon OS=Homo sapiens GN=CCT5 PE=1 SV=1	FALSE	0	12.496	20.1479	7	8	6	1	541	59.6	5.66	High	Peak Found	High	Peak Found	Dimethyl [K160; K170; K259; K261; K265; K275; K368; K378]	22948	ENSG00000150753.11	CCT5	5	metabolic process;regulation of biological process;response to stimulus;transport	cytoplasm;cytoskeleton;cytosol	nucleotide binding;protein binding	Pf00118	0.049	0.049	-4.34	-4.35	7.62785e+06	376440	8.70651e+06	427315	2	1	4	2	0.528	0	0	7
FALSE	High	IsMasterProtein	O14974	Protein phosphatase 1 regulatory subunit 12A OS=Homo sapiens GN=PPP1R12A PE=1 SV=1	FALSE	0	12.455	6.1165	4	4	4	1	1030	115.2	5.4	High	High	Not Found	Not Found	Dimethyl [K961]	4659	ENSG00000058272.16	PPP1R12A	12	cell organization and biogenesis;metabolic process;regulation of biological process;response to stimulus	chromosome;cytoplasm;cytoskeleton;cytosol	enzyme regulator activity;protein binding;signal transducer activity	Pf00023, Pf03961, Pf12796, Pf13606, Pf13637, Pf13857	7.984		3		2.30279e+06	1.83845e+07			1	4			0.179	0	5.01	4
FALSE	High	IsMasterProtein	P04792	Heat shock protein beta-1 OS=Homo sapiens GN=HSPB1 PE=1 SV=2	FALSE	0	12.373	28.2927	4	5	4	1	205	22.8	6.4	High	Peak Found	High	Peak Found	Dimethyl [K112]	3315	ENSG00000106211.8	HSPB1	7	cellular component movement;metabolic process;regulation of biological process;response to stimulus	cytoplasm;cytoskeleton;cytosol;membrane;nucleus;proteasome	enzyme regulator activity;protein binding;RNA binding	Pf00011	0.177	0.285	-2.5	-1.81	7.39223e+07	1.30602e+07	2.60434e+07	7.42547e+06	3	3	1	1	1.031	0	6.4	4
FALSE	High	IsMasterProtein	Q9UJS0-2	Isoform 2 of Calcium-binding mitochondrial carrier protein Aralar2 OS=Homo sapiens GN=SLC25A13	FALSE	0	12.326	8.87574	4	5	3	1	676	74.3	8.62	High	Not Found	High	Not Found	Dimethyl [K354; K406; K485; K509]	10165	ENSG00000004864.13	SLC25A13	7	metabolic process;response to stimulus;transport	membrane;mitochondrion	metal ion binding;transporter activity	Pf00153, Pf13499	0.01	0.01	-6.64	-6.64	4.29841e+06		1.33239e+06		3		2		0.274	1	6.54	4
FALSE	High	IsMasterProtein	P52292	Importin subunit alpha-1 OS=Homo sapiens GN=KPNA2 PE=1 SV=1	FALSE	0	12.279	8.69565	3	5	3	1	529	57.8	5.4	High	Peak Found	High	Peak Found		3838	ENSG00000182481.8	KPNA2	17	metabolic process;regulation of biological process;transport	cytoplasm;cytosol;membrane;nucleus	protein binding;RNA binding;transporter activity	Pf00514, Pf01749, Pf13513, Pf13646	0.242	0.305	-2.05	-1.71	9260363	2.23652e+06	1.38318e+07	4.22478e+06	2	2	2	2	0.374	0	5.6	3
FALSE	High	IsMasterProtein	P30048	Thioredoxin-dependent peroxide reductase, mitochondrial OS=Homo sapiens GN=PRDX3 PE=1 SV=3	FALSE	0	12.2	21.0938	4	5	4	1	256	27.7	7.78	High	Peak Found	High	Not Found	Dimethyl [K166; K196]	10935	ENSG00000165672.6	PRDX3	10	cell death;cell differentiation;cell organization and biogenesis;cellular homeostasis;metabolic process;regulation of biological process;response to stimulus	cytoplasm;cytosol;endosome;mitochondrion;organelle lumen	antioxidant activity;catalytic activity;enzyme regulator activity;protein binding	Pf00578, Pf08534, Pf10417, Pf13905	0.058	0.01	-4.11	-6.64	6.50733e+06	377231	6.38058e+06		2	1	3		0.931	0	9.03	4
FALSE	High	IsMasterProtein	Q0ZGT2-2	Isoform 2 of Nexilin OS=Homo sapiens GN=NEXN	FALSE	0	12.172	9.81873	5	6	5	1	662	79.3	5.34	High	High	High	High	Dimethyl [K163; K180; K359]	91624		NEXN	1	regulation of biological process	cytoskeleton	protein binding;structural molecule activity	Pf00047, Pf07679, Pf13895	4.215	2.048	2.08	1.03	3.60149e+06	1.5181e+07	3.86773e+06	7.91919e+06	2	3	2	2	0.401	0	1.98	5
FALSE	High	IsMasterProtein	Q9P0K7-2	Isoform 2 of Ankycorbin OS=Homo sapiens GN=RAI14	FALSE	0	12.13	7.32452	6	6	6	1	983	110.4	6.11	High	High	Not Found	Not Found	Dimethyl [K656]	26064	ENSG00000039560.13	RAI14	5	metabolic process	cytoskeleton;cytosol;mitochondrion;nucleus	protein binding	Pf00023, Pf03961, Pf04111, Pf12796, Pf13166, Pf13606, Pf13637, Pf13857	1.951		0.96		1.24012e+07	2.41956e+07			5	6			0.218	0	4.31	6
FALSE	High	IsMasterProtein	P84090	Enhancer of rudimentary homolog OS=Homo sapiens GN=ERH PE=1 SV=1	FALSE	0	12.031	30.7692	2	7	2	1	104	12.3	5.92	High	High	Peak Found	High	Dimethyl [K84; K88]	2079	ENSG00000100632.10	ERH	14	metabolic process;regulation of biological process		DNA binding;nucleotide binding;protein binding;RNA binding	Pf01133	0.763	12.879	-0.39	3.69	9.67515e+07	7.37977e+07	7.88282e+06	1.01527e+08	2	2	2	2	1.683	0	3.56	2
FALSE	High	IsMasterProtein	Q02218	2-oxoglutarate dehydrogenase, mitochondrial OS=Homo sapiens GN=OGDH PE=1 SV=3	FALSE	0	11.985	5.96285	4	6	4	1	1023	115.9	6.86	Peak Found	High	Peak Found	High		4967	ENSG00000105953.14	OGDH	7	cellular component movement;metabolic process	cytosol;membrane;mitochondrion;organelle lumen	catalytic activity;metal ion binding;protein binding	Pf00676, Pf02779	12.254	5.259	3.62	2.39	509155	6.23916e+06	595766	3133114	1	3	1	2	0.186	0	4.84	4
FALSE	High	IsMasterProtein	P33993	DNA replication licensing factor MCM7 OS=Homo sapiens GN=MCM7 PE=1 SV=4	FALSE	0	11.646	6.9541	3	6	3	1	719	81.3	6.46	High	Peak Found	High	Peak Found		4176	ENSG00000166508.17	MCM7	7	cell proliferation;metabolic process;regulation of biological process;response to stimulus	chromosome;cytosol;membrane;nucleus	catalytic activity;DNA binding;nucleotide binding;protein binding	Pf00493, Pf07728, Pf14551	0.06	0.01	-4.06	-6.64	5.48569e+06	329722	2.39401e+06		2	1	2		0.151	0	10.21	3
FALSE	High	IsMasterProtein	Q12904-2	Isoform 2 of Aminoacyl tRNA synthase complex-interacting multifunctional protein 1 OS=Homo sapiens GN=AIMP1	FALSE	0	11.604	15.1786	3	4	3	1	336	37	8.65	High	Peak Found	High	Peak Found	Dimethyl [K50; K191]	9255	ENSG00000164022.16	AIMP1	4	cell communication;cell death;cellular component movement;defense response;metabolic process;regulation of biological process;response to stimulus	cell surface;cytosol;endoplasmic reticulum;Golgi;membrane;nucleus	protein binding;RNA binding	Pf01588	0.168	0.151	-2.58	-2.72	8.36763e+06	1.40371e+06	1.29049e+07	1.95316e+06	1	1	2	2	0.389	0	5.53	3
FALSE	High	IsMasterProtein	Q01650	Large neutral amino acids transporter small subunit 1 OS=Homo sapiens GN=SLC7A5 PE=1 SV=2	FALSE	0	11.494	2.76134	1	2	1	1	507	55	7.72	High	High	Not Found	Not Found	Dimethyl [K19]	8140	ENSG00000103257.8	SLC7A5	16	cell differentiation;cellular component movement;development;metabolic process;transport	cytoplasm;cytosol;membrane	transporter activity	Pf00324, Pf13520	0.136		-2.88		2.49727e+07	3.39252e+06			1	1			0.259	0	3.1	1
FALSE	High	IsMasterProtein	Q9GZY8	Mitochondrial fission factor OS=Homo sapiens GN=MFF PE=1 SV=1	FALSE	0	11.43	13.4503	2	5	2	1	342	38.4	8.95	Not Found	High	Not Found	High		56947	ENSG00000168958.19	MFF	2	cell organization and biogenesis;regulation of biological process;transport	membrane;mitochondrion	protein binding	Pf05644		100		6.64				1.07627e+07				2	0.468	0	8.81	2
FALSE	High	IsMasterProtein	P62314	Small nuclear ribonucleoprotein Sm D1 OS=Homo sapiens GN=SNRPD1 PE=1 SV=1	FALSE	0	11.411	27.7311	2	5	2	1	119	13.3	11.56	High	High	High	High	Dimethyl [K86]	6632	ENSG00000167088.10	SNRPD1	18	cell organization and biogenesis;metabolic process;transport	cytoplasm;cytosol;nucleus;spliceosomal complex	protein binding;RNA binding	Pf01423	0.686	0.758	-0.54	-0.4	7.97536e+06	5.47158e+06	2.46406e+06	1.86749e+06	1	1	1	1	9	0	5.28	2
FALSE	High	IsMasterProtein	CON_Q1RMK2	TREMBL Q1RMK2 (Bos taurus) IGHM protein	TRUE	0	11.385	7.03518	3	5	3	1	597	65	5.97	High	Peak Found	High	High	Dimethyl [K289]									0.684	0.999	-0.55	0	3.10608e+06	2.12508e+06	5.06278e+06	5.05703e+06	1	1	3	3	0.403	0	2.6	3
FALSE	High	IsMasterProtein	O95816	BAG family molecular chaperone regulator 2 OS=Homo sapiens GN=BAG2 PE=1 SV=1	FALSE	0	11.373	29.3839	4	7	4	1	211	23.8	6.7	High	High	High	Peak Found	Dimethyl [K53; K132; K168; K169]	9532	ENSG00000112208.11	BAG2	6	metabolic process;regulation of biological process	cytosol	enzyme regulator activity;nucleotide binding;protein binding	Pf02179	0.33	0.237	-1.6	-2.08	2.47853e+07	8.19061e+06	2.10972e+07	4.99052e+06	2	2	3	2	1.371	0	0	4
FALSE	High	IsMasterProtein	P05388	60S acidic ribosomal protein P0 OS=Homo sapiens GN=RPLP0 PE=1 SV=1	FALSE	0	11.306	16.7192	4	4	4	1	317	34.3	5.97	High	Peak Found	High	Peak Found	Dimethyl [K26; K38; K92; K134]	6175	ENSG00000089157.15	RPLP0	12	cell organization and biogenesis;metabolic process;response to stimulus;transport	cytoplasm;cytosol;endoplasmic reticulum;membrane;nucleus;ribosome	protein binding;RNA binding;structural molecule activity	Pf00428, Pf00466	0.171	0.638	-2.55	-0.65	9.67311e+06	1.64927e+06	9.82217e+06	6.26926e+06	2	1	2	2	0.624	0	3.76	4
FALSE	High	IsMasterProtein	P62851	40S ribosomal protein S25 OS=Homo sapiens GN=RPS25 PE=1 SV=1	FALSE	0	11.285	16	3	6	3	1	125	13.7	10.11	High	High	High	High	Dimethyl [K43; K52; K94]	6230	ENSG00000280831.2; ENSG00000118181.10	RPS25	11; CHR_HG2217_PATCH	cell organization and biogenesis;metabolic process;transport	cytosol;nucleus;ribosome	catalytic activity;nucleotide binding;protein binding;RNA binding	Pf03297	0.479	0.55	-1.06	-0.86	9.76184e+07	4.67679e+07	1.02234e+07	5.62188e+06	3	3	1	1	5.813	0	3.92	3
FALSE	High	IsMasterProtein	Q01844-5	Isoform 5 of RNA-binding protein EWS OS=Homo sapiens GN=EWSR1	FALSE	0	11.239	8.32073	3	3	3	1	661	68.9	9.29	High	Peak Found	Not Found	Not Found	Dimethyl [K409]	2130	ENSG00000182944.17	EWSR1	22	metabolic process;regulation of biological process	cytoplasm;membrane;nucleus	metal ion binding;nucleotide binding;protein binding;RNA binding	Pf00076, Pf00641, Pf14259	0.251		-2		2.30981e+07	5.79126e+06			3	3			0.35	0	3.53	3
FALSE	High	IsMasterProtein	Q96IZ0	PRKC apoptosis WT1 regulator protein OS=Homo sapiens GN=PAWR PE=1 SV=1	FALSE	0	11.236	11.1765	3	3	3	1	340	36.5	5.41	Peak Found	High	Not Found	Not Found		5074	ENSG00000177425.10	PAWR	12	cell death;cell organization and biogenesis;metabolic process;regulation of biological process;response to stimulus;transport	cytoplasm;membrane;nucleus	protein binding;transporter activity	Pf01544, Pf05911, Pf08614	29.051		4.86		399604	11608982			1	2			0.585	0	5.45	3
FALSE	High	IsMasterProtein	P61254	60S ribosomal protein L26 OS=Homo sapiens GN=RPL26 PE=1 SV=1	FALSE	0	11.232	13.1034	3	10	3	1	145	17.2	10.55	High	High	High	High	Dimethyl [K2]	6154	ENSG00000161970.12	RPL26	17	cell organization and biogenesis;metabolic process;transport	cytosol;membrane;ribosome	protein binding;RNA binding;structural molecule activity	Pf00467	0.487	1.309	-1.04	0.39	1.53472e+08	7.47954e+07	5.78075e+07	7.56488e+07	3	3	3	3	2.594	0	11.52	3
FALSE	High	IsMasterProtein	Q15717-2	Isoform 2 of ELAV-like protein 1 OS=Homo sapiens GN=ELAVL1	FALSE	0	11.042	12.1813	3	5	3	1	353	39	9.45	High	Peak Found	High	Not Found		1994		ELAVL1	19	development;metabolic process;regulation of biological process	cytoplasm;cytosol;membrane;nucleus	nucleotide binding;protein binding;RNA binding	Pf00076, Pf13893, Pf14259	0.132	0.01	-2.92	-6.64	2.44277e+07	3.21993e+06	2.86441e+06		3	2	1		0.413	0	6.81	3
FALSE	High	IsMasterProtein	P27694	Replication protein A 70 kDa DNA-binding subunit OS=Homo sapiens GN=RPA1 PE=1 SV=2	FALSE	0	10.954	10.5519	3	3	3	1	616	68.1	7.21	Peak Found	High	Not Found	Not Found		6117	ENSG00000132383.11	RPA1	17	cell organization and biogenesis;metabolic process;regulation of biological process;response to stimulus	nucleus	DNA binding;metal ion binding;protein binding	Pf01336, Pf01485, Pf04057, Pf08646	6.558		2.71		1.78071e+06	11677216			2	3			0.205	0	7.77	3
FALSE	High	IsMasterProtein	P62979	Ubiquitin-40S ribosomal protein S27a OS=Homo sapiens GN=RPS27A PE=1 SV=2	FALSE	0	10.874	22.4359	2	4	2	1	156	18	9.64	High	Peak Found	High	High	Dimethyl [K27]	6233	ENSG00000143947.13	RPS27A	2	cell communication;cell organization and biogenesis;defense response;metabolic process;regulation of biological process;response to stimulus;transport	cytoplasm;cytosol;membrane;nucleus;ribosome	metal ion binding;protein binding;RNA binding;structural molecule activity	Pf00240, Pf01599, Pf11976, Pf13019, Pf13881, Pf14560	0.619	0.803	-0.69	-0.32	3.38186e+07	2.0934e+07	3.00773e+07	2.41543e+07	1	1	2	2	0.874	0	4.5	2
FALSE	High	IsMasterProtein	Q8WWM7-3	Isoform 3 of Ataxin-2-like protein OS=Homo sapiens GN=ATXN2L	FALSE	0	10.843	7.65725	5	5	5	1	1097	115.5	8.66	High	Peak Found	Not Found	Not Found	Dimethyl [K205; K581; K599]	11273	ENSG00000168488.18	ATXN2L	16	cell organization and biogenesis;regulation of biological process	cytosol;membrane	protein binding;RNA binding	Pf06741, Pf07145, Pf09770, Pf14438	0.129		-2.96		2.66695e+07	3.43727e+06			4	3			0.299	0	0	5
FALSE	High	IsMasterProtein	P23258	Tubulin gamma-1 chain OS=Homo sapiens GN=TUBG1 PE=1 SV=2	FALSE	0	10.791	13.969	4	4	4	1	451	51.1	6.14	High	Not Found	High	Peak Found	Dimethyl [K84]	7283	ENSG00000131462.7	TUBG1	17	cell organization and biogenesis	chromosome;cytoplasm;cytoskeleton;cytosol;endosome	catalytic activity;nucleotide binding;protein binding;structural molecule activity	Pf00091, Pf03953		0.094		-3.41			5.8028e+06	547499			3	1	0.52	0	4.51	4
FALSE	High	IsMasterProtein	P61313	60S ribosomal protein L15 OS=Homo sapiens GN=RPL15 PE=1 SV=2	FALSE	0	10.756	23.5294	4	6	4	1	204	24.1	11.62	High	High	High	High	Dimethyl [K128; K153; K157]	6138	ENSG00000174748.18	RPL15	3	cell organization and biogenesis;metabolic process;response to stimulus;transport	cytosol;membrane;nucleus;ribosome	protein binding;RNA binding;structural molecule activity	Pf00827	0.625	0.943	-0.68	-0.09	1.75789e+07	1.09827e+07	3.89646e+07	3.67303e+07	2	2	4	4	0.931	0	4.49	4
FALSE	High	IsMasterProtein	Q9UBX3-2	Isoform 2 of Mitochondrial dicarboxylate carrier OS=Homo sapiens GN=SLC25A10	FALSE	0	10.696	11.8243	2	3	2	1	296	32.1	9.35	High	Peak Found	High	Peak Found	Dimethyl [K102]	1468	ENSG00000183048.11	SLC25A10	17	metabolic process;transport	membrane;mitochondrion;nucleus	protein binding;transporter activity	Pf00153	0.073	0.087	-3.77	-3.52	3.93654e+06	287765	2.50215e+06	218795	2	1	1	1	0.274	0	3.92	2
FALSE	High	IsMasterProtein	P12081	Histidine--tRNA ligase, cytoplasmic OS=Homo sapiens GN=HARS PE=1 SV=2	FALSE	0	10.694	10.609	3	3	3	1	509	57.4	5.88	Not Found	Not Found	Not Found	High		3035	ENSG00000170445.12	HARS	5	cell organization and biogenesis;metabolic process	cytoplasm;cytosol;mitochondrion	catalytic activity;nucleotide binding	Pf00458, Pf00587, Pf03129, Pf13393		100		6.64				7.41785e+06				3	0.218	0	5.23	3
FALSE	High	IsMasterProtein	Q93008	Probable ubiquitin carboxyl-terminal hydrolase FAF-X OS=Homo sapiens GN=USP9X PE=1 SV=3	FALSE	0	10.649	2.76265	4	4	4	1	2570	292.1	5.8	High	Not Found	High	Not Found	Dimethyl [K1702]	8239	ENSG00000124486.12	USP9X	X	cell division;cell growth;cell organization and biogenesis;cellular component movement;metabolic process;regulation of biological process;response to stimulus	cytoplasm;cytosol;membrane	catalytic activity;protein binding	Pf00443, Pf09606, Pf13423	0.01	0.01	-6.64	-6.64	1.26064e+06		335374		3		1		0.067	0	0	4
FALSE	High	IsMasterProtein	Q9UJJ9	N-acetylglucosamine-1-phosphotransferase subunit gamma OS=Homo sapiens GN=GNPTG PE=1 SV=1	FALSE	0	10.623	16.7213	3	6	3	1	305	34	6.95	High	Not Found	High	Not Found	Dimethyl [K207; K220]	84572	ENSG00000090581.9	GNPTG	16	metabolic process	extracellular;Golgi;membrane	catalytic activity;protein binding	Pf07915, Pf13015	0.01	0.01	-6.64	-6.64	2.00306e+07		1.47059e+07		3		3		0.54	0	4.41	3
FALSE	High	IsMasterProtein	O95782	AP-2 complex subunit alpha-1 OS=Homo sapiens GN=AP2A1 PE=1 SV=3	FALSE	0	10.446	3.68475	3	5	3	1	977	107.5	7.03	High	High	Not Found	Not Found		160	ENSG00000196961.12	AP2A1	19	cell organization and biogenesis;cellular component movement;regulation of biological process;response to stimulus;transport	cytosol;membrane	protein binding;transporter activity	Pf01602, Pf02296, Pf02883, Pf13646	1.805		0.85		7.55467e+06	1.3639e+07			2	3			0.208	0	1.74	3
FALSE	High	IsMasterProtein	P32969	60S ribosomal protein L9 OS=Homo sapiens GN=RPL9 PE=1 SV=1	FALSE	0	10.409	15.625	3	6	3	1	192	21.9	9.95	High	High	Peak Found	High	Dimethyl [K21; K174; K184]	6133	ENSG00000163682.15	RPL9	4	cell organization and biogenesis;metabolic process;transport	cytosol;membrane;nucleus;ribosome	protein binding;RNA binding;structural molecule activity	Pf00347	0.863	2.409	-0.21	1.27	1.35202e+07	1.16709e+07	4.22255e+06	1.01735e+07	2	2	1	2	1.848	0	2	3
FALSE	High	IsMasterProtein	P63104	14-3-3 protein zeta/delta OS=Homo sapiens GN=YWHAZ PE=1 SV=1	FALSE	0	10.383	15.102	3	6	3	1	245	27.7	4.79	High	High	High	High	Dimethyl [K49]	7534	ENSG00000164924.17	YWHAZ	8	cell organization and biogenesis;metabolic process;regulation of biological process;response to stimulus;transport	cytoplasm;cytosol;membrane;mitochondrion;nucleus	catalytic activity;protein binding;RNA binding	Pf00244	1.37	1.094	0.45	0.13	1.70893e+07	2.34091e+07	9.99584e+06	10938261	2	3	1	1	0.624	0	7.41	3
FALSE	High	IsMasterProtein	Q9Y448	Small kinetochore-associated protein OS=Homo sapiens GN=KNSTRN PE=1 SV=2	FALSE	0	10.366	11.3924	2	5	2	1	316	35.4	6.3	High	Not Found	High	Peak Found		90417	ENSG00000128944.13	C15orf23; KNSTRN	15	cell division;cell organization and biogenesis;regulation of biological process	chromosome;cytoplasm;cytoskeleton;cytosol;nucleus	protein binding		0.01	0.016	-6.64	-5.96	9.3588e+06		10123361	162073	2		1	1	0.334	0	2.71	2
FALSE	High	IsMasterProtein	Q12792-3	Isoform 3 of Twinfilin-1 OS=Homo sapiens GN=TWF1	FALSE	0	10.327	5.32213	1	3	1	1	357	41	6.73	High	High	Peak Found	High		5756	ENSG00000151239.13	TWF1	12	cell organization and biogenesis;regulation of biological process	cytoskeleton;cytosol	catalytic activity;nucleotide binding;protein binding	Pf00241	1.414	1.198	0.5	0.26	8.95734e+06	1.26694e+07	3.88951e+06	4.66025e+06	1	1	1	1	0.222	0	4.6	1
FALSE	High	IsMasterProtein	P56192	Methionine--tRNA ligase, cytoplasmic OS=Homo sapiens GN=MARS PE=1 SV=2	FALSE	0	10.113	6.77778	4	4	4	1	900	101.1	6.16	High	Peak Found	High	Peak Found	Dimethyl [K204; K456]	4141	ENSG00000166986.14	MARS	12	metabolic process	cytoplasm;cytosol;membrane	catalytic activity;nucleotide binding;protein binding;RNA binding	Pf00043, Pf00133, Pf00458, Pf09334, Pf10978, Pf13409, Pf13410, Pf14497	0.074		-3.76		5.61769e+06	413904			2	1			0.222	0	3.99	4
FALSE	High	IsMasterProtein	O15145	Actin-related protein 2/3 complex subunit 3 OS=Homo sapiens GN=ARPC3 PE=1 SV=3	FALSE	0	9.978	13.4831	2	3	2	1	178	20.5	8.59	High	High	Not Found	Not Found	Dimethyl [K50]	10094	ENSG00000111229.15	ARPC3	12	cell organization and biogenesis;cellular component movement;regulation of biological process;response to stimulus	cytoplasm;cytoskeleton;cytosol;membrane	protein binding;structural molecule activity	Pf04062	1.026		0.04		1.57904e+07	1.62062e+07			2	2			0.778	0	5.25	2
FALSE	High	IsMasterProtein	O75494	Serine/arginine-rich splicing factor 10 OS=Homo sapiens GN=SRSF10 PE=1 SV=1	FALSE	0	9.922	10.3053	2	5	2	1	262	31.3	11.27	High	High	High	High		10772	ENSG00000188529.14	SRSF10; LOC100996657	1	cell organization and biogenesis;metabolic process;regulation of biological process;transport	cytoplasm;cytosol;nucleus	nucleotide binding;protein binding;RNA binding	Pf00076, Pf13893, Pf14259	0.925	0.918	-0.11	-0.12	6.55078e+06	6.05621e+06	1.92145e+06	1.76296e+06	2	2	1	1	0.638	0	6.67	2
FALSE	High	IsMasterProtein	P62136-2	Isoform 2 of Serine/threonine-protein phosphatase PP1-alpha catalytic subunit OS=Homo sapiens GN=PPP1CA	FALSE	0	9.434	9.09091	2	3	2	1	341	38.6	6.62	Peak Found	High	High	Peak Found	Dimethyl [K271]	5499	ENSG00000172531.14	PPP1CA	11	cell division;metabolic process;regulation of biological process;response to stimulus	cytoplasm;cytosol;membrane;nucleus	catalytic activity;metal ion binding;protein binding	Pf00149	2.985	0.827	1.58	-0.27	4.19864e+06	1.2533e+07	3.37282e+06	2.79041e+06	2	2	1	1	0.389	0	6.2	2
FALSE	High	IsMasterProtein	P28288	ATP-binding cassette sub-family D member 3 OS=Homo sapiens GN=ABCD3 PE=1 SV=1	FALSE	0	9.42	9.1047	4	7	4	1	659	75.4	9.36	High	Peak Found	High	Peak Found	Dimethyl [K576]	5825	ENSG00000117528.11	ABCD3	1	cell organization and biogenesis;metabolic process;response to stimulus;transport	cytosol;membrane;mitochondrion;organelle lumen	catalytic activity;nucleotide binding;protein binding;transporter activity	Pf00005, Pf06472	0.06	0.027	-4.06	-5.2	7.71323e+06	463496	3.23871e+06	88143.9	3	2	3	1	0.233	0	0	4
FALSE	High	IsMasterProtein	P82094-2	Isoform 2 of TATA element modulatory factor OS=Homo sapiens GN=TMF1	FALSE	0	9.419	5.38321	5	5	5	1	1096	123.1	4.92	High	Not Found	High	Not Found	Dimethyl [K473; K668; K696; K705]	7110		TMF1	3	cell differentiation;cell organization and biogenesis;cellular component movement;defense response;metabolic process;regulation of biological process;response to stimulus;transport	cytosol;endoplasmic reticulum;Golgi;membrane;nucleus	DNA binding;protein binding	Pf12325, Pf12329	0.01	0.01	-6.64	-6.64	1.06969e+06		1.03118e+07		1		3		0.168	0	1.72	5
FALSE	High	IsMasterProtein	Q9UM54-6	Isoform 6 of Unconventional myosin-VI OS=Homo sapiens GN=MYO6	FALSE	0	9.357	4.12451	4	4	4	1	1285	148.6	8.56	Peak Found	High	Not Found	Not Found						transport	membrane	catalytic activity;motor activity;nucleotide binding	Pf00063, Pf00529	17.644		4.14		495617	8744899			2	3			0.117	0	4.37	4
FALSE	High	IsMasterProtein	Q9BZK7	F-box-like/WD repeat-containing protein TBL1XR1 OS=Homo sapiens GN=TBL1XR1 PE=1 SV=1	FALSE	0	9.337	7.97665	2	2	2	1	514	55.6	5.55	Not Found	Not Found	High	Not Found	Dimethyl [K125]	79718	ENSG00000177565.16	TBL1XR1	3	cell differentiation;cell organization and biogenesis;metabolic process;regulation of biological process;response to stimulus	nucleus	DNA binding;protein binding	Pf00400, Pf08513, Pf08662		0.01		-6.64			994388				1		0.089	0	3.45	2
FALSE	High	IsMasterProtein	Q13151	Heterogeneous nuclear ribonucleoprotein A0 OS=Homo sapiens GN=HNRNPA0 PE=1 SV=1	FALSE	0	9.279	16.7213	3	6	3	1	305	30.8	9.29	High	High	High	Peak Found	Dimethyl [K126]	10949	ENSG00000177733.6	HNRNPA0	5	defense response;metabolic process;regulation of biological process;response to stimulus	nucleus	nucleotide binding;protein binding;RNA binding	Pf00076, Pf13893, Pf14259	0.431	0.588	-1.21	-0.77	9.43418e+07	4.06949e+07	8.74187e+06	5.14041e+06	3	3	2	2	0.848	0	0	3
FALSE	High	IsMasterProtein	P84103	Serine/arginine-rich splicing factor 3 OS=Homo sapiens GN=SRSF3 PE=1 SV=1	FALSE	0	9.195	34.7561	4	5	4	1	164	19.3	11.65	High	Peak Found	Peak Found	High		6428	ENSG00000112081.16	SRSF3	6	metabolic process;regulation of biological process;transport	cytoplasm;nucleus	nucleotide binding;protein binding;RNA binding	Pf00076, Pf13893, Pf14259	0.881	2.485	-0.18	1.31	1.60722e+07	1.41561e+07	2.85437e+07	7.09194e+07	1	1	3	4	2.162	0	0	4
FALSE	High	IsMasterProtein	Q07021	Complement component 1 Q subcomponent-binding protein, mitochondrial OS=Homo sapiens GN=C1QBP PE=1 SV=1	FALSE	0	9.171	12.0567	2	2	2	1	282	31.3	4.84	High	Not Found	Not Found	Not Found	Dimethyl [K91; K174]	708	ENSG00000108561.8	C1QBP	17	cell death;cell organization and biogenesis;defense response;metabolic process;regulation of biological process;response to stimulus	cell surface;cytoplasm;cytosol;extracellular;membrane;mitochondrion;nucleus;organelle lumen	protein binding;RNA binding	Pf02330	0.01		-6.64		2.42725e+06				1				0.359	0	2.58	2
FALSE	High	IsMasterProtein	P08621	U1 small nuclear ribonucleoprotein 70 kDa OS=Homo sapiens GN=SNRNP70 PE=1 SV=2	FALSE	0	9.035	10.984	4	7	4	1	437	51.5	9.94	High	Peak Found	High	High	Dimethyl [K103; K130]	6625	ENSG00000104852.14	SNRNP70	19	metabolic process;regulation of biological process;response to stimulus	cytoplasm;nucleus;spliceosomal complex	nucleotide binding;protein binding;RNA binding	Pf00076, Pf12220, Pf13893, Pf14259	1.153	1.647	0.21	0.72	5.11243e+06	5.89687e+06	1.36026e+07	2.24044e+07	1	1	3	4	0.995	0	0	4
FALSE	High	IsMasterProtein	O00425	Insulin-like growth factor 2 mRNA-binding protein 3 OS=Homo sapiens GN=IGF2BP3 PE=1 SV=2	FALSE	0	8.994	7.59931	3	6	2	1	579	63.7	8.87	High	High	High	Not Found	Dimethyl [K465]	10643	ENSG00000136231.13	IGF2BP3	7	metabolic process;regulation of biological process;transport	cytoplasm;cytosol;membrane;nucleus	nucleotide binding;protein binding;RNA binding;translation regulator activity	Pf00013, Pf00076, Pf13014, Pf13893, Pf14259, Pf14611	0.262		-1.93		5.23369e+06	1.37185e+06			1	1			0.301	0	2.01	3
FALSE	High	IsMasterProtein	P63010-2	Isoform 2 of AP-2 complex subunit beta OS=Homo sapiens GN=AP2B1	FALSE	0	8.978	4.2061	3	4	3	1	951	105.6	5.34	High	High	Not Found	Not Found	Dimethyl [K261; K856; K950]	163	ENSG00000006125.17	AP2B1	17	cell organization and biogenesis;cellular component movement;regulation of biological process;response to stimulus;transport	cytoplasm;cytosol;membrane	protein binding;transporter activity	Pf01602, Pf02883, Pf09066, Pf12717, Pf13646	0.939		-0.09		8.87768e+06	8.34007e+06			3	3			0.202	0	1.78	3
FALSE	High	IsMasterProtein	P42677	40S ribosomal protein S27 OS=Homo sapiens GN=RPS27 PE=1 SV=3	FALSE	0	8.888	30.9524	3	5	2	1	84	9.5	9.45	Peak Found	High	High	High	Dimethyl [K16; K36]	6232	ENSG00000177954.11	RPS27	1	cell organization and biogenesis;cell proliferation;metabolic process;transport	cytosol;nucleus;ribosome	DNA binding;metal ion binding;protein binding;RNA binding;structural molecule activity	Pf01667	0.153	0.251	-2.71	-1.99	6.45829e+07	9.88922e+06	2.62122e+07	6.59152e+06	2	2	2	2	5.31	1	0	3
FALSE	High	IsMasterProtein	Q07666	KH domain-containing, RNA-binding, signal transduction-associated protein 1 OS=Homo sapiens GN=KHDRBS1 PE=1 SV=1	FALSE	0	8.887	4.51467	1	3	1	1	443	48.2	8.66	High	High	High	Peak Found	Dimethyl [K131]	10657	ENSG00000121774.17	KHDRBS1	1	cell proliferation;metabolic process;regulation of biological process;response to stimulus	cytoplasm;cytosol;membrane;nucleus	DNA binding;protein binding;RNA binding	Pf00013, Pf13014	0.302	0.221	-1.73	-2.18	8.21993e+06	2.48489e+06	1.59965e+06	353243	1	1	1	1	0.212	0	3.17	1
FALSE	High	IsMasterProtein	P37108	Signal recognition particle 14 kDa protein OS=Homo sapiens GN=SRP14 PE=1 SV=2	FALSE	0	8.807	28.6765	2	6	2	1	136	14.6	10.04	High	High	High	High	Dimethyl [K31]	6727	ENSG00000140319.10	SRP14	15	cell organization and biogenesis;response to stimulus;transport	cytoplasm;cytosol;extracellular;nucleus;organelle lumen	protein binding;RNA binding	Pf02290	0.623	1.469	-0.68	0.56	3.43634e+07	2.13997e+07	8228196	1.20911e+07	2	2	1	1	1.371	0	6.9	2
FALSE	High	IsMasterProtein	Q00325-2	Isoform B of Phosphate carrier protein, mitochondrial OS=Homo sapiens GN=SLC25A3	FALSE	0	8.804	13.8504	3	5	3	1	361	39.9	9.36	High	Peak Found	High	Peak Found	Dimethyl [K89; K111]	5250	ENSG00000075415.12	SLC25A3	12	transport	membrane;mitochondrion	protein binding;transporter activity	Pf00153	0.098	0.096	-3.35	-3.37	9.19526e+06	902937	2.7972e+07	2.69753e+06	2	1	3	1	0.389	0	5.44	3
FALSE	High	IsMasterProtein	O75531	Barrier-to-autointegration factor OS=Homo sapiens GN=BANF1 PE=1 SV=1	FALSE	0	8.695	48.3146	3	5	3	1	89	10.1	6.09	High	High	Not Found	High	Dimethyl [K53]	8815	ENSG00000175334.7	BANF1	11	cell organization and biogenesis;metabolic process;response to stimulus;transport	chromosome;cytoplasm;cytosol;nucleus	DNA binding;protein binding	Pf02961	11.86	100	3.57	6.64	1.74951e+06	20748767		679381	1	2		1	2.728	0	2.8	3
FALSE	High	IsMasterProtein	P04196	Histidine-rich glycoprotein OS=Homo sapiens GN=HRG PE=1 SV=1	FALSE	0	8.665	3.2381	3	7	3	1	525	59.5	7.5	High	High	High	High		3273	ENSG00000113905.4	HRG	3	coagulation;defense response;regulation of biological process;response to stimulus;transport	endosome;extracellular;membrane;organelle lumen;vacuole	enzyme regulator activity;metal ion binding;protein binding		1.977	2.459	0.98	1.3	4.58386e+07	9.06265e+07	2.47891e+07	6.09464e+07	3	3	2	2	0.445	0	8.48	3
FALSE	High	IsMasterProtein	Q08J23	tRNA (cytosine(34)-C(5))-methyltransferase OS=Homo sapiens GN=NSUN2 PE=1 SV=2	FALSE	0	8.662	9.77836	4	4	4	1	767	86.4	6.77	High	Peak Found	High	Peak Found	Dimethyl [K338; K356; K535]	54888	ENSG00000037474.14	NSUN2	5	cell division;cell organization and biogenesis;metabolic process	cytoplasm;cytoskeleton;nucleus	catalytic activity;RNA binding	Pf01189, Pf13659	0.423	0.336	-1.24	-1.57	2.49076e+06	1.05336e+06	3.09513e+06	1.03979e+06	2	2	1	1	0.212	0	0	4
FALSE	High	IsMasterProtein	P02787	Serotransferrin OS=Homo sapiens GN=TF PE=1 SV=3	FALSE	0	8.643	4.29799	2	4	2	1	698	77	7.12	High	High	High	High		7018	ENSG00000091513.14	TF	3	cell organization and biogenesis;cellular homeostasis;regulation of biological process;response to stimulus;transport	cell surface;endosome;extracellular;membrane;organelle lumen	metal ion binding;protein binding;transporter activity	Pf00405, Pf12974	1.888	1.489	0.92	0.57	6.03283e+06	1.13919e+07	4.22455e+06	6.28872e+06	2	2	1	1	0.166	0	5.26	2
FALSE	High	IsMasterProtein	Q9HAV0	Guanine nucleotide-binding protein subunit beta-4 OS=Homo sapiens GN=GNB4 PE=1 SV=3	FALSE	0	8.543	18.8235	4	4	2	1	340	37.5	6	High	Peak Found	Not Found	Not Found	Dimethyl [K89; K301]	59345	ENSG00000114450.9	GNB4	3	metabolic process;regulation of biological process;response to stimulus	cytosol;membrane	protein binding;signal transducer activity	Pf00400	0.285		-1.81		2.55325e+06	727889			1	1			0.778	0	1.73	4
FALSE	High	IsMasterProtein	P41252	Isoleucine--tRNA ligase, cytoplasmic OS=Homo sapiens GN=IARS PE=1 SV=2	FALSE	0	8.407	5.15055	4	6	4	1	1262	144.4	6.15	High	Peak Found	High	Peak Found	Dimethyl [K65; K98]	3376	ENSG00000196305.17	IARS	9	cell differentiation;metabolic process;regulation of biological process	cytoplasm;cytosol;membrane	catalytic activity;nucleotide binding;protein binding;RNA binding	Pf00133, Pf01406, Pf08264, Pf09334	0.076	0.116	-3.72	-3.1	3.92593e+06	298134	1.17284e+07	1.36528e+06	2	1	3	2	0.145	0	1.6	4
FALSE	High	IsMasterProtein	P06493	Cyclin-dependent kinase 1 OS=Homo sapiens GN=CDK1 PE=1 SV=3	FALSE	0	8.37	16.1616	3	5	3	1	297	34.1	8.4	High	Peak Found	High	Peak Found	Dimethyl [K238; K266; K295]	983	ENSG00000170312.15	CDK1	10	cell death;cell differentiation;cell division;cell organization and biogenesis;cell proliferation;cellular component movement;metabolic process;regulation of biological process;response to stimulus	cytoplasm;cytoskeleton;cytosol;membrane;mitochondrion;nucleus	catalytic activity;nucleotide binding;protein binding	Pf00069, Pf01636, Pf07714, Pf14531	0.216	0.432	-2.21	-1.21	13622902	2.94781e+06	9.19842e+06	3.97037e+06	3	2	2	1	0.389	0	0	3
FALSE	High	IsMasterProtein	Q96SN8	CDK5 regulatory subunit-associated protein 2 OS=Homo sapiens GN=CDK5RAP2 PE=1 SV=5	FALSE	0	8.347	2.79979	4	5	4	1	1893	214.9	5.58	High	Not Found	High	Not Found	Dimethyl [K1739; K1865]	55755	ENSG00000136861.17	CDK5RAP2	9	cell differentiation;cell organization and biogenesis;metabolic process;regulation of biological process	cytoplasm;cytoskeleton;cytosol;Golgi	DNA binding;protein binding	Pf02463, Pf03962, Pf04111, Pf05557, Pf06160, Pf07989, Pf10174, Pf12128, Pf13166, Pf13514, Pf13949, Pf14817	0.01	0.01	-6.64	-6.64	2.18731e+06		1.41865e+06		3		2		0.08	0	0	4
FALSE	High	IsMasterProtein	P31942	Heterogeneous nuclear ribonucleoprotein H3 OS=Homo sapiens GN=HNRNPH3 PE=1 SV=2	FALSE	0	8.312	7.22543	2	4	1	1	346	36.9	6.87	Peak Found	High	High	High	Dimethyl [K29]	3189	ENSG00000096746.17	HNRNPH3	10	cell differentiation;metabolic process	nucleus;spliceosomal complex	nucleotide binding;protein binding;RNA binding	Pf00076, Pf14259	2.141	0.806	1.1	-0.31	971029	2.07907e+06	871765	702818	1	1	1	1	0.389	0	2.83	2
FALSE	High	IsMasterProtein	Q16637	Survival motor neuron protein OS=Homo sapiens GN=SMN1 PE=1 SV=1	FALSE	0	8.301	6.12245	1	3	1	1	294	31.8	6.55	Peak Found	High	Peak Found	High		6606; 6607	ENSG00000205571.13; ENSG00000273772.4; ENSG00000277773.4; ENSG00000172062.16; ENSG00000275349.4	SMN1; SMN2	5; CHR_HSCHR5_1_CTG1_1; CHR_HSCHR5_2_CTG1_1	cell organization and biogenesis;cellular component movement;metabolic process;response to stimulus;transport	cytoplasm;cytosol;nucleus	protein binding;RNA binding;transporter activity	Pf06003	3.207	3.687	1.68	1.88	1.92133e+06	6.16246e+06	3.22968e+06	1.1907e+07	1	1	1	1	0.468	0	7.52	1
FALSE	High	IsMasterProtein	O15511	Actin-related protein 2/3 complex subunit 5 OS=Homo sapiens GN=ARPC5 PE=1 SV=3	FALSE	0	8.289	16.5563	2	5	2	1	151	16.3	5.67	High	High	High	High	Dimethyl [K60]	10092	ENSG00000162704.15	ARPC5	1	cell organization and biogenesis;cellular component movement;regulation of biological process;response to stimulus;transport	cytoplasm;cytoskeleton;cytosol;endosome;extracellular;organelle lumen	protein binding;structural molecule activity	Pf04699	1.681	1.821	0.75	0.86	1.53725e+07	2.58401e+07	3.07836e+06	5.60492e+06	2	2	1	1	0.778	0	4.03	2
FALSE	High	IsMasterProtein	Q69YQ0	Cytospin-A OS=Homo sapiens GN=SPECC1L PE=1 SV=2	FALSE	0	8.273	3.8496	3	3	3	1	1117	124.5	5.72	Peak Found	High	Not Found	Not Found		23384		SPECC1L	22	cell division;cell organization and biogenesis;cellular component movement;metabolic process;regulation of biological process	cytoplasm;cytoskeleton;cytosol	protein binding;structural molecule activity	Pf00038, Pf00307, Pf01920, Pf02463, Pf03251, Pf04111, Pf04156, Pf05667, Pf05701, Pf08317, Pf11971, Pf12128, Pf13166	9.467		3.24		2.04804e+06	19388849			3	3			0.102	0	2.45	3
FALSE	High	IsMasterProtein	P08195-4	Isoform 4 of 4F2 cell-surface antigen heavy chain OS=Homo sapiens GN=SLC3A2	FALSE	0	8.197	4.68986	4	5	4	1	661	71.1	4.97	High	Peak Found	High	Peak Found	Dimethyl [K286]					metabolic process		catalytic activity	Pf00128	0.182	0.135	-2.46	-2.89	1.37971e+07	2.50782e+06	1.82915e+07	2.47514e+06	2	2	3	3	0.322	0	6.61	4
FALSE	High	IsMasterProtein	P27635	60S ribosomal protein L10 OS=Homo sapiens GN=RPL10 PE=1 SV=4	FALSE	0	8.111	17.2897	3	4	3	1	214	24.6	10.08	High	Peak Found	High	High	Dimethyl [K121]	6134		RPL10	X	cell organization and biogenesis;metabolic process;transport	cytosol;endoplasmic reticulum;membrane;ribosome	protein binding;RNA binding;structural molecule activity	Pf00252	0.558	0.499	-0.84	-1	2.11453e+07	1.17945e+07	2.80636e+07	1.39902e+07	2	2	2	2	0.701	0	2.82	3
FALSE	High	IsMasterProtein	Q9UMS4	Pre-mRNA-processing factor 19 OS=Homo sapiens GN=PRPF19 PE=1 SV=1	FALSE	0	8.088	6.15079	2	3	2	1	504	55.1	6.61	Peak Found	High	High	High		27339	ENSG00000110107.8	PRPF19	11	cell organization and biogenesis;cell proliferation;metabolic process;regulation of biological process;response to stimulus	cytoplasm;cytoskeleton;membrane;nucleus;spliceosomal complex	catalytic activity;metal ion binding;protein binding	Pf00400, Pf04564, Pf08606, Pf11789		0.658		-0.6			7.44411e+06	4.89513e+06			2	2	0.35	0	0	2
FALSE	High	IsMasterProtein	P40429	60S ribosomal protein L13a OS=Homo sapiens GN=RPL13A PE=1 SV=2	FALSE	0	8.069	15.2709	3	6	3	1	203	23.6	10.93	High	High	High	High	Dimethyl [K159]	23521	ENSG00000142541.16	RPL13A	19	cell organization and biogenesis;metabolic process;regulation of biological process;response to stimulus;transport	cytoplasm;cytosol;membrane;nucleus;ribosome	RNA binding;structural molecule activity	Pf00572	0.638	0.906	-0.65	-0.14	1.05277e+07	6.71898e+06	3.18257e+07	2.88239e+07	2	2	3	3	0.719	0	1.95	3
FALSE	High	IsMasterProtein	Q9UBS4	DnaJ homolog subfamily B member 11 OS=Homo sapiens GN=DNAJB11 PE=1 SV=1	FALSE	0	7.921	11.1732	3	4	3	1	358	40.5	6.18	High	Not Found	High	Not Found	Dimethyl [K82]	51726	ENSG00000090520.11	DNAJB11	3	metabolic process;regulation of biological process	cytoplasm;endoplasmic reticulum;membrane;nucleus;organelle lumen	protein binding	Pf00226, Pf01556	0.01	0.01	-6.64	-6.64	6.28733e+06		978453		2		1		0.369	0	0	3
FALSE	High	IsMasterProtein	Q99714	3-hydroxyacyl-CoA dehydrogenase type-2 OS=Homo sapiens GN=HSD17B10 PE=1 SV=3	FALSE	0	7.748	26.4368	3	4	3	1	261	26.9	7.78	High	Peak Found	High	Not Found	Dimethyl [K52; K212]	3028	ENSG00000072506.12	HSD17B10	X	cell organization and biogenesis;metabolic process	cytoplasm;membrane;mitochondrion;organelle lumen	catalytic activity;protein binding;RNA binding	Pf00106, Pf08659, Pf13561	0.163	0.01	-2.61	-6.64	440092	71877.8	189399		1	1	1		0.54	0	2.2	3
FALSE	High	IsMasterProtein	P68871	Hemoglobin subunit beta OS=Homo sapiens GN=HBB PE=1 SV=2	FALSE	0	7.673	21.0884	3	4	3	1	147	16	7.28	High	Peak Found	High	Peak Found	Dimethyl [K18; K145]	3043	ENSG00000244734.3	HBB	11	cell organization and biogenesis;coagulation;metabolic process;regulation of biological process;response to stimulus;transport	cytosol;extracellular;organelle lumen	antioxidant activity;catalytic activity;metal ion binding;protein binding;transporter activity	Pf00042	0.055	0.056	-4.19	-4.17	10957644	599386	1.55451e+07	864270	1	1	2	2	0.874	0	2.59	3
FALSE	High	IsMasterProtein	P05386	60S acidic ribosomal protein P1 OS=Homo sapiens GN=RPLP1 PE=1 SV=1	FALSE	0	7.618	51.7544	2	4	2	1	114	11.5	4.32	High	High	Peak Found	High	Dimethyl [K49; K92]	6176	ENSG00000137818.11	RPLP1	15	cell organization and biogenesis;metabolic process;regulation of biological process;transport	cytosol;ribosome	enzyme regulator activity;protein binding;RNA binding;structural molecule activity	Pf00428	0.279	0.647	-1.84	-0.63	2.48521e+07	6.92452e+06	7.64747e+06	4.95028e+06	3	3	1	1	2.981	0	4.88	2
FALSE	High	IsMasterProtein	Q13838-2	Isoform 2 of Spliceosome RNA helicase DDX39B OS=Homo sapiens GN=DDX39B	FALSE	0	7.546	9.70655	4	4	4	1	443	50.6	5.88	High	High	High	Peak Found	Dimethyl [K413]	7919		DDX39B	6	cell organization and biogenesis;metabolic process;regulation of biological process;transport	cytoplasm;nucleus;spliceosomal complex	catalytic activity;nucleotide binding;protein binding;RNA binding	Pf00270, Pf00271, Pf14617	0.203	0.384	-2.3	-1.38	7.54841e+06	1.53184e+06	8.77251e+06	3.36564e+06	1	1	2	2	0.374	0	0	4
FALSE	High	IsMasterProtein	P38919	Eukaryotic initiation factor 4A-III OS=Homo sapiens GN=EIF4A3 PE=1 SV=4	FALSE	0	7.479	6.32603	2	4	1	1	411	46.8	6.73	Not Found	Not Found	Peak Found	High	Dimethyl [K60]	9775	ENSG00000141543.9	EIF4A3	17	metabolic process;regulation of biological process;response to stimulus;transport	cytoplasm;cytosol;membrane;nucleus;spliceosomal complex	catalytic activity;nucleotide binding;protein binding;RNA binding	Pf00270, Pf00271		0.684		-0.55			8.14402e+06	5.57121e+06			1	1	0.318	0	0	2
FALSE	High	IsMasterProtein	Q9BPX5	Actin-related protein 2/3 complex subunit 5-like protein OS=Homo sapiens GN=ARPC5L PE=1 SV=1	FALSE	0	7.384	16.3399	2	3	2	1	153	16.9	6.6	Peak Found	High	Peak Found	High		81873	ENSG00000136950.13	ARPC5L	9	cell organization and biogenesis;cellular component movement;regulation of biological process	cytoplasm;cytoskeleton	protein binding	Pf04699	1.951	2.348	0.96	1.23	1.69288e+07	3.30278e+07	2.86955e+06	6.73829e+06	2	2	1	1	0.468	0	5.79	2
FALSE	High	IsMasterProtein	P61513	60S ribosomal protein L37a OS=Homo sapiens GN=RPL37A PE=1 SV=2	FALSE	0	7.332	32.6087	2	4	2	1	92	10.3	10.43	Not Found	Not Found	High	High	Dimethyl [K62; K80]	6168	ENSG00000197756.9	RPL37A	2	cell organization and biogenesis;metabolic process;transport	cytosol;nucleus;ribosome	metal ion binding;protein binding;RNA binding;structural molecule activity	Pf01780		0.889		-0.17			1.17203e+07	1.04171e+07			2	1	3.642	0	0	2
FALSE	High	IsMasterProtein	P51571	Translocon-associated protein subunit delta OS=Homo sapiens GN=SSR4 PE=1 SV=1	FALSE	0	7.292	18.4971	2	3	2	1	173	19	6.15	High	Not Found	High	Not Found	Dimethyl [K73]	6748	ENSG00000180879.13	SSR4	X		endoplasmic reticulum;membrane		Pf05404	0.01	0.01	-6.64	-6.64	2.39148e+06		3312411		1		2		0.585	0	3.49	2
FALSE	High	IsMasterProtein	Q13555-6	Isoform 6 of Calcium/calmodulin-dependent protein kinase type II subunit gamma OS=Homo sapiens GN=CAMK2G	FALSE	0	7.187	8.5034	3	3	3	1	588	65.2	7.94	High	Peak Found	High	Peak Found	Dimethyl [K138; K147; K246; K481]	818		CAMK2G	10	cell differentiation;cell organization and biogenesis;metabolic process;regulation of biological process;response to stimulus;transport	cytoplasm;cytosol;membrane	catalytic activity;nucleotide binding;protein binding	Pf00069, Pf07714, Pf08332, Pf12680, Pf13474, Pf14534	0.306	0.212	-1.71	-2.24	7.23672e+06	2.21125e+06	1.50205e+06	318475	2	2	1	1	0.233	0	2.17	3
FALSE	High	IsMasterProtein	P04843	Dolichyl-diphosphooligosaccharide--protein glycosyltransferase subunit 1 OS=Homo sapiens GN=RPN1 PE=1 SV=1	FALSE	0	7.165	5.27183	2	2	2	1	607	68.5	6.38	High	Peak Found	Not Found	Not Found		6184	ENSG00000163902.11	RPN1	3	metabolic process	cytosol;endoplasmic reticulum;membrane	catalytic activity;protein binding;RNA binding	Pf04597	0.344		-1.54		2.17476e+06	748623			2	1			0.119	0	2.91	2
FALSE	High	IsMasterProtein	P06396	Gelsolin OS=Homo sapiens GN=GSN PE=1 SV=1	FALSE	0	7.13	6.64962	3	3	3	1	782	85.6	6.28	High	High	Not Found	Not Found	Dimethyl [K390; K597]	2934	ENSG00000148180.19	GSN	9	cell death;cell organization and biogenesis;metabolic process;regulation of biological process;response to stimulus;transport	cytoplasm;cytoskeleton;cytosol;extracellular;membrane;nucleus;organelle lumen	metal ion binding;protein binding	Pf00626	4.458		2.16		845375	3.76876e+06			1	1			0.184	0	0	3
FALSE	High	IsMasterProtein	P62826	GTP-binding nuclear protein Ran OS=Homo sapiens GN=RAN PE=1 SV=3	FALSE	0	7.065	9.72222	2	4	2	1	216	24.4	7.49	Not Found	High	High	High	Dimethyl [K23]	5901	ENSG00000132341.11	RAN	12	cell division;cell organization and biogenesis;metabolic process;regulation of biological process;response to stimulus;transport	chromosome;cytoplasm;cytosol;endosome;membrane;nucleus	catalytic activity;nucleotide binding;protein binding;RNA binding;transporter activity	Pf00025, Pf00071, Pf08477	100	1.918	6.64	0.94		5019365	3.75027e+06	7.19407e+06		1	1	1	0.874	0	1.82	2
FALSE	High	IsMasterProtein	Q9HD23-4	Isoform 4 of Magnesium transporter MRS2 homolog, mitochondrial OS=Homo sapiens GN=MRS2	FALSE	0	6.991	13.4529	3	3	3	1	446	50.6	6.89	High	Not Found	High	Not Found	Dimethyl [K90; K275]	57380	ENSG00000124532.14	MRS2	6	transport	membrane;mitochondrion	transporter activity		0.01	0.01	-6.64	-6.64	1.42316e+06		1.34071e+06		2		1		0.269	0	0	3
FALSE	High	IsMasterProtein	P13995	Bifunctional methylenetetrahydrofolate dehydrogenase/cyclohydrolase, mitochondrial OS=Homo sapiens GN=MTHFD2 PE=1 SV=2	FALSE	0	6.989	15.1429	3	4	3	1	350	37.9	8.73	High	Peak Found	High	Peak Found	Dimethyl [K185; K322]	10797	ENSG00000065911.11	MTHFD2	2	metabolic process	cytosol;mitochondrion;organelle lumen	catalytic activity;metal ion binding	Pf00763, Pf02882	0.324	0.179	-1.63	-2.49	7.77067e+06	2.51826e+06	4.84711e+06	865443	3	2	1	1	0.369	0	0	3
FALSE	High	IsMasterProtein	P43307	Translocon-associated protein subunit alpha OS=Homo sapiens GN=SSR1 PE=1 SV=3	FALSE	0	6.979	8.04196	2	4	2	1	286	32.2	4.49	High	Not Found	High	Not Found	Dimethyl [K110]	6745	ENSG00000124783.12	SSR1	6	cell organization and biogenesis;regulation of biological process;transport	endoplasmic reticulum;membrane	protein binding	Pf03896	0.01	0.01	-6.64	-6.64	6.7271e+06		671903		2		1		0.778	0	0	2
FALSE	High	IsMasterProtein	P46783	40S ribosomal protein S10 OS=Homo sapiens GN=RPS10 PE=1 SV=1	FALSE	0	6.978	23.6364	3	4	3	1	165	18.9	10.15	High	Peak Found	High	Peak Found	Dimethyl [K17]	6204	ENSG00000124614.13	RPS10	6	cell organization and biogenesis;metabolic process;transport	cytoplasm;cytosol;membrane;nucleus;ribosome	protein binding;RNA binding;structural molecule activity	Pf03501	0.206	0.267	-2.28	-1.91	1.12498e+07	2.3197e+06	1.18316e+07	3.15448e+06	1	1	3	2	0.701	0	0	3
FALSE	High	IsMasterProtein	P48729	Casein kinase I isoform alpha OS=Homo sapiens GN=CSNK1A1 PE=1 SV=2	FALSE	0	6.906	10.3858	3	4	3	1	337	38.9	9.57	Peak Found	High	Peak Found	High		1452	ENSG00000113712.17	CSNK1A1	5	cell division;cell organization and biogenesis;metabolic process;regulation of biological process;response to stimulus;transport	chromosome;cytoplasm;cytoskeleton;cytosol;membrane;nucleus	catalytic activity;nucleotide binding;protein binding	Pf00069, Pf07714	3.396	42.291	1.76	5.4	1.15227e+06	3.91309e+06	353341	14942994	1	1	1	3	0.389	0	2.01	3
FALSE	High	IsMasterProtein	Q15645	Pachytene checkpoint protein 2 homolog OS=Homo sapiens GN=TRIP13 PE=1 SV=2	FALSE	0	6.773	12.037	4	4	4	1	432	48.5	6.09	High	Peak Found	High	Not Found	Dimethyl [K340; K368]	9319	ENSG00000071539.13	TRIP13	5	cell differentiation;cell organization and biogenesis;metabolic process;regulation of biological process;response to stimulus	nucleus	catalytic activity;nucleotide binding;protein binding;RNA binding	Pf00004, Pf00910, Pf02367, Pf05496, Pf06068, Pf07726, Pf07728, Pf13191, Pf13207, Pf13238, Pf13401, Pf13521, Pf13671	0.087	0.01	-3.52	-6.64	4.53171e+06	393753	867802		1	1	2		0.445	0	0	4
FALSE	High	IsMasterProtein	P02786	Transferrin receptor protein 1 OS=Homo sapiens GN=TFRC PE=1 SV=2	FALSE	0	6.763	5.39474	3	3	3	1	760	84.8	6.61	High	Peak Found	High	Not Found	Dimethyl [K161; K394; K693]	7037	ENSG00000072274.12	TFRC	3	cell differentiation;cell organization and biogenesis;cellular homeostasis;metabolic process;regulation of biological process;response to stimulus;transport	cell surface;endosome;extracellular;membrane	protein binding;receptor activity;RNA binding;transporter activity	Pf02225, Pf04253, Pf04389	0.201	0.01	-2.32	-6.64	8.2533e+06	1.65537e+06	1.42776e+06		2	1	1		0.145	0	2.03	3
FALSE	High	IsMasterProtein	P09874	Poly [ADP-ribose] polymerase 1 OS=Homo sapiens GN=PARP1 PE=1 SV=4	FALSE	0	6.723	3.5503	3	3	3	1	1014	113	8.88	Peak Found	High	Not Found	High		142	ENSG00000143799.12	PARP1	1	cell differentiation;cell organization and biogenesis;metabolic process;regulation of biological process;response to stimulus	membrane;mitochondrion;nucleus	catalytic activity;DNA binding;metal ion binding;nucleotide binding;protein binding;RNA binding	Pf00533, Pf00644, Pf00645, Pf02877, Pf05406, Pf08063	5.284	100	2.4	6.64	158882	839514		1.71843e+06	1	1		2	0.116	0	0	3
FALSE	High	IsMasterProtein	P14866	Heterogeneous nuclear ribonucleoprotein L OS=Homo sapiens GN=HNRNPL PE=1 SV=2	FALSE	0	6.658	4.58404	2	3	2	1	589	64.1	8.22	High	Not Found	High	Peak Found	Dimethyl [K552; K568]	3191	ENSG00000282947.1; ENSG00000104824.16	HNRNPL	19; CHR_HG26_PATCH	cell communication;metabolic process;regulation of biological process;response to stimulus	cytoplasm;cytosol;membrane;nucleus	DNA binding;nucleotide binding;protein binding;RNA binding	Pf00076, Pf13893, Pf14259	0.01	0.233	-6.64	-2.1	5236938		1.68854e+07	3.92605e+06	1		2	1	0.166	0	4.27	2
FALSE	High	IsMasterProtein	Q9NR30	Nucleolar RNA helicase 2 OS=Homo sapiens GN=DDX21 PE=1 SV=5	FALSE	0	6.644	4.21456	3	4	3	1	783	87.3	9.28	High	Peak Found	High	High	Dimethyl [K215; K247]	9188	ENSG00000165732.12	DDX21	10	cell differentiation;metabolic process;regulation of biological process;response to stimulus	membrane;nucleus	catalytic activity;nucleotide binding;protein binding;RNA binding	Pf00270, Pf00271, Pf08152, Pf14617	0.421	1.02	-1.25	0.03	1.10762e+06	466348	7.14733e+06	7.29089e+06	1	1	2	2	0.17	0	4.29	3
FALSE	High	IsMasterProtein	P40939	Trifunctional enzyme subunit alpha, mitochondrial OS=Homo sapiens GN=HADHA PE=1 SV=2	FALSE	0	6.557	5.63565	3	3	3	1	763	82.9	9.04	High	Peak Found	Not Found	Not Found	Dimethyl [K303]	3030	ENSG00000084754.10	HADHA	2	metabolic process;response to stimulus	membrane;mitochondrion	catalytic activity;nucleotide binding;protein binding	Pf00378, Pf00725, Pf02737	0.385		-1.38		2.14522e+06	826588			1	1			0.166	0	0	3
FALSE	High	IsMasterProtein	P18077	60S ribosomal protein L35a OS=Homo sapiens GN=RPL35A PE=1 SV=2	FALSE	0	6.534	14.5455	2	5	2	1	110	12.5	11.06	High	High	High	High	Dimethyl [K45]	6165	ENSG00000182899.14	RPL35A	3	cell organization and biogenesis;metabolic process;transport	cytosol;membrane;mitochondrion;ribosome	protein binding;RNA binding;structural molecule activity	Pf01247	0.59	0.732	-0.76	-0.45	1.64247e+07	9.69311e+06	1.89264e+07	1.38513e+07	1	1	2	2	1.154	0	3.94	2
FALSE	High	IsMasterProtein	Q9Y285	Phenylalanine--tRNA ligase alpha subunit OS=Homo sapiens GN=FARSA PE=1 SV=3	FALSE	0	6.527	7.48031	2	3	2	1	508	57.5	7.8	High	Not Found	High	Peak Found		2193	ENSG00000179115.10	FARSA	19	cell organization and biogenesis;metabolic process;regulation of biological process	cytoplasm;cytosol;membrane	catalytic activity;nucleotide binding;protein binding;RNA binding	Pf00152, Pf01409, Pf08279, Pf12802, Pf13463	0.01	0.079	-6.64	-3.67	583713		4.00054e+06	314395	1		1	1	0.172	0	2.41	2
FALSE	High	IsMasterProtein	Q3MHD2-2	Isoform 2 of Protein LSM12 homolog OS=Homo sapiens GN=LSM12	FALSE	0	6.494	17.1717	2	2	2	1	198	22	6.9	High	Peak Found	Not Found	Not Found	Dimethyl [K89; K155]								Pf09793	0.107		-3.23		2.61667e+07	2.79175e+06			2	2			0.52	0	1.78	2
FALSE	High	IsMasterProtein	Q12905	Interleukin enhancer-binding factor 2 OS=Homo sapiens GN=ILF2 PE=1 SV=2	FALSE	0	6.487	9.48718	2	3	2	1	390	43	5.26	High	Peak Found	Peak Found	High	Dimethyl [K45; K59; K80]	3608	ENSG00000143621.16	ILF2	1	metabolic process;regulation of biological process;response to stimulus;transport	cytoplasm;extracellular;membrane;nucleus;organelle lumen	catalytic activity;DNA binding;nucleotide binding;protein binding;RNA binding	Pf07528	0.589	0.91	-0.76	-0.14	1.21614e+07	7.1645e+06	2.66848e+06	2.42738e+06	2	2	1	1	0.389	0	0	2
FALSE	High	IsMasterProtein	P62195	26S protease regulatory subunit 8 OS=Homo sapiens GN=PSMC5 PE=1 SV=1	FALSE	0	6.462	6.89655	2	3	1	1	406	45.6	7.55	Not Found	Not Found	High	Not Found	Dimethyl [K196; K287]	5705	ENSG00000087191.12	PSMC5	17	metabolic process;regulation of biological process;response to stimulus;transport	cytoplasm;cytosol;membrane;nucleus;proteasome	catalytic activity;nucleotide binding;protein binding;RNA binding	Pf00004, Pf00910, Pf01057, Pf01078, Pf05496, Pf06068, Pf06414, Pf07724, Pf07726, Pf07728, Pf13191, Pf13207, Pf13401		0.01		-6.64			239406				1		0.28	0	3.41	2
FALSE	High	IsMasterProtein	P62244	40S ribosomal protein S15a OS=Homo sapiens GN=RPS15A PE=1 SV=2	FALSE	0	6.292	24.6154	3	5	3	1	130	14.8	10.13	High	Peak Found	High	Peak Found	Dimethyl [K12]	6210	ENSG00000134419.15	RPS15A	16	cell organization and biogenesis;metabolic process;regulation of biological process;response to stimulus;transport	cytoplasm;cytosol;membrane;mitochondrion;ribosome	protein binding;RNA binding;structural molecule activity	Pf00410	0.377	0.498	-1.41	-1.01	6.56327e+07	2.47616e+07	1.06936e+07	5.32051e+06	3	3	2	1	0.874	0	4.55	3
FALSE	High	IsMasterProtein	P60981	Destrin OS=Homo sapiens GN=DSTN PE=1 SV=3	FALSE	0	6.291	16.9697	2	3	2	1	165	18.5	7.85	High	High	High	Not Found	Dimethyl [K96; K112]	11034	ENSG00000125868.15	DSTN	20	cell organization and biogenesis;regulation of biological process	cytoplasm;cytoskeleton	protein binding	Pf00241	0.146	0.01	-2.78	-6.64	2.73052e+07	3.97989e+06	360407		2	1	1		0.425	0	2.49	2
FALSE	High	IsMasterProtein	P24666	Low molecular weight phosphotyrosine protein phosphatase OS=Homo sapiens GN=ACP1 PE=1 SV=3	FALSE	0	6.254	14.557	2	2	2	1	158	18	6.74	High	Not Found	High	Peak Found	Dimethyl [K124]	52	ENSG00000143727.15	ACP1	2	metabolic process	cytoplasm	catalytic activity;protein binding	Pf01451	0.01	0.085	-6.64	-3.56	1.93778e+06		8042860	683915	1		1	1	0.585	0	0	2
FALSE	High	IsMasterProtein	Q969G5	Protein kinase C delta-binding protein OS=Homo sapiens GN=PRKCDBP PE=1 SV=3	FALSE	0	6.134	9.96169	2	3	2	1	261	27.7	6.43	High	Not Found	High	Not Found	Dimethyl [K84]	112464	ENSG00000170955.9	PRKCDBP	11	cell organization and biogenesis;regulation of biological process	cytoplasm;membrane	protein binding	Pf15237		0.01		-6.64			5.25293e+06				2		0.359	0	2.07	2
FALSE	High	IsMasterProtein	Q13045	Protein flightless-1 homolog OS=Homo sapiens GN=FLII PE=1 SV=2	FALSE	0	6.052	3.7037	3	3	3	1	1269	144.7	6.05	Peak Found	High	Peak Found	High		2314	ENSG00000177731.15; ENSG00000284571.1	FLII	17; CHR_HSCHR17_3_CTG1	cell organization and biogenesis;development;metabolic process;regulation of biological process	cytoplasm;cytoskeleton;cytosol;nucleus	protein binding	Pf00626, Pf12799, Pf13855	4.107	0.424	2.04	-1.24	1.65191e+06	6.78396e+06	654270	277428	2	2	1	1	0.098	0	0	3
FALSE	High	IsMasterProtein	P35244	Replication protein A 14 kDa subunit OS=Homo sapiens GN=RPA3 PE=1 SV=1	FALSE	0	6.045	22.314	2	2	2	1	121	13.6	5.08	Peak Found	High	Not Found	Not Found		6119	ENSG00000106399.11	RPA3	7	cell organization and biogenesis;metabolic process;regulation of biological process;response to stimulus	nucleus	DNA binding;protein binding	Pf08661	8.298		3.05		569895	4.72873e+06			1	2			0.778	0	1.87	2
FALSE	High	IsMasterProtein	CON_P12763	SWISS-PROT P12763 (Bos taurus) Alpha-2-HS-glycoprotein precursor	TRUE	0	6.008	11.9777	3	3	3	1	359	38.4	5.5	High	Peak Found	High	Peak Found	Dimethyl [K131]									0.733	0.635	-0.45	-0.66	7.4422e+06	5.45318e+06	7.15732e+06	4.54464e+06	1	1	1	1	0.468	0	2.01	3
FALSE	High	IsMasterProtein	P36957	Dihydrolipoyllysine-residue succinyltransferase component of 2-oxoglutarate dehydrogenase complex, mitochondrial OS=Homo sapiens GN=DLST PE=1 SV=4	FALSE	0	5.959	5.51876	2	2	2	1	453	48.7	8.95	Peak Found	High	Not Found	Not Found		1743	ENSG00000119689.14	DLST	14	metabolic process	membrane;mitochondrion;nucleus;organelle lumen	catalytic activity	Pf00198, Pf00364	1.936		0.95		467477	905041			1	1			0.212	0	2.19	2
FALSE	High	IsMasterProtein	Q5JWF2	Guanine nucleotide-binding protein G(s) subunit alpha isoforms XLas OS=Homo sapiens GN=GNAS PE=1 SV=2	FALSE	0	5.871	1.06075	1	3	1	1	1037	111	5.03	High	High	High	Peak Found	Dimethyl [K696]	2778	ENSG00000087460.24	GNAS	20	metabolic process;regulation of biological process;response to stimulus	cytosol;membrane	catalytic activity;metal ion binding;nucleotide binding;protein binding;signal transducer activity	Pf00025, Pf00503, Pf08477	0.682	0.34	-0.55	-1.56	1.91906e+07	1.30956e+07	8.64377e+06	2.93738e+06	1	1	1	1	0.133	0	4.23	1
FALSE	High	IsMasterProtein	P45880-1	Isoform 1 of Voltage-dependent anion-selective channel protein 2 OS=Homo sapiens GN=VDAC2	FALSE	0	5.757	9.70874	3	3	3	1	309	33.4	7.59	High	Peak Found	High	Peak Found	Dimethyl [K54; K262; K292]	7417	ENSG00000165637.13	VDAC2	10	regulation of biological process;transport	membrane;mitochondrion;nucleus	nucleotide binding;protein binding;transporter activity	Pf01459	0.232	0.306	-2.11	-1.71	7.81427e+06	1809300	7.93005e+06	2.42953e+06	2	1	1	1	0.438	0	1.93	3
FALSE	High	IsMasterProtein	P22695	Cytochrome b-c1 complex subunit 2, mitochondrial OS=Homo sapiens GN=UQCRC2 PE=1 SV=3	FALSE	0	5.746	7.50552	2	3	2	1	453	48.4	8.63	High	Not Found	High	Not Found	Dimethyl [K375]	7385	ENSG00000140740.10; ENSG00000284493.1	UQCRC2	16; CHR_HG926_PATCH	metabolic process;transport	membrane;mitochondrion	catalytic activity;metal ion binding;protein binding	Pf00675, Pf05193	0.01	0.01	-6.64	-6.64	533788		652615		1		1		0.202	0	0	2
FALSE	High	IsMasterProtein	P98179	RNA-binding protein 3 OS=Homo sapiens GN=RBM3 PE=1 SV=1	FALSE	0	5.697	11.465	1	1	1	1	157	17.2	8.91	High	Peak Found	Not Found	Not Found		5935	ENSG00000102317.17	RBM3	X	metabolic process;regulation of biological process	cytoplasm;nucleus	nucleotide binding;protein binding;RNA binding	Pf00076, Pf13893, Pf14259	0.2		-2.32		26788743	5.34717e+06			1	1			0.259	0	3.31	1
FALSE	High	IsMasterProtein	P62995	Transformer-2 protein homolog beta OS=Homo sapiens GN=TRA2B PE=1 SV=1	FALSE	0	5.649	7.29167	1	1	1	1	288	33.6	11.25	Not Found	Not Found	Peak Found	High		6434	ENSG00000136527.17	TRA2B	3	metabolic process;regulation of biological process;response to stimulus	membrane;nucleus	nucleotide binding;protein binding;RNA binding	Pf00076, Pf08777, Pf13893, Pf14259		2.004		1			1.73313e+06	3.47332e+06			1	1	0.233	0	3.12	1
FALSE	High	IsMasterProtein	P62316	Small nuclear ribonucleoprotein Sm D2 OS=Homo sapiens GN=SNRPD2 PE=1 SV=1	FALSE	0	5.594	7.62712	1	3	1	1	118	13.5	9.91	High	High	Peak Found	High		6633	ENSG00000125743.10	SNRPD2	19	cell organization and biogenesis;metabolic process;transport	cytoplasm;cytosol;nucleus;spliceosomal complex	protein binding;RNA binding	Pf01423	0.66	0.863	-0.6	-0.21	1.07993e+07	7.13203e+06	4498425	3.88086e+06	1	1	1	1	0.668	0	6.22	1
FALSE	High	IsMasterProtein	Q07955-2	Isoform ASF-2 of Serine/arginine-rich splicing factor 1 OS=Homo sapiens GN=SRSF1	FALSE	0	5.583	6.84932	2	3	2	1	292	32	5.91	High	Not Found	High	High		6426		SRSF1	17	cell differentiation;cell organization and biogenesis;metabolic process;regulation of biological process;transport	cytoplasm;nucleus;spliceosomal complex	nucleotide binding;protein binding;RNA binding	Pf00076, Pf13893, Pf14259		2.82		1.5			4.45721e+06	1.25674e+07			2	2	0.311	0	2.03	2
FALSE	High	IsMasterProtein	P62861	40S ribosomal protein S30 OS=Homo sapiens GN=FAU PE=1 SV=1	FALSE	0	5.549	16.9492	1	3	1	1	59	6.6	12.15	High	High	Not Found	Not Found	Dimethyl [K51]	2197		FAU	11	cell organization and biogenesis;defense response;metabolic process;response to stimulus;transport	cytosol;ribosome	RNA binding;structural molecule activity	Pf04758	0.371		-1.43		73285880	27198234			1	1			3.642	0	4.44	1
FALSE	High	IsMasterProtein	P14923	Junction plakoglobin OS=Homo sapiens GN=JUP PE=1 SV=3	FALSE	0	5.51	2.41611	1	2	1	1	745	81.7	6.14	High	Peak Found	High	Not Found		3728	ENSG00000173801.16	JUP	17	cell death;cell organization and biogenesis;cellular component movement;regulation of biological process;response to stimulus;transport	cytoplasm;cytoskeleton;cytosol;extracellular;membrane;nucleus;organelle lumen	protein binding;signal transducer activity;structural molecule activity	Pf00514	0.146	0.01	-2.78	-6.64	7.06208e+06	1.02755e+06	2.18149e+06		1	1	1		0.054	0	5.1	1
FALSE	High	IsMasterProtein	Q8IZ83	Aldehyde dehydrogenase family 16 member A1 OS=Homo sapiens GN=ALDH16A1 PE=1 SV=2	FALSE	0	5.505	1.62095	1	2	1	1	802	85.1	6.79	High	Peak Found	High	Not Found		126133	ENSG00000161618.9	ALDH16A1	19	metabolic process	membrane	catalytic activity	Pf00171, Pf07368	0.106	0.01	-3.24	-6.64	1.12008e+06	118783	261897		1	1	1		0.072	0	2.84	1
FALSE	High	IsMasterProtein	Q9BUT9	Protein FAM195A OS=Homo sapiens GN=FAM195A PE=1 SV=2	FALSE	0	5.476	31.875	2	2	2	1	160	17.8	9.41	High	Not Found	High	Not Found		84331	ENSG00000172366.19	FAM195A; MCRIP2	16		cytoplasm;nucleus	protein binding	Pf14799	0.01	0.01	-6.64	-6.64	2377834		360532		1		1		0.778	0	0	2
FALSE	High	IsMasterProtein	Q9Y3F4-2	Isoform 2 of Serine-threonine kinase receptor-associated protein OS=Homo sapiens GN=STRAP	FALSE	0	5.469	12.6722	3	4	3	1	363	39.8	5.31	High	Peak Found	High	Peak Found	Dimethyl [K113; K135; K144; K150]	11171	ENSG00000023734.10	STRAP	12	cell organization and biogenesis;regulation of biological process	cytoplasm;cytosol	protein binding;RNA binding	Pf00400	0.665	0.467	-0.59	-1.1	2.7147e+06	1.80408e+06	4.2646e+06	1.99186e+06	1	1	2	2	0.334	0	0	3
FALSE	High	IsMasterProtein	Q14974	Importin subunit beta-1 OS=Homo sapiens GN=KPNB1 PE=1 SV=2	FALSE	0	5.44	2.62557	2	5	2	1	876	97.1	4.78	Peak Found	High	Peak Found	High		3837	ENSG00000108424.9	KPNB1	17	cell organization and biogenesis;cellular component movement;metabolic process;regulation of biological process;response to stimulus;transport	cytoplasm;cytosol;extracellular;membrane;nucleus;organelle lumen	metal ion binding;protein binding;RNA binding;transporter activity	Pf02985, Pf03810, Pf13513, Pf13646	1.763	2.278	0.82	1.19	2.18869e+06	3.85816e+06	3.57277e+06	8.13729e+06	1	1	2	2	0.17	0	0	2
FALSE	High	IsMasterProtein	P14373	Zinc finger protein RFP OS=Homo sapiens GN=TRIM27 PE=1 SV=1	FALSE	0	5.415	9.55166	3	4	3	1	513	58.5	6.21	High	Not Found	High	Not Found	Dimethyl [K276]	5987	ENSG00000234495.7; ENSG00000229006.7; ENSG00000204713.10; ENSG00000237071.7; ENSG00000215641.8	TRIM27	6; CHR_HSCHR6_MHC_APD_CTG1; CHR_HSCHR6_MHC_SSTO_CTG1; CHR_HSCHR6_MHC_COX_CTG1; CHR_HSCHR6_MHC_QBL_CTG1	cell organization and biogenesis;cell proliferation;defense response;metabolic process;regulation of biological process;response to stimulus;transport	chromosome;cytoplasm;cytosol;endosome;membrane;nucleus	catalytic activity;DNA binding;metal ion binding;protein binding;receptor activity;signal transducer activity	Pf00097, Pf00622, Pf00643, Pf09074, Pf13445, Pf13639, Pf13765, Pf13920, Pf13923, Pf15227	0.01	0.01	-6.64	-6.64	1.11181e+06		1.83011e+06		2		2		0.269	0	0	3
FALSE	High	IsMasterProtein	P46777	60S ribosomal protein L5 OS=Homo sapiens GN=RPL5 PE=1 SV=3	FALSE	0	5.409	8.75421	2	3	2	1	297	34.3	9.72	Peak Found	High	High	High	Dimethyl [K220; K221]	6125	ENSG00000122406.12	RPL5	1	cell organization and biogenesis;metabolic process;transport	cytoplasm;cytosol;membrane;nucleus;ribosome	protein binding;RNA binding;structural molecule activity	Pf00861, Pf14204	0.693	0.714	-0.53	-0.49	3.45242e+06	2.39235e+06	9.36823e+06	6.69315e+06	1	1	2	2	0.468	0	0	2
FALSE	High	IsMasterProtein	Q9H4G0-2	Isoform 2 of Band 4.1-like protein 1 OS=Homo sapiens GN=EPB41L1	FALSE	0	5.401	4.74968	3	3	3	1	779	87.6	5.92	Not Found	High	Not Found	Not Found		2036	ENSG00000088367.21	EPB41L1	20	cell organization and biogenesis	cytoskeleton;cytosol;membrane	protein binding;structural molecule activity	Pf00373, Pf04382, Pf05902, Pf08736, Pf09379, Pf09380	100		6.64			1.94973e+06				1			0.155	0	0	3
FALSE	High	IsMasterProtein	P46060	Ran GTPase-activating protein 1 OS=Homo sapiens GN=RANGAP1 PE=1 SV=1	FALSE	0	5.364	3.57751	2	3	2	1	587	63.5	4.68	Not Found	High	Peak Found	High		5905	ENSG00000100401.19	RANGAP1	22	cell organization and biogenesis;metabolic process;regulation of biological process;response to stimulus	chromosome;cytoplasm;cytoskeleton;cytosol;membrane;nucleus	enzyme regulator activity;protein binding	Pf07834, Pf13855		13.029		3.7			578374	7.5359e+06			1	1	0.145	0	3.75	2
FALSE	High	IsMasterProtein	Q96CS3	FAS-associated factor 2 OS=Homo sapiens GN=FAF2 PE=1 SV=2	FALSE	0	5.21	4.04494	1	1	1	1	445	52.6	5.62	High	Not Found	Not Found	Not Found	Dimethyl [K146]	23197	ENSG00000113194.12	FAF2	5	cell organization and biogenesis;metabolic process;regulation of biological process;response to stimulus;transport	cytoplasm;endoplasmic reticulum;extracellular;organelle lumen	enzyme regulator activity;protein binding	Pf00789, Pf14555	0.01		-6.64		712058				1				0.089	0	2.56	1
FALSE	High	IsMasterProtein	Q14498	RNA-binding protein 39 OS=Homo sapiens GN=RBM39 PE=1 SV=2	FALSE	0	5.185	2.07547	1	1	1	1	530	59.3	10.1	Not Found	Not Found	High	Peak Found	Dimethyl [K178]	9584	ENSG00000131051.22	RBM39	20	metabolic process;regulation of biological process	cytoskeleton;nucleus	nucleotide binding;protein binding;RNA binding	Pf00076, Pf13893, Pf14259, Pf15519		0.434		-1.2			2.31175e+06	1.00341e+06			1	1	0.086	0	2.17	1
FALSE	High	IsMasterProtein	P62318	Small nuclear ribonucleoprotein Sm D3 OS=Homo sapiens GN=SNRPD3 PE=1 SV=1	FALSE	0	5.168	7.14286	1	4	1	1	126	13.9	10.32	High	High	High	High	Dimethyl [K78]	6634	ENSG00000100028.11	SNRPD3	22	cell organization and biogenesis;metabolic process;transport	cytoplasm;cytosol;nucleus;spliceosomal complex	protein binding;RNA binding	Pf01423	0.368	0.696	-1.44	-0.52	1.45021e+07	5.33167e+06	5.76974e+06	4.01847e+06	1	1	1	1	0.668	0	5.3	1
FALSE	High	IsMasterProtein	P15927-3	Isoform 3 of Replication protein A 32 kDa subunit OS=Homo sapiens GN=RPA2	FALSE	0	5.152	10.0559	2	2	2	1	358	38.8	8.94	Peak Found	High	Not Found	Not Found		6118	ENSG00000117748.9	RPA2	1	cell organization and biogenesis;metabolic process;regulation of biological process;response to stimulus	chromosome;nucleus	DNA binding;protein binding	Pf08784	6.023		2.59		2.5946e+06	1.56277e+07			1	2			0.245	0	0	2
FALSE	High	IsMasterProtein	P12268	Inosine-5'-monophosphate dehydrogenase 2 OS=Homo sapiens GN=IMPDH2 PE=1 SV=2	FALSE	0	5.148	10.5058	3	3	3	1	514	55.8	6.9	High	Peak Found	Not Found	Not Found	Dimethyl [K293; K311; K511]	3615	ENSG00000178035.11	IMPDH2	3	cell organization and biogenesis;cell proliferation;metabolic process;response to stimulus;transport	cytoplasm;cytosol;extracellular;membrane;nucleus;organelle lumen	catalytic activity;DNA binding;metal ion binding;nucleotide binding;protein binding;RNA binding	Pf00478, Pf00571, Pf00977, Pf01070, Pf03060	0.249		-2.01		5.59548e+06	1.39334e+06			3	3			0.292	0	0	3
FALSE	High	IsMasterProtein	P40227	T-complex protein 1 subunit zeta OS=Homo sapiens GN=CCT6A PE=1 SV=3	FALSE	0	5.137	6.96798	2	2	2	1	531	58	6.68	High	Not Found	High	Peak Found	Dimethyl [K307; K424]	908	ENSG00000146731.10	CCT6A	7	metabolic process;regulation of biological process	cytoplasm;cytosol;membrane	nucleotide binding;protein binding;RNA binding	Pf00118, Pf05504	0.01	0.295	-6.64	-1.76	335426		1.95994e+06	577586	1		1	1	0.077	0	0	2
FALSE	High	IsMasterProtein	O43805	Sjoegren syndrome nuclear autoantigen 1 OS=Homo sapiens GN=SSNA1 PE=1 SV=2	FALSE	0	5.13	20.1681	2	2	2	1	119	13.6	5.38	High	Not Found	Not Found	Not Found	Dimethyl [K84; K97]	8636	ENSG00000176101.11	SSNA1	9	cell organization and biogenesis;cellular component movement;metabolic process;transport	cytoplasm;cytoskeleton;cytosol;nucleus	protein binding	Pf04111, Pf08149	0.01		-6.64		1.73498e+07				2				0.668	0	1.76	2
FALSE	High	IsMasterProtein	O95433	Activator of 90 kDa heat shock protein ATPase homolog 1 OS=Homo sapiens GN=AHSA1 PE=1 SV=1	FALSE	0	5.122	10.0592	2	3	2	1	338	38.3	5.53	High	Not Found	High	Not Found		10598	ENSG00000100591.7	AHSA1	14	regulation of biological process;response to stimulus	cytoplasm;cytosol;endoplasmic reticulum	enzyme regulator activity;protein binding	Pf08327, Pf09229	0.01	0.01	-6.64	-6.64	1.92974e+06		1.55151e+06		1		1		0.212	0	0	2
FALSE	High	IsMasterProtein	P29401-2	Isoform 2 of Transketolase OS=Homo sapiens GN=TKT	FALSE	0	4.99	2.69414	1	2	1	1	631	68.8	7.52	High	Not Found	High	Not Found	Dimethyl [K289]	7086	ENSG00000163931.15	TKT	3	metabolic process;regulation of biological process	cytosol	catalytic activity;metal ion binding;protein binding	Pf00456, Pf00676, Pf02779, Pf02780													0.064	0	2.69	1
FALSE	High	IsMasterProtein	P41091	Eukaryotic translation initiation factor 2 subunit 3 OS=Homo sapiens GN=EIF2S3 PE=1 SV=3	FALSE	0	4.973	2.33051	1	2	1	1	472	51.1	8.4	High	Peak Found	High	Peak Found		1968	ENSG00000130741.10	EIF2S3	X	cell organization and biogenesis;metabolic process;transport	cytoplasm;cytosol;nucleus	catalytic activity;nucleotide binding;protein binding;RNA binding	Pf00009, Pf03144, Pf09173	0.811	0.643	-0.3	-0.64	6.61215e+06	5.36383e+06	5.05343e+06	3.24912e+06	1	1	1	1	0.101	0	2.04	1
FALSE	High	IsMasterProtein	O75746	Calcium-binding mitochondrial carrier protein Aralar1 OS=Homo sapiens GN=SLC25A12 PE=1 SV=2	FALSE	0	4.936	4.57227	2	3	1	1	678	74.7	8.38	High	Not Found	High	Not Found	Dimethyl [K403]	8604	ENSG00000115840.13	SLC25A12	2	metabolic process;response to stimulus;transport	membrane;mitochondrion	metal ion binding;transporter activity	Pf00153, Pf13499	0.01	0.01	-6.64	-6.64	404298		510577		1		1		0.116	0	0	2
FALSE	High	IsMasterProtein	Q6UN15	Pre-mRNA 3'-end-processing factor FIP1 OS=Homo sapiens GN=FIP1L1 PE=1 SV=1	FALSE	0	4.924	7.57576	3	4	3	1	594	66.5	5.59	Not Found	Not Found	High	Peak Found	Dimethyl [K167; K186; K210; K265]	81608	ENSG00000145216.15	FIP1L1	4	metabolic process;transport	nucleus	protein binding;RNA binding	Pf05182		0.094		-3.42			2.79016e+06	261556			1	1	0.334	0	0	3
FALSE	High	IsMasterProtein	Q9NR12	PDZ and LIM domain protein 7 OS=Homo sapiens GN=PDLIM7 PE=1 SV=1	FALSE	0	4.919	7.00219	2	2	2	1	457	49.8	8.41	Not Found	Not Found	Not Found	High		9260	ENSG00000196923.13	PDLIM7	5	cell differentiation;cell organization and biogenesis;cellular component movement;development;regulation of biological process;transport	cytoplasm;cytoskeleton;cytosol;nucleus	metal ion binding;protein binding	Pf00412, Pf00595		100		6.64				6.26812e+06				2	0.172	0	0	2
FALSE	High	IsMasterProtein	Q71UM5	40S ribosomal protein S27-like OS=Homo sapiens GN=RPS27L PE=1 SV=3	FALSE	0	4.908	28.5714	2	2	1	1	84	9.5	9.45	Not Found	Not Found	High	Not Found	Dimethyl [K16; K36]	51065	ENSG00000185088.13	RPS27L	15	cell organization and biogenesis;metabolic process;regulation of biological process;response to stimulus	nucleus;ribosome	enzyme regulator activity;metal ion binding;protein binding;RNA binding;structural molecule activity;translation regulator activity	Pf01667		0.01		-6.64			3033819				1		1.512	0	0	2
FALSE	High	IsMasterProtein	P11177	Pyruvate dehydrogenase E1 component subunit beta, mitochondrial OS=Homo sapiens GN=PDHB PE=1 SV=3	FALSE	0	4.895	8.91365	2	2	2	1	359	39.2	6.65	High	Peak Found	High	Peak Found	Dimethyl [K68; K285]	5162	ENSG00000168291.12	PDHB	3	metabolic process;regulation of biological process	mitochondrion;nucleus;organelle lumen	catalytic activity;protein binding	Pf02779, Pf02780	0.158	0.131	-2.66	-2.93	4.50377e+06	712221	2.66092e+06	349816	1	1	1	1	0.292	0	0	2
FALSE	High	IsMasterProtein	P07814	Bifunctional glutamate/proline--tRNA ligase OS=Homo sapiens GN=EPRS PE=1 SV=5	FALSE	0	4.877	2.38095	2	3	2	1	1512	170.5	7.33	High	Not Found	High	Peak Found	Dimethyl [K1484; K1494]	2058	ENSG00000136628.17	EPRS	1	cell organization and biogenesis;metabolic process;regulation of biological process;response to stimulus	cytoplasm;cytosol;membrane	catalytic activity;nucleotide binding;protein binding;RNA binding	Pf00458, Pf00587, Pf00749, Pf01406, Pf03129, Pf03950, Pf09180, Pf14497		0.104		-3.27			9.57869e+06	993130			2	2	0.051	0	0	2
FALSE	High	IsMasterProtein	P59998-2	Isoform 2 of Actin-related protein 2/3 complex subunit 4 OS=Homo sapiens GN=ARPC4	FALSE	0	4.822	1.76	1	3	1	1	625	71.7	5.88	High	Peak Found	High	High		100526693	ENSG00000250151.9	ARPC4-TTLL3	3	cell organization and biogenesis;metabolic process;regulation of biological process	cytoskeleton		Pf03133, Pf05856	3.722	2.505	1.9	1.32	3.88768e+06	1.447e+07	3.59859e+06	9.0132e+06	1	1	1	1	0.133	0	1.72	1
FALSE	High	IsMasterProtein	P50402	Emerin OS=Homo sapiens GN=EMD PE=1 SV=1	FALSE	0	4.813	11.811	2	2	2	1	254	29	5.5	High	Peak Found	High	Peak Found		2010	ENSG00000102119.10	EMD	X	cell differentiation;cell organization and biogenesis;regulation of biological process;response to stimulus	endoplasmic reticulum;membrane;nucleus	protein binding	Pf03020	0.207	0.161	-2.27	-2.63	6.67112e+06	1.38166e+06	4.39601e+06	708716	1	1	1	1	0.359	0	0	2
FALSE	High	IsMasterProtein	Q9BSD7	Cancer-related nucleoside-triphosphatase OS=Homo sapiens GN=NTPCR PE=1 SV=1	FALSE	0	4.715	20	2	2	2	1	190	20.7	9.54	High	Not Found	Not Found	Not Found	Dimethyl [K148]	84284	ENSG00000135778.11	NTPCR	1	metabolic process;response to stimulus	membrane	catalytic activity;nucleotide binding;RNA binding	Pf00004, Pf00910, Pf01583, Pf03029, Pf03266, Pf05496, Pf07726, Pf07728, Pf13173, Pf13191, Pf13207, Pf13238	0.01		-6.64		583113				2				0.389	0	0	2
FALSE	High	IsMasterProtein	P36542	ATP synthase subunit gamma, mitochondrial OS=Homo sapiens GN=ATP5C1 PE=1 SV=1	FALSE	0	4.713	4.02685	1	1	1	1	298	33	9.22	Not Found	Not Found	High	Not Found	Dimethyl [K112]	509	ENSG00000165629.19	ATP5C1	10	metabolic process;transport	membrane;mitochondrion;organelle lumen	catalytic activity;RNA binding;transporter activity	Pf00231													0.136	0	2.87	1
FALSE	High	IsMasterProtein	Q14192	Four and a half LIM domains protein 2 OS=Homo sapiens GN=FHL2 PE=1 SV=3	FALSE	0	4.71	15.7706	3	3	3	1	279	32.2	7.55	Peak Found	High	High	Peak Found	Dimethyl [K100; K219]	2274	ENSG00000115641.18	FHL2	2	cell differentiation;metabolic process;regulation of biological process;response to stimulus	cytoplasm;nucleus	metal ion binding;protein binding	Pf00412	0.231	0.321	-2.12	-1.64	6.80074e+06	1.56837e+06	780188	250705	1	1	2	1	0.389	0	0	3
FALSE	High	IsMasterProtein	P17980	26S protease regulatory subunit 6A OS=Homo sapiens GN=PSMC3 PE=1 SV=3	FALSE	0	4.706	8.42825	2	2	2	1	439	49.2	5.24	High	Not Found	High	Not Found	Dimethyl [K278; K294; K327]	5702	ENSG00000165916.8	PSMC3	11	metabolic process;regulation of biological process;response to stimulus;transport	cytoplasm;cytosol;extracellular;membrane;nucleus;organelle lumen;proteasome	catalytic activity;enzyme regulator activity;nucleotide binding;protein binding	Pf00004, Pf01078, Pf05496, Pf07724, Pf07728, Pf13191	0.01	0.01	-6.64	-6.64	569263		276449		1		1		0.186	0	2.06	2
FALSE	High	IsMasterProtein	Q9Y265	RuvB-like 1 OS=Homo sapiens GN=RUVBL1 PE=1 SV=1	FALSE	0.002	4.673	3.50877	1	2	1	1	456	50.2	6.42	High	Not Found	High	Not Found		8607	ENSG00000175792.11	RUVBL1	3	cell division;cell organization and biogenesis;metabolic process;regulation of biological process;response to stimulus	cytoplasm;cytoskeleton;cytosol;membrane;nucleus	catalytic activity;nucleotide binding;protein binding	Pf00004, Pf01078, Pf01695, Pf05496, Pf06068, Pf06414, Pf07726, Pf13191, Pf13238, Pf13245, Pf13481		0.01		-6.64			537413				1		0.101	0	0	1
FALSE	High	IsMasterProtein	P01605	Ig kappa chain V-I region Lay OS=Homo sapiens PE=1 SV=1	FALSE	0.002	4.605	14.8148	1	3	1	1	108	11.8	7.96	Peak Found	High	Peak Found	High								protein binding	Pf00047, Pf07679, Pf07686, Pf13895, Pf13927	6.054	6.747	2.6	2.75	1.60803e+07	9.73487e+07	8.80812e+06	5.94271e+07	1	1	1	1	1.512	0	0	1
FALSE	High	IsMasterProtein	P40616	ADP-ribosylation factor-like protein 1 OS=Homo sapiens GN=ARL1 PE=1 SV=1	FALSE	0.002	4.578	8.83978	1	1	1	1	181	20.4	5.72	High	Not Found	Not Found	Not Found	Dimethyl [K178]	400	ENSG00000120805.13	ARL1	12	cell organization and biogenesis;metabolic process;regulation of biological process;response to stimulus;transport	cytoplasm;cytosol;Golgi;membrane	catalytic activity;enzyme regulator activity;metal ion binding;nucleotide binding;protein binding;signal transducer activity	Pf00025, Pf00071, Pf00503, Pf01926, Pf04670, Pf08477, Pf09439													0.259	0	2.45	1
FALSE	High	IsMasterProtein	Q01813	ATP-dependent 6-phosphofructokinase, platelet type OS=Homo sapiens GN=PFKP PE=1 SV=2	FALSE	0.002	4.448	4.33673	2	2	2	1	784	85.5	7.55	High	Peak Found	Not Found	Not Found	Dimethyl [K139]	5214	ENSG00000067057.16	PFKP	10	metabolic process	cytoplasm;cytosol;membrane;nucleus	catalytic activity;metal ion binding;nucleotide binding;protein binding	Pf00365	0.035		-4.83		2.00115e+06	70457.4			2	1			0.116	0	0	2
FALSE	High	IsMasterProtein	P22234-2	Isoform 2 of Multifunctional protein ADE2 OS=Homo sapiens GN=PAICS	FALSE	0.002	4.395	4.62963	1	2	1	1	432	47.9	7.69	High	High	Not Found	Not Found	Dimethyl [K320]	10606	ENSG00000128050.8	PAICS	4	metabolic process	cytoplasm;cytosol;membrane	catalytic activity;nucleotide binding;protein binding	Pf00731, Pf01259	0.238		-2.07		1.81219e+06	432116			1	1			0.179	0	0	1
FALSE	High	IsMasterProtein	O75340	Programmed cell death protein 6 OS=Homo sapiens GN=PDCD6 PE=1 SV=1	FALSE	0.002	4.39	12.5654	2	2	2	1	191	21.9	5.4	Not Found	Not Found	High	Peak Found	Dimethyl [K90]	10016	ENSG00000249915.7	PDCD6	5	cell death;metabolic process;regulation of biological process;response to stimulus;transport	cytoplasm;endoplasmic reticulum;endosome;membrane;nucleus	catalytic activity;metal ion binding;protein binding	Pf00036, Pf13405, Pf13499, Pf13833		0.083		-3.59			6.53318e+06	541316			2	2	0.52	0	0	2
FALSE	High	IsMasterProtein	Q15018	BRISC complex subunit Abro1 OS=Homo sapiens GN=FAM175B PE=1 SV=2	FALSE	0.002	4.37	6.50602	2	3	2	1	415	46.9	6.21	High	Not Found	High	Not Found	Dimethyl [K74; K174]	23172	ENSG00000165660.7	FAM175B	10	cell division;cell organization and biogenesis;metabolic process;response to stimulus	cytoplasm;cytoskeleton;cytosol;nucleus	protein binding	Pf00261	0.01	0.01	-6.64	-6.64	4.74856e+06		2.01323e+06		2		1		0.222	0	0	2
FALSE	High	IsMasterProtein	Q8NCA5	Protein FAM98A OS=Homo sapiens GN=FAM98A PE=1 SV=1	FALSE	0.002	4.356	2.31214	1	2	1	1	519	55.4	9.03	High	Peak Found	High	Peak Found		25940		FAM98A	2			protein binding;RNA binding	Pf10239	0.239	0.392	-2.07	-1.35	1.43437e+07	3.4245e+06	5.27473e+06	2.06856e+06	1	1	1	1	0.093	0	2.02	1
FALSE	High	IsMasterProtein	P30837	Aldehyde dehydrogenase X, mitochondrial OS=Homo sapiens GN=ALDH1B1 PE=1 SV=3	FALSE	0.002	4.344	5.22244	2	2	2	1	517	57.2	6.8	High	Not Found	High	Not Found	Dimethyl [K226; K379]	219		ALDH1B1	9	metabolic process	mitochondrion;organelle lumen	catalytic activity	Pf00171	0.01	0.01	-6.64	-6.64	2.06465e+06		500801		1		1		0.172	0	0	2
FALSE	High	IsMasterProtein	P80723	Brain acid soluble protein 1 OS=Homo sapiens GN=BASP1 PE=1 SV=2	FALSE	0.002	4.311	23.348	2	2	2	1	227	22.7	4.63	High	Peak Found	Peak Found	High	Dimethyl [K210; K226]	10409	ENSG00000176788.8	BASP1	5	cell differentiation;cell organization and biogenesis;regulation of biological process	cytoplasm;cytoskeleton;membrane;nucleus	DNA binding;protein binding		0.783	0.835	-0.35	-0.26	1.154e+07	9.04046e+06	2.61303e+06	2.18066e+06	1	1	1	1	0.425	0	0	2
FALSE	High	IsMasterProtein	Q04760	Lactoylglutathione lyase OS=Homo sapiens GN=GLO1 PE=1 SV=4	FALSE	0.002	4.294	10.8696	1	2	1	1	184	20.8	5.31	Not Found	High	Not Found	High		2739	ENSG00000124767.6	GLO1	6	cell differentiation;metabolic process;regulation of biological process	cytoplasm;cytosol;membrane;nucleus	catalytic activity;metal ion binding	Pf00903, Pf12681, Pf13669		100		6.64				174222				1	0.212	0	2.57	1
FALSE	High	IsMasterProtein	P15531-2	Isoform 2 of Nucleoside diphosphate kinase A OS=Homo sapiens GN=NME1	FALSE	0.002	4.282	6.77966	1	2	1	1	177	19.6	5.58	High	High	Not Found	Not Found	Dimethyl [K37]	4830	ENSG00000239672.7	NME1	17	cell differentiation;metabolic process;regulation of biological process;transport	cytoplasm;cytosol;membrane;nucleus	catalytic activity;metal ion binding;nucleotide binding;protein binding;RNA binding	Pf00334	0.571		-0.81		6.3199e+06	3.6068e+06			1	1			0.52	0	0	1
FALSE	High	IsMasterProtein	P00450	Ceruloplasmin OS=Homo sapiens GN=CP PE=1 SV=1	FALSE	0.002	4.266	2.62911	2	3	2	1	1065	122.1	5.72	High	Peak Found	High	High	Dimethyl [K201]	1356		CP	3	cellular homeostasis;metabolic process;transport	extracellular;membrane	catalytic activity;metal ion binding;protein binding	Pf00394, Pf07731, Pf07732	0.934	1.075	-0.1	0.1	780959	729378	1.09307e+06	1.17508e+06	1	1	1	1	0.087	0	4.03	2
FALSE	High	IsMasterProtein	A8MWD9	Putative small nuclear ribonucleoprotein G-like protein 15 OS=Homo sapiens GN=SNRPGP15 PE=5 SV=2	FALSE	0.002	4.212	17.1053	1	1	1	1	76	8.5	8.84	High	Not Found	Not Found	Not Found		100130932		LOC100130932; SNRPGP15	19	cell organization and biogenesis;metabolic process	nucleus;spliceosomal complex	RNA binding	Pf01423													0.585	0	2.45	1
FALSE	High	IsMasterProtein	Q6ZSZ5	Rho guanine nucleotide exchange factor 18 OS=Homo sapiens GN=ARHGEF18 PE=1 SV=3	FALSE	0.002	4.209	3.32481	2	2	2	1	1173	130.7	7.08	Not Found	Not Found	High	Not Found	Dimethyl [K1162]	23370	ENSG00000104880.17	ARHGEF18	19	cell organization and biogenesis;regulation of biological process;response to stimulus	cytoplasm;cytoskeleton;cytosol;membrane		Pf00169, Pf00621		0.01		-6.64			1.18747e+06				2		0.073	0	0	2
FALSE	High	IsMasterProtein	O75717	WD repeat and HMG-box DNA-binding protein 1 OS=Homo sapiens GN=WDHD1 PE=1 SV=1	FALSE	0.002	4.192	2.65722	2	2	2	1	1129	125.9	5.62	High	Not Found	Not Found	Not Found	Dimethyl [K798]	11169	ENSG00000198554.11	WDHD1	14		cytoplasm;nucleus	DNA binding;protein binding	Pf00400, Pf00505, Pf08662													0.075	0	2.09	2
FALSE	High	IsMasterProtein	P31153	S-adenosylmethionine synthase isoform type-2 OS=Homo sapiens GN=MAT2A PE=1 SV=1	FALSE	0.002	4.182	7.59494	2	2	2	1	395	43.6	6.48	High	Not Found	High	Peak Found		4144	ENSG00000168906.12	MAT2A	2	cell organization and biogenesis;metabolic process	cytosol	catalytic activity;metal ion binding;nucleotide binding;protein binding	Pf00438, Pf02772, Pf02773		0.089		-3.5			8.3473e+06	739970			1	1	0.222	0	0	2
FALSE	High	IsMasterProtein	P47755	F-actin-capping protein subunit alpha-2 OS=Homo sapiens GN=CAPZA2 PE=1 SV=3	FALSE	0.002	4.174	10.1399	2	2	1	1	286	32.9	5.85	Peak Found	High	Not Found	Not Found		830	ENSG00000198898.13	CAPZA2	7	cell organization and biogenesis;cellular component movement;coagulation;defense response;regulation of biological process;response to stimulus	cytoskeleton;cytosol;extracellular;membrane	protein binding	Pf01267	2.36		1.24		2.38349e+06	5.62611e+06			1	1			0.359	0	0	2
FALSE	High	IsMasterProtein	Q06787	Fragile X mental retardation protein 1 OS=Homo sapiens GN=FMR1 PE=1 SV=1	FALSE	0.002	4.161	4.58861	2	2	1	1	632	71.1	7.42	Not Found	Not Found	Not Found	High		2332	ENSG00000102081.13	FMR1	X	metabolic process;regulation of biological process;response to stimulus;transport	chromosome;cytoplasm;cytosol;membrane;nucleus;ribosome	protein binding;RNA binding;translation regulator activity	Pf00013, Pf05641, Pf12235, Pf13014		3.732		1.9			555427	2.07279e+06			1	1	0.122	1	0	2
FALSE	High	IsMasterProtein	Q10570	Cleavage and polyadenylation specificity factor subunit 1 OS=Homo sapiens GN=CPSF1 PE=1 SV=2	FALSE	0.002	4.158	1.386	2	2	2	1	1443	160.8	6.4	Not Found	Not Found	High	Peak Found		29894	ENSG00000071894.16	CPSF1	8	metabolic process;transport	nucleus	protein binding;RNA binding	Pf03178, Pf10433		0.097		-3.37			3.92967e+06	380932			2	1	0.055	0	1.73	2
FALSE	High	IsMasterProtein	P02794	Ferritin heavy chain OS=Homo sapiens GN=FTH1 PE=1 SV=2	FALSE	0.002	4.003	6.01093	1	2	1	1	183	21.2	5.55	Not Found	Not Found	Peak Found	High	Dimethyl [K120]	2495	ENSG00000167996.15	FTH1	11	cellular homeostasis;metabolic process;regulation of biological process;response to stimulus;transport	cytoplasm;cytosol;extracellular;mitochondrion;nucleus;vacuole	catalytic activity;metal ion binding;protein binding	Pf00210		0.781		-0.36			1.29165e+07	1.00838e+07			1	1	0.468	0	0	1
FALSE	High	IsMasterProtein	P55735-3	Isoform 3 of Protein SEC13 homolog OS=Homo sapiens GN=SEC13	FALSE	0.002	3.967	6.25	1	1	1	1	368	40.7	5.85	High	Not Found	Not Found	Not Found		6396	ENSG00000157020.17	SEC13	3	cell organization and biogenesis;regulation of biological process;transport	chromosome;cytosol;membrane	protein binding	Pf00400	0.01		-6.64		618706				1				0.166	0	2.22	1
FALSE	High	IsMasterProtein	P43246	DNA mismatch repair protein Msh2 OS=Homo sapiens GN=MSH2 PE=1 SV=1	FALSE	0.002	3.934	2.99786	2	2	2	1	934	104.7	5.77	High	Not Found	High	Not Found		4436	ENSG00000095002.13	MSH2	2	cell differentiation;cell organization and biogenesis;metabolic process;regulation of biological process;response to stimulus	membrane;nucleus	catalytic activity;DNA binding;metal ion binding;nucleotide binding;protein binding	Pf00488, Pf01624, Pf05188, Pf05190, Pf05192	0.01	0.01	-6.64	-6.64	205509		1.16986e+06		1		1		0.091	0	0	2
FALSE	High	IsMasterProtein	P54136	Arginine--tRNA ligase, cytoplasmic OS=Homo sapiens GN=RARS PE=1 SV=2	FALSE	0.002	3.897	3.18182	2	2	2	1	660	75.3	6.68	Not Found	Not Found	High	Peak Found		5917	ENSG00000113643.8	RARS	5	metabolic process	cytoplasm;cytosol;membrane;mitochondrion	catalytic activity;nucleotide binding;protein binding;RNA binding	Pf00750, Pf03485, Pf05746		0.141		-2.82			2.60014e+06	367075			2	1	0.113	0	0	2
FALSE	High	IsMasterProtein	Q99470	Stromal cell-derived factor 2 OS=Homo sapiens GN=SDF2 PE=1 SV=2	FALSE	0.002	3.823	17.5355	2	3	2	1	211	23	7.33	High	Not Found	High	Not Found	Dimethyl [K174; K197; K203]	6388	ENSG00000132581.9	SDF2	17	metabolic process;response to stimulus	extracellular;membrane	catalytic activity	Pf02815	0.01	0.01	-6.64	-6.64	1.06983e+06		2.77256e+06		1		2		0.52	0	0	2
FALSE	High	IsMasterProtein	Q14527	Helicase-like transcription factor OS=Homo sapiens GN=HLTF PE=1 SV=2	FALSE	0.002	3.801	4.06343	2	2	2	1	1009	113.9	8.6	High	Not Found	Not Found	Not Found	Dimethyl [K452]	6596	ENSG00000071794.15	HLTF	3	cell organization and biogenesis;metabolic process;regulation of biological process;response to stimulus	cytoplasm;membrane;nucleus	catalytic activity;DNA binding;metal ion binding;nucleotide binding;protein binding;RNA binding	Pf00097, Pf00176, Pf00271, Pf08797, Pf12678, Pf12861, Pf13445, Pf13639, Pf13920, Pf13923, Pf14634, Pf15227	0.01		-6.64		395588				1				0.077	0	0	2
FALSE	High	IsMasterProtein	O75477	Erlin-1 OS=Homo sapiens GN=ERLIN1 PE=1 SV=1	FALSE	0.002	3.784	6.06936	2	2	2	1	346	38.9	7.87	High	Peak Found	Not Found	Not Found	Dimethyl [K190]	10613		ERLIN1	10	metabolic process;regulation of biological process;response to stimulus;transport	endoplasmic reticulum;membrane	protein binding	Pf01145	0.094		-3.41		6.29662e+06	591297			1	1			0.212	0	0	2
FALSE	High	IsMasterProtein	P46779-3	Isoform 3 of 60S ribosomal protein L28 OS=Homo sapiens GN=RPL28	FALSE	0.002	3.714	11.2426	2	2	2	1	169	19.1	10.83	Not Found	Not Found	High	Peak Found	Dimethyl [K19]	6158	ENSG00000108107.14	RPL28	19	cell organization and biogenesis;metabolic process;regulation of biological process;transport	cytosol;membrane	protein binding;RNA binding;structural molecule activity	Pf01778		0.88		-0.18			1.63772e+07	1.4417e+07			1	1	0.425	0	0	2
FALSE	High	IsMasterProtein	P43686	26S protease regulatory subunit 6B OS=Homo sapiens GN=PSMC4 PE=1 SV=2	FALSE	0.005	3.699	4.54545	1	1	1	1	418	47.3	5.21	High	Not Found	Not Found	Not Found	Dimethyl [K306]	5704	ENSG00000281221.2; ENSG00000013275.7	PSMC4	19; CHR_HG2021_PATCH	metabolic process;regulation of biological process;response to stimulus;transport	cytoplasm;cytosol;membrane;nucleus;proteasome	catalytic activity;nucleotide binding;protein binding;RNA binding	Pf00004, Pf00006, Pf00910, Pf01057, Pf01078, Pf05496, Pf07724, Pf07726, Pf07728, Pf13191													0.096	0	0	1
FALSE	High	IsMasterProtein	P83881	60S ribosomal protein L36a OS=Homo sapiens GN=RPL36A PE=1 SV=2	FALSE	0.005	3.695	19.8113	2	2	2	1	106	12.4	10.58	High	Peak Found	High	Not Found	Dimethyl [K53; K97]	6173	ENSG00000241343.9	RPL36A	X	cell organization and biogenesis;metabolic process;transport	cytoplasm;cytosol;membrane;ribosome	protein binding;RNA binding;structural molecule activity	Pf00935	0.125		-3		1.55518e+07	1.94953e+06			1	1			1.154	0	0	2
FALSE	High	IsMasterProtein	Q7RTV0	PHD finger-like domain-containing protein 5A OS=Homo sapiens GN=PHF5A PE=1 SV=1	FALSE	0.005	3.674	22.7273	2	2	2	1	110	12.4	8.41	High	Peak Found	Not Found	Not Found	Dimethyl [K73]	84844	ENSG00000100410.7	PHF5A	22	metabolic process;regulation of biological process	nucleus;spliceosomal complex	DNA binding;RNA binding	Pf03660													0.778	0	0	2
FALSE	High	IsMasterProtein	Q12772	Sterol regulatory element-binding protein 2 OS=Homo sapiens GN=SREBF2 PE=1 SV=2	FALSE	0.005	3.65	0.964067	1	1	1	1	1141	123.6	8.4	High	Not Found	Not Found	Not Found	Dimethyl [K918]	6721	ENSG00000198911.11	SREBF2	22	cell communication;metabolic process;regulation of biological process;response to stimulus	cytoplasm;cytosol;endoplasmic reticulum;Golgi;membrane;mitochondrion;nucleus	catalytic activity;DNA binding;protein binding	Pf00010	0.01		-6.64		2.83648e+06				1				0.04	0	1.71	1
FALSE	High	IsMasterProtein	Q9H147	Deoxynucleotidyltransferase terminal-interacting protein 1 OS=Homo sapiens GN=DNTTIP1 PE=1 SV=2	FALSE	0.005	3.637	12.766	2	2	2	1	329	37	8.97	Not Found	Not Found	High	Not Found	Dimethyl [K43; K88]	116092	ENSG00000101457.12	DNTTIP1	20	metabolic process;regulation of biological process	nucleus	DNA binding;protein binding			0.01		-6.64			686412				2		0.186	0	0	2
FALSE	High	IsMasterProtein	Q86TG7	Retrotransposon-derived protein PEG10 OS=Homo sapiens GN=PEG10 PE=1 SV=2	FALSE	0.005	3.613	5.08475	2	2	2	1	708	80.1	6.39	High	Not Found	High	Not Found		23089		PEG10	7	cell death;cell differentiation;cell organization and biogenesis;regulation of biological process;reproduction	cytoplasm;cytosol;nucleus	DNA binding;metal ion binding;protein binding;RNA binding	Pf03732, Pf06005, Pf08284, Pf13650, Pf13975, Pf14662, Pf15035	0.01	0.01	-6.64	-6.64	181491		529965		1		1		0.155	0	0	2
FALSE	High	IsMasterProtein	P01608	Ig kappa chain V-I region Roy OS=Homo sapiens PE=1 SV=1	FALSE	0.005	3.602	7.40741	1	4	1	1	108	11.8	5.36	High	High	High	High	Dimethyl [K53]							protein binding	Pf07686	0.933	1.647	-0.1	0.72	5.1415e+07	4.7965e+07	5.1647e+07	8.50737e+07	1	1	1	1	1.512	0	7.32	1
FALSE	High	IsMasterProtein	P31949	Protein S100-A11 OS=Homo sapiens GN=S100A11 PE=1 SV=2	FALSE	0.005	3.587	15.2381	1	1	1	1	105	11.7	7.12	High	Not Found	Not Found	Not Found	Dimethyl [K52]	6282	ENSG00000163191.5	S100A11	1	regulation of biological process;response to stimulus;transport	cytoplasm;extracellular;nucleus;organelle lumen	metal ion binding;protein binding	Pf00036, Pf01023, Pf13499, Pf13833	0.01		-6.64		301546				1				0.389	0	2.2	1
FALSE	High	IsMasterProtein	P10515	Dihydrolipoyllysine-residue acetyltransferase component of pyruvate dehydrogenase complex, mitochondrial OS=Homo sapiens GN=DLAT PE=1 SV=3	FALSE	0.005	3.583	2.47295	2	4	2	1	647	69	7.84	High	Peak Found	High	Peak Found	Dimethyl [K362; K376]	1737	ENSG00000150768.15	DLAT	11	metabolic process;regulation of biological process	mitochondrion;organelle lumen	catalytic activity;protein binding	Pf00198, Pf00364, Pf02817	0.549	0.524	-0.87	-0.93	9.85552e+06	5.40903e+06	1.08157e+07	5.66947e+06	2	2	2	2	0.15	0	0	2
FALSE	High	IsMasterProtein	Q7Z7H8-2	Isoform 2 of 39S ribosomal protein L10, mitochondrial OS=Homo sapiens GN=MRPL10	FALSE	0.005	3.572	7.01107	1	1	1	1	271	30.3	9.25	High	Not Found	Not Found	Not Found		124995	ENSG00000159111.12	MRPL10	17	cell organization and biogenesis;metabolic process	membrane;mitochondrion	protein binding;RNA binding;structural molecule activity	Pf00466	0.01		-6.64		193528				1				0.212	0	0	1
FALSE	High	IsMasterProtein	Q9P0L0-2	Isoform 2 of Vesicle-associated membrane protein-associated protein A OS=Homo sapiens GN=VAPA	FALSE	0.005	3.558	11.5646	2	2	2	1	294	32.6	8.91	Peak Found	High	High	Peak Found	Dimethyl [K114]	9218	ENSG00000101558.13	VAPA	18	cell death;cell organization and biogenesis;metabolic process;regulation of biological process;response to stimulus;transport	cytoskeleton;endoplasmic reticulum;membrane	protein binding;signal transducer activity	Pf00635	0.98	0.895	-0.03	-0.16	1.46834e+06	1.43862e+06	628072	562004	1	1	1	1	0.311	0	0	2
FALSE	High	IsMasterProtein	P09661	U2 small nuclear ribonucleoprotein A' OS=Homo sapiens GN=SNRPA1 PE=1 SV=2	FALSE	0.005	3.553	6.66667	1	1	1	1	255	28.4	8.62	High	Not Found	Not Found	Not Found		6627	ENSG00000131876.16	SNRPA1	15	metabolic process	nucleus;spliceosomal complex	protein binding;RNA binding	Pf12799, Pf13855, Pf14580	0.01		-6.64		1072232				1				0.166	0	0	1
FALSE	High	IsMasterProtein	P25205-2	Isoform 2 of DNA replication licensing factor MCM3 OS=Homo sapiens GN=MCM3	FALSE	0.005	3.528	4.45487	2	2	2	1	853	95.8	5.77	Not Found	Not Found	High	Peak Found	Dimethyl [K80; K700]	4172	ENSG00000112118.18	MCM3	6	metabolic process	membrane;nucleus	catalytic activity;DNA binding;nucleotide binding;protein binding	Pf00493, Pf01078, Pf07728, Pf14551		0.109		-3.2			878779	95528.2			1	1	0.078	0	0	2
FALSE	High	IsMasterProtein	P51116	Fragile X mental retardation syndrome-related protein 2 OS=Homo sapiens GN=FXR2 PE=1 SV=2	FALSE	0.005	3.526	4.60624	2	2	1	1	673	74.2	6.23	Not Found	Not Found	Peak Found	High		9513	ENSG00000129245.11	FXR2	17	regulation of biological process	cytoplasm;cytosol;membrane;nucleus	protein binding;RNA binding	Pf00013, Pf05641, Pf12235, Pf13014		3.548		1.83			828929	2.94079e+06			1	1	0.11	0	0	2
FALSE	High	IsMasterProtein	Q9HCN8	Stromal cell-derived factor 2-like protein 1 OS=Homo sapiens GN=SDF2L1 PE=1 SV=2	FALSE	0.005	3.487	15.8371	2	2	2	1	221	23.6	7.03	High	Not Found	Not Found	Not Found	Dimethyl [K43]	23753	ENSG00000128228.4	SDF2L1	22	metabolic process;regulation of biological process;response to stimulus	endoplasmic reticulum;membrane;organelle lumen	catalytic activity;protein binding	Pf02815	0.01		-6.64		3.49879e+06				1				0.389	0	0	2
FALSE	High	IsMasterProtein	P52701	DNA mismatch repair protein Msh6 OS=Homo sapiens GN=MSH6 PE=1 SV=2	FALSE	0.005	3.483	0.882353	1	1	1	1	1360	152.7	6.9	High	Not Found	Not Found	Not Found	Dimethyl [K866]	2956	ENSG00000116062.14	MSH6	2	cell organization and biogenesis;metabolic process;regulation of biological process;response to stimulus	chromosome;cytosol;Golgi;nucleus	catalytic activity;DNA binding;metal ion binding;nucleotide binding;protein binding	Pf00488, Pf00855, Pf01624, Pf05188, Pf05190, Pf05192	0.01		-6.64		430426				1				0.029	0	0	1
FALSE	High	IsMasterProtein	Q9HCE1	Putative helicase MOV-10 OS=Homo sapiens GN=MOV10 PE=1 SV=2	FALSE	0.005	3.443	1.89432	2	2	2	1	1003	113.6	8.82	High	Peak Found	High	Peak Found	Dimethyl [K489; K714]	4343	ENSG00000155363.18	MOV10	1	metabolic process;regulation of biological process;response to stimulus	cytoplasm;cytosol	catalytic activity;nucleotide binding;protein binding;RNA binding	Pf13086, Pf13087, Pf13245, Pf13401, Pf13604	0.218	0.485	-2.2	-1.04	3.63562e+06	790895	2.14285e+06	1.03937e+06	1	1	1	1	0.077	0	0	2
FALSE	High	IsMasterProtein	P49207	60S ribosomal protein L34 OS=Homo sapiens GN=RPL34 PE=1 SV=3	FALSE	0.005	3.439	12.8205	2	3	2	1	117	13.3	11.47	Peak Found	High	Peak Found	High		6164	ENSG00000109475.16	RPL34	4	cell organization and biogenesis;metabolic process;transport	cytosol;mitochondrion;ribosome	protein binding;RNA binding;structural molecule activity	Pf01199	0.708	1.201	-0.5	0.26	2.8658e+07	2.02946e+07	2.51466e+07	3.02129e+07	1	1	1	1	1.154	0	3.79	2
FALSE	High	IsMasterProtein	P53621-2	Isoform 2 of Coatomer subunit alpha OS=Homo sapiens GN=COPA	FALSE	0.005	3.329	1.62206	2	3	2	1	1233	139.2	7.59	High	Peak Found	High	Peak Found	Dimethyl [K834]	1314	ENSG00000122218.14	COPA	1	transport	cytoplasm;cytosol;membrane	protein binding;structural molecule activity	Pf00400, Pf04053, Pf06957	0.228	0.11	-2.13	-3.18	3.62118e+06	825551	6.1441e+06	677078	1	1	2	2	0.06	0	0	2
FALSE	High	IsMasterProtein	P81605-2	Isoform 2 of Dermcidin OS=Homo sapiens GN=DCD	FALSE	0.005	3.299	9.09091	1	1	1	1	121	12.4	7.97	Not Found	Not Found	Peak Found	High		117159	ENSG00000161634.11	DCD	12	defense response;metabolic process;response to stimulus	extracellular	catalytic activity;protein binding;RNA binding	Pf15291		1.234		0.3			3.78176e+06	4.66685e+06			1	1	0.334	0	1.72	1
FALSE	High	IsMasterProtein	P13861	cAMP-dependent protein kinase type II-alpha regulatory subunit OS=Homo sapiens GN=PRKAR2A PE=1 SV=2	FALSE	0.005	3.254	4.20792	1	2	1	1	404	45.5	5.07	High	Not Found	High	Not Found		5576	ENSG00000114302.15	PRKAR2A	3	coagulation;metabolic process;regulation of biological process;response to stimulus	cytoplasm;cytosol;membrane	catalytic activity;enzyme regulator activity;nucleotide binding;protein binding	Pf00027, Pf02197	0.01	0.01	-6.64	-6.64	434280		326723		1		1		0.093	0	0	1
FALSE	High	IsMasterProtein	Q9H307	Pinin OS=Homo sapiens GN=PNN PE=1 SV=4	FALSE	0.005	3.248	2.37099	1	2	1	1	717	81.6	7.14	Peak Found	High	High	Peak Found	Dimethyl [K553]	5411		PNN	14	metabolic process;regulation of biological process	membrane;nucleus;spliceosomal complex	DNA binding;RNA binding;structural molecule activity	Pf04696, Pf04697	1.854	3.105	0.89	1.63	776476	1.4399e+06	628260	1.95044e+06	1	1	1	1	0.11	0	0	1
FALSE	High	IsMasterProtein	P10599	Thioredoxin OS=Homo sapiens GN=TXN PE=1 SV=3	FALSE	0.005	3.232	20.9524	2	2	2	1	105	11.7	4.92	Not Found	Not Found	Peak Found	High		7295	ENSG00000136810.12	TXN	9	cell communication;cell proliferation;cellular component movement;cellular homeostasis;metabolic process;regulation of biological process;response to stimulus;transport	cytoplasm;cytosol;extracellular;mitochondrion;nucleus	antioxidant activity;catalytic activity;protein binding;RNA binding	Pf00085, Pf00462, Pf13098, Pf13899, Pf13905		0.473		-1.08			4.75634e+06	2.24835e+06			1	1	0.931	0	1.9	2
FALSE	High	IsMasterProtein	Q9Y2I8-2	Isoform 2 of WD repeat-containing protein 37 OS=Homo sapiens GN=WDR37	FALSE	0.005	3.225	3.23232	1	1	1	1	495	54.8	7.23	Not Found	High	Not Found	Not Found		22884		WDR37	10	metabolic process		protein binding	Pf00400, Pf05103	100		6.64			687332				1			0.075	0	2.99	1
FALSE	High	IsMasterProtein	Q9HC35	Echinoderm microtubule-associated protein-like 4 OS=Homo sapiens GN=EML4 PE=1 SV=3	FALSE	0.005	3.174	3.0581	2	2	2	1	981	108.8	6.4	High	Not Found	High	Not Found	Dimethyl [K812]	27436	ENSG00000143924.18	EML4	2	cell organization and biogenesis	cytoplasm;cytoskeleton;membrane	protein binding	Pf00400, Pf03451	0.01		-6.64		98491.3				1				0.081	0	0	2
FALSE	High	IsMasterProtein	P39019	40S ribosomal protein S19 OS=Homo sapiens GN=RPS19 PE=1 SV=2	FALSE	0.005	3.137	13.7931	2	2	2	1	145	16.1	10.32	Not Found	Not Found	High	Peak Found	Dimethyl [K29; K38; K111]	6223	ENSG00000105372.6	RPS19	19	cell differentiation;cell organization and biogenesis;cellular component movement;metabolic process;regulation of biological process;response to stimulus;transport	cytoplasm;cytosol;membrane;nucleus;ribosome	protein binding;RNA binding;structural molecule activity	Pf01090		0.466		-1.1			1.31698e+07	6.13752e+06			2	2	0.468	0	0	2
FALSE	High	IsMasterProtein	P42704	Leucine-rich PPR motif-containing protein, mitochondrial OS=Homo sapiens GN=LRPPRC PE=1 SV=3	FALSE	0.005	3.105	1.29125	1	1	1	1	1394	157.8	6.13	High	Not Found	Not Found	Not Found		10128	ENSG00000138095.18	LRPPRC	2	cellular component movement;metabolic process;regulation of biological process;transport	chromosome;cytoplasm;cytoskeleton;membrane;mitochondrion;nucleus	catalytic activity;DNA binding;protein binding;RNA binding	Pf12854, Pf13041, Pf13812	0.01		-6.64		1.138e+06				1				0.023	0	0	1
FALSE	High	IsMasterProtein	P62891	60S ribosomal protein L39 OS=Homo sapiens GN=RPL39 PE=1 SV=2	FALSE	0.005	3.074	19.6078	1	1	1	1	51	6.4	12.56	Peak Found	High	Not Found	Not Found		6170; 285785	ENSG00000198918.7	RPL39; RPL39P3	X; 6	cell organization and biogenesis;defense response;metabolic process;response to stimulus;transport	cytosol;ribosome	RNA binding;structural molecule activity	Pf00832	0.411		-1.28		8.49216e+07	3.48697e+07			1	1			9	0	0	1
FALSE	High	IsMasterProtein	O95573	Long-chain-fatty-acid--CoA ligase 3 OS=Homo sapiens GN=ACSL3 PE=1 SV=3	FALSE	0.005	3.009	2.5	1	2	1	1	720	80.4	8.38	High	Not Found	High	Not Found	Dimethyl [K699]	2181	ENSG00000123983.13	ACSL3	2	cell organization and biogenesis;metabolic process;regulation of biological process;response to stimulus;transport	endoplasmic reticulum;Golgi;membrane;mitochondrion	catalytic activity;nucleotide binding;protein binding	Pf00501	0.01	0.01	-6.64	-6.64	284885		284801		1		1		0.059	0	0	1
FALSE	High	IsMasterProtein	Q9BRJ6	Uncharacterized protein C7orf50 OS=Homo sapiens GN=C7orf50 PE=1 SV=1	FALSE	0.005	3.003	17.0103	2	2	2	1	194	22.1	9.64	High	Peak Found	Peak Found	High		84310	ENSG00000146540.14	C7orf50	7			protein binding;RNA binding	Pf10180	0.923	0.922	-0.12	-0.12	619505	571585	741713	683957	1	1	1	1	0.52	0	0	2
FALSE	High	IsMasterProtein	P35232	Prohibitin OS=Homo sapiens GN=PHB PE=1 SV=1	FALSE	0.005	2.998	6.25	1	2	1	1	272	29.8	5.76	High	Not Found	High	Not Found		5245	ENSG00000167085.11	PHB	17	cell differentiation;cell organization and biogenesis;metabolic process;regulation of biological process;response to stimulus	cell surface;cytoplasm;endosome;membrane;mitochondrion;nucleus	DNA binding;protein binding	Pf01145	0.01	0.01	-6.64	-6.64	286269		287754		1		1		0.292	0	0	1
FALSE	High	IsMasterProtein	O00567	Nucleolar protein 56 OS=Homo sapiens GN=NOP56 PE=1 SV=4	FALSE	0.005	2.996	3.19865	1	1	1	1	594	66	9.19	Not Found	Not Found	Peak Found	High		10528	ENSG00000101361.16	NOP56	20	metabolic process	cytoplasm;membrane;nucleus	protein binding;RNA binding	Pf01798, Pf08060, Pf08156		2.041		1.03			863193	1.76217e+06			1	1	0.066	0	0	1
FALSE	High	IsMasterProtein	Q7Z2W4	Zinc finger CCCH-type antiviral protein 1 OS=Homo sapiens GN=ZC3HAV1 PE=1 SV=3	FALSE	0.005	2.992	4.32373	2	2	2	1	902	101.4	8.4	High	Peak Found	High	Not Found		56829	ENSG00000105939.12	ZC3HAV1	7	defense response;regulation of biological process;response to stimulus	cytoplasm;cytosol;endosome;nucleus;vacuole	catalytic activity;metal ion binding;protein binding;RNA binding	Pf00644	0.532	0.01	-0.91	-6.64	2.2178e+06	1.18005e+06	206899		1	1	1		0.073	0	0	2
FALSE	High	IsMasterProtein	Q14257-2	Isoform 2 of Reticulocalbin-2 OS=Homo sapiens GN=RCN2	FALSE	0.005	2.963	6.86567	1	1	1	1	335	39.1	4.45	Not Found	Not Found	Not Found	Not Found		5955	ENSG00000117906.13	RCN2	15		endoplasmic reticulum;organelle lumen	metal ion binding;protein binding	Pf13499													0.122	0	0	1
FALSE	High	IsMasterProtein	Q13595	Transformer-2 protein homolog alpha OS=Homo sapiens GN=TRA2A PE=1 SV=1	FALSE	0.005	2.952	10.6383	2	2	2	1	282	32.7	11.27	Not Found	High	Peak Found	High		29896	ENSG00000164548.10	TRA2A	7	metabolic process	nucleus	nucleotide binding;RNA binding	Pf00076, Pf13893, Pf14259	100	5.038	6.64	2.33		1.67422e+06	164232	827433		1	1	1	0.359	0	0	2
FALSE	High	IsMasterProtein	Q02543	60S ribosomal protein L18a OS=Homo sapiens GN=RPL18A PE=1 SV=2	FALSE	0.007	2.922	11.3636	2	3	2	1	176	20.7	10.71	High	Peak Found	High	Not Found		6142	ENSG00000105640.12	RPL18A	19	cell organization and biogenesis;metabolic process;response to stimulus;transport	cytosol;membrane;ribosome	protein binding;RNA binding;structural molecule activity	Pf01775	0.211	0.01	-2.24	-6.64	9.02581e+06	1.90643e+06	4.65858e+06		2	1	1		0.389	0	0	2
FALSE	High	IsMasterProtein	P49589-3	Isoform 3 of Cysteine--tRNA ligase, cytoplasmic OS=Homo sapiens GN=CARS	FALSE	0.007	2.897	1.44404	1	1	1	1	831	94.6	6.83	Peak Found	High	Not Found	Not Found		833	ENSG00000278191.4; ENSG00000110619.17	CARS	11; CHR_HSCHR11_1_CTG7	metabolic process	cytoplasm;cytosol	catalytic activity;metal ion binding;nucleotide binding;protein binding;RNA binding	Pf01406, Pf09334	0.416		-1.26		8.30925e+06	3.45962e+06			1	1			0.048	0	2.48	1
FALSE	High	IsMasterProtein	P20042	Eukaryotic translation initiation factor 2 subunit 2 OS=Homo sapiens GN=EIF2S2 PE=1 SV=2	FALSE	0.007	2.874	3.003	1	1	1	1	333	38.4	5.8	High	Peak Found	Not Found	Not Found		8894	ENSG00000125977.6	EIF2S2	20	cell proliferation;metabolic process;transport	cytoplasm;cytosol;nucleus	metal ion binding;protein binding;RNA binding	Pf01873, Pf04147	0.249		-2		2.55979e+06	637978			1	1			0.11	0	1.9	1
FALSE	High	IsMasterProtein	Q13435	Splicing factor 3B subunit 2 OS=Homo sapiens GN=SF3B2 PE=1 SV=2	FALSE	0.007	2.771	2.7933	2	2	2	1	895	100.2	5.67	High	Peak Found	High	Peak Found	Dimethyl [K627]	10992	ENSG00000087365.15	SF3B2	11	metabolic process	nucleus;spliceosomal complex	protein binding;RNA binding	Pf02037, Pf04037, Pf04046	0.474	0.64	-1.08	-0.64	2.09927e+06	995959	1.55918e+06	997558	1	1	1	1	0.093	0	0	2
FALSE	High	IsMasterProtein	O95831	Apoptosis-inducing factor 1, mitochondrial OS=Homo sapiens GN=AIFM1 PE=1 SV=1	FALSE	0.007	2.769	1.95759	1	1	1	1	613	66.9	8.95	High	Peak Found	Not Found	Not Found	Dimethyl [K189]	9131	ENSG00000156709.13	AIFM1	X	cell death;cell differentiation;cell organization and biogenesis;cellular homeostasis;metabolic process;regulation of biological process;response to stimulus	cytoplasm;cytosol;membrane;mitochondrion;nucleus	catalytic activity;DNA binding;nucleotide binding;protein binding	Pf00070, Pf07992, Pf14721, Pf14962	0.254		-1.97		3.37798e+06	859325			1	1			0.072	0	0	1
FALSE	High	IsMasterProtein	Q8N5Y2	Male-specific lethal 3 homolog OS=Homo sapiens GN=MSL3 PE=1 SV=1	FALSE	0.007	2.76	3.07102	1	1	1	1	521	59.8	8.21	Not Found	Not Found	Not Found	High		10943	ENSG00000005302.17	MSL3	X	cell organization and biogenesis;metabolic process;regulation of biological process	nucleus	DNA binding;protein binding	Pf05712, Pf11717		100		6.64				290024				1	0.062	0	0	1
FALSE	High	IsMasterProtein	P82909	28S ribosomal protein S36, mitochondrial OS=Homo sapiens GN=MRPS36 PE=1 SV=2	FALSE	0.007	2.754	17.4757	1	1	1	1	103	11.5	9.99	Not Found	High	Not Found	Not Found		92259	ENSG00000278461.4; ENSG00000134056.11	MRPS36	5; CHR_HSCHR5_2_CTG1_1	cell organization and biogenesis;metabolic process	membrane;mitochondrion;ribosome	catalytic activity;structural molecule activity		100		6.64			1.62799e+06				1			0.468	0	0	1
FALSE	High	IsMasterProtein	P48047	ATP synthase subunit O, mitochondrial OS=Homo sapiens GN=ATP5O PE=1 SV=1	FALSE	0.007	2.751	7.98122	1	2	1	1	213	23.3	9.96	High	Peak Found	Not Found	Not Found		539	ENSG00000241837.6	ATP5O	21	metabolic process;transport	membrane;mitochondrion;nucleus	catalytic activity;protein binding;transporter activity	Pf00213													0.179	0	0	1
FALSE	High	IsMasterProtein	P14868	Aspartate--tRNA ligase, cytoplasmic OS=Homo sapiens GN=DARS PE=1 SV=2	FALSE	0.007	2.697	5.98802	2	2	2	1	501	57.1	6.55	High	Peak Found	High	Not Found		1615	ENSG00000115866.10	DARS	2	cell organization and biogenesis;metabolic process	cytoplasm;cytosol;membrane	catalytic activity;nucleotide binding;protein binding;RNA binding	Pf00152, Pf01336	0.309		-1.69		4.0476e+06	1.25138e+06			1	1			0.122	0	0	2
FALSE	High	IsMasterProtein	Q9NS69	Mitochondrial import receptor subunit TOM22 homolog OS=Homo sapiens GN=TOMM22 PE=1 SV=3	FALSE	0.007	2.677	17.6056	1	1	1	1	142	15.5	4.34	Not Found	Not Found	High	Not Found	Dimethyl [K141]	56993	ENSG00000100216.5	TOMM22	22	cell communication;cell organization and biogenesis;metabolic process;response to stimulus;transport	membrane;mitochondrion	protein binding;transporter activity			0.01		-6.64			511628				1		0.389	0	0	1
FALSE	High	IsMasterProtein	P52298	Nuclear cap-binding protein subunit 2 OS=Homo sapiens GN=NCBP2 PE=1 SV=1	FALSE	0.007	2.676	7.05128	1	1	1	1	156	18	8.21	Not Found	Not Found	Not Found	Not Found		22916	ENSG00000114503.10	NCBP2	3	metabolic process;regulation of biological process;response to stimulus;transport	cytoplasm;cytosol;nucleus	nucleotide binding;protein binding;RNA binding	Pf00076, Pf13893, Pf14259													0.233	0	0	1
FALSE	High	IsMasterProtein	P53618	Coatomer subunit beta OS=Homo sapiens GN=COPB1 PE=1 SV=3	FALSE	0.007	2.66	1.88877	1	1	1	1	953	107.1	6.05	Not Found	Not Found	Not Found	Not Found	Dimethyl [K679]	1315	ENSG00000129083.12	COPB1	11	transport	cytoplasm;cytosol;Golgi;membrane	protein binding;structural molecule activity	Pf01602, Pf07718, Pf14806													0.041	0	0	1
FALSE	High	IsMasterProtein	P11182	Lipoamide acyltransferase component of branched-chain alpha-keto acid dehydrogenase complex, mitochondrial OS=Homo sapiens GN=DBT PE=1 SV=3	FALSE	0.007	2.657	2.90456	1	1	1	1	482	53.5	8.51	Peak Found	High	Not Found	Not Found		1629		DBT	1	metabolic process	mitochondrion;organelle lumen	catalytic activity;protein binding	Pf00198, Pf00364, Pf02817	0.838		-0.25		2.55357e+06	2.14106e+06			1	1			0.083	0	1.62	1
FALSE	High	IsMasterProtein	Q16795	NADH dehydrogenase [ubiquinone] 1 alpha subcomplex subunit 9, mitochondrial OS=Homo sapiens GN=NDUFA9 PE=1 SV=2	FALSE	0.007	2.642	2.65252	1	1	1	1	377	42.5	9.8	High	Not Found	Not Found	Not Found	Dimethyl [K147]	4704	ENSG00000139180.10	NDUFA9	12	cell organization and biogenesis;metabolic process;transport	membrane;mitochondrion;nucleus;organelle lumen	catalytic activity;protein binding	Pf01073, Pf01370, Pf05368	0.01		-6.64		431803				1				0.086	0	0	1
FALSE	High	IsMasterProtein	Q6Y7W6-3	Isoform 2 of PERQ amino acid-rich with GYF domain-containing protein 2 OS=Homo sapiens GN=GIGYF2	FALSE	0.007	2.64	0.833333	1	2	1	1	1320	152.3	5.63	Not Found	Not Found	High	Not Found		26058	ENSG00000204120.14	GIGYF2	2	cell differentiation;metabolic process;regulation of biological process;response to stimulus	cytosol;endoplasmic reticulum;endosome;Golgi;membrane	protein binding;RNA binding	Pf02213		0.01		-6.64			1.20477e+06				1		0.038	0	1.89	1
FALSE	High	IsMasterProtein	Q9BW66-3	Isoform 3 of Cyclin-dependent kinase 2-interacting protein OS=Homo sapiens GN=CINP	FALSE	0.007	2.612	14.978	2	2	2	1	227	26	6.52	Not Found	Not Found	Not Found	High		51550	ENSG00000100865.14	CINP	14	cell division;metabolic process;response to stimulus	nucleus	protein binding			100		6.64				3.44286e+06				2	0.359	0	0	2
FALSE	High	IsMasterProtein	P0CW18	Serine protease 56 OS=Homo sapiens GN=PRSS56 PE=1 SV=1	FALSE	0.007	2.526	6.13599	2	2	2	1	603	64.6	8.76	High	Not Found	High	Not Found	Dimethyl [K318]	646960	ENSG00000237412.6	PRSS56	2	metabolic process	endoplasmic reticulum	catalytic activity	Pf00089, Pf09342, Pf13365	0.01	0.01	-6.64	-6.64	352029		977720		1		1		0.16	0	0	2
FALSE	High	IsMasterProtein	Q9NQX3-2	Isoform 2 of Gephyrin OS=Homo sapiens GN=GPHN	FALSE	0.007	2.506	2.60078	1	2	1	1	769	83.4	5.58	Not Found	Not Found	High	Not Found		10243	ENSG00000171723.15	GPHN	14	cell organization and biogenesis;metabolic process	cytoplasm;cytoskeleton;membrane	catalytic activity;metal ion binding;nucleotide binding;protein binding	Pf00994, Pf03453, Pf03454		0.01		-6.64			538669				1		0.05	0	0	1
FALSE	High	IsMasterProtein	Q96FS4	Signal-induced proliferation-associated protein 1 OS=Homo sapiens GN=SIPA1 PE=1 SV=1	FALSE	0.007	2.487	1.91939	1	1	1	1	1042	112.1	6.6	Not Found	High	Not Found	Not Found		6494	ENSG00000213445.9	SIPA1	11	cell communication;cell organization and biogenesis;cell proliferation;regulation of biological process;response to stimulus	cytoplasm;cytosol;membrane;nucleus	catalytic activity;enzyme regulator activity;motor activity;protein binding	Pf00595, Pf01576, Pf02145, Pf03980, Pf09755, Pf12795, Pf13949	100		6.64			1.21432e+06				1			0.042	0	0	1
FALSE	High	IsMasterProtein	P57678	Gem-associated protein 4 OS=Homo sapiens GN=GEMIN4 PE=1 SV=2	FALSE	0.007	2.464	2.74102	2	2	2	1	1058	120	6.04	High	Peak Found	Peak Found	High		50628	ENSG00000179409.10	GEMIN4	17	cell organization and biogenesis;metabolic process;transport	cytoplasm;cytosol;membrane;nucleus	protein binding		1.345	1.435	0.43	0.52	1.37428e+06	1.84823e+06	766697	1.10053e+06	1	1	1	1	0.077	0	0	2
FALSE	High	IsMasterProtein	Q9Y5Y2	Cytosolic Fe-S cluster assembly factor NUBP2 OS=Homo sapiens GN=NUBP2 PE=1 SV=1	FALSE	0.007	2.451	9.9631	1	1	1	1	271	28.8	5.83	High	Not Found	Not Found	Not Found	Dimethyl [K261]	10101	ENSG00000095906.16	NUBP2	16	cell organization and biogenesis;metabolic process	cytoplasm;cytoskeleton;nucleus	metal ion binding;nucleotide binding;protein binding	Pf00142, Pf01656, Pf02374, Pf03308, Pf08433, Pf09140, Pf10609, Pf13481, Pf13614													0.194	0	0	1
FALSE	High	IsMasterProtein	P04075-2	Isoform 2 of Fructose-bisphosphate aldolase A OS=Homo sapiens GN=ALDOA	FALSE	0.007	2.446	8.85167	2	2	2	1	418	45.2	8.25	High	High	Not Found	Not Found	Dimethyl [K96]	226	ENSG00000149925.17	ALDOA	16	cell organization and biogenesis;cellular homeostasis;metabolic process;regulation of biological process;transport	cytoskeleton;cytosol;extracellular;membrane;nucleus;organelle lumen	catalytic activity;protein binding;RNA binding	Pf00274	0.583		-0.78		5.49423e+06	3.20185e+06			2	2			0.212	0	0	2
FALSE	High	IsMasterProtein	Q15773	Myeloid leukemia factor 2 OS=Homo sapiens GN=MLF2 PE=1 SV=1	FALSE	0.007	2.438	7.25806	1	1	1	1	248	28.1	6.9	High	Not Found	Not Found	Not Found		8079	ENSG00000089693.10	MLF2	12	defense response;regulation of biological process;response to stimulus	cytoplasm;membrane;nucleus	DNA binding;protein binding	Pf10248	0.01		-6.64		294230				1				0.212	0	0	1
FALSE	High	IsMasterProtein	Q9UNY4	Transcription termination factor 2 OS=Homo sapiens GN=TTF2 PE=1 SV=2	FALSE	0.007	2.43	1.0327	1	1	1	1	1162	129.5	8.37	High	Not Found	Not Found	Not Found		8458	ENSG00000116830.11	TTF2	1	metabolic process;regulation of biological process	cytoplasm;cytosol;nucleus;spliceosomal complex	catalytic activity;DNA binding;metal ion binding;nucleotide binding;protein binding	Pf00176, Pf00271, Pf06839	0.01		-6.64		820507				1				0.029	0	0	1
FALSE	High	IsMasterProtein	CON_P00735	SWISS-PROT P00735 (Bos taurus) Prothrombin precursor (Fragment)	TRUE	0.007	2.41	1.44	1	1	1	1	625	70.5	6.33	Not Found	Not Found	High	Peak Found											0.822		-0.28			3.7211e+06	3.05715e+06			1	1	0.062	0	0	1
FALSE	High	IsMasterProtein	P55209	Nucleosome assembly protein 1-like 1 OS=Homo sapiens GN=NAP1L1 PE=1 SV=1	FALSE	0.007	2.393	2.8133	1	1	1	1	391	45.3	4.46	High	Peak Found	Not Found	Not Found	Dimethyl [K176]	4673	ENSG00000187109.13	NAP1L1	12	cell organization and biogenesis;metabolic process;regulation of biological process	membrane;nucleus	protein binding;RNA binding	Pf00956	0.181		-2.47		869355	157395			1	1			0.166	0	0	1
FALSE	High	IsMasterProtein	A4D1P6	WD repeat-containing protein 91 OS=Homo sapiens GN=WDR91 PE=1 SV=2	FALSE	0.007	2.379	2.27577	1	1	1	1	747	83.3	6.58	Not Found	Not Found	High	Not Found		29062	ENSG00000105875.13	WDR91	7			protein binding	Pf00400													0.047	0	0	1
FALSE	High	IsMasterProtein	Q6WCQ1-2	Isoform 2 of Myosin phosphatase Rho-interacting protein OS=Homo sapiens GN=MPRIP	FALSE	0.007	2.343	1.7341	1	1	1	1	1038	118	6.39	Peak Found	High	Not Found	Not Found		23164	ENSG00000133030.20	MPRIP	17		cytoskeleton;cytosol	protein binding	Pf00169	2.65		1.41		1.5071e+06	3.99429e+06			1	1			0.038	0	0	1
FALSE	High	IsMasterProtein	P14635	G2/mitotic-specific cyclin-B1 OS=Homo sapiens GN=CCNB1 PE=1 SV=1	FALSE	0.008	2.289	3.9261	1	1	1	1	433	48.3	7.47	Not Found	Not Found	Peak Found	High		891	ENSG00000134057.14	CCNB1	5	cell division;cell organization and biogenesis;metabolic process;regulation of biological process;response to stimulus	cytoplasm;cytoskeleton;cytosol;membrane;nucleus	catalytic activity;protein binding	Pf00134, Pf02984		1.447		0.53			747064	1.08111e+06			1	1	0.11	0	0	1
FALSE	High	IsMasterProtein	P13637-3	Isoform 3 of Sodium/potassium-transporting ATPase subunit alpha-3 OS=Homo sapiens GN=ATP1A3	FALSE	0.008	2.278	1.75439	1	1	1	1	1026	113	5.38	Not Found	Not Found	High	Peak Found		478	ENSG00000105409.16	ATP1A3	19	cell communication;cellular homeostasis;regulation of biological process;response to stimulus;transport	endoplasmic reticulum;Golgi;membrane;nucleus	catalytic activity;metal ion binding;nucleotide binding;protein binding;transporter activity	Pf00122, Pf00689, Pf00690, Pf00702, Pf08282, Pf12710, Pf13246		0.065		-3.94			3.52219e+06	228810			1	1	0.044	0	0	1
FALSE	High	IsMasterProtein	Q03135	Caveolin-1 OS=Homo sapiens GN=CAV1 PE=1 SV=4	FALSE	0.008	2.27	7.86517	1	1	1	1	178	20.5	6.02	High	Not Found	Not Found	Not Found		857	ENSG00000105974.11	CAV1	7	cell communication;cell differentiation;cell organization and biogenesis;cellular component movement;cellular homeostasis;metabolic process;regulation of biological process;response to stimulus;transport	endoplasmic reticulum;endosome;Golgi;membrane	enzyme regulator activity;protein binding;structural molecule activity	Pf01146													0.212	0	0	1
FALSE	High	IsMasterProtein	Q9UHD8	Septin-9 OS=Homo sapiens GN=SEPT9 PE=1 SV=2	FALSE	0.008	2.269	3.07167	1	2	1	1	586	65.4	8.97	Peak Found	High	Peak Found	High		10801	ENSG00000184640.17	2017-09-09	17	cell division;cell organization and biogenesis;regulation of biological process	cytoplasm;cytoskeleton	catalytic activity;nucleotide binding;protein binding	Pf00735, Pf01926, Pf03193, Pf04548	1.541	2.68	0.62	1.42	424303	654043	134560	360650	1	1	1	1	0.059	0	0	1
FALSE	High	IsMasterProtein	P35606	Coatomer subunit beta' OS=Homo sapiens GN=COPB2 PE=1 SV=2	FALSE	0.008	2.258	1.10375	1	1	1	1	906	102.4	5.27	Not Found	Not Found	High	Not Found	Dimethyl [K812]	9276	ENSG00000184432.9	COPB2	3	transport	cytoplasm;cytosol;Golgi;membrane	protein binding;structural molecule activity	Pf00400, Pf04053		0.01		-6.64			1754541				1		0.042	0	0	1
FALSE	High	IsMasterProtein	Q9H568	Actin-like protein 8 OS=Homo sapiens GN=ACTL8 PE=1 SV=1	FALSE	0.008	2.232	5.7377	1	1	1	1	366	41.3	6.14	Not Found	Not Found	High	Not Found		81569	ENSG00000117148.7	ACTL8	1	cell differentiation	cytoplasm;cytoskeleton	protein binding	Pf00022		0.01		-6.64			527198				1		0.129	0	0	1
FALSE	High	IsMasterProtein	Q92522	Histone H1x OS=Homo sapiens GN=H1FX PE=1 SV=1	FALSE	0.008	2.229	5.6338	1	1	1	1	213	22.5	10.76	High	Peak Found	Not Found	Not Found	Dimethyl [K106]	8971	ENSG00000184897.5	H1FX	3	cell organization and biogenesis	chromosome;nucleus	DNA binding;protein binding;RNA binding	Pf00538	0.199		-2.33		1.62383e+07	3.23306e+06			1	1			0.179	0	0	1
FALSE	High	IsMasterProtein	P33176	Kinesin-1 heavy chain OS=Homo sapiens GN=KIF5B PE=1 SV=1	FALSE	0.008	2.222	2.28453	1	1	1	1	963	109.6	6.51	Not Found	Not Found	High	Not Found		3799	ENSG00000170759.10	KIF5B	10	cell differentiation;cell organization and biogenesis;cellular component movement;metabolic process;regulation of biological process;transport	cytoplasm;cytoskeleton;cytosol;membrane	catalytic activity;motor activity;nucleotide binding;protein binding	Pf00225, Pf01576, Pf02463, Pf03999, Pf04111, Pf04156, Pf05483, Pf05557, Pf05622, Pf06160, Pf07111, Pf07888, Pf10174, Pf12128, Pf13514, Pf13851, Pf14915		0.01		-6.64			332363				1		0.037	0	0	1
FALSE	High	IsMasterProtein	P53985	Monocarboxylate transporter 1 OS=Homo sapiens GN=SLC16A1 PE=1 SV=3	FALSE	0.008	2.212	2.6	1	2	1	1	500	53.9	8.66	High	Not Found	High	Peak Found	Dimethyl [K224]	6566	ENSG00000281917.2; ENSG00000155380.11	SLC16A1	1; CHR_HG2104_PATCH	cell organization and biogenesis;cellular component movement;metabolic process;regulation of biological process;response to stimulus;transport	membrane;mitochondrion	protein binding;transporter activity	Pf00083, Pf07690, Pf12832	0.01	0.032	-6.64	-4.99	912349		1.71474e+06	54058.1	1		1	1	0.145	0	0	1
FALSE	High	IsMasterProtein	E9PRG8	Uncharacterized protein C11orf98 OS=Homo sapiens GN=C11orf98 PE=4 SV=1	FALSE	0.008	2.187	10.6557	1	1	1	1	122	13.8	11.69	High	Peak Found	Not Found	Not Found		102288414	ENSG00000278615.4	LOC102288414; C11orf98	11					0.312		-1.68		5.87876e+06	1.83491e+06			1	1			0.585	0	0	1
FALSE	High	IsMasterProtein	Q9Y5S9	RNA-binding protein 8A OS=Homo sapiens GN=RBM8A PE=1 SV=1	FALSE	0.008	2.178	6.32184	1	1	1	1	174	19.9	5.72	Peak Found	High	Not Found	Not Found		9939	ENSG00000265241.6	RBM8A; LOC101060541	1	metabolic process;regulation of biological process;transport	cytoplasm;cytosol;nucleus;spliceosomal complex	nucleotide binding;protein binding;RNA binding	Pf00076, Pf08777, Pf13893, Pf14259	0.65		-0.62		5.2239e+06	3.3943e+06			1	1			0.334	0	0	1
FALSE	Medium	IsMasterProtein	Q9UG63-2	Isoform 2 of ATP-binding cassette sub-family F member 2 OS=Homo sapiens GN=ABCF2	FALSE	0.01	2.153	1.57729	1	1	1	1	634	72.4	7.49	High	Not Found	Not Found	Not Found	Dimethyl [K58]	10061	ENSG00000033050.7	ABCF2	7	transport	membrane;mitochondrion	catalytic activity;nucleotide binding;transporter activity	Pf00005, Pf12848													0.062	0	0	1
FALSE	Medium	IsMasterProtein	P55072	Transitional endoplasmic reticulum ATPase OS=Homo sapiens GN=VCP PE=1 SV=4	FALSE	0.01	2.151	2.10918	1	1	1	1	806	89.3	5.26	Not Found	Not Found	High	Not Found	Dimethyl [K312]	7415	ENSG00000165280.15	VCP	9	cell organization and biogenesis;metabolic process;regulation of biological process;response to stimulus;transport	cytoplasm;cytosol;endoplasmic reticulum;extracellular;membrane;nucleus;organelle lumen;proteasome	catalytic activity;enzyme regulator activity;nucleotide binding;protein binding;RNA binding	Pf00004, Pf00910, Pf01057, Pf01078, Pf02359, Pf02933, Pf05496, Pf05673, Pf06068, Pf07724, Pf07726, Pf07728, Pf09336, Pf13191, Pf13207, Pf13401		0.01		-6.64			142100				1		0.049	0	0	1
FALSE	Medium	IsMasterProtein	O76021	Ribosomal L1 domain-containing protein 1 OS=Homo sapiens GN=RSL1D1 PE=1 SV=3	FALSE	0.01	2.14	4.08163	1	1	1	1	490	54.9	10.13	Not Found	Not Found	Peak Found	High		26156	ENSG00000171490.12	RSL1D1	16	cell differentiation;metabolic process;regulation of biological process	membrane;nucleus	protein binding;RNA binding	Pf06030, Pf11797		1.243		0.31			1.15983e+06	1.44162e+06			1	1	0.093	0	0	1
FALSE	Medium	IsMasterProtein	Q99848	Probable rRNA-processing protein EBP2 OS=Homo sapiens GN=EBNA1BP2 PE=1 SV=2	FALSE	0.01	2.137	3.26797	1	1	1	1	306	34.8	10.1	High	Not Found	Not Found	Not Found		10969	ENSG00000117395.12	EBNA1BP2	1	metabolic process	nucleus	protein binding;RNA binding	Pf05890	0.01		-6.64		726808				1				0.136	0	0	1
FALSE	Medium	IsMasterProtein	Q9H0S4	Probable ATP-dependent RNA helicase DDX47 OS=Homo sapiens GN=DDX47 PE=1 SV=1	FALSE	0.01	2.136	2.41758	1	1	1	1	455	50.6	9.1	Not Found	Not Found	High	Not Found		51202	ENSG00000213782.7	DDX47	12	cell death;metabolic process;regulation of biological process;response to stimulus	membrane;nucleus	catalytic activity;nucleotide binding;protein binding;RNA binding	Pf00270, Pf00271													0.093	0	0	1
FALSE	Medium	IsMasterProtein	Q9NWV8	BRISC and BRCA1-A complex member 1 OS=Homo sapiens GN=BABAM1 PE=1 SV=1	FALSE	0.01	2.136	3.64742	1	1	1	1	329	36.5	4.64	High	Not Found	Not Found	Not Found	Dimethyl [K274]	29086	ENSG00000105393.15	BABAM1	19	cell division;cell organization and biogenesis;metabolic process;regulation of biological process;response to stimulus	cytoplasm;cytosol;nucleus	protein binding		0.01		-6.64		712907				1				0.129	0	0	1
FALSE	Medium	IsMasterProtein	P08237-3	Isoform 3 of ATP-dependent 6-phosphofructokinase, muscle type OS=Homo sapiens GN=PFKM	FALSE	0.01	2.106	1.2926	1	1	1	1	851	93.2	7.97	High	Not Found	Not Found	Not Found	Dimethyl [K798]	5213	ENSG00000152556.15	PFKM	12	cell organization and biogenesis;cellular homeostasis;metabolic process;regulation of biological process	cytoplasm;cytosol;membrane	catalytic activity;metal ion binding;nucleotide binding;protein binding	Pf00365	0.01		-6.64		763780				1				0.048	0	0	1
FALSE	Medium	IsMasterProtein	Q9BWM7	Sideroflexin-3 OS=Homo sapiens GN=SFXN3 PE=1 SV=2	FALSE	0.01	2.104	4	1	2	1	1	325	36	9.09	High	Not Found	High	Peak Found		81855	ENSG00000107819.13	SFXN3	10	transport	membrane;mitochondrion	transporter activity	Pf03820	0.01	0.074	-6.64	-3.76	1.60839e+06		2.72983e+06	201726	1		1	1	0.116	0	0	1
FALSE	Medium	IsMasterProtein	Q14258	E3 ubiquitin/ISG15 ligase TRIM25 OS=Homo sapiens GN=TRIM25 PE=1 SV=2	FALSE	0.01	2.099	2.85714	1	1	1	1	630	70.9	8.09	Not Found	Not Found	High	Peak Found		7706	ENSG00000121060.16	TRIM25	17	defense response;metabolic process;regulation of biological process;response to stimulus	cytoplasm;cytosol	catalytic activity;metal ion binding;motor activity;protein binding;RNA binding	Pf00097, Pf00622, Pf01576, Pf13445, Pf13639, Pf13765, Pf13920, Pf13923, Pf14634, Pf15227		0.309		-1.69			557417	172324			1	1	0.059	0	0	1
FALSE	Medium	IsMasterProtein	CON_Q0V8M9	TREMBL Q0V8M9;Q9TRI0 (Bos taurus) similar to inter-alpha (globulin) inhibitor H3 isoform 2	TRUE	0.01	2.098	1.57127	1	1	1	1	891	99.5	5.96	Peak Found	High	Not Found	Not Found										4.174		2.06		884139	3.69013e+06			1	1			0.05	0	0	1
FALSE	Medium	IsMasterProtein	P49458	Signal recognition particle 9 kDa protein OS=Homo sapiens GN=SRP9 PE=1 SV=2	FALSE	0.01	2.094	12.7907	1	1	1	1	86	10.1	7.97	Peak Found	High	Not Found	Not Found		6726; 653226	ENSG00000143742.12	SRP9; SRP9P1	1; 10	cell organization and biogenesis;regulation of biological process;transport	cytoplasm;cytosol	protein binding;RNA binding	Pf05486	0.422		-1.25		1.72464e+07	7.27077e+06			1	1			0.389	0	0	1
FALSE	Medium	IsMasterProtein	P47914	60S ribosomal protein L29 OS=Homo sapiens GN=RPL29 PE=1 SV=2	FALSE	0.01	2.089	9.43396	1	1	1	1	159	17.7	11.66	Not Found	Not Found	High	Peak Found	Dimethyl [K149]	6159	ENSG00000162244.10	RPL29	3	cell organization and biogenesis;metabolic process;transport	cytosol;membrane;ribosome	protein binding;RNA binding;structural molecule activity	Pf01779		1.052		0.07			2.06682e+06	2.17504e+06			1	1	0.468	0	0	1
FALSE	Medium	IsMasterProtein	Q9H4A3-7	Isoform 6 of Serine/threonine-protein kinase WNK1 OS=Homo sapiens GN=WNK1	FALSE	0.01	2.075	0.494176	1	1	1	1	2833	299.5	6.48	High	Not Found	Not Found	Not Found	Dimethyl [K365]	65125	ENSG00000060237.16	WNK1	12	metabolic process;regulation of biological process;response to stimulus;transport	cytoplasm;cytosol;membrane	catalytic activity;enzyme regulator activity;metal ion binding;nucleotide binding;protein binding	Pf00069, Pf07714, Pf12202	0.01		-6.64		458594				1				0.029	0	0	1
FALSE	Medium	IsMasterProtein	P04114	Apolipoprotein B-100 OS=Homo sapiens GN=APOB PE=1 SV=2	TRUE	0.01	2.056	0.262985	1	1	1	1	4563	515.3	7.05	Not Found	Not Found	High	Peak Found	Dimethyl [K707]	338		APOB	2	cell organization and biogenesis;cellular component movement;metabolic process;regulation of biological process;response to stimulus;transport	cytoplasm;cytosol;endoplasmic reticulum;endosome;extracellular;membrane;organelle lumen	protein binding;transporter activity	Pf01347, Pf04286, Pf06448, Pf09172, Pf12491		0.613		-0.71			1.49723e+06	918448			1	1	0.008	0	0	1
FALSE	Medium	IsMasterProtein	O15234	Protein CASC3 OS=Homo sapiens GN=CASC3 PE=1 SV=2	FALSE	0.01	2.001	2.56046	1	1	1	1	703	76.2	6.48	High	Not Found	Not Found	Not Found	Dimethyl [K691]	22794	ENSG00000108349.16	CASC3	17	metabolic process;regulation of biological process;transport	cytoplasm;cytosol;membrane;nucleus	protein binding;RNA binding	Pf09405	0.01		-6.64		814932				1				0.075	0	0	1
FALSE	Medium	IsMasterProtein	CON_ENSEMBL	ENSBTAP00000037665 (Bos taurus) similar to Pregnancy zone protein, partial	TRUE	0.01	2	1.55709	1	1	1	1	578	65.2	7.01	Not Found	High	Not Found	Not Found										100		6.64			2.01388e+06				1			0.075	0	0	1
FALSE	Medium	IsMasterProtein	P11310-2	Isoform 2 of Medium-chain specific acyl-CoA dehydrogenase, mitochondrial OS=Homo sapiens GN=ACADM	FALSE	0.01	1.988	2.82353	1	1	1	1	425	47	8.31	High	Not Found	Not Found	Not Found	Dimethyl [K275]	34	ENSG00000117054.13	ACADM	1	metabolic process	mitochondrion;nucleus;organelle lumen	catalytic activity;nucleotide binding;protein binding	Pf00441, Pf02770, Pf02771, Pf08028, Pf11794	0.01		-6.64		689973				1				0.105	0	0	1
FALSE	Medium	IsMasterProtein	P35222	Catenin beta-1 OS=Homo sapiens GN=CTNNB1 PE=1 SV=1	FALSE	0.01	1.986	2.30474	1	1	1	1	781	85.4	5.86	High	Not Found	Not Found	Not Found		1499	ENSG00000168036.16	CTNNB1	3	cell communication;cell differentiation;cell organization and biogenesis;cell proliferation;cellular component movement;metabolic process;regulation of biological process;response to stimulus;transport	cytoplasm;cytoskeleton;cytosol;membrane;nucleus	DNA binding;protein binding;signal transducer activity	Pf00514	0.01		-6.64		746707				1				0.053	0	0	1
FALSE	Medium	IsMasterProtein	P11586	C-1-tetrahydrofolate synthase, cytoplasmic OS=Homo sapiens GN=MTHFD1 PE=1 SV=3	FALSE	0.01	1.976	1.71123	1	2	1	1	935	101.5	7.3	High	Peak Found	High	Not Found	Dimethyl [K848]	4522		MTHFD1	14	metabolic process	cytoplasm;cytosol;membrane;mitochondrion	catalytic activity;nucleotide binding;protein binding	Pf00763, Pf01268, Pf02882													0.039	0	0	1
FALSE	Medium	IsMasterProtein	Q14254	Flotillin-2 OS=Homo sapiens GN=FLOT2 PE=1 SV=2	FALSE	0.01	1.965	4.43925	1	1	1	1	428	47	5.25	Not Found	Not Found	Not Found	Not Found	Dimethyl [K416]	2319	ENSG00000132589.15	FLOT2	17	cell organization and biogenesis;regulation of biological process	cytoskeleton;endosome;membrane	protein binding	Pf01145													0	0	0	1
FALSE	Medium	IsMasterProtein	O60884	DnaJ homolog subfamily A member 2 OS=Homo sapiens GN=DNAJA2 PE=1 SV=1	FALSE	0.012	1.947	2.42718	1	2	1	1	412	45.7	6.48	High	Not Found	High	Not Found	Dimethyl [K131]	10294	ENSG00000069345.11	DNAJA2	16	metabolic process;regulation of biological process;response to stimulus	cytosol;membrane	enzyme regulator activity;metal ion binding;nucleotide binding;protein binding	Pf00226, Pf00684, Pf01556	0.01	0.01	-6.64	-6.64	5.6373e+06		3793532		1		1		0.101	0	0	1
FALSE	Medium	IsMasterProtein	O75947	ATP synthase subunit d, mitochondrial OS=Homo sapiens GN=ATP5H PE=1 SV=3	FALSE	0.015	1.937	13.0435	1	1	1	1	161	18.5	5.3	High	Peak Found	Not Found	Not Found	Dimethyl [K144]	10476	ENSG00000167863.11	ATP5H	17	metabolic process;transport	cytosol;membrane;mitochondrion	catalytic activity;transporter activity	Pf05873	0.322		-1.63		813941	262472			1	1			0.233	0	0	1
FALSE	Medium	IsMasterProtein	P60174	Triosephosphate isomerase OS=Homo sapiens GN=TPI1 PE=1 SV=3	FALSE	0.015	1.924	5.24476	1	1	1	1	286	30.8	5.92	High	Peak Found	Not Found	Not Found	Dimethyl [K212]	7167	ENSG00000111669.14	TPI1	12	development;metabolic process	cytosol;nucleus	catalytic activity;protein binding	Pf00121	0.586		-0.77		844177	495022			1	1			0.129	0	0	1
FALSE	Medium	IsMasterProtein	Q92598-4	Isoform 4 of Heat shock protein 105 kDa OS=Homo sapiens GN=HSPH1	FALSE	0.015	1.917	2.09302	1	1	1	1	860	97.4	5.72	Not Found	Not Found	High	Peak Found	Dimethyl [K773]	10808	ENSG00000120694.19	HSPH1	13	metabolic process;regulation of biological process;response to stimulus;transport	cytoplasm;cytosol;extracellular;organelle lumen	enzyme regulator activity;nucleotide binding;protein binding	Pf00012		0.425		-1.23			586776	249527			1	1	0.041	0	0	1
FALSE	Medium	IsMasterProtein	Q8WUM0	Nuclear pore complex protein Nup133 OS=Homo sapiens GN=NUP133 PE=1 SV=2	FALSE	0.017	1.881	1.38408	1	1	1	1	1156	128.9	5.1	Not Found	Not Found	High	Not Found	Dimethyl [K1016]	55746	ENSG00000069248.11	NUP133	1	cell differentiation;cell organization and biogenesis;metabolic process;regulation of biological process;transport	chromosome;cytosol;membrane;nucleus	protein binding;structural molecule activity;transporter activity	Pf03177, Pf08801		0.01		-6.64			781341				1		0.036	0	0	1
FALSE	Medium	IsMasterProtein	Q6VY07-2	Isoform 2 of Phosphofurin acidic cluster sorting protein 1 OS=Homo sapiens GN=PACS1	FALSE	0.02	1.835	1.4881	1	1	1	1	1008	109.3	7.36	Not Found	High	Not Found	Not Found		55690		PACS1	11	cell organization and biogenesis;regulation of biological process;transport	cytosol	protein binding	Pf10254	100		6.64			2159689				1			0.053	0	0	1
FALSE	Medium	IsMasterProtein	P63241-2	Isoform 2 of Eukaryotic translation initiation factor 5A-1 OS=Homo sapiens GN=EIF5A	FALSE	0.02	1.835	6.52174	1	2	1	1	184	20.2	7.01	High	Peak Found	High	Peak Found	Dimethyl [K97]	1984	ENSG00000132507.17	EIF5A	17	cell death;metabolic process;regulation of biological process;transport	cytoplasm;cytosol;membrane;nucleus	protein binding;RNA binding	Pf01287	0.949	0.35	-0.08	-1.51	7.76341e+06	7.36595e+06	1.29808e+07	4.54449e+06	1	1	1	1	0.259	0	0	1
FALSE	Medium	IsMasterProtein	Q13200	26S proteasome non-ATPase regulatory subunit 2 OS=Homo sapiens GN=PSMD2 PE=1 SV=3	FALSE	0.02	1.829	1.87225	1	1	1	1	908	100.1	5.2	Not Found	Not Found	Not Found	Not Found		5708	ENSG00000175166.16	PSMD2	3	metabolic process;regulation of biological process;response to stimulus;transport	cytoplasm;cytosol;extracellular;membrane;nucleus;organelle lumen;proteasome	catalytic activity;enzyme regulator activity;nucleotide binding;protein binding	Pf01851													0.04	0	0	1
FALSE	Medium	IsMasterProtein	P11908-2	Isoform 2 of Ribose-phosphate pyrophosphokinase 2 OS=Homo sapiens GN=PRPS2	FALSE	0.02	1.82	3.73832	1	1	1	1	321	35	6.46	High	Peak Found	Not Found	Not Found		5634	ENSG00000101911.12	PRPS2	X	metabolic process		catalytic activity;metal ion binding;nucleotide binding;protein binding	Pf00156, Pf13793, Pf14572	0.362		-1.46		7.16981e+06	2.59722e+06			1	1			0.129	0	0	1
FALSE	Medium	IsMasterProtein	P26368	Splicing factor U2AF 65 kDa subunit OS=Homo sapiens GN=U2AF2 PE=1 SV=4	FALSE	0.02	1.819	3.78947	1	1	1	1	475	53.5	9.09	Peak Found	High	Not Found	Not Found		11338	ENSG00000063244.12	U2AF2	19	metabolic process;regulation of biological process;transport	nucleus;spliceosomal complex	nucleotide binding;protein binding;RNA binding	Pf00076, Pf13893, Pf14259	2.762		1.47		699410	1.93163e+06			1	1			0.116	0	0	1
FALSE	Medium	IsMasterProtein	Q9NXR7-1	Isoform 1 of BRCA1-A complex subunit BRE OS=Homo sapiens GN=BRE	FALSE	0.02	1.818	3.37349	1	1	1	1	415	46.9	6.14	Not Found	Not Found	High	Not Found		9577	ENSG00000158019.20	BRE	2	cell death;cell division;cell organization and biogenesis;metabolic process;regulation of biological process;response to stimulus	cytoplasm;cytosol;nucleus	protein binding	Pf06113		0.01		-6.64			1.60541e+06				1		0.101	0	0	1
FALSE	Medium	IsMasterProtein	Q04637-9	Isoform 9 of Eukaryotic translation initiation factor 4 gamma 1 OS=Homo sapiens GN=EIF4G1	FALSE	0.02	1.809	1.18306	1	2	1	1	1606	176.1	5.34	Not Found	Not Found	High	Peak Found	Dimethyl [K1081]		ENSG00000114867.20		3			protein binding;RNA binding	Pf00566, Pf02020, Pf02847, Pf02854		0.514		-0.96			1.73401e+06	891151			1	1	0.03	0	0	1
FALSE	Medium	IsMasterProtein	P15328	Folate receptor alpha OS=Homo sapiens GN=FOLR1 PE=1 SV=3	FALSE	0.02	1.799	4.28016	1	1	1	1	257	29.8	7.97	High	Peak Found	Not Found	Not Found	Dimethyl [K41]	2348	ENSG00000110195.12	FOLR1	11	cell communication;cell organization and biogenesis;cellular component movement;metabolic process;regulation of biological process;response to stimulus;transport	cell surface;endosome;extracellular;membrane;nucleus	receptor activity;transporter activity	Pf03024	1.279		0.35		2.71181e+06	3.46771e+06			1	1			0.155	0	0	1
FALSE	Medium	IsMasterProtein	O95373	Importin-7 OS=Homo sapiens GN=IPO7 PE=1 SV=1	FALSE	0.02	1.795	0.867052	1	2	1	1	1038	119.4	4.82	High	Peak Found	Not Found	Not Found		10527	ENSG00000205339.9	IPO7	11	defense response;regulation of biological process;response to stimulus;transport	cytoplasm;cytosol;membrane;nucleus	enzyme regulator activity;protein binding;transporter activity	Pf03810, Pf08506	0.083		-3.59		5.3095e+06	441836			1	1			0.048	0	0	1
FALSE	Medium	IsMasterProtein	O00303	Eukaryotic translation initiation factor 3 subunit F OS=Homo sapiens GN=EIF3F PE=1 SV=1	FALSE	0.02	1.786	4.20168	1	1	1	1	357	37.5	5.45	High	Peak Found	Not Found	Not Found		8665	ENSG00000280606.3; ENSG00000175390.13	EIF3F	11; CHR_HSCHR11_1_CTG1_2	metabolic process	cytoplasm;cytosol;membrane	catalytic activity;protein binding;RNA binding	Pf01398, Pf13012	0.113		-3.15		1.06089e+06	119497			1	1			0.145	0	0	1
FALSE	Medium	IsMasterProtein	Q15165	Serum paraoxonase/arylesterase 2 OS=Homo sapiens GN=PON2 PE=1 SV=3	FALSE	0.02	1.739	3.9548	1	1	1	1	354	39.4	5.6	Not Found	Not Found	High	Peak Found	Dimethyl [K46]	5445		PON2	7	metabolic process;response to stimulus	extracellular;membrane;mitochondrion;nucleus;vacuole	catalytic activity;metal ion binding;protein binding	Pf01731, Pf08450		0.074		-3.76			1758581	129365			1	1	0.145	0	0	1
FALSE	Medium	IsMasterProtein	P33991	DNA replication licensing factor MCM4 OS=Homo sapiens GN=MCM4 PE=1 SV=5	FALSE	0.02	1.736	2.3175	1	1	1	1	863	96.5	6.74	High	Not Found	Not Found	Not Found	Dimethyl [K216]	4173	ENSG00000104738.16	MCM4	8	metabolic process	membrane;nucleus	catalytic activity;DNA binding;nucleotide binding;protein binding	Pf00493, Pf07728, Pf14551	0.01		-6.64		946448				1				0.046	0	0	1
FALSE	Medium	IsMasterProtein	O43143	Pre-mRNA-splicing factor ATP-dependent RNA helicase DHX15 OS=Homo sapiens GN=DHX15 PE=1 SV=2	FALSE	0.02	1.732	1.63522	1	1	1	1	795	90.9	7.46	Not Found	Not Found	Peak Found	High		1665	ENSG00000109606.12	DHX15	4	metabolic process;response to stimulus	cytoplasm;nucleus;spliceosomal complex	catalytic activity;nucleotide binding;protein binding;RNA binding	Pf00270, Pf00271, Pf04408, Pf07717, Pf13401		0.839		-0.25			2.25268e+06	1.88971e+06			1	1	0.053	0	0	1
FALSE	Medium	IsMasterProtein	Q4L235	Acyl-CoA synthetase family member 4 OS=Homo sapiens GN=AASDH PE=1 SV=3	FALSE	0.02	1.73	1.00182	1	2	1	1	1098	122.5	7.24	Not Found	Not Found	Not Found	Not Found	Dimethyl [K179]	132949	ENSG00000157426.13	AASDH	4	metabolic process		catalytic activity;nucleotide binding	Pf00501, Pf00550, Pf13360, Pf13570													0.039	0	1.78	1
FALSE	Medium	IsMasterProtein	Q8N4C6-7	Isoform 7 of Ninein OS=Homo sapiens GN=NIN	FALSE	0.02	1.719	0.703235	1	8	1	1	2133	248	5.03	Not Found	High	Peak Found	High			ENSG00000100503.23		14	metabolic process			Pf04111, Pf09731, Pf13166	100	12.632	6.64	3.66		2.37371e+06	509098	6.43109e+06		1	1	1	0.017	0	0	1
FALSE	Medium	IsMasterProtein	P63279	SUMO-conjugating enzyme UBC9 OS=Homo sapiens GN=UBE2I PE=1 SV=1	FALSE	0.02	1.716	7.59494	1	1	1	1	158	18	8.66	Peak Found	High	Not Found	Not Found		7329	ENSG00000103275.19	UBE2I	16	cell division;cell organization and biogenesis;metabolic process;regulation of biological process;response to stimulus	cytoplasm;cytosol;nucleus	catalytic activity;nucleotide binding;protein binding;RNA binding	Pf00179, Pf14461	3.608		1.85		453395	1.63602e+06			1	1			0.334	0	0	1
FALSE	Medium	IsMasterProtein	Q13155	Aminoacyl tRNA synthase complex-interacting multifunctional protein 2 OS=Homo sapiens GN=AIMP2 PE=1 SV=2	FALSE	0.02	1.715	4.0625	1	1	1	1	320	35.3	8.22	High	Peak Found	Not Found	Not Found	Dimethyl [K317]	7965	ENSG00000106305.9	AIMP2	7	cell death;cell differentiation;development;metabolic process;regulation of biological process	cytoplasm;cytosol;membrane;nucleus	protein binding	Pf13410, Pf14497	0.109		-3.19		3.61013e+06	394797			1	1			0.122	0	0	1
FALSE	Medium	IsMasterProtein	Q09161	Nuclear cap-binding protein subunit 1 OS=Homo sapiens GN=NCBP1 PE=1 SV=1	FALSE	0.02	1.708	2.78481	1	1	1	1	790	91.8	6.43	Not Found	Not Found	Not Found	Not Found	Dimethyl [K486]	4686	ENSG00000136937.12	NCBP1	9	metabolic process;regulation of biological process;response to stimulus;transport	cytoplasm;cytosol;mitochondrion;nucleus	protein binding;RNA binding	Pf02854, Pf09088, Pf09090													0.058	0	0	1
FALSE	Medium	IsMasterProtein	P00338-3	Isoform 3 of L-lactate dehydrogenase A chain OS=Homo sapiens GN=LDHA	FALSE	0.02	1.704	2.21607	1	1	1	1	361	39.8	8.43	High	Not Found	Not Found	Not Found	Dimethyl [K155]	3939	ENSG00000134333.13	LDHA	11	metabolic process;regulation of biological process;response to stimulus	cytosol;membrane;nucleus	catalytic activity;nucleotide binding;protein binding	Pf00056, Pf02866	0.01		-6.64		2.88099e+06				1				0.086	0	0	1
FALSE	Medium	IsMasterProtein	B9A064	Immunoglobulin lambda-like polypeptide 5 OS=Homo sapiens GN=IGLL5 PE=2 SV=2	FALSE	0.02	1.702	3.73832	1	1	1	1	214	23	8.84	Not Found	Not Found	High	Peak Found	Dimethyl [K112]	100423062	ENSG00000254709.7	IGLL5	22	cell organization and biogenesis;defense response;metabolic process;regulation of biological process;response to stimulus	extracellular	protein binding	Pf07654, Pf08205, Pf13927		0.835		-0.26			2.11807e+07	1.7677e+07			1	1	0.212	0	0	1
FALSE	Medium	IsMasterProtein	Q92900	Regulator of nonsense transcripts 1 OS=Homo sapiens GN=UPF1 PE=1 SV=2	FALSE	0.02	1.691	1.59433	1	1	1	1	1129	124.3	6.61	High	Peak Found	Not Found	Not Found	Dimethyl [K509]	5976	ENSG00000005007.12	UPF1	19	cell organization and biogenesis;cellular homeostasis;metabolic process;regulation of biological process;response to stimulus;transport	chromosome;cytoplasm;cytosol;nucleus;spliceosomal complex	catalytic activity;DNA binding;metal ion binding;nucleotide binding;protein binding;RNA binding	Pf04851, Pf09416, Pf13086, Pf13087, Pf13245, Pf13604	0.167		-2.58		3.47041e+06	580752			1	1			0.038	0	0	1
FALSE	Medium	IsMasterProtein	Q92843-2	Isoform 3 of Bcl-2-like protein 2 OS=Homo sapiens GN=BCL2L2	FALSE	0.02	1.683	3.3033	1	1	1	1	333	37.1	8.13	High	Peak Found	Not Found	Not Found			ENSG00000258643.5		14	regulation of biological process			Pf00076, Pf00452, Pf02180, Pf13893, Pf14259	0.217		-2.21		6.19179e+06	1.34095e+06			1	1			0.116	0	0	1
FALSE	Medium	IsMasterProtein	Q96JP2	Unconventional myosin-XVB OS=Homo sapiens GN=MYO15B PE=1 SV=2	FALSE	0.02	1.678	1.11111	1	4	1	1	1530	167	8.41	High	Not Found	High	Peak Found	Dimethyl [K125]			LOC100134144			cytoplasm;cytoskeleton	catalytic activity;motor activity;nucleotide binding;protein binding	Pf00063, Pf00784, Pf07653, Pf14604	0.01	0.111	-6.64	-3.17	4697297		6.60951e+06	732399	1		1	1	0.029	0	0	1
FALSE	Medium	IsMasterProtein	Q16891	MICOS complex subunit MIC60 OS=Homo sapiens GN=IMMT PE=1 SV=1	FALSE	0.02	1.675	1.84697	1	2	1	1	758	83.6	6.48	High	Not Found	High	Not Found	Dimethyl [K385]	10989	ENSG00000132305.20	IMMT	2	cell organization and biogenesis;cellular homeostasis	membrane;mitochondrion	protein binding;RNA binding	Pf09731	0.01	0.01	-6.64	-6.64	2.68195e+06		1.79386e+06		1		1		0.044	0	0	1
FALSE	Medium	IsMasterProtein	Q15424-3	Isoform 3 of Scaffold attachment factor B1 OS=Homo sapiens GN=SAFB	FALSE	0.02	1.672	1.30862	1	1	1	1	917	102.8	5.49	Not Found	High	Not Found	Not Found		6294	ENSG00000160633.12	SAFB	19	cell organization and biogenesis;metabolic process;regulation of biological process;response to stimulus	nucleus	DNA binding;nucleotide binding;protein binding;RNA binding	Pf00076, Pf02037, Pf13893, Pf14259	100		6.64			789378				1			0.046	0	0	1
FALSE	Medium	IsMasterProtein	Q16890	Tumor protein D53 OS=Homo sapiens GN=TPD52L1 PE=1 SV=1	FALSE	0.021	1.664	6.86275	1	1	1	1	204	22.4	5.62	High	Peak Found	Not Found	Not Found	Dimethyl [K123]	7164	ENSG00000111907.20	TPD52L1	6	regulation of biological process	cytoplasm	protein binding	Pf04201	1.05		0.07		4.37455e+06	4.59382e+06			1	1			0.179	0	0	1
FALSE	Medium	IsMasterProtein	P11166	Solute carrier family 2, facilitated glucose transporter member 1 OS=Homo sapiens GN=SLC2A1 PE=1 SV=2	FALSE	0.021	1.656	2.03252	1	1	1	1	492	54	8.72	Not Found	Not Found	High	Not Found		6513	ENSG00000117394.20	SLC2A1	1	cell communication;cell organization and biogenesis;metabolic process;regulation of biological process;response to stimulus;transport	cytoplasm;cytoskeleton;cytosol;membrane;nucleus	protein binding;transporter activity	Pf00083, Pf07690, Pf13347													0.145	0	0	1
FALSE	Medium	IsMasterProtein	P15086	Carboxypeptidase B OS=Homo sapiens GN=CPB1 PE=1 SV=4	FALSE	0.022	1.635	2.39808	1	1	1	1	417	47.3	6.61	High	Not Found	Not Found	Not Found	Dimethyl [K209]	1360	ENSG00000153002.11	CPB1	3	metabolic process	extracellular	catalytic activity;metal ion binding	Pf00246, Pf02244	0.01		-6.64		1.58949e+06				1				0.089	0	0	1
FALSE	Medium	IsMasterProtein	Q15024	Exosome complex component RRP42 OS=Homo sapiens GN=EXOSC7 PE=1 SV=3	FALSE	0.022	1.625	3.78007	1	1	1	1	291	31.8	5.19	Not Found	Not Found	High	Not Found	Dimethyl [K63]	23016	ENSG00000075914.12	EXOSC7	3	metabolic process;regulation of biological process	cytoplasm;cytosol;nucleus	catalytic activity;protein binding;RNA binding	Pf01138, Pf03725		0.01		-6.64			503084				1		0.122	0	0	1
FALSE	Medium	IsMasterProtein	Q9Y230	RuvB-like 2 OS=Homo sapiens GN=RUVBL2 PE=1 SV=3	FALSE	0.022	1.621	3.67171	1	1	1	1	463	51.1	5.64	High	Peak Found	Not Found	Not Found		10856	ENSG00000183207.13	RUVBL2	19	cell organization and biogenesis;metabolic process;regulation of biological process;response to stimulus	cytoplasm;cytosol;membrane;nucleus	catalytic activity;DNA binding;nucleotide binding;protein binding	Pf00004, Pf03796, Pf06068, Pf13481	0.289		-1.79		3.13101e+06	905276			1	1			0.083	0	0	1
FALSE	Medium	IsMasterProtein	Q3ZCQ8-2	Isoform 2 of Mitochondrial import inner membrane translocase subunit TIM50 OS=Homo sapiens GN=TIMM50	FALSE	0.023	1.599	2.41228	1	1	1	1	456	50.4	9.42	High	Not Found	Not Found	Not Found		92609	ENSG00000105197.10	TIMM50	19	cell organization and biogenesis;metabolic process;transport	membrane;mitochondrion	catalytic activity;protein binding;RNA binding	Pf03031													0.096	0	0	1
FALSE	Medium	IsMasterProtein	Q99623	Prohibitin-2 OS=Homo sapiens GN=PHB2 PE=1 SV=2	FALSE	0.023	1.598	3.34448	1	1	1	1	299	33.3	9.83	Not Found	Not Found	High	Not Found		11331	ENSG00000215021.8	PHB2	12	cell organization and biogenesis;metabolic process;regulation of biological process;transport	cell surface;cytoplasm;membrane;mitochondrion;nucleus	protein binding	Pf01145		0.01		-6.64			813979				1		0.093	0	0	1
FALSE	Medium	IsMasterProtein	Q71DI3	Histone H3.2 OS=Homo sapiens GN=HIST2H3A PE=1 SV=3	FALSE	0.023	1.589	23.5294	1	1	1	1	136	15.4	11.27	Not Found	High	Not Found	Not Found		333932; 126961; 653604	ENSG00000203852.3; ENSG00000183598.3; ENSG00000203811.1	HIST2H3A; HIST2H3C; HIST2H3D	1	cell organization and biogenesis;coagulation;metabolic process;regulation of biological process	chromosome;extracellular;nucleus	DNA binding;protein binding	Pf00125	100		6.64			420481				1			0.389	0	0	1
FALSE	Medium	IsMasterProtein	Q15181	Inorganic pyrophosphatase OS=Homo sapiens GN=PPA1 PE=1 SV=2	FALSE	0.023	1.579	4.84429	1	1	1	1	289	32.6	5.86	High	Peak Found	Not Found	Not Found	Dimethyl [K179]	5464	ENSG00000180817.11	PPA1	10	metabolic process	cytoplasm;cytosol	catalytic activity;metal ion binding	Pf00719	0.133		-2.91		1.90142e+06	253308			1	1			0.122	0	0	1
FALSE	Medium	IsMasterProtein	O95477	ATP-binding cassette sub-family A member 1 OS=Homo sapiens GN=ABCA1 PE=1 SV=3	FALSE	0.023	1.579	0.309598	1	1	1	1	2261	254.1	6.86	High	Peak Found	Not Found	Not Found	Dimethyl [K118]	19	ENSG00000165029.15	ABCA1	9	cell organization and biogenesis;metabolic process;regulation of biological process;response to stimulus;transport	cell surface;Golgi;membrane	catalytic activity;nucleotide binding;protein binding;receptor activity;signal transducer activity;transporter activity	Pf00005, Pf12698, Pf13304, Pf13732	0.171		-2.54		6.92577e+06	1.18722e+06			1	1			0	0	0	1
FALSE	Medium	IsMasterProtein	Q13618	Cullin-3 OS=Homo sapiens GN=CUL3 PE=1 SV=2	FALSE	0.025	1.563	1.69271	1	1	1	1	768	88.9	8.48	Not Found	High	Not Found	Not Found		8452	ENSG00000036257.12	CUL3	2	cell death;cell division;cell organization and biogenesis;cellular component movement;metabolic process;regulation of biological process;response to stimulus;transport	cytoplasm;cytosol;Golgi;membrane;nucleus	catalytic activity;protein binding	Pf00888, Pf10557	100		6.64			4.37444e+06				1			0.046	0	0	1
FALSE	Medium	IsMasterProtein	P49915	GMP synthase [glutamine-hydrolyzing] OS=Homo sapiens GN=GMPS PE=1 SV=1	FALSE	0.025	1.561	1.1544	1	1	1	1	693	76.7	6.87	High	Peak Found	Not Found	Not Found	Dimethyl [K346]	8833	ENSG00000163655.15	GMPS	3	metabolic process	cytoplasm;cytosol	catalytic activity;nucleotide binding	Pf00117, Pf00733, Pf00958, Pf01171, Pf02540, Pf03054, Pf06508, Pf07722	0.14		-2.84		1.31201e+06	183293			1	1			0.053	0	0	1
FALSE	Medium	IsMasterProtein	Q8N8S7	Protein enabled homolog OS=Homo sapiens GN=ENAH PE=1 SV=2	FALSE	0.025	1.561	3.7225	1	1	1	1	591	66.5	6.93	Not Found	Not Found	High	Not Found		55740	ENSG00000154380.17	ENAH	1	cellular component movement	cytoplasm;cytoskeleton;cytosol;membrane	protein binding	Pf00568, Pf08776													0.096	0	0	1
FALSE	Medium	IsMasterProtein	P0CF74	Ig lambda-6 chain C region OS=Homo sapiens GN=IGLC6 PE=4 SV=1	FALSE	0.025	1.552	15.0943	1	1	1	1	106	11.3	7.24	High	Peak Found	Not Found	Not Found	Dimethyl [K39]	3542		IGLC6	22	cell organization and biogenesis;cellular component movement;defense response;metabolic process;regulation of biological process;response to stimulus;transport	extracellular;membrane	catalytic activity;protein binding	Pf07654, Pf08205, Pf13927	0.406		-1.3		2.30711e+07	9.3639e+06			1	1			0.468	0	0	1
FALSE	Medium	IsMasterProtein	P26640	Valine--tRNA ligase OS=Homo sapiens GN=VARS PE=1 SV=4	FALSE	0.025	1.552	1.26582	1	1	1	1	1264	140.4	7.59	Not Found	High	Not Found	Not Found		7407	ENSG00000096171.14; ENSG00000204394.12; ENSG00000226589.9	VARS	6; CHR_HSCHR6_MHC_DBB_CTG1; CHR_HSCHR6_MHC_COX_CTG1	metabolic process;regulation of biological process	cytosol;mitochondrion	catalytic activity;nucleotide binding;protein binding	Pf00043, Pf00133, Pf08264, Pf09334, Pf13603	100		6.64			260845				1			0.033	0	0	1
FALSE	Medium	IsMasterProtein	Q9GZV5	WW domain-containing transcription regulator protein 1 OS=Homo sapiens GN=WWTR1 PE=1 SV=1	FALSE	0.025	1.544	11	1	1	1	1	400	44.1	5.82	Not Found	Not Found	Not Found	Not Found	Dimethyl [K39]	25937	ENSG00000018408.14	WWTR1	3	cell differentiation;cell division;cell organization and biogenesis;metabolic process;regulation of biological process;response to stimulus	cytoplasm;cytosol;nucleus	protein binding	Pf00397													0.155	0	0	1
FALSE	Medium	IsMasterProtein	Q8N715	Coiled-coil domain-containing protein 185 OS=Homo sapiens GN=CCDC185 PE=1 SV=2	FALSE	0.025	1.524	1.76565	1	1	1	1	623	72.3	10.11	Not Found	High	Not Found	Not Found		164127	ENSG00000178395.6	C1orf65; CCDC185	1			protein binding	Pf15558													0.058	0	0	1
FALSE	Medium	IsMasterProtein	P46939-2	Isoform 2 of Utrophin OS=Homo sapiens GN=UTRN	FALSE	0.025	1.518	0.494474	1	1	1	1	3438	394.7	5.38	Not Found	Not Found	Not Found	High								metal ion binding;protein binding	Pf00307, Pf00397, Pf00435, Pf00569, Pf09068, Pf09069, Pf11971		100		6.64				104282				1	0.011	0	0	1
FALSE	Medium	IsMasterProtein	Q96DI7-2	Isoform 2 of U5 small nuclear ribonucleoprotein 40 kDa protein OS=Homo sapiens GN=SNRNP40	FALSE	0.025	1.513	2.44499	1	1	1	1	409	44.5	7.9	High	Peak Found	Not Found	Not Found	Dimethyl [K270]	9410		SNRNP40	1	metabolic process	cytosol;spliceosomal complex	protein binding;RNA binding	Pf00400	0.504		-0.99		1.15667e+06	583247			1	1			0.122	0	0	1
FALSE	Medium	IsMasterProtein	P06730-2	Isoform 2 of Eukaryotic translation initiation factor 4E OS=Homo sapiens GN=EIF4E	FALSE	0.025	1.501	2.82258	1	1	1	1	248	28.8	6.42	High	Peak Found	Not Found	Not Found	Dimethyl [K119]	1977	ENSG00000151247.12	EIF4E	4	defense response;metabolic process;regulation of biological process;response to stimulus;transport	cytoplasm;cytosol	protein binding;RNA binding	Pf01652	0.342		-1.55		4.49585e+06	1.53804e+06			1	1			0	0	0	1
FALSE	Medium	IsMasterProtein	Q9H4K7	Mitochondrial ribosome-associated GTPase 2 OS=Homo sapiens GN=MTG2 PE=1 SV=1	FALSE	0.028	1.486	5.41872	1	1	1	1	406	43.9	9.45	High	Peak Found	Not Found	Not Found	Dimethyl [K190]	26164	ENSG00000101181.17	GTPBP5; MTG2	20	metabolic process;regulation of biological process	membrane;mitochondrion;organelle lumen;ribosome	catalytic activity;metal ion binding;nucleotide binding	Pf00025, Pf01018, Pf01926, Pf02421, Pf08438, Pf10662	5.527		2.47		1.3606e+06	7.51973e+06			1	1			0.096	0	0	1
FALSE	Medium	IsMasterProtein	Q92990	Glomulin OS=Homo sapiens GN=GLMN PE=1 SV=2	FALSE	0.028	1.479	1.3468	1	1	1	1	594	68.2	5.33	Not Found	Not Found	High	Not Found	Dimethyl [K582]	11146	ENSG00000174842.16	GLMN	1	cell differentiation;regulation of biological process	cytoplasm	enzyme regulator activity;protein binding	Pf08568		0.01		-6.64			298784				1		0	0	0	1
FALSE	Medium	IsMasterProtein	Q13439-5	Isoform 5 of Golgin subfamily A member 4 OS=Homo sapiens GN=GOLGA4	FALSE	0.029	1.465	0.71333	1	1	1	1	2243	262.2	5.4	Not Found	Not Found	Not Found	High		2803	ENSG00000144674.16	GOLGA4	3	cell organization and biogenesis;regulation of biological process;transport	cytoplasm;cytosol;Golgi;membrane	protein binding	Pf01465, Pf09731, Pf12128		100		6.64				982616				1	0.014	0	0	1
FALSE	Medium	IsMasterProtein	P62857	40S ribosomal protein S28 OS=Homo sapiens GN=RPS28 PE=1 SV=1	FALSE	0.029	1.462	13.0435	1	1	1	1	69	7.8	10.7	Not Found	Not Found	High	Not Found		6234	ENSG00000233927.4	RPS28	19	cell organization and biogenesis;metabolic process;transport	cytosol;ribosome	protein binding;RNA binding;structural molecule activity	Pf01200													1.154	0	0	1
FALSE	Medium	IsMasterProtein	O60547	GDP-mannose 4,6 dehydratase OS=Homo sapiens GN=GMDS PE=1 SV=1	FALSE	0.033	1.448	3.76344	1	1	1	1	372	41.9	7.31	High	Peak Found	Not Found	Not Found	Dimethyl [K95]	2762	ENSG00000112699.10	GMDS	6	metabolic process;regulation of biological process;response to stimulus	cytoplasm;cytosol	catalytic activity;nucleotide binding;protein binding	Pf01370, Pf04321, Pf13460	0.133		-2.91		1.43498e+06	191297			1	1			0.08	0	0	1
FALSE	Medium	IsMasterProtein	Q86W92	Liprin-beta-1 OS=Homo sapiens GN=PPFIBP1 PE=1 SV=2	FALSE	0.033	1.445	1.58259	1	1	1	1	1011	114	5.55	Not Found	Not Found	Not Found	High		8496	ENSG00000110841.13	PPFIBP1	12	cell organization and biogenesis;metabolic process	membrane	protein binding	Pf00536, Pf04111, Pf05483, Pf05911, Pf07647		100		6.64				403449				1	0.04	0	0	1
FALSE	Medium	IsMasterProtein	P09497	Clathrin light chain B OS=Homo sapiens GN=CLTB PE=1 SV=1	FALSE	0.034	1.431	4.36681	1	1	1	1	229	25.2	4.64	Peak Found	High	Not Found	Not Found		1212	ENSG00000175416.12	CLTB	5	cell organization and biogenesis;transport	cytosol;membrane	protein binding;structural molecule activity	Pf01086	3.504		1.81		1.38602e+06	4.85719e+06			1	1			0.259	0	0	1
FALSE	Medium	IsMasterProtein	O75376	Nuclear receptor corepressor 1 OS=Homo sapiens GN=NCOR1 PE=1 SV=2	FALSE	0.035	1.419	0.778689	1	1	1	1	2440	270	7.11	Not Found	Not Found	High	Not Found		9611	ENSG00000141027.20	NCOR1	17	cell organization and biogenesis;metabolic process;regulation of biological process	cytosol;membrane;nucleus	DNA binding;protein binding	Pf00249, Pf13921		0.01		-6.64			314141				1		0.017	0	0	1
FALSE	Medium	IsMasterProtein	O14579	Coatomer subunit epsilon OS=Homo sapiens GN=COPE PE=1 SV=3	FALSE	0.035	1.411	5.51948	1	1	1	1	308	34.5	5.12	High	Not Found	Not Found	Not Found		11316	ENSG00000105669.13	COPE	19	transport	cytoplasm;cytosol;Golgi;membrane	protein binding;structural molecule activity	Pf04733	0.01		-6.64		554745				1				0.129	0	0	1
FALSE	Medium	IsMasterProtein	Q9BRP8	Partner of Y14 and mago OS=Homo sapiens GN=PYM1 PE=1 SV=1	FALSE	0.035	1.404	6.37255	1	1	1	1	204	22.6	9.45	High	Peak Found	Not Found	Not Found		84305	ENSG00000170473.16	WIBG; PYM1	12	cell organization and biogenesis;metabolic process;regulation of biological process	cytoplasm;cytosol;nucleus	protein binding;RNA binding	Pf09282	0.186		-2.43		1.05344e+06	195666			1	1			0.259	0	0	1
FALSE	Medium	IsMasterProtein	Q5RHP9	Glutamate-rich protein 3 OS=Homo sapiens GN=ERICH3 PE=2 SV=1	FALSE	0.035	1.397	0.392157	1	1	1	1	1530	168.4	4.88	Not Found	Not Found	Peak Found	High		127254	ENSG00000178965.13	C1orf173; ERICH3	1				Pf15257		8.069		3.01			932361	7.52364e+06			1	1	0.025	0	0	1
FALSE	Medium	IsMasterProtein	Q9NWB6	Arginine and glutamate-rich protein 1 OS=Homo sapiens GN=ARGLU1 PE=1 SV=1	FALSE	0.035	1.393	2.9304	1	1	1	1	273	33.2	10.35	Not Found	Not Found	Peak Found	High		55082	ENSG00000134884.13	ARGLU1	13	metabolic process;regulation of biological process	mitochondrion;nucleus	protein binding	Pf15346		2.147		1.1			5.16653e+06	1.10935e+07			1	1	0.166	0	0	1
FALSE	Medium	IsMasterProtein	Q96HH9-3	Isoform 3 of GRAM domain-containing protein 3 OS=Homo sapiens GN=GRAMD3	FALSE	0.035	1.376	3.3557	1	2	1	1	447	49.8	8.5	High	Not Found	High	Not Found	Dimethyl [K26]	65983	ENSG00000155324.9	GRAMD3	5			protein binding	Pf02893	0.01	0.01	-6.64	-6.64	47962256		5.47164e+07		1		1		0.086	0	0	1
FALSE	Medium	IsMasterProtein	P49756	RNA-binding protein 25 OS=Homo sapiens GN=RBM25 PE=1 SV=3	FALSE	0.036	1.37	1.77936	1	1	1	1	843	100.1	6.32	Not Found	High	Not Found	Not Found		58517	ENSG00000119707.13	RBM25	14	metabolic process;regulation of biological process	cytoplasm;nucleus;spliceosomal complex	nucleotide binding;protein binding;RNA binding	Pf00076, Pf01480, Pf14259													0.07	0	0	1
FALSE	Medium	IsMasterProtein	Q14558-2	Isoform 2 of Phosphoribosyl pyrophosphate synthase-associated protein 1 OS=Homo sapiens GN=PRPSAP1	FALSE	0.036	1.362	4.41558	1	1	1	1	385	42.4	8.47	Not Found	Not Found	Not Found	Not Found		5635	ENSG00000161542.16	PRPSAP1	17	metabolic process;regulation of biological process		catalytic activity;enzyme regulator activity;metal ion binding;protein binding	Pf13793, Pf14572													0.093	0	0	1
FALSE	Medium	IsMasterProtein	P51151	Ras-related protein Rab-9A OS=Homo sapiens GN=RAB9A PE=1 SV=1	FALSE	0.036	1.361	6.46766	1	1	1	1	201	22.8	5.47	High	Not Found	Not Found	Not Found	Dimethyl [K125]	9367	ENSG00000123595.7	RAB9A	X	cell organization and biogenesis;regulation of biological process;response to stimulus;transport	cytosol;endoplasmic reticulum;endosome;Golgi;membrane;vacuole	catalytic activity;nucleotide binding;protein binding	Pf00025, Pf00071, Pf01926, Pf04670, Pf08477	0.01		-6.64		2.5795e+06				1				0.179	0	0	1
FALSE	Medium	IsMasterProtein	P78381-4	Isoform 4 of UDP-galactose translocator OS=Homo sapiens GN=SLC35A2	FALSE	0.036	1.358	2.61283	1	1	1	1	421	44.1	9.72	Not Found	Not Found	High	Not Found	Dimethyl [K416]	7355	ENSG00000102100.15	SLC35A2	X	metabolic process;transport	endoplasmic reticulum;Golgi;membrane;nucleus	transporter activity	Pf04142		0.01		-6.64			350412				1		0.145	0	0	1
FALSE	Medium	IsMasterProtein	Q14204	Cytoplasmic dynein 1 heavy chain 1 OS=Homo sapiens GN=DYNC1H1 PE=1 SV=5	FALSE	0.036	1.354	0.344382	1	1	1	1	4646	532.1	6.4	Not Found	Not Found	Not Found	Not Found	Dimethyl [K3774]	1778	ENSG00000197102.10	DYNC1H1	14	cell organization and biogenesis;cellular component movement;transport	cytoplasm;cytoskeleton;cytosol;extracellular;membrane;organelle lumen	catalytic activity;motor activity;nucleotide binding;protein binding;RNA binding	Pf00769, Pf03028, Pf03915, Pf04156, Pf07246, Pf07728, Pf08385, Pf08393, Pf12774, Pf12775, Pf12777, Pf12780, Pf12781, Pf13173, Pf13207, Pf13401													0.008	0	0	1
FALSE	Medium	IsMasterProtein	Q8N1F7	Nuclear pore complex protein Nup93 OS=Homo sapiens GN=NUP93 PE=1 SV=2	FALSE	0.037	1.329	1.8315	1	1	1	1	819	93.4	5.72	High	Not Found	Not Found	Not Found	Dimethyl [K106]	9688	ENSG00000102900.12	NUP93	16	cell organization and biogenesis;cellular component movement;metabolic process;regulation of biological process;response to stimulus;transport	membrane;nucleus	protein binding;structural molecule activity	Pf04097	0.01		-6.64		602351				1				0.04	0	0	1
FALSE	Medium	IsMasterProtein	P18085	ADP-ribosylation factor 4 OS=Homo sapiens GN=ARF4 PE=1 SV=3	FALSE	0.037	1.323	5.55556	1	1	1	1	180	20.5	7.14	High	Not Found	Not Found	Not Found	Dimethyl [K127]	378	ENSG00000168374.10	ARF4	3	cellular component movement;metabolic process;regulation of biological process;response to stimulus;transport	cytoplasm;cytosol;Golgi;membrane	catalytic activity;nucleotide binding;protein binding;signal transducer activity	Pf00025, Pf00071, Pf00503, Pf01926, Pf04670, Pf08477, Pf09439	0.01		-6.64		1.08223e+06				1				0.194	0	0	1
FALSE	Medium	IsMasterProtein	CON_P34955	SWISS-PROT P34955 (Bos taurus) Alpha-1-antiproteinase precursor	TRUE	0.037	1.314	1.68269	1	1	1	1	416	46.1	6.52	Not Found	Not Found	Peak Found	High											0.863		-0.21			7.96028e+06	6.87288e+06			1	1	0.089	0	0	1
FALSE	Medium	IsMasterProtein	O00468	Agrin OS=Homo sapiens GN=AGRN PE=1 SV=5	FALSE	0.04	1.299	0.967586	1	1	1	1	2067	217.1	6.39	Not Found	Not Found	Not Found	Not Found		375790		AGRN	1	cell differentiation;cell organization and biogenesis;development;metabolic process;regulation of biological process;response to stimulus	cytosol;extracellular;membrane;organelle lumen	metal ion binding;protein binding;structural molecule activity	Pf00050, Pf00053, Pf00054, Pf01390, Pf02210, Pf03146, Pf07648													0.022	0	0	1
FALSE	Medium	IsMasterProtein	P29016	T-cell surface glycoprotein CD1b OS=Homo sapiens GN=CD1B PE=1 SV=1	FALSE	0.042	1.286	5.40541	1	1	1	1	333	36.9	6.29	High	Not Found	Not Found	Not Found	Dimethyl [K282]	910	ENSG00000158485.10	CD1B	1	cell differentiation;defense response;metabolic process;regulation of biological process;response to stimulus;transport	cell surface;cytosol;endosome;extracellular;Golgi;membrane;organelle lumen;vacuole	protein binding	Pf07654													0.145	0	0	1
FALSE	Medium	IsMasterProtein	Q16576-2	Isoform 2 of Histone-binding protein RBBP7 OS=Homo sapiens GN=RBBP7	FALSE	0.042	1.278	1.91898	1	1	1	1	469	52.3	5.27	Not Found	High	Not Found	Not Found		5931	ENSG00000102054.17	RBBP7	X	cell organization and biogenesis;cell proliferation;development;metabolic process;regulation of biological process;response to stimulus	cytosol;nucleus	catalytic activity;protein binding;RNA binding	Pf00400, Pf12265	100		6.64			483731				1			0.11	0	0	1
FALSE	Medium	IsMasterProtein	Q15369	Transcription elongation factor B polypeptide 1 OS=Homo sapiens GN=TCEB1 PE=1 SV=1	FALSE	0.043	1.263	10.7143	1	1	1	1	112	12.5	4.78	High	Peak Found	Not Found	Not Found	Dimethyl [K32]	6921	ENSG00000154582.16	TCEB1; ELOC	8	metabolic process;regulation of biological process;response to stimulus	cytosol;nucleus	catalytic activity;protein binding;RNA binding	Pf03931	0.143		-2.8		4.09908e+06	587531			1	1			0.334	0	0	1
FALSE	Medium	IsMasterProtein	Q3SXY8	ADP-ribosylation factor-like protein 13B OS=Homo sapiens GN=ARL13B PE=1 SV=1	FALSE	0.044	1.262	3.97196	1	1	1	1	428	48.6	6.62	Not Found	Not Found	Not Found	Not Found	Dimethyl [K151]	200894	ENSG00000169379.15	ARL13B	3	cell organization and biogenesis;cellular component movement;regulation of biological process;response to stimulus	membrane	catalytic activity;nucleotide binding;protein binding;signal transducer activity	Pf00009, Pf00025, Pf00071, Pf00503, Pf01926, Pf05890, Pf07946, Pf08477, Pf09439													0.105	0	0	1
FALSE	Medium	IsMasterProtein	P55786	Puromycin-sensitive aminopeptidase OS=Homo sapiens GN=NPEPPS PE=1 SV=2	FALSE	0.044	1.258	1.41458	1	1	1	1	919	103.2	5.72	High	Not Found	Not Found	Not Found		9520	ENSG00000141279.15	NPEPPS	17	metabolic process;response to stimulus	cytoplasm;cytosol;membrane;nucleus	catalytic activity;metal ion binding	Pf01433, Pf11838, Pf13485													0.041	0	0	1
FALSE	Medium	IsMasterProtein	P26447	Protein S100-A4 OS=Homo sapiens GN=S100A4 PE=1 SV=1	FALSE	0.044	1.243	10.8911	1	1	1	1	101	11.7	6.11	High	Peak Found	Not Found	Not Found	Dimethyl [K18]	6275	ENSG00000196154.11	S100A4	1	cell organization and biogenesis;regulation of biological process	nucleus	metal ion binding;protein binding;RNA binding	Pf01023, Pf13499	0.677		-0.56		1.75119e+06	1.18555e+06			1	1			0.468	0	0	1
FALSE	Medium	IsMasterProtein	Q9GZT3	SRA stem-loop-interacting RNA-binding protein, mitochondrial OS=Homo sapiens GN=SLIRP PE=1 SV=1	FALSE	0.044	1.242	9.17431	1	1	1	1	109	12.3	10.24	High	Peak Found	Not Found	Not Found		81892	ENSG00000119705.9	SLIRP	14	cell organization and biogenesis;cellular component movement;metabolic process;regulation of biological process	cytoplasm;mitochondrion;nucleus	nucleotide binding;protein binding;RNA binding	Pf00076, Pf13893, Pf14259	0.26		-1.94		6.17642e+06	1.60431e+06			1	1			0.233	0	0	1
FALSE	Medium	IsMasterProtein	Q8TBC3	SH3KBP1-binding protein 1 OS=Homo sapiens GN=SHKBP1 PE=1 SV=2	FALSE	0.044	1.242	2.9703	1	1	1	1	707	76.3	8.28	High	Not Found	Not Found	Not Found		92799	ENSG00000160410.14	SHKBP1	19	cell organization and biogenesis;regulation of biological process	vacuole	protein binding	Pf02214	0.01		-6.64		936937				1				0.062	0	0	1
FALSE	Medium	IsMasterProtein	P53597	Succinyl-CoA ligase [ADP/GDP-forming] subunit alpha, mitochondrial OS=Homo sapiens GN=SUCLG1 PE=1 SV=4	FALSE	0.044	1.237	4.33526	1	1	1	1	346	36.2	8.79	Not Found	Not Found	High	Not Found	Dimethyl [K81]	8802	ENSG00000163541.11	SUCLG1	2	metabolic process	cytosol;membrane;mitochondrion;organelle lumen	catalytic activity;nucleotide binding;RNA binding	Pf00549, Pf02629, Pf13607		0.01		-6.64			237205				1		0.166	0	0	1
FALSE	Medium	IsMasterProtein	P47897	Glutamine--tRNA ligase OS=Homo sapiens GN=QARS PE=1 SV=1	FALSE	0.044	1.233	2.58065	1	1	1	1	775	87.7	7.15	Not Found	Not Found	High	Peak Found		5859	ENSG00000172053.17	QARS	3	metabolic process	cytoplasm;cytosol;mitochondrion;organelle lumen	catalytic activity;nucleotide binding;protein binding;RNA binding	Pf00749, Pf03950, Pf04557, Pf04558		0.177		-2.49			1.74655e+06	309973			1	1	0	0	0	1
FALSE	Medium	IsMasterProtein	Q00059	Transcription factor A, mitochondrial OS=Homo sapiens GN=TFAM PE=1 SV=1	FALSE	0.044	1.231	6.09756	1	1	1	1	246	29.1	9.72	High	Not Found	Not Found	Not Found	Dimethyl [K118; K131]	7019	ENSG00000108064.10	TFAM	10	cell organization and biogenesis;metabolic process;regulation of biological process	cytosol;mitochondrion;nucleus;organelle lumen	DNA binding;protein binding;RNA binding	Pf00505, Pf09011	0.01		-6.64		2.15984e+06				1				0.122	0	0	1
FALSE	Medium	IsMasterProtein	Q9BR76	Coronin-1B OS=Homo sapiens GN=CORO1B PE=1 SV=1	FALSE	0.046	1.225	2.04499	1	1	1	1	489	54.2	5.88	Not Found	Not Found	High	Peak Found		57175	ENSG00000172725.13	CORO1B	11	cell organization and biogenesis;cellular component movement;regulation of biological process;response to stimulus	cytoplasm;cytoskeleton;cytosol;membrane	protein binding	Pf00400, Pf08953, Pf08954		0.516		-0.95			1.49613e+06	771957			1	1	0.096	0	0	1
FALSE	Medium	IsMasterProtein	Q7Z2W7	Transient receptor potential cation channel subfamily M member 8 OS=Homo sapiens GN=TRPM8 PE=1 SV=2	FALSE	0.046	1.221	0.724638	1	2	1	1	1104	127.6	7.24	High	Peak Found	High	Peak Found	Dimethyl [K175]	79054	ENSG00000144481.16	TRPM8	2	cell organization and biogenesis;cellular homeostasis;response to stimulus;transport	endoplasmic reticulum;membrane	catalytic activity;protein binding;transporter activity	Pf00520, Pf01757	0.164	0.317	-2.6	-1.66	8.67201e+07	1.42613e+07	81286821	2.57707e+07	1	1	1	1	0.044	0	0	1
FALSE	Medium	IsMasterProtein	Q13148	TAR DNA-binding protein 43 OS=Homo sapiens GN=TARDBP PE=1 SV=1	FALSE	0.046	1.221	4.34783	1	1	1	1	414	44.7	6.19	Not Found	Not Found	Not Found	Not Found		23435	ENSG00000120948.16	TARDBP	1	cell organization and biogenesis;metabolic process;regulation of biological process;response to stimulus	cytoplasm;nucleus	DNA binding;nucleotide binding;protein binding;RNA binding	Pf00076, Pf13893, Pf14259													0.129	0	0	1
FALSE	Medium	IsMasterProtein	P31644	Gamma-aminobutyric acid receptor subunit alpha-5 OS=Homo sapiens GN=GABRA5 PE=1 SV=1	FALSE	0.046	1.221	3.8961	1	1	1	1	462	52.1	9.16	Not Found	High	Not Found	Not Found		2558	ENSG00000186297.11	GABRA5	15	cell communication;defense response;regulation of biological process;response to stimulus;transport	membrane	protein binding;receptor activity;signal transducer activity;transporter activity	Pf02931, Pf02932	100		6.64			3.84672e+06				1			0.089	0	0	1
FALSE	Medium	IsMasterProtein	O43837	Isocitrate dehydrogenase [NAD] subunit beta, mitochondrial OS=Homo sapiens GN=IDH3B PE=1 SV=2	FALSE	0.049	1.202	2.5974	1	1	1	1	385	42.2	8.46	Not Found	Not Found	High	Not Found		3420	ENSG00000101365.20	IDH3B	20	metabolic process	mitochondrion;nucleus;organelle lumen	catalytic activity;metal ion binding;nucleotide binding	Pf00180		0.01		-6.64			348896				1		0.105	0	0	1
FALSE	Medium	IsMasterProtein	Q66PJ3	ADP-ribosylation factor-like protein 6-interacting protein 4 OS=Homo sapiens GN=ARL6IP4 PE=1 SV=2	FALSE	0.049	1.194	4.51306	1	1	1	1	421	44.9	10.93	High	Peak Found	Not Found	Not Found		51329	ENSG00000182196.13	ARL6IP4	12	metabolic process	nucleus	protein binding;RNA binding	Pf10500	0.755		-0.4		1.86554e+06	1.40902e+06			1	1			0.11	0	0	1
FALSE	Medium	IsMasterProtein	P00966	Argininosuccinate synthase OS=Homo sapiens GN=ASS1 PE=1 SV=2	FALSE	0.049	1.193	4.61165	1	1	1	1	412	46.5	8.02	Not Found	Not Found	Not Found	Not Found		445	ENSG00000130707.17	ASS1	9	defense response;metabolic process;regulation of biological process;response to stimulus	cytoplasm;cytosol;endoplasmic reticulum;membrane;mitochondrion;nucleus;vacuole	catalytic activity;nucleotide binding;protein binding;RNA binding	Pf00764, Pf03054, Pf06508													0	0	0	1
FALSE	Medium	IsMasterProtein	Q7Z3G6	Prickle-like protein 2 OS=Homo sapiens GN=PRICKLE2 PE=1 SV=2	FALSE	0.049	1.193	2.48815	1	1	1	1	844	95.6	7.36	Not Found	Not Found	High	Peak Found	Dimethyl [K562]	166336	ENSG00000163637.12	PRICKLE2	3	regulation of biological process;response to stimulus	cytoplasm;membrane;nucleus	metal ion binding	Pf00412, Pf06297		0.524		-0.93			5036218	2.63994e+06			1	1	0.047	0	0	1
FALSE	Medium	IsMasterProtein	Q13332	Receptor-type tyrosine-protein phosphatase S OS=Homo sapiens GN=PTPRS PE=1 SV=3	FALSE	0.049	1.189	1.07803	1	1	1	1	1948	216.9	6.46	Not Found	Not Found	Not Found	High		5802	ENSG00000105426.16	PTPRS	19	metabolic process;regulation of biological process	membrane	catalytic activity;protein binding;receptor activity;signal transducer activity	Pf00041, Pf00047, Pf00102, Pf07679, Pf09294, Pf13895, Pf13927, Pf14566		100		6.64				15210320				1	0.023	0	0	1
FALSE	Medium	IsMasterProtein	Q8WTZ4	Putative inactive carbonic anhydrase 5B-like protein OS=Homo sapiens GN=CA5BP1 PE=5 SV=2	FALSE	0.049	1.185	10.7692	1	1	1	1	195	22.6	10.76	Not Found	Not Found	High	Not Found	Dimethyl [K21]	11238; 340591		CA5B; CA5BP1	X	metabolic process;transport	mitochondrion;organelle lumen	catalytic activity;metal ion binding	Pf00194		0.01		-6.64			2478936				1		0.179	0	0	1
FALSE	Low	IsMasterProtein	O60566-3	Isoform 3 of Mitotic checkpoint serine/threonine-protein kinase BUB1 beta OS=Homo sapiens GN=BUB1B	FALSE	0.053	1.126	1.50376	1	1	1	1	1064	121.3	5.36	Not Found	High	Not Found	Not Found			ENSG00000156970.12		15				Pf08311	100		6.64			391753				1			0.034	0	0	1
FALSE	Low	IsMasterProtein	P52943-2	Isoform 2 of Cysteine-rich protein 2 OS=Homo sapiens GN=CRIP2	FALSE	0.053	1.115	6.73759	1	1	1	1	282	30.2	8.22	Not Found	High	Not Found	Not Found		1397	ENSG00000182809.10	CRIP2	14	regulation of biological process		metal ion binding	Pf00412	100		6.64			145488				1			0.166	0	0	1
FALSE	Low	IsMasterProtein	O14639	Actin-binding LIM protein 1 OS=Homo sapiens GN=ABLIM1 PE=1 SV=3	FALSE	0.057	1.049	1.54242	1	1	1	1	778	87.6	8.59	Peak Found	High	Not Found	Not Found		3983	ENSG00000099204.18	ABLIM1	10	cell organization and biogenesis	cytoplasm;cytoskeleton	metal ion binding;protein binding	Pf00412, Pf02209	7.289		2.87		402572	2.93426e+06			1	1			0.044	0	0	1

## Sheet: Protein Groups
Proteins
Checked	Protein Group ID	# Proteins	# Unique Peptides	# Peptides	# PSMs	Group Description	Found in Sample: [S1] F1: Light, Control	Found in Sample: [S3] F1: Heavy, Sample	Found in Sample: [S2] F2: Light, Control	Found in Sample: [S4] F2: Heavy, Sample
FALSE	436	11	143	164	548	[Master Protein] Myosin-9 OS=Homo sapiens GN=MYH9 PE=1 SV=4	High	High	High	High
FALSE	54	1	53	57	540	[Master Protein] SWISS-PROT P02769 (Bos taurus) Bovine serum albumin precursor	High	High	High	High
FALSE	122	3	45	46	79	[Master Protein] Isoform 3 of Carbamoyl-phosphate synthase [ammonia], mitochondrial OS=Homo sapiens GN=CPS1	High	High	High	High
FALSE	201	9	34	35	45	[Master Protein] Plectin OS=Homo sapiens GN=PLEC PE=1 SV=3	High	Peak Found	High	High
FALSE	498	14	33	54	108	[Master Protein] Isoform 4 of Myosin-10 OS=Homo sapiens GN=MYH10	Peak Found	High	Peak Found	High
FALSE	540	1	33	33	155	[Master Protein] Stress-70 protein, mitochondrial OS=Homo sapiens GN=HSPA9 PE=1 SV=2	High	High	High	High
FALSE	268	3	30	30	45	[Master Protein] Desmoplakin OS=Homo sapiens GN=DSP PE=1 SV=3	High	Peak Found	High	High
FALSE	66	27	29	30	74	[Master Protein] Vimentin OS=Homo sapiens GN=VIM PE=1 SV=4	High	High	High	High
FALSE	92	5	29	29	48	[Master Protein] Isoform 3 of LIM domain only protein 7 OS=Homo sapiens GN=LMO7	High	High	High	High
FALSE	245	31	27	30	79	[Master Protein] Isoform 2 of Keratin, type II cytoskeletal 8 OS=Homo sapiens GN=KRT8	High	High	High	High
FALSE	288	3	26	26	35	[Master Protein] Serine/arginine repetitive matrix protein 2 OS=Homo sapiens GN=SRRM2 PE=1 SV=2	Peak Found	High	Not Found	High
FALSE	304	3	25	28	109	[Master Protein] Heat shock cognate 71 kDa protein OS=Homo sapiens GN=HSPA8 PE=1 SV=1	High	High	High	High
FALSE	48	5	25	25	81	[Master Protein] Isoform 4 of LIM domain and actin-binding protein 1 OS=Homo sapiens GN=LIMA1	High	High	High	High
FALSE	35	4	25	25	44	[Master Protein] Isoform 3 of Hyaluronan mediated motility receptor OS=Homo sapiens GN=HMMR	Peak Found	High	Peak Found	High
FALSE	356	1	23	25	91	[Master Protein] 78 kDa glucose-regulated protein OS=Homo sapiens GN=HSPA5 PE=1 SV=2	High	High	High	High
FALSE	330	3	23	23	34	[Master Protein] Spectrin alpha chain, non-erythrocytic 1 OS=Homo sapiens GN=SPTAN1 PE=1 SV=3	Peak Found	High	High	High
FALSE	187	10	23	23	32	[Master Protein] LIM and calponin homology domains-containing protein 1 OS=Homo sapiens GN=LIMCH1 PE=1 SV=4	High	High	Peak Found	High
FALSE	58	16	22	22	29	[Master Protein] E3 SUMO-protein ligase RanBP2 OS=Homo sapiens GN=RANBP2 PE=1 SV=2	Peak Found	High	Peak Found	High
FALSE	464	1	20	20	59	[Master Protein] Nucleolin OS=Homo sapiens GN=NCL PE=1 SV=3	High	High	High	High
FALSE	294	3	20	20	54	[Master Protein] Tropomodulin-3 OS=Homo sapiens GN=TMOD3 PE=1 SV=1	High	High	High	High
FALSE	240	10	20	20	51	[Master Protein] Heat shock protein HSP 90-beta OS=Homo sapiens GN=HSP90AB1 PE=1 SV=4	High	High	High	High
FALSE	160	2	20	20	51	[Master Protein] E3 ubiquitin-protein ligase TRIM21 OS=Homo sapiens GN=TRIM21 PE=1 SV=1	High	High	High	High
FALSE	474	7	20	20	35	[Master Protein] Rho GTPase-activating protein 17 OS=Homo sapiens GN=ARHGAP17 PE=1 SV=1	Peak Found	High	Not Found	High
FALSE	426	3	19	21	70	[Master Protein] Heat shock 70 kDa protein 1B OS=Homo sapiens GN=HSPA1B PE=1 SV=1	High	High	High	High
FALSE	315	4	18	18	60	[Master Protein] Elongation factor 1-alpha 1 OS=Homo sapiens GN=EEF1A1 PE=1 SV=1	High	High	High	High
FALSE	247	2	18	18	49	[Master Protein] Isoform 2 of Elongation factor 1-gamma OS=Homo sapiens GN=EEF1G	High	High	High	High
FALSE	415	3	18	18	34	[Master Protein] ATP synthase subunit alpha, mitochondrial OS=Homo sapiens GN=ATP5A1 PE=1 SV=1	High	High	High	High
FALSE	567	5	18	18	30	[Master Protein] Pyruvate kinase PKM OS=Homo sapiens GN=PKM PE=1 SV=4	High	High	High	High
FALSE	21	3	18	18	29	[Master Protein] Unconventional myosin-Ic OS=Homo sapiens GN=MYO1C PE=1 SV=4	High	High	High	Peak Found
FALSE	165	10	18	18	29	[Master Protein] Filamin-A OS=Homo sapiens GN=FLNA PE=1 SV=4	High	High	High	High
FALSE	371	1	17	18	30	[Master Protein] Epiplakin OS=Homo sapiens GN=EPPK1 PE=1 SV=2	High	Peak Found	High	High
FALSE	466	4	16	16	22	[Master Protein] E3 ubiquitin-protein ligase TRIM33 OS=Homo sapiens GN=TRIM33 PE=1 SV=3	High	Peak Found	High	Peak Found
FALSE	513	4	16	16	16	[Master Protein] Clathrin heavy chain 1 OS=Homo sapiens GN=CLTC PE=1 SV=5	Peak Found	High	High	Peak Found
FALSE	308	3	15	15	65	[Master Protein] Granulins OS=Homo sapiens GN=GRN PE=1 SV=2	High	High	High	High
FALSE	256	6	15	15	43	[Master Protein] Keratin, type I cytoskeletal 18 OS=Homo sapiens GN=KRT18 PE=1 SV=2	High	High	High	High
FALSE	550	2	15	15	23	[Master Protein] Protein FAM83D OS=Homo sapiens GN=FAM83D PE=1 SV=3	Peak Found	High	Peak Found	High
FALSE	322	7	14	25	297	[Master Protein] Actin, cytoplasmic 1 OS=Homo sapiens GN=ACTB PE=1 SV=1	High	High	High	High
FALSE	223	5	14	15	21	[Master Protein] Spermatogenesis-associated protein 5 OS=Homo sapiens GN=SPATA5 PE=1 SV=3	Not Found	High	Peak Found	High
FALSE	302	1	14	14	34	[Master Protein] Thyroid hormone receptor-associated protein 3 OS=Homo sapiens GN=THRAP3 PE=1 SV=2	High	High	Peak Found	High
FALSE	379	1	14	14	30	[Master Protein] 60S ribosomal protein L7a OS=Homo sapiens GN=RPL7A PE=1 SV=2	High	High	High	High
FALSE	340	2	14	14	30	[Master Protein] 40S ribosomal protein S3 OS=Homo sapiens GN=RPS3 PE=1 SV=2	High	High	High	High
FALSE	300	1	14	14	21	[Master Protein] Neuroblast differentiation-associated protein AHNAK OS=Homo sapiens GN=AHNAK PE=1 SV=2	High	High	High	High
FALSE	37	5	14	14	18	[Master Protein] Unconventional myosin-XVIIIa OS=Homo sapiens GN=MYO18A PE=1 SV=3	Peak Found	High	Peak Found	High
FALSE	645	1	14	14	14	[Master Protein] Centromere protein F OS=Homo sapiens GN=CENPF PE=1 SV=2	Not Found	Not Found	High	Peak Found
FALSE	589	7	13	22	59	[Master Protein] Polyadenylate-binding protein 1 OS=Homo sapiens GN=PABPC1 PE=1 SV=2	High	High	High	High
FALSE	13	32	13	16	22	[Master Protein] Keratin, type II cytoskeletal 7 OS=Homo sapiens GN=KRT7 PE=1 SV=5	High	Peak Found	High	Peak Found
FALSE	370	2	13	15	38	[Master Protein] Heterogeneous nuclear ribonucleoproteins A2/B1 OS=Homo sapiens GN=HNRNPA2B1 PE=1 SV=2	High	High	High	High
FALSE	318	2	13	13	29	[Master Protein] Acetyl-CoA acetyltransferase, cytosolic OS=Homo sapiens GN=ACAT2 PE=1 SV=2	Not Found	High	Not Found	High
FALSE	323	2	13	13	27	[Master Protein] Heterogeneous nuclear ribonucleoprotein U OS=Homo sapiens GN=HNRNPU PE=1 SV=6	High	High	High	High
FALSE	614	1	13	13	17	[Master Protein] Receptor of activated protein C kinase 1 OS=Homo sapiens GN=RACK1 PE=1 SV=3	High	High	High	Peak Found
FALSE	9	2	13	13	16	[Master Protein] Vigilin OS=Homo sapiens GN=HDLBP PE=1 SV=2	Peak Found	High	Peak Found	High
FALSE	553	2	13	13	14	[Master Protein] DNA-dependent protein kinase catalytic subunit OS=Homo sapiens GN=PRKDC PE=1 SV=3	High	Peak Found	High	Peak Found
FALSE	400	2	12	13	21	[Master Protein] Splicing factor, proline- and glutamine-rich OS=Homo sapiens GN=SFPQ PE=1 SV=2	High	High	High	Peak Found
FALSE	350	2	12	12	37	[Master Protein] Glyceraldehyde-3-phosphate dehydrogenase OS=Homo sapiens GN=GAPDH PE=1 SV=3	High	High	High	High
FALSE	89	2	12	12	23	[Master Protein] Ras GTPase-activating protein-binding protein 1 OS=Homo sapiens GN=G3BP1 PE=1 SV=1	High	High	Not Found	Not Found
FALSE	543	2	12	12	20	[Master Protein] 60 kDa heat shock protein, mitochondrial OS=Homo sapiens GN=HSPD1 PE=1 SV=2	High	High	High	High
FALSE	620	1	12	12	18	[Master Protein] Glycine--tRNA ligase OS=Homo sapiens GN=GARS PE=1 SV=3	High	Peak Found	High	Peak Found
FALSE	76	4	12	12	14	[Master Protein] Isoform 4 of WD repeat-containing protein 47 OS=Homo sapiens GN=WDR47	High	Not Found	High	Peak Found
FALSE	383	7	11	13	36	[Master Protein] SWISS-PROT P04264 Tax_Id=9606 Gene_Symbol=KRT1 Keratin, type II cytoskeletal 1	High	High	High	High
FALSE	47	9	11	12	25	[Master Protein] ATP-dependent RNA helicase DDX3X OS=Homo sapiens GN=DDX3X PE=1 SV=3	High	High	High	High
FALSE	176	1	11	11	57	[Master Protein] SWISS-PROT P00761|TRYP_PIG Trypsin - Sus scrofa (Pig).	High	High	High	High
FALSE	123	1	11	11	28	[Master Protein] 60S ribosomal protein L6 OS=Homo sapiens GN=RPL6 PE=1 SV=3	High	High	High	High
FALSE	559	4	11	11	20	[Master Protein] CD109 antigen OS=Homo sapiens GN=CD109 PE=1 SV=2	High	High	Not Found	Not Found
FALSE	149	3	11	11	19	[Master Protein] Isoform 3 of Drebrin OS=Homo sapiens GN=DBN1	Peak Found	High	High	High
FALSE	532	3	11	11	18	[Master Protein] Unconventional myosin-Ib OS=Homo sapiens GN=MYO1B PE=1 SV=3	High	High	High	High
FALSE	147	1	11	11	18	[Master Protein] D-3-phosphoglycerate dehydrogenase OS=Homo sapiens GN=PHGDH PE=1 SV=4	High	High	High	High
FALSE	648	1	11	11	15	[Master Protein] Actin-related protein 2/3 complex subunit 2 OS=Homo sapiens GN=ARPC2 PE=1 SV=1	High	High	Peak Found	High
FALSE	218	3	11	11	14	[Master Protein] Spermatogenesis-associated protein 5-like protein 1 OS=Homo sapiens GN=SPATA5L1 PE=1 SV=2	Not Found	Not Found	Peak Found	High
FALSE	49	1	11	11	12	[Master Protein] Rac GTPase-activating protein 1 OS=Homo sapiens GN=RACGAP1 PE=1 SV=1	Peak Found	High	Peak Found	High
FALSE	461	9	10	20	29	[Master Protein] Alpha-actinin-4 OS=Homo sapiens GN=ACTN4 PE=1 SV=2	Peak Found	High	High	High
FALSE	639	4	10	12	38	[Master Protein] Heterogeneous nuclear ribonucleoprotein A1 OS=Homo sapiens GN=HNRNPA1 PE=1 SV=5	High	High	High	High
FALSE	111	1	10	11	14	[Master Protein] CAD protein OS=Homo sapiens GN=CAD PE=1 SV=3	High	Peak Found	High	Peak Found
FALSE	478	1	10	10	33	[Master Protein] 40S ribosomal protein S2 OS=Homo sapiens GN=RPS2 PE=1 SV=2	High	High	High	High
FALSE	229	7	10	10	29	[Master Protein] Isoform C1 of Heterogeneous nuclear ribonucleoproteins C1/C2 OS=Homo sapiens GN=HNRNPC	High	High	High	High
FALSE	488	3	10	10	28	[Master Protein] Peroxiredoxin-1 OS=Homo sapiens GN=PRDX1 PE=1 SV=1	High	High	High	High
FALSE	184	1	10	10	23	[Master Protein] 60S ribosomal protein L4 OS=Homo sapiens GN=RPL4 PE=1 SV=5	High	High	High	High
FALSE	290	2	10	10	19	[Master Protein] Isoform 2 of F-actin-capping protein subunit beta OS=Homo sapiens GN=CAPZB	High	High	High	High
FALSE	10	2	10	10	17	[Master Protein] 60S ribosomal protein L3 OS=Homo sapiens GN=RPL3 PE=1 SV=2	High	High	High	High
FALSE	408	2	10	10	15	[Master Protein] X-ray repair cross-complementing protein 6 OS=Homo sapiens GN=XRCC6 PE=1 SV=2	High	High	High	High
FALSE	536	2	9	13	26	[Master Protein] Probable ATP-dependent RNA helicase DDX5 OS=Homo sapiens GN=DDX5 PE=1 SV=1	High	High	High	High
FALSE	343	2	9	11	36	[Master Protein] RNA-binding protein FUS OS=Homo sapiens GN=FUS PE=1 SV=1	High	High	Peak Found	High
FALSE	332	1	9	9	17	[Master Protein] 40S ribosomal protein S7 OS=Homo sapiens GN=RPS7 PE=1 SV=1	High	High	High	High
FALSE	362	2	9	9	16	[Master Protein] Matrin-3 OS=Homo sapiens GN=MATR3 PE=1 SV=2	High	Peak Found	High	Peak Found
FALSE	124	15	9	9	15	[Master Protein] SWISS-PROT P13645 Tax_Id=9606 Gene_Symbol=KRT10 Keratin, type I cytoskeletal 10	High	High	High	High
FALSE	579	2	9	9	15	[Master Protein] SWISS-PROT P35527 Tax_Id=9606 Gene_Symbol=KRT9 Keratin, type I cytoskeletal 9	High	High	High	Peak Found
FALSE	558	5	9	9	15	[Master Protein] Actin-related protein 3 OS=Homo sapiens GN=ACTR3 PE=1 SV=3	High	High	High	High
FALSE	411	3	9	9	13	[Master Protein] Peptidyl-prolyl cis-trans isomerase A OS=Homo sapiens GN=PPIA PE=1 SV=2	High	High	High	High
FALSE	325	1	9	9	12	[Master Protein] L-lactate dehydrogenase B chain OS=Homo sapiens GN=LDHB PE=1 SV=2	High	Peak Found	High	Peak Found
FALSE	280	2	9	9	12	[Master Protein] Isoform 2 of Procollagen-lysine,2-oxoglutarate 5-dioxygenase 1 OS=Homo sapiens GN=PLOD1	High	Not Found	High	Not Found
FALSE	3	3	9	9	12	[Master Protein] Alstrom syndrome protein 1 OS=Homo sapiens GN=ALMS1 PE=1 SV=3	High	Not Found	High	High
FALSE	535	1	9	9	12	[Master Protein] 60S ribosomal protein L7 OS=Homo sapiens GN=RPL7 PE=1 SV=1	High	High	High	High
FALSE	208	11	9	9	10	[Master Protein] Dedicator of cytokinesis protein 7 OS=Homo sapiens GN=DOCK7 PE=1 SV=4	High	Peak Found	High	Peak Found
FALSE	118	6	9	9	10	[Master Protein] Isoform 3 of Transforming acidic coiled-coil-containing protein 2 OS=Homo sapiens GN=TACC2	Not Found	High	Not Found	High
FALSE	93	2	9	9	10	[Master Protein] Pyruvate carboxylase, mitochondrial OS=Homo sapiens GN=PC PE=1 SV=2	High	Not Found	High	Not Found
FALSE	338	2	9	9	9	[Master Protein] Kinesin-like protein KIF20A OS=Homo sapiens GN=KIF20A PE=1 SV=1	Not Found	Not Found	Peak Found	High
FALSE	457	5	8	21	42	[Master Protein] Isoform 2 of Tropomyosin alpha-3 chain OS=Homo sapiens GN=TPM3	High	High	Peak Found	High
FALSE	213	4	8	17	35	[Master Protein] Isoform 3 of Polyadenylate-binding protein 4 OS=Homo sapiens GN=PABPC4	High	High	High	High
FALSE	619	5	8	10	55	[Master Protein] Isoform Smooth muscle of Myosin light polypeptide 6 OS=Homo sapiens GN=MYL6	High	High	High	High
FALSE	597	2	8	9	17	[Master Protein] Non-POU domain-containing octamer-binding protein OS=Homo sapiens GN=NONO PE=1 SV=4	High	Peak Found	High	Peak Found
FALSE	437	2	8	8	49	[Master Protein] Calmodulin OS=Homo sapiens GN=CALM1 PE=1 SV=2	High	High	High	High
FALSE	369	8	8	8	24	[Master Protein] Isoform 3 of Coronin-1C OS=Homo sapiens GN=CORO1C	High	High	High	High
FALSE	159	6	8	8	22	[Master Protein] RNA-binding motif protein, X chromosome OS=Homo sapiens GN=RBMX PE=1 SV=3	High	High	High	High
FALSE	546	1	8	8	18	[Master Protein] 60S ribosomal protein L23a OS=Homo sapiens GN=RPL23A PE=1 SV=1	High	High	High	High
FALSE	416	1	8	8	17	[Master Protein] ATP synthase subunit beta, mitochondrial OS=Homo sapiens GN=ATP5B PE=1 SV=3	High	Peak Found	High	Peak Found
FALSE	75	1	8	8	17	[Master Protein] Neuronal pentraxin-1 OS=Homo sapiens GN=NPTX1 PE=2 SV=2	High	Peak Found	High	Peak Found
FALSE	334	4	8	8	16	[Master Protein] Isoform 2 of Elongation factor 1-delta OS=Homo sapiens GN=EEF1D	Peak Found	High	Peak Found	High
FALSE	481	1	8	8	16	[Master Protein] 40S ribosomal protein S3a OS=Homo sapiens GN=RPS3A PE=1 SV=2	High	High	High	High
FALSE	541	7	8	8	14	[Master Protein] Alpha-enolase OS=Homo sapiens GN=ENO1 PE=1 SV=2	High	Peak Found	High	High
FALSE	138	2	8	8	14	[Master Protein] Centrosomal protein of 72 kDa OS=Homo sapiens GN=CEP72 PE=1 SV=2	High	Not Found	High	Not Found
FALSE	444	4	8	8	13	[Master Protein] Bcl-2-associated transcription factor 1 OS=Homo sapiens GN=BCLAF1 PE=1 SV=2	High	High	Peak Found	High
FALSE	38	2	8	8	13	[Master Protein] Heterogeneous nuclear ribonucleoprotein A3 OS=Homo sapiens GN=HNRNPA3 PE=1 SV=2	High	High	High	High
FALSE	126	2	8	8	12	[Master Protein] Ras GTPase-activating protein-binding protein 2 OS=Homo sapiens GN=G3BP2 PE=1 SV=2	High	High	Not Found	Not Found
FALSE	220	1	8	8	12	[Master Protein] tRNA-splicing ligase RtcB homolog OS=Homo sapiens GN=RTCB PE=1 SV=1	High	High	High	Peak Found
FALSE	435	3	8	8	10	[Master Protein] Isoform 2 of Creatine kinase U-type, mitochondrial OS=Homo sapiens GN=CKMT1A	Not Found	High	Not Found	High
FALSE	328	3	8	8	10	[Master Protein] ATP-dependent RNA helicase DDX1 OS=Homo sapiens GN=DDX1 PE=1 SV=2	High	Peak Found	High	Peak Found
FALSE	642	2	8	8	8	[Master Protein] rRNA 2'-O-methyltransferase fibrillarin OS=Homo sapiens GN=FBL PE=1 SV=2	Not Found	Not Found	Peak Found	High
FALSE	572	4	7	16	77	[Master Protein] Tubulin alpha-1C chain OS=Homo sapiens GN=TUBA1C PE=1 SV=1	High	High	High	High
FALSE	409	1	7	8	18	[Master Protein] Heterogeneous nuclear ribonucleoprotein F OS=Homo sapiens GN=HNRNPF PE=1 SV=3	High	High	High	High
FALSE	598	1	7	8	16	[Master Protein] F-actin-capping protein subunit alpha-1 OS=Homo sapiens GN=CAPZA1 PE=1 SV=3	High	High	High	High
FALSE	626	4	7	8	13	[Master Protein] Isoform 2 of Heterogeneous nuclear ribonucleoprotein A/B OS=Homo sapiens GN=HNRNPAB	High	High	High	High
FALSE	61	2	7	8	10	[Master Protein] T-complex protein 1 subunit delta OS=Homo sapiens GN=CCT4 PE=1 SV=4	High	Peak Found	High	Peak Found
FALSE	390	1	7	7	27	[Master Protein] Elongation factor 1-beta OS=Homo sapiens GN=EEF1B2 PE=1 SV=3	High	High	Peak Found	High
FALSE	235	1	7	7	23	[Master Protein] TREMBL Q05B55 (Bos taurus) Similar to Ig kappa chain C region	High	High	High	High
FALSE	511	3	7	7	23	[Master Protein] Nucleophosmin OS=Homo sapiens GN=NPM1 PE=1 SV=2	High	High	Peak Found	High
FALSE	643	1	7	7	16	[Master Protein] 40S ribosomal protein S16 OS=Homo sapiens GN=RPS16 PE=1 SV=2	High	High	High	High
FALSE	653	2	7	7	16	[Master Protein] N-alpha-acetyltransferase 50 OS=Homo sapiens GN=NAA50 PE=1 SV=1	High	High	High	High
FALSE	168	1	7	7	14	[Master Protein] 40S ribosomal protein S8 OS=Homo sapiens GN=RPS8 PE=1 SV=2	High	High	High	High
FALSE	547	2	7	7	14	[Master Protein] Heterogeneous nuclear ribonucleoprotein M OS=Homo sapiens GN=HNRNPM PE=1 SV=3	High	High	High	High
FALSE	345	7	7	7	13	[Master Protein] Isoform 7 of Interleukin enhancer-binding factor 3 OS=Homo sapiens GN=ILF3	High	High	High	High
FALSE	205	2	7	7	13	[Master Protein] SWISS-PROT Q2UVX4 (Bos taurus) Complement C3 precursor	High	High	Peak Found	High
FALSE	260	1	7	7	13	[Master Protein] 40S ribosomal protein S11 OS=Homo sapiens GN=RPS11 PE=1 SV=3	High	High	High	High
FALSE	156	1	7	7	13	[Master Protein] 40S ribosomal protein S13 OS=Homo sapiens GN=RPS13 PE=1 SV=2	High	High	High	High
FALSE	434	2	7	7	12	[Master Protein] DnaJ homolog subfamily A member 1 OS=Homo sapiens GN=DNAJA1 PE=1 SV=2	High	Peak Found	High	Peak Found
FALSE	627	2	7	7	12	[Master Protein] Polymerase I and transcript release factor OS=Homo sapiens GN=PTRF PE=1 SV=1	High	Peak Found	High	Peak Found
FALSE	15	3	7	7	10	[Master Protein] Isoform 3 of Echinoderm microtubule-associated protein-like 2 OS=Homo sapiens GN=EML2	High	Not Found	High	Not Found
FALSE	473	1	7	7	9	[Master Protein] Elongation factor 2 OS=Homo sapiens GN=EEF2 PE=1 SV=4	High	High	High	Peak Found
FALSE	538	3	7	7	9	[Master Protein] Actin-related protein 2/3 complex subunit 1B OS=Homo sapiens GN=ARPC1B PE=1 SV=3	High	High	Peak Found	High
FALSE	23	6	7	7	9	[Master Protein] Isoform 3 of Caldesmon OS=Homo sapiens GN=CALD1	Peak Found	High	Peak Found	High
FALSE	57	4	7	7	8	[Master Protein] Deoxynucleoside triphosphate triphosphohydrolase SAMHD1 OS=Homo sapiens GN=SAMHD1 PE=1 SV=2	Peak Found	High	Not Found	Not Found
FALSE	453	1	7	7	7	[Master Protein] Sperm-associated antigen 5 OS=Homo sapiens GN=SPAG5 PE=1 SV=2	High	Not Found	High	Not Found
FALSE	646	2	6	25	53	[Master Protein] Isoform 2 of Tropomyosin beta chain OS=Homo sapiens GN=TPM2	Not Found	High	Not Found	High
FALSE	336	2	6	18	39	[Master Protein] Tropomyosin alpha-4 chain OS=Homo sapiens GN=TPM4 PE=1 SV=3	Peak Found	High	Peak Found	High
FALSE	667	5	6	15	69	[Master Protein] Tubulin alpha-4A chain OS=Homo sapiens GN=TUBA4A PE=1 SV=1	High	High	High	Peak Found
FALSE	291	2	6	12	39	[Master Protein] Heterogeneous nuclear ribonucleoprotein H OS=Homo sapiens GN=HNRNPH1 PE=1 SV=4	High	Peak Found	High	High
FALSE	622	1	6	8	20	[Master Protein] Myosin light chain 6B OS=Homo sapiens GN=MYL6B PE=1 SV=1	High	High	Not Found	High
FALSE	494	3	6	8	14	[Master Protein] Heterogeneous nuclear ribonucleoprotein D-like OS=Homo sapiens GN=HNRNPDL PE=1 SV=3	High	High	Not Found	Not Found
FALSE	565	1	6	8	13	[Master Protein] EF-hand domain-containing protein D2 OS=Homo sapiens GN=EFHD2 PE=1 SV=1	Peak Found	High	Peak Found	High
FALSE	610	2	6	7	8	[Master Protein] T-complex protein 1 subunit epsilon OS=Homo sapiens GN=CCT5 PE=1 SV=1	High	Peak Found	High	Peak Found
FALSE	65	1	6	6	19	[Master Protein] Galectin-1 OS=Homo sapiens GN=LGALS1 PE=1 SV=2	High	High	High	High
FALSE	217	1	6	6	19	[Master Protein] 60S ribosomal protein L23 OS=Homo sapiens GN=RPL23 PE=1 SV=1	High	High	High	High
FALSE	310	2	6	6	18	[Master Protein] 60S ribosomal protein L18 OS=Homo sapiens GN=RPL18 PE=1 SV=2	High	High	High	High
FALSE	60	1	6	6	17	[Master Protein] UPF0568 protein C14orf166 OS=Homo sapiens GN=C14orf166 PE=1 SV=1	High	High	High	High
FALSE	29	2	6	6	16	[Master Protein] 60S ribosomal protein L12 OS=Homo sapiens GN=RPL12 PE=1 SV=1	High	High	High	High
FALSE	454	1	6	6	16	[Master Protein] 60S ribosomal protein L24 OS=Homo sapiens GN=RPL24 PE=1 SV=1	High	High	High	High
FALSE	427	1	6	6	15	[Master Protein] THO complex subunit 4 OS=Homo sapiens GN=ALYREF PE=1 SV=3	High	High	High	High
FALSE	12	2	6	6	14	[Master Protein] 60S ribosomal protein L13 OS=Homo sapiens GN=RPL13 PE=1 SV=4	High	High	High	High
FALSE	97	1	6	6	13	[Master Protein] 60S ribosomal protein L10a OS=Homo sapiens GN=RPL10A PE=1 SV=2	High	High	High	High
FALSE	441	3	6	6	13	[Master Protein] 40S ribosomal protein S4, X isoform OS=Homo sapiens GN=RPS4X PE=1 SV=2	High	High	High	Peak Found
FALSE	202	8	6	6	12	[Master Protein] Isoform Non-brain of Clathrin light chain A OS=Homo sapiens GN=CLTA	High	High	Peak Found	High
FALSE	200	1	6	6	12	[Master Protein] 40S ribosomal protein S6 OS=Homo sapiens GN=RPS6 PE=1 SV=1	High	High	High	High
FALSE	499	3	6	6	11	[Master Protein] Isoform 3 of 60S ribosomal protein L17 OS=Homo sapiens GN=RPL17	High	High	High	High
FALSE	313	3	6	6	11	[Master Protein] Isoform 2 of Annexin A2 OS=Homo sapiens GN=ANXA2	High	High	High	High
FALSE	264	5	6	6	10	[Master Protein] Leucine-rich repeat flightless-interacting protein 2 OS=Homo sapiens GN=LRRFIP2 PE=1 SV=1	High	High	Peak Found	High
FALSE	505	1	6	6	10	[Master Protein] Proliferating cell nuclear antigen OS=Homo sapiens GN=PCNA PE=1 SV=1	High	Peak Found	High	Peak Found
FALSE	462	5	6	6	10	[Master Protein] Isoform 5 of Protein transport protein Sec16A OS=Homo sapiens GN=SEC16A	High	High	High	High
FALSE	20	1	6	6	10	[Master Protein] Probable ATP-dependent RNA helicase DDX6 OS=Homo sapiens GN=DDX6 PE=1 SV=2	High	High	High	Peak Found
FALSE	659	1	6	6	9	[Master Protein] 60S ribosomal protein L27a OS=Homo sapiens GN=RPL27A PE=1 SV=2	High	High	High	High
FALSE	185	1	6	6	8	[Master Protein] T-complex protein 1 subunit alpha OS=Homo sapiens GN=TCP1 PE=1 SV=1	High	Peak Found	High	Peak Found
FALSE	578	1	6	6	8	[Master Protein] Serpin H1 OS=Homo sapiens GN=SERPINH1 PE=1 SV=2	High	Peak Found	High	Peak Found
FALSE	502	4	6	6	8	[Master Protein] Ataxin-2 OS=Homo sapiens GN=ATXN2 PE=1 SV=2	High	Not Found	High	Not Found
FALSE	658	1	6	6	7	[Master Protein] Galectin-3-binding protein OS=Homo sapiens GN=LGALS3BP PE=1 SV=1	High	Peak Found	High	Peak Found
FALSE	348	6	6	6	7	[Master Protein] Prelamin-A/C OS=Homo sapiens GN=LMNA PE=1 SV=1	High	High	High	Peak Found
FALSE	406	3	6	6	7	[Master Protein] Kinesin-like protein KIF23 OS=Homo sapiens GN=KIF23 PE=1 SV=3	Not Found	High	Peak Found	High
FALSE	249	2	6	6	6	[Master Protein] Transcription intermediary factor 1-beta OS=Homo sapiens GN=TRIM28 PE=1 SV=5	High	Peak Found	High	Not Found
FALSE	602	4	6	6	6	[Master Protein] Isoform 2 of Ankycorbin OS=Homo sapiens GN=RAI14	High	High	Not Found	Not Found
FALSE	500	1	6	6	6	[Master Protein] Nicotinamide phosphoribosyltransferase OS=Homo sapiens GN=NAMPT PE=1 SV=1	High	Peak Found	High	Not Found
FALSE	195	4	6	6	6	[Master Protein] Supervillin OS=Homo sapiens GN=SVIL PE=1 SV=2	Peak Found	High	Not Found	Not Found
FALSE	566	4	5	23	93	[Master Protein] Tubulin beta chain OS=Homo sapiens GN=TUBB PE=1 SV=2	High	High	High	High
FALSE	311	5	5	10	12	[Master Protein] Heterogeneous nuclear ribonucleoprotein Q OS=Homo sapiens GN=SYNCRIP PE=1 SV=2	High	High	High	High
FALSE	239	2	5	9	19	[Master Protein] ADP/ATP translocase 2 OS=Homo sapiens GN=SLC25A5 PE=1 SV=7	High	High	High	Peak Found
FALSE	418	5	5	7	20	[Master Protein] Histone H1.3 OS=Homo sapiens GN=HIST1H1D PE=1 SV=2	High	High	High	High
FALSE	485	4	5	7	12	[Master Protein] Heterogeneous nuclear ribonucleoprotein D0 OS=Homo sapiens GN=HNRNPD PE=1 SV=1	High	High	Not Found	Not Found
FALSE	469	1	5	5	44	[Master Protein] TREMBL Q1RMN8 (Bos taurus) Similar to Immunoglobulin lambda-like polypeptide 1	High	High	High	High
FALSE	63	1	5	5	18	[Master Protein] Single-stranded DNA-binding protein, mitochondrial OS=Homo sapiens GN=SSBP1 PE=1 SV=1	High	High	High	High
FALSE	365	16	5	5	17	[Master Protein] Isoform 2 of Histone H2B type 2-F OS=Homo sapiens GN=HIST2H2BF	High	High	High	High
FALSE	376	1	5	5	15	[Master Protein] 60S ribosomal protein L27 OS=Homo sapiens GN=RPL27 PE=1 SV=2	High	High	High	High
FALSE	552	1	5	5	14	[Master Protein] 40S ribosomal protein S12 OS=Homo sapiens GN=RPS12 PE=1 SV=3	High	High	High	High
FALSE	388	1	5	5	12	[Master Protein] Histone H4 OS=Homo sapiens GN=HIST1H4A PE=1 SV=2	High	High	High	High
FALSE	493	1	5	5	11	[Master Protein] 40S ribosomal protein S9 OS=Homo sapiens GN=RPS9 PE=1 SV=3	High	High	High	High
FALSE	116	2	5	5	10	[Master Protein] Probable ATP-dependent RNA helicase DDX20 OS=Homo sapiens GN=DDX20 PE=1 SV=2	High	High	High	High
FALSE	166	1	5	5	9	[Master Protein] 60S ribosomal protein L8 OS=Homo sapiens GN=RPL8 PE=1 SV=2	High	High	High	High
FALSE	191	1	5	5	9	[Master Protein] Elongation factor Tu, mitochondrial OS=Homo sapiens GN=TUFM PE=1 SV=2	High	High	High	High
FALSE	545	2	5	5	8	[Master Protein] Serine/threonine-protein phosphatase PGAM5, mitochondrial OS=Homo sapiens GN=PGAM5 PE=1 SV=2	High	High	High	High
FALSE	592	1	5	5	7	[Master Protein] ATP-dependent RNA helicase A OS=Homo sapiens GN=DHX9 PE=1 SV=4	High	High	High	Peak Found
FALSE	145	2	5	5	7	[Master Protein] Caprin-1 OS=Homo sapiens GN=CAPRIN1 PE=1 SV=2	High	Peak Found	High	Peak Found
FALSE	7	4	5	5	6	[Master Protein] Isoform 2 of Nexilin OS=Homo sapiens GN=NEXN	High	High	High	High
FALSE	460	1	5	5	6	[Master Protein] PDZ domain-containing protein 8 OS=Homo sapiens GN=PDZD8 PE=1 SV=1	Not Found	High	Not Found	High
FALSE	248	2	5	5	6	[Master Protein] Actin-related protein 2 OS=Homo sapiens GN=ACTR2 PE=1 SV=1	High	High	High	High
FALSE	297	1	5	5	6	[Master Protein] Exportin-1 OS=Homo sapiens GN=XPO1 PE=1 SV=1	High	Not Found	High	Not Found
FALSE	100	1	5	5	5	[Master Protein] Nuclear fragile X mental retardation-interacting protein 2 OS=Homo sapiens GN=NUFIP2 PE=1 SV=1	High	Peak Found	Not Found	Not Found
FALSE	103	9	5	5	5	[Master Protein] Isoform 3 of Ataxin-2-like protein OS=Homo sapiens GN=ATXN2L	High	Peak Found	Not Found	Not Found
FALSE	569	6	5	5	5	[Master Protein] Isoform 4 of Kinesin-like protein KIF21A OS=Homo sapiens GN=KIF21A	Not Found	Not Found	High	Not Found
FALSE	132	2	5	5	5	[Master Protein] Isoform 2 of TATA element modulatory factor OS=Homo sapiens GN=TMF1	High	Not Found	High	Not Found
FALSE	587	2	5	5	5	[Master Protein] T-complex protein 1 subunit gamma OS=Homo sapiens GN=CCT3 PE=1 SV=4	High	Peak Found	High	Peak Found
FALSE	281	1	4	18	99	[Master Protein] ENSBTAP00000024462 (Bos taurus) 47 kDa protein	High	High	High	High
FALSE	372	7	4	14	22	[Master Protein] Isoform 4 of Alpha-actinin-1 OS=Homo sapiens GN=ACTN1	Not Found	High	Peak Found	High
FALSE	594	2	4	9	20	[Master Protein] Heterogeneous nuclear ribonucleoprotein H2 OS=Homo sapiens GN=HNRNPH2 PE=1 SV=1	High	Not Found	High	Peak Found
FALSE	69	3	4	8	45	[Master Protein] SWISS-PROT P02768-1 Tax_Id=9606 Gene_Symbol=ALB Isoform 1 of Serum albumin precursor	High	High	High	High
FALSE	267	1	4	7	13	[Master Protein] Cofilin-1 OS=Homo sapiens GN=CFL1 PE=1 SV=3	High	High	High	Peak Found
FALSE	257	2	4	7	9	[Master Protein] Guanine nucleotide-binding protein G(I)/G(S)/G(T) subunit beta-1 OS=Homo sapiens GN=GNB1 PE=1 SV=3	High	Peak Found	Not Found	Not Found
FALSE	189	1	4	6	16	[Master Protein] Histone H1.5 OS=Homo sapiens GN=HIST1H1B PE=1 SV=3	High	High	High	High
FALSE	307	3	4	6	11	[Master Protein] Alpha-2-macroglobulin OS=Homo sapiens GN=A2M PE=1 SV=3	Not Found	High	High	High
FALSE	261	4	4	5	8	[Master Protein] Eukaryotic initiation factor 4A-I OS=Homo sapiens GN=EIF4A1 PE=1 SV=1	Not Found	Not Found	High	Peak Found
FALSE	34	2	4	5	7	[Master Protein] Insulin-like growth factor 2 mRNA-binding protein 1 OS=Homo sapiens GN=IGF2BP1 PE=1 SV=2	High	Peak Found	Not Found	Not Found
FALSE	632	1	4	4	13	[Master Protein] 60S acidic ribosomal protein P2 OS=Homo sapiens GN=RPLP2 PE=1 SV=1	High	High	High	High
FALSE	263	3	4	4	13	[Master Protein] Isoform 2 of Heterogeneous nuclear ribonucleoprotein K OS=Homo sapiens GN=HNRNPK	High	High	High	High
FALSE	67	1	4	4	13	[Master Protein] 60S ribosomal protein L14 OS=Homo sapiens GN=RPL14 PE=1 SV=4	High	High	High	High
FALSE	368	1	4	4	12	[Master Protein] 60S ribosomal protein L38 OS=Homo sapiens GN=RPL38 PE=1 SV=2	High	High	High	High
FALSE	212	1	4	4	11	[Master Protein] 40S ribosomal protein S15 OS=Homo sapiens GN=RPS15 PE=1 SV=2	High	High	High	High
FALSE	609	1	4	4	11	[Master Protein] 40S ribosomal protein S17 OS=Homo sapiens GN=RPS17 PE=1 SV=2	High	High	High	High
FALSE	188	1	4	4	10	[Master Protein] 40S ribosomal protein S18 OS=Homo sapiens GN=RPS18 PE=1 SV=3	High	High	High	High
FALSE	163	1	4	4	10	[Master Protein] 60S ribosomal protein L36 OS=Homo sapiens GN=RPL36 PE=1 SV=3	High	High	High	High
FALSE	405	1	4	4	9	[Master Protein] 60S ribosomal protein L32 OS=Homo sapiens GN=RPL32 PE=1 SV=2	High	Peak Found	High	High
FALSE	593	2	4	4	9	[Master Protein] Dynein light chain 1, cytoplasmic OS=Homo sapiens GN=DYNLL1 PE=1 SV=1	High	High	High	High
FALSE	286	1	4	4	9	[Master Protein] ENSBTAP00000014147 (Bos taurus) 12 kDa protein	High	Peak Found	High	High
FALSE	396	1	4	4	9	[Master Protein] 60S ribosomal protein L30 OS=Homo sapiens GN=RPL30 PE=1 SV=2	High	High	High	High
FALSE	555	3	4	4	8	[Master Protein] Spectrin beta chain, non-erythrocytic 1 OS=Homo sapiens GN=SPTBN1 PE=1 SV=2	Peak Found	High	High	High
FALSE	647	1	4	4	8	[Master Protein] Protein deglycase DJ-1 OS=Homo sapiens GN=PARK7 PE=1 SV=2	High	High	High	High
FALSE	133	1	4	4	8	[Master Protein] 60S ribosomal protein L35 OS=Homo sapiens GN=RPL35 PE=1 SV=2	High	High	Peak Found	High
FALSE	413	1	4	4	7	[Master Protein] 60S ribosomal protein L22 OS=Homo sapiens GN=RPL22 PE=1 SV=2	High	High	High	High
FALSE	637	2	4	4	7	[Master Protein] CTP synthase 1 OS=Homo sapiens GN=CTPS1 PE=1 SV=2	High	Peak Found	High	Peak Found
FALSE	19	3	4	4	7	[Master Protein] U1 small nuclear ribonucleoprotein 70 kDa OS=Homo sapiens GN=SNRNP70 PE=1 SV=2	High	Peak Found	High	High
FALSE	410	2	4	4	7	[Master Protein] Isoform 2 of Protein-L-isoaspartate(D-aspartate) O-methyltransferase OS=Homo sapiens GN=PCMT1	Peak Found	High	High	High
FALSE	179	2	4	4	7	[Master Protein] BAG family molecular chaperone regulator 2 OS=Homo sapiens GN=BAG2 PE=1 SV=1	High	High	High	Peak Found
FALSE	110	2	4	4	7	[Master Protein] ATP-binding cassette sub-family D member 3 OS=Homo sapiens GN=ABCD3 PE=1 SV=1	High	Peak Found	High	Peak Found
FALSE	430	5	4	4	6	[Master Protein] 2-oxoglutarate dehydrogenase, mitochondrial OS=Homo sapiens GN=OGDH PE=1 SV=3	Peak Found	High	Peak Found	High
FALSE	515	1	4	4	6	[Master Protein] Isoleucine--tRNA ligase, cytoplasmic OS=Homo sapiens GN=IARS PE=1 SV=2	High	Peak Found	High	Peak Found
FALSE	16	1	4	4	6	[Master Protein] X-ray repair cross-complementing protein 5 OS=Homo sapiens GN=XRCC5 PE=1 SV=3	High	High	Peak Found	High
FALSE	527	2	4	4	6	[Master Protein] 60S ribosomal protein L15 OS=Homo sapiens GN=RPL15 PE=1 SV=2	High	High	High	High
FALSE	292	2	4	4	5	[Master Protein] Thioredoxin-dependent peroxide reductase, mitochondrial OS=Homo sapiens GN=PRDX3 PE=1 SV=3	High	Peak Found	High	Not Found
FALSE	526	2	4	4	5	[Master Protein] Serine/arginine-rich splicing factor 3 OS=Homo sapiens GN=SRSF3 PE=1 SV=1	High	Peak Found	Peak Found	High
FALSE	148	5	4	4	5	[Master Protein] Isoform 2 of ATPase family AAA domain-containing protein 3A OS=Homo sapiens GN=ATAD3A	High	Peak Found	High	Peak Found
FALSE	98	1	4	4	5	[Master Protein] Fatty acid synthase OS=Homo sapiens GN=FASN PE=1 SV=3	High	Peak Found	High	Not Found
FALSE	94	1	4	4	5	[Master Protein] Heat shock protein beta-1 OS=Homo sapiens GN=HSPB1 PE=1 SV=2	High	Peak Found	High	Peak Found
FALSE	327	1	4	4	5	[Master Protein] Activated RNA polymerase II transcriptional coactivator p15 OS=Homo sapiens GN=SUB1 PE=1 SV=3	High	Peak Found	High	Not Found
FALSE	64	4	4	4	5	[Master Protein] CDK5 regulatory subunit-associated protein 2 OS=Homo sapiens GN=CDK5RAP2 PE=1 SV=5	High	Not Found	High	Not Found
FALSE	615	4	4	4	5	[Master Protein] Isoform 4 of 4F2 cell-surface antigen heavy chain OS=Homo sapiens GN=SLC3A2	High	Peak Found	High	Peak Found
FALSE	40	5	4	4	4	[Master Protein] Protein phosphatase 1 regulatory subunit 12A OS=Homo sapiens GN=PPP1R12A PE=1 SV=1	High	High	Not Found	Not Found
FALSE	22	3	4	4	4	[Master Protein] 60S acidic ribosomal protein P0 OS=Homo sapiens GN=RPLP0 PE=1 SV=1	High	Peak Found	High	Peak Found
FALSE	73	2	4	4	4	[Master Protein] Methionine--tRNA ligase, cytoplasmic OS=Homo sapiens GN=MARS PE=1 SV=2	High	Peak Found	High	Peak Found
FALSE	143	3	4	4	4	[Master Protein] tRNA (cytosine(34)-C(5))-methyltransferase OS=Homo sapiens GN=NSUN2 PE=1 SV=2	High	Peak Found	High	Peak Found
FALSE	544	4	4	4	4	[Master Protein] Probable ubiquitin carboxyl-terminal hydrolase FAF-X OS=Homo sapiens GN=USP9X PE=1 SV=3	High	Not Found	High	Not Found
FALSE	222	2	4	4	4	[Master Protein] Tubulin gamma-1 chain OS=Homo sapiens GN=TUBG1 PE=1 SV=2	High	Not Found	High	Peak Found
FALSE	374	6	4	4	4	[Master Protein] Isoform 6 of Unconventional myosin-VI OS=Homo sapiens GN=MYO6	Peak Found	High	Not Found	Not Found
FALSE	471	5	4	4	4	[Master Protein] Isoform 2 of Spliceosome RNA helicase DDX39B OS=Homo sapiens GN=DDX39B	High	High	High	Peak Found
FALSE	548	2	4	4	4	[Master Protein] Pachytene checkpoint protein 2 homolog OS=Homo sapiens GN=TRIP13 PE=1 SV=2	High	Peak Found	High	Not Found
FALSE	576	5	3	23	85	[Master Protein] Tubulin beta-4B chain OS=Homo sapiens GN=TUBB4B PE=1 SV=1	High	High	High	High
FALSE	562	1	3	23	50	[Master Protein] Tropomyosin beta chain OS=Homo sapiens GN=TPM2 PE=1 SV=1	Peak Found	High	Not Found	High
FALSE	182	4	3	23	45	[Master Protein] Isoform 10 of Tropomyosin alpha-1 chain OS=Homo sapiens GN=TPM1	Peak Found	High	Not Found	Not Found
FALSE	414	1	3	17	104	[Master Protein] ENSBTAP00000024466 (Bos taurus) 44 kDa protein	High	High	High	High
FALSE	270	3	3	8	26	[Master Protein] Tubulin beta-6 chain OS=Homo sapiens GN=TUBB6 PE=1 SV=1	High	High	High	Peak Found
FALSE	62	3	3	7	18	[Master Protein] ADP/ATP translocase 3 OS=Homo sapiens GN=SLC25A6 PE=1 SV=4	High	High	High	High
FALSE	403	4	3	7	15	[Master Protein] Probable ATP-dependent RNA helicase DDX17 OS=Homo sapiens GN=DDX17 PE=1 SV=2	High	Peak Found	High	Peak Found
FALSE	636	2	3	7	8	[Master Protein] Guanine nucleotide-binding protein G(I)/G(S)/G(T) subunit beta-2 OS=Homo sapiens GN=GNB2 PE=1 SV=3	High	High	Not Found	Not Found
FALSE	472	2	3	5	13	[Master Protein] TATA-binding protein-associated factor 2N OS=Homo sapiens GN=TAF15 PE=1 SV=1	High	High	Not Found	Not Found
FALSE	652	15	3	5	10	[Master Protein] Isoform 2 of Poly(rC)-binding protein 2 OS=Homo sapiens GN=PCBP2	High	Peak Found	High	High
FALSE	486	2	3	5	9	[Master Protein] EF-hand domain-containing protein D1 OS=Homo sapiens GN=EFHD1 PE=1 SV=1	Peak Found	High	High	High
FALSE	347	3	3	5	7	[Master Protein] Poly(rC)-binding protein 1 OS=Homo sapiens GN=PCBP1 PE=1 SV=2	High	Peak Found	High	Peak Found
FALSE	675	6	3	4	14	[Master Protein] Histone H2A type 2-A OS=Homo sapiens GN=HIST2H2AA3 PE=1 SV=3	High	High	High	High
FALSE	357	2	3	4	5	[Master Protein] Isoform 2 of Calcium-binding mitochondrial carrier protein Aralar2 OS=Homo sapiens GN=SLC25A13	High	Not Found	High	Not Found
FALSE	575	4	3	3	25	[Master Protein] Ig gamma-3 chain C region OS=Homo sapiens GN=IGHG3 PE=1 SV=2	High	High	High	High
FALSE	326	4	3	3	12	[Master Protein] Isoform 4 of 40S ribosomal protein S24 OS=Homo sapiens GN=RPS24	High	High	High	High
FALSE	412	1	3	3	11	[Master Protein] 60S ribosomal protein L21 OS=Homo sapiens GN=RPL21 PE=1 SV=2	High	High	High	High
FALSE	482	2	3	3	10	[Master Protein] 60S ribosomal protein L26 OS=Homo sapiens GN=RPL26 PE=1 SV=1	High	High	High	High
FALSE	446	1	3	3	10	[Master Protein] 40S ribosomal protein S14 OS=Homo sapiens GN=RPS14 PE=1 SV=3	High	High	High	High
FALSE	360	2	3	3	8	[Master Protein] 60S ribosomal protein L11 OS=Homo sapiens GN=RPL11 PE=1 SV=2	High	Peak Found	High	High
FALSE	510	5	3	3	8	[Master Protein] Complement C4-A OS=Homo sapiens GN=C4A PE=1 SV=2	High	High	High	High
FALSE	361	1	3	3	8	[Master Protein] 40S ribosomal protein S23 OS=Homo sapiens GN=RPS23 PE=1 SV=3	High	High	High	High
FALSE	232	1	3	3	8	[Master Protein] Guanine nucleotide-binding protein G(I)/G(S)/G(O) subunit gamma-12 OS=Homo sapiens GN=GNG12 PE=1 SV=3	High	High	High	Not Found
FALSE	134	4	3	3	8	[Master Protein] Serine/arginine-rich splicing factor 7 OS=Homo sapiens GN=SRSF7 PE=1 SV=1	High	High	High	High
FALSE	68	2	3	3	7	[Master Protein] Isoform 2 of 40S ribosomal protein S20 OS=Homo sapiens GN=RPS20	High	High	High	High
FALSE	654	4	3	3	7	[Master Protein] Ras GTPase-activating-like protein IQGAP1 OS=Homo sapiens GN=IQGAP1 PE=1 SV=1	Not Found	Not Found	High	High
FALSE	463	3	3	3	7	[Master Protein] Isoform 3 of Polypyrimidine tract-binding protein 1 OS=Homo sapiens GN=PTBP1	High	High	High	High
FALSE	375	1	3	3	7	[Master Protein] Histidine-rich glycoprotein OS=Homo sapiens GN=HRG PE=1 SV=1	High	High	High	High
FALSE	470	2	3	3	7	[Master Protein] 40S ribosomal protein S26 OS=Homo sapiens GN=RPS26 PE=1 SV=3	High	High	High	High
FALSE	319	3	3	3	6	[Master Protein] DNA replication licensing factor MCM7 OS=Homo sapiens GN=MCM7 PE=1 SV=4	High	Peak Found	High	Peak Found
FALSE	309	3	3	3	6	[Master Protein] High mobility group protein HMG-I/HMG-Y OS=Homo sapiens GN=HMGA1 PE=1 SV=3	Peak Found	High	Peak Found	High
FALSE	306	1	3	3	6	[Master Protein] 60S ribosomal protein L9 OS=Homo sapiens GN=RPL9 PE=1 SV=1	High	High	Peak Found	High
FALSE	450	1	3	3	6	[Master Protein] 40S ribosomal protein S25 OS=Homo sapiens GN=RPS25 PE=1 SV=1	High	High	High	High
FALSE	477	1	3	3	6	[Master Protein] N-acetylglucosamine-1-phosphotransferase subunit gamma OS=Homo sapiens GN=GNPTG PE=1 SV=1	High	Not Found	High	Not Found
FALSE	1	11	3	3	6	[Master Protein] 14-3-3 protein zeta/delta OS=Homo sapiens GN=YWHAZ PE=1 SV=1	High	High	High	High
FALSE	231	4	3	3	6	[Master Protein] Plasminogen activator inhibitor 1 RNA-binding protein OS=Homo sapiens GN=SERBP1 PE=1 SV=2	High	Peak Found	High	High
FALSE	99	1	3	3	6	[Master Protein] Heterogeneous nuclear ribonucleoprotein A0 OS=Homo sapiens GN=HNRNPA0 PE=1 SV=1	High	High	High	Peak Found
FALSE	71	3	3	3	6	[Master Protein] DnaJ homolog subfamily A member 3, mitochondrial OS=Homo sapiens GN=DNAJA3 PE=1 SV=2	High	Peak Found	High	Peak Found
FALSE	285	2	3	3	6	[Master Protein] 60S ribosomal protein L13a OS=Homo sapiens GN=RPL13A PE=1 SV=2	High	High	High	High
FALSE	630	1	3	3	5	[Master Protein] TREMBL Q1RMK2 (Bos taurus) IGHM protein	High	Peak Found	High	High
FALSE	262	3	3	3	5	[Master Protein] Fragile X mental retardation syndrome-related protein 1 OS=Homo sapiens GN=FXR1 PE=1 SV=3	High	High	Peak Found	High
FALSE	293	5	3	3	5	[Master Protein] AP-2 complex subunit alpha-1 OS=Homo sapiens GN=AP2A1 PE=1 SV=3	High	High	Not Found	Not Found
FALSE	384	1	3	3	5	[Master Protein] Barrier-to-autointegration factor OS=Homo sapiens GN=BANF1 PE=1 SV=1	High	High	Not Found	High
FALSE	164	1	3	3	5	[Master Protein] Importin subunit alpha-1 OS=Homo sapiens GN=KPNA2 PE=1 SV=1	High	Peak Found	High	Peak Found
FALSE	335	2	3	3	5	[Master Protein] Isoform B of Phosphate carrier protein, mitochondrial OS=Homo sapiens GN=SLC25A3	High	Peak Found	High	Peak Found
FALSE	600	1	3	3	5	[Master Protein] 40S ribosomal protein S15a OS=Homo sapiens GN=RPS15A PE=1 SV=2	High	Peak Found	High	Peak Found
FALSE	601	2	3	3	5	[Master Protein] Isoform 2 of ELAV-like protein 1 OS=Homo sapiens GN=ELAVL1	High	Peak Found	High	Not Found
FALSE	401	2	3	3	5	[Master Protein] S-phase kinase-associated protein 1 OS=Homo sapiens GN=SKP1 PE=1 SV=2	High	Peak Found	High	Not Found
FALSE	158	2	3	3	5	[Master Protein] Cyclin-dependent kinase 1 OS=Homo sapiens GN=CDK1 PE=1 SV=3	High	Peak Found	High	Peak Found
FALSE	433	2	3	3	4	[Master Protein] 3-hydroxyacyl-CoA dehydrogenase type-2 OS=Homo sapiens GN=HSD17B10 PE=1 SV=3	High	Peak Found	High	Not Found
FALSE	226	2	3	3	4	[Master Protein] Zinc finger protein RFP OS=Homo sapiens GN=TRIM27 PE=1 SV=1	High	Not Found	High	Not Found
FALSE	216	7	3	3	4	[Master Protein] Hemoglobin subunit beta OS=Homo sapiens GN=HBB PE=1 SV=2	High	Peak Found	High	Peak Found
FALSE	364	4	3	3	4	[Master Protein] Pre-mRNA 3'-end-processing factor FIP1 OS=Homo sapiens GN=FIP1L1 PE=1 SV=1	Not Found	Not Found	High	Peak Found
FALSE	204	2	3	3	4	[Master Protein] 60S ribosomal protein L10 OS=Homo sapiens GN=RPL10 PE=1 SV=4	High	Peak Found	High	High
FALSE	439	2	3	3	4	[Master Protein] Isoform 2 of Serine-threonine kinase receptor-associated protein OS=Homo sapiens GN=STRAP	High	Peak Found	High	Peak Found
FALSE	455	2	3	3	4	[Master Protein] Isoform 2 of Aminoacyl tRNA synthase complex-interacting multifunctional protein 1 OS=Homo sapiens GN=AIMP1	High	Peak Found	High	Peak Found
FALSE	79	7	3	3	4	[Master Protein] Isoform 2 of AP-2 complex subunit beta OS=Homo sapiens GN=AP2B1	High	High	Not Found	Not Found
FALSE	468	4	3	3	4	[Master Protein] Casein kinase I isoform alpha OS=Homo sapiens GN=CSNK1A1 PE=1 SV=2	Peak Found	High	Peak Found	High
FALSE	77	1	3	3	4	[Master Protein] Nucleolar protein 58 OS=Homo sapiens GN=NOP58 PE=1 SV=1	Not Found	Not Found	High	High
FALSE	120	1	3	3	4	[Master Protein] 40S ribosomal protein S10 OS=Homo sapiens GN=RPS10 PE=1 SV=1	High	Peak Found	High	Peak Found
FALSE	46	2	3	3	4	[Master Protein] Nucleolar RNA helicase 2 OS=Homo sapiens GN=DDX21 PE=1 SV=5	High	Peak Found	High	High
FALSE	595	2	3	3	4	[Master Protein] Bifunctional methylenetetrahydrofolate dehydrogenase/cyclohydrolase, mitochondrial OS=Homo sapiens GN=MTHFD2 PE=1 SV=2	High	Peak Found	High	Peak Found
FALSE	6	1	3	3	4	[Master Protein] DnaJ homolog subfamily B member 11 OS=Homo sapiens GN=DNAJB11 PE=1 SV=1	High	Not Found	High	Not Found
FALSE	175	4	3	3	3	[Master Protein] Isoform 4 of Magnesium transporter MRS2 homolog, mitochondrial OS=Homo sapiens GN=MRS2	High	Not Found	High	Not Found
FALSE	237	3	3	3	3	[Master Protein] Protein flightless-1 homolog OS=Homo sapiens GN=FLII PE=1 SV=2	Peak Found	High	Peak Found	High
FALSE	91	6	3	3	3	[Master Protein] Isoform 5 of RNA-binding protein EWS OS=Homo sapiens GN=EWSR1	High	Peak Found	Not Found	Not Found
FALSE	381	1	3	3	3	[Master Protein] Replication protein A 70 kDa DNA-binding subunit OS=Homo sapiens GN=RPA1 PE=1 SV=2	Peak Found	High	Not Found	Not Found
FALSE	606	1	3	3	3	[Master Protein] Transferrin receptor protein 1 OS=Homo sapiens GN=TFRC PE=1 SV=2	High	Peak Found	High	Not Found
FALSE	607	1	3	3	3	[Master Protein] PRKC apoptosis WT1 regulator protein OS=Homo sapiens GN=PAWR PE=1 SV=1	Peak Found	High	Not Found	Not Found
FALSE	423	30	3	3	3	[Master Protein] Isoform 6 of Calcium/calmodulin-dependent protein kinase type II subunit gamma OS=Homo sapiens GN=CAMK2G	High	Peak Found	High	Peak Found
FALSE	424	4	3	3	3	[Master Protein] Isoform 2 of Band 4.1-like protein 1 OS=Homo sapiens GN=EPB41L1	Not Found	High	Not Found	Not Found
FALSE	31	1	3	3	3	[Master Protein] SWISS-PROT P12763 (Bos taurus) Alpha-2-HS-glycoprotein precursor	High	Peak Found	High	Peak Found
FALSE	432	4	3	3	3	[Master Protein] Histidine--tRNA ligase, cytoplasmic OS=Homo sapiens GN=HARS PE=1 SV=2	Not Found	Not Found	Not Found	High
FALSE	623	2	3	3	3	[Master Protein] Cytospin-A OS=Homo sapiens GN=SPECC1L PE=1 SV=2	Peak Found	High	Not Found	Not Found
FALSE	32	1	3	3	3	[Master Protein] Four and a half LIM domains protein 2 OS=Homo sapiens GN=FHL2 PE=1 SV=3	Peak Found	High	High	Peak Found
FALSE	503	3	3	3	3	[Master Protein] Isoform 1 of Voltage-dependent anion-selective channel protein 2 OS=Homo sapiens GN=VDAC2	High	Peak Found	High	Peak Found
FALSE	346	2	3	3	3	[Master Protein] Trifunctional enzyme subunit alpha, mitochondrial OS=Homo sapiens GN=HADHA PE=1 SV=2	High	Peak Found	Not Found	Not Found
FALSE	571	1	3	3	3	[Master Protein] Inosine-5'-monophosphate dehydrogenase 2 OS=Homo sapiens GN=IMPDH2 PE=1 SV=2	High	Peak Found	Not Found	Not Found
FALSE	305	5	3	3	3	[Master Protein] Gelsolin OS=Homo sapiens GN=GSN PE=1 SV=1	High	High	Not Found	Not Found
FALSE	296	1	3	3	3	[Master Protein] Poly [ADP-ribose] polymerase 1 OS=Homo sapiens GN=PARP1 PE=1 SV=4	Peak Found	High	Not Found	High
FALSE	331	2	2	21	44	[Master Protein] Isoform 2 of Tropomyosin alpha-1 chain OS=Homo sapiens GN=TPM1	Peak Found	High	Peak Found	High
FALSE	624	1	2	15	31	[Master Protein] Tropomyosin alpha-3 chain OS=Homo sapiens GN=TPM3 PE=1 SV=2	Peak Found	High	Not Found	Not Found
FALSE	349	2	2	7	17	[Master Protein] Nuclease-sensitive element-binding protein 1 OS=Homo sapiens GN=YBX1 PE=1 SV=3	High	Not Found	Peak Found	High
FALSE	80	4	2	7	16	[Master Protein] Y-box-binding protein 3 OS=Homo sapiens GN=YBX3 PE=1 SV=4	High	Peak Found	Not Found	Not Found
FALSE	317	3	2	4	8	[Master Protein] ENSBTAP00000024146 (Bos taurus) similar to alpha-2-macroglobulin isoform 1	High	High	High	High
FALSE	24	1	2	4	4	[Master Protein] Guanine nucleotide-binding protein subunit beta-4 OS=Homo sapiens GN=GNB4 PE=1 SV=3	High	Peak Found	Not Found	Not Found
FALSE	351	8	2	3	7	[Master Protein] Insulin-like growth factor 2 mRNA-binding protein 3 OS=Homo sapiens GN=IGF2BP3 PE=1 SV=2	High	High	High	Not Found
FALSE	480	7	2	3	7	[Master Protein] Histone H2AX OS=Homo sapiens GN=H2AFX PE=1 SV=2	High	High	Not Found	Not Found
FALSE	329	6	2	3	6	[Master Protein] SWISS-PROT P35908 Tax_Id=9606 Gene_Symbol=KRT2 Keratin, type II cytoskeletal 2 epidermal	High	High	High	High
FALSE	272	1	2	3	5	[Master Protein] 40S ribosomal protein S27 OS=Homo sapiens GN=RPS27 PE=1 SV=3	Peak Found	High	High	High
FALSE	458	3	2	2	10	[Master Protein] Isoform 2 of 60S ribosomal protein L31 OS=Homo sapiens GN=RPL31	High	High	High	High
FALSE	228	1	2	2	7	[Master Protein] ENSBTAP00000033053 (Bos taurus) 15 kDa protein	High	High	High	High
FALSE	380	1	2	2	7	[Master Protein] Enhancer of rudimentary homolog OS=Homo sapiens GN=ERH PE=1 SV=1	High	High	Peak Found	High
FALSE	251	1	2	2	6	[Master Protein] 60S ribosomal protein L19 OS=Homo sapiens GN=RPL19 PE=1 SV=1	Peak Found	High	High	High
FALSE	393	1	2	2	6	[Master Protein] Signal recognition particle 14 kDa protein OS=Homo sapiens GN=SRP14 PE=1 SV=2	High	High	High	High
FALSE	517	7	2	2	5	[Master Protein] Serine/arginine-rich splicing factor 10 OS=Homo sapiens GN=SRSF10 PE=1 SV=1	High	High	High	High
FALSE	139	3	2	2	5	[Master Protein] Small kinetochore-associated protein OS=Homo sapiens GN=KNSTRN PE=1 SV=2	High	Not Found	High	Peak Found
FALSE	492	1	2	2	5	[Master Protein] 40S ribosomal protein S5 OS=Homo sapiens GN=RPS5 PE=1 SV=4	High	Peak Found	High	Peak Found
FALSE	59	2	2	2	5	[Master Protein] Importin subunit beta-1 OS=Homo sapiens GN=KPNB1 PE=1 SV=2	Peak Found	High	Peak Found	High
FALSE	180	1	2	2	5	[Master Protein] 60S ribosomal protein L35a OS=Homo sapiens GN=RPL35A PE=1 SV=2	High	High	High	High
FALSE	417	5	2	2	5	[Master Protein] Mitochondrial fission factor OS=Homo sapiens GN=MFF PE=1 SV=1	Not Found	High	Not Found	High
FALSE	153	1	2	2	5	[Master Protein] Small nuclear ribonucleoprotein Sm D1 OS=Homo sapiens GN=SNRPD1 PE=1 SV=1	High	High	High	High
FALSE	253	2	2	2	5	[Master Protein] Actin-related protein 2/3 complex subunit 5 OS=Homo sapiens GN=ARPC5 PE=1 SV=3	High	High	High	High
FALSE	574	1	2	2	4	[Master Protein] GTP-binding nuclear protein Ran OS=Homo sapiens GN=RAN PE=1 SV=3	Not Found	High	High	High
FALSE	445	1	2	2	4	[Master Protein] Serotransferrin OS=Homo sapiens GN=TF PE=1 SV=3	High	High	High	High
FALSE	105	1	2	2	4	[Master Protein] 60S ribosomal protein L37a OS=Homo sapiens GN=RPL37A PE=1 SV=2	Not Found	Not Found	High	High
FALSE	186	1	2	2	4	[Master Protein] 60S acidic ribosomal protein P1 OS=Homo sapiens GN=RPLP1 PE=1 SV=1	High	High	Peak Found	High
FALSE	183	4	2	2	4	[Master Protein] Ubiquitin-40S ribosomal protein S27a OS=Homo sapiens GN=RPS27A PE=1 SV=2	High	Peak Found	High	High
FALSE	456	1	2	2	4	[Master Protein] Dihydrolipoyllysine-residue acetyltransferase component of pyruvate dehydrogenase complex, mitochondrial OS=Homo sapiens GN=DLAT PE=1 SV=3	High	Peak Found	High	Peak Found
FALSE	341	2	2	2	4	[Master Protein] Translocon-associated protein subunit alpha OS=Homo sapiens GN=SSR1 PE=1 SV=3	High	Not Found	High	Not Found
FALSE	269	1	2	2	3	[Master Protein] 60S ribosomal protein L18a OS=Homo sapiens GN=RPL18A PE=1 SV=2	High	Peak Found	High	Not Found
FALSE	174	3	2	2	3	[Master Protein] Isoform ASF-2 of Serine/arginine-rich splicing factor 1 OS=Homo sapiens GN=SRSF1	High	Not Found	High	High
FALSE	354	1	2	2	3	[Master Protein] Interleukin enhancer-binding factor 2 OS=Homo sapiens GN=ILF2 PE=1 SV=2	High	Peak Found	Peak Found	High
FALSE	398	1	2	2	3	[Master Protein] Protein kinase C delta-binding protein OS=Homo sapiens GN=PRKCDBP PE=1 SV=3	High	Not Found	High	Not Found
FALSE	339	6	2	2	3	[Master Protein] Isoform 2 of Serine/threonine-protein phosphatase PP1-alpha catalytic subunit OS=Homo sapiens GN=PPP1CA	Peak Found	High	High	Peak Found
FALSE	422	1	2	2	3	[Master Protein] Stromal cell-derived factor 2 OS=Homo sapiens GN=SDF2 PE=1 SV=2	High	Not Found	High	Not Found
FALSE	407	2	2	2	3	[Master Protein] Activator of 90 kDa heat shock protein ATPase homolog 1 OS=Homo sapiens GN=AHSA1 PE=1 SV=1	High	Not Found	High	Not Found
FALSE	127	1	2	2	3	[Master Protein] Actin-related protein 2/3 complex subunit 5-like protein OS=Homo sapiens GN=ARPC5L PE=1 SV=1	Peak Found	High	Peak Found	High
FALSE	421	2	2	2	3	[Master Protein] Heterogeneous nuclear ribonucleoprotein L OS=Homo sapiens GN=HNRNPL PE=1 SV=2	High	Not Found	High	Peak Found
FALSE	392	1	2	2	3	[Master Protein] BRISC complex subunit Abro1 OS=Homo sapiens GN=FAM175B PE=1 SV=2	High	Not Found	High	Not Found
FALSE	254	1	2	2	3	[Master Protein] Ran GTPase-activating protein 1 OS=Homo sapiens GN=RANGAP1 PE=1 SV=1	Not Found	High	Peak Found	High
FALSE	192	1	2	2	3	[Master Protein] Ceruloplasmin OS=Homo sapiens GN=CP PE=1 SV=1	High	Peak Found	High	High
FALSE	142	1	2	2	3	[Master Protein] 60S ribosomal protein L34 OS=Homo sapiens GN=RPL34 PE=1 SV=3	Peak Found	High	Peak Found	High
FALSE	440	1	2	2	3	[Master Protein] 60S ribosomal protein L5 OS=Homo sapiens GN=RPL5 PE=1 SV=3	Peak Found	High	High	High
FALSE	373	1	2	2	3	[Master Protein] Bifunctional glutamate/proline--tRNA ligase OS=Homo sapiens GN=EPRS PE=1 SV=5	High	Not Found	High	Peak Found
FALSE	634	2	2	2	3	[Master Protein] Destrin OS=Homo sapiens GN=DSTN PE=1 SV=3	High	High	High	Not Found
FALSE	283	2	2	2	3	[Master Protein] Isoform 2 of Coatomer subunit alpha OS=Homo sapiens GN=COPA	High	Peak Found	High	Peak Found
FALSE	243	1	2	2	3	[Master Protein] Pre-mRNA-processing factor 19 OS=Homo sapiens GN=PRPF19 PE=1 SV=1	Peak Found	High	High	High
FALSE	87	1	2	2	3	[Master Protein] Actin-related protein 2/3 complex subunit 3 OS=Homo sapiens GN=ARPC3 PE=1 SV=3	High	High	Not Found	Not Found
FALSE	197	2	2	2	3	[Master Protein] Isoform 2 of Mitochondrial dicarboxylate carrier OS=Homo sapiens GN=SLC25A10	High	Peak Found	High	Peak Found
FALSE	660	2	2	2	3	[Master Protein] Phenylalanine--tRNA ligase alpha subunit OS=Homo sapiens GN=FARSA PE=1 SV=3	High	Not Found	High	Peak Found
FALSE	211	1	2	2	3	[Master Protein] Translocon-associated protein subunit delta OS=Homo sapiens GN=SSR4 PE=1 SV=1	High	Not Found	High	Not Found
FALSE	355	1	2	2	3	[Master Protein] Cytochrome b-c1 complex subunit 2, mitochondrial OS=Homo sapiens GN=UQCRC2 PE=1 SV=3	High	Not Found	High	Not Found
FALSE	420	1	2	2	2	[Master Protein] Dolichyl-diphosphooligosaccharide--protein glycosyltransferase subunit 1 OS=Homo sapiens GN=RPN1 PE=1 SV=1	High	Peak Found	Not Found	Not Found
FALSE	669	1	2	2	2	[Master Protein] Aldehyde dehydrogenase X, mitochondrial OS=Homo sapiens GN=ALDH1B1 PE=1 SV=3	High	Not Found	High	Not Found
FALSE	56	1	2	2	2	[Master Protein] Deoxynucleotidyltransferase terminal-interacting protein 1 OS=Homo sapiens GN=DNTTIP1 PE=1 SV=2	Not Found	Not Found	High	Not Found
FALSE	125	2	2	2	2	[Master Protein] Dihydrolipoyllysine-residue succinyltransferase component of 2-oxoglutarate dehydrogenase complex, mitochondrial OS=Homo sapiens GN=DLST PE=1 SV=4	Peak Found	High	Not Found	Not Found
FALSE	33	1	2	2	2	[Master Protein] Serine protease 56 OS=Homo sapiens GN=PRSS56 PE=1 SV=1	High	Not Found	High	Not Found
FALSE	130	3	2	2	2	[Master Protein] Isoform 3 of Replication protein A 32 kDa subunit OS=Homo sapiens GN=RPA2	Peak Found	High	Not Found	Not Found
FALSE	177	2	2	2	2	[Master Protein] Erlin-1 OS=Homo sapiens GN=ERLIN1 PE=1 SV=1	High	Peak Found	Not Found	Not Found
FALSE	508	2	2	2	2	[Master Protein] Aspartate--tRNA ligase, cytoplasmic OS=Homo sapiens GN=DARS PE=1 SV=2	High	Peak Found	High	Not Found
FALSE	507	4	2	2	2	[Master Protein] Low molecular weight phosphotyrosine protein phosphatase OS=Homo sapiens GN=ACP1 PE=1 SV=3	High	Not Found	High	Peak Found
FALSE	443	2	2	2	2	[Master Protein] Isoform 2 of Vesicle-associated membrane protein-associated protein A OS=Homo sapiens GN=VAPA	Peak Found	High	High	Peak Found
FALSE	170	4	2	2	2	[Master Protein] Transformer-2 protein homolog alpha OS=Homo sapiens GN=TRA2A PE=1 SV=1	Not Found	High	Peak Found	High
FALSE	258	2	2	2	2	[Master Protein] WD repeat and HMG-box DNA-binding protein 1 OS=Homo sapiens GN=WDHD1 PE=1 SV=1	High	Not Found	Not Found	Not Found
FALSE	448	2	2	2	2	[Master Protein] T-complex protein 1 subunit zeta OS=Homo sapiens GN=CCT6A PE=1 SV=3	High	Not Found	High	Peak Found
FALSE	491	3	2	2	2	[Master Protein] Pyruvate dehydrogenase E1 component subunit beta, mitochondrial OS=Homo sapiens GN=PDHB PE=1 SV=3	High	Peak Found	High	Peak Found
FALSE	30	3	2	2	2	[Master Protein] Zinc finger CCCH-type antiviral protein 1 OS=Homo sapiens GN=ZC3HAV1 PE=1 SV=3	High	Peak Found	High	Not Found
FALSE	556	2	2	2	2	[Master Protein] Thioredoxin OS=Homo sapiens GN=TXN PE=1 SV=3	Not Found	Not Found	Peak Found	High
FALSE	557	1	2	2	2	[Master Protein] Sjoegren syndrome nuclear autoantigen 1 OS=Homo sapiens GN=SSNA1 PE=1 SV=2	High	Not Found	Not Found	Not Found
FALSE	236	1	2	2	2	[Master Protein] Cleavage and polyadenylation specificity factor subunit 1 OS=Homo sapiens GN=CPSF1 PE=1 SV=2	Not Found	Not Found	High	Peak Found
FALSE	242	1	2	2	2	[Master Protein] Replication protein A 14 kDa subunit OS=Homo sapiens GN=RPA3 PE=1 SV=1	Peak Found	High	Not Found	Not Found
FALSE	563	3	2	2	2	[Master Protein] Isoform 3 of Cyclin-dependent kinase 2-interacting protein OS=Homo sapiens GN=CINP	Not Found	Not Found	Not Found	High
FALSE	8	2	2	2	2	[Master Protein] Isoform 2 of Protein LSM12 homolog OS=Homo sapiens GN=LSM12	High	Peak Found	Not Found	Not Found
FALSE	157	2	2	2	2	[Master Protein] DNA mismatch repair protein Msh2 OS=Homo sapiens GN=MSH2 PE=1 SV=1	High	Not Found	High	Not Found
FALSE	342	2	2	2	2	[Master Protein] Isoform 2 of Fructose-bisphosphate aldolase A OS=Homo sapiens GN=ALDOA	High	High	Not Found	Not Found
FALSE	244	2	2	2	2	[Master Protein] ATP-dependent 6-phosphofructokinase, platelet type OS=Homo sapiens GN=PFKP PE=1 SV=2	High	Peak Found	Not Found	Not Found
FALSE	259	1	2	2	2	[Master Protein] Gem-associated protein 4 OS=Homo sapiens GN=GEMIN4 PE=1 SV=2	High	Peak Found	Peak Found	High
FALSE	84	1	2	2	2	[Master Protein] 40S ribosomal protein S19 OS=Homo sapiens GN=RPS19 PE=1 SV=2	Not Found	Not Found	High	Peak Found
FALSE	252	2	2	2	2	[Master Protein] S-adenosylmethionine synthase isoform type-2 OS=Homo sapiens GN=MAT2A PE=1 SV=1	High	Not Found	High	Peak Found
FALSE	44	1	2	2	2	[Master Protein] 26S protease regulatory subunit 6A OS=Homo sapiens GN=PSMC3 PE=1 SV=3	High	Not Found	High	Not Found
FALSE	352	2	2	2	2	[Master Protein] Brain acid soluble protein 1 OS=Homo sapiens GN=BASP1 PE=1 SV=2	High	Peak Found	Peak Found	High
FALSE	564	2	2	2	2	[Master Protein] 60S ribosomal protein L36a OS=Homo sapiens GN=RPL36A PE=1 SV=2	High	Peak Found	High	Not Found
FALSE	635	5	2	2	2	[Master Protein] Isoform 3 of 60S ribosomal protein L28 OS=Homo sapiens GN=RPL28	Not Found	Not Found	High	Peak Found
FALSE	577	2	2	2	2	[Master Protein] Isoform 2 of DNA replication licensing factor MCM3 OS=Homo sapiens GN=MCM3	Not Found	Not Found	High	Peak Found
FALSE	146	1	2	2	2	[Master Protein] Stromal cell-derived factor 2-like protein 1 OS=Homo sapiens GN=SDF2L1 PE=1 SV=2	High	Not Found	Not Found	Not Found
FALSE	521	1	2	2	2	[Master Protein] F-box-like/WD repeat-containing protein TBL1XR1 OS=Homo sapiens GN=TBL1XR1 PE=1 SV=1	Not Found	Not Found	High	Not Found
FALSE	207	2	2	2	2	[Master Protein] Putative helicase MOV-10 OS=Homo sapiens GN=MOV10 PE=1 SV=2	High	Peak Found	High	Peak Found
FALSE	479	1	2	2	2	[Master Protein] Retrotransposon-derived protein PEG10 OS=Homo sapiens GN=PEG10 PE=1 SV=2	High	Not Found	High	Not Found
FALSE	117	1	2	2	2	[Master Protein] PHD finger-like domain-containing protein 5A OS=Homo sapiens GN=PHF5A PE=1 SV=1	High	Peak Found	Not Found	Not Found
FALSE	167	1	2	2	2	[Master Protein] Emerin OS=Homo sapiens GN=EMD PE=1 SV=1	High	Peak Found	High	Peak Found
FALSE	114	2	2	2	2	[Master Protein] Echinoderm microtubule-associated protein-like 4 OS=Homo sapiens GN=EML4 PE=1 SV=3	High	Not Found	High	Not Found
FALSE	640	6	2	2	2	[Master Protein] PDZ and LIM domain protein 7 OS=Homo sapiens GN=PDLIM7 PE=1 SV=1	Not Found	Not Found	Not Found	High
FALSE	641	1	2	2	2	[Master Protein] Cancer-related nucleoside-triphosphatase OS=Homo sapiens GN=NTPCR PE=1 SV=1	High	Not Found	Not Found	Not Found
FALSE	397	1	2	2	2	[Master Protein] Complement component 1 Q subcomponent-binding protein, mitochondrial OS=Homo sapiens GN=C1QBP PE=1 SV=1	High	Not Found	Not Found	Not Found
FALSE	537	2	2	2	2	[Master Protein] Programmed cell death protein 6 OS=Homo sapiens GN=PDCD6 PE=1 SV=1	Not Found	Not Found	High	Peak Found
FALSE	395	2	2	2	2	[Master Protein] Arginine--tRNA ligase, cytoplasmic OS=Homo sapiens GN=RARS PE=1 SV=2	Not Found	Not Found	High	Peak Found
FALSE	107	1	2	2	2	[Master Protein] Uncharacterized protein C7orf50 OS=Homo sapiens GN=C7orf50 PE=1 SV=1	High	Peak Found	Peak Found	High
FALSE	608	1	2	2	2	[Master Protein] Protein FAM195A OS=Homo sapiens GN=FAM195A PE=1 SV=2	High	Not Found	High	Not Found
FALSE	266	2	2	2	2	[Master Protein] Helicase-like transcription factor OS=Homo sapiens GN=HLTF PE=1 SV=2	High	Not Found	Not Found	Not Found
FALSE	295	2	2	2	2	[Master Protein] Rho guanine nucleotide exchange factor 18 OS=Homo sapiens GN=ARHGEF18 PE=1 SV=3	Not Found	Not Found	High	Not Found
FALSE	603	1	2	2	2	[Master Protein] Splicing factor 3B subunit 2 OS=Homo sapiens GN=SF3B2 PE=1 SV=2	High	Peak Found	High	Peak Found
FALSE	128	1	1	19	40	[Master Protein] Isoform 5 of Tropomyosin alpha-1 chain OS=Homo sapiens GN=TPM1	High	High	Not Found	Not Found
FALSE	70	4	1	18	67	[Master Protein] Tubulin beta-2A chain OS=Homo sapiens GN=TUBB2A PE=1 SV=1	High	Not Found	Not Found	Not Found
FALSE	581	3	1	15	217	[Master Protein] Actin, alpha cardiac muscle 1 OS=Homo sapiens GN=ACTC1 PE=1 SV=1	Peak Found	High	Peak Found	High
FALSE	431	3	1	14	205	[Master Protein] Actin, aortic smooth muscle OS=Homo sapiens GN=ACTA2 PE=1 SV=1	Not Found	Not Found	High	Not Found
FALSE	459	3	1	13	110	[Master Protein] Myosin regulatory light chain 12A OS=Homo sapiens GN=MYL12A PE=1 SV=2	Not Found	High	Not Found	Not Found
FALSE	215	3	1	13	107	[Master Protein] Myosin regulatory light chain 12B OS=Homo sapiens GN=MYL12B PE=1 SV=2	Not Found	Not Found	Not Found	Not Found
FALSE	88	4	1	13	57	[Master Protein] Tubulin beta-3 chain OS=Homo sapiens GN=TUBB3 PE=1 SV=2	High	Not Found	Not Found	Not Found
FALSE	246	4	1	6	9	[Master Protein] Isoform 2 of Heterogeneous nuclear ribonucleoprotein R OS=Homo sapiens GN=HNRNPR	High	High	Peak Found	High
FALSE	451	2	1	4	8	[Master Protein] Cofilin-2 OS=Homo sapiens GN=CFL2 PE=1 SV=1	Peak Found	High	High	Peak Found
FALSE	611	4	1	2	5	[Master Protein] 26S protease regulatory subunit 8 OS=Homo sapiens GN=PSMC5 PE=1 SV=1	Not Found	Not Found	High	Not Found
FALSE	387	6	1	2	4	[Master Protein] Heterogeneous nuclear ribonucleoprotein H3 OS=Homo sapiens GN=HNRNPH3 PE=1 SV=2	Peak Found	High	High	High
FALSE	530	1	1	2	4	[Master Protein] Eukaryotic initiation factor 4A-III OS=Homo sapiens GN=EIF4A3 PE=1 SV=4	Not Found	Not Found	Peak Found	High
FALSE	276	2	1	2	3	[Master Protein] Calcium-binding mitochondrial carrier protein Aralar1 OS=Homo sapiens GN=SLC25A12 PE=1 SV=2	High	Not Found	High	Not Found
FALSE	51	1	1	2	2	[Master Protein] 40S ribosomal protein S27-like OS=Homo sapiens GN=RPS27L PE=1 SV=3	Not Found	Not Found	High	Not Found
FALSE	585	9	1	2	2	[Master Protein] Fragile X mental retardation protein 1 OS=Homo sapiens GN=FMR1 PE=1 SV=1	Not Found	Not Found	Not Found	High
FALSE	135	2	1	2	2	[Master Protein] F-actin-capping protein subunit alpha-2 OS=Homo sapiens GN=CAPZA2 PE=1 SV=3	Peak Found	High	Not Found	Not Found
FALSE	655	1	1	2	2	[Master Protein] Fragile X mental retardation syndrome-related protein 2 OS=Homo sapiens GN=FXR2 PE=1 SV=2	Not Found	Not Found	Peak Found	High
FALSE	113	7	1	1	8	[Master Protein] Isoform 7 of Ninein OS=Homo sapiens GN=NIN	Not Found	High	Peak Found	High
FALSE	190	19	1	1	6	[Master Protein] Guanine nucleotide-binding protein G(s) subunit alpha isoforms XLas OS=Homo sapiens GN=GNAS PE=1 SV=2	High	High	High	Peak Found
FALSE	316	1	1	1	5	[Master Protein] ENSBTAP00000011227 (Bos taurus) 15 kDa protein	High	High	High	High
FALSE	582	1	1	1	4	[Master Protein] Unconventional myosin-XVB OS=Homo sapiens GN=MYO15B PE=1 SV=2	High	Not Found	High	Peak Found
FALSE	82	2	1	1	4	[Master Protein] Small nuclear ribonucleoprotein Sm D3 OS=Homo sapiens GN=SNRPD3 PE=1 SV=1	High	High	High	High
FALSE	676	1	1	1	4	[Master Protein] Ig kappa chain V-I region Roy OS=Homo sapiens PE=1 SV=1	High	High	High	High
FALSE	221	1	1	1	3	[Master Protein] Ig kappa chain V-I region Lay OS=Homo sapiens PE=1 SV=1	Peak Found	High	Peak Found	High
FALSE	95	3	1	1	3	[Master Protein] Isoform 3 of Twinfilin-1 OS=Homo sapiens GN=TWF1	High	High	Peak Found	High
FALSE	320	1	1	1	3	[Master Protein] 40S ribosomal protein S30 OS=Homo sapiens GN=FAU PE=1 SV=1	High	High	Not Found	Not Found
FALSE	144	3	1	1	3	[Master Protein] Isoform 2 of Actin-related protein 2/3 complex subunit 4 OS=Homo sapiens GN=ARPC4	High	Peak Found	High	High
FALSE	394	3	1	1	3	[Master Protein] KH domain-containing, RNA-binding, signal transduction-associated protein 1 OS=Homo sapiens GN=KHDRBS1 PE=1 SV=1	High	High	High	Peak Found
FALSE	155	2	1	1	3	[Master Protein] Small nuclear ribonucleoprotein Sm D2 OS=Homo sapiens GN=SNRPD2 PE=1 SV=1	High	High	Peak Found	High
FALSE	203	4	1	1	3	[Master Protein] Survival motor neuron protein OS=Homo sapiens GN=SMN1 PE=1 SV=1	Peak Found	High	Peak Found	High
FALSE	152	2	1	1	2	[Master Protein] Lactoylglutathione lyase OS=Homo sapiens GN=GLO1 PE=1 SV=4	Not Found	High	Not Found	High
FALSE	425	2	1	1	2	[Master Protein] cAMP-dependent protein kinase type II-alpha regulatory subunit OS=Homo sapiens GN=PRKAR2A PE=1 SV=2	High	Not Found	High	Not Found
FALSE	196	1	1	1	2	[Master Protein] Isoform 3 of GRAM domain-containing protein 3 OS=Homo sapiens GN=GRAMD3	High	Not Found	High	Not Found
FALSE	672	4	1	1	2	[Master Protein] Isoform 2 of Nucleoside diphosphate kinase A OS=Homo sapiens GN=NME1	High	High	Not Found	Not Found
FALSE	514	1	1	1	2	[Master Protein] Importin-7 OS=Homo sapiens GN=IPO7 PE=1 SV=1	High	Peak Found	Not Found	Not Found
FALSE	337	1	1	1	2	[Master Protein] Prohibitin OS=Homo sapiens GN=PHB PE=1 SV=1	High	Not Found	High	Not Found
FALSE	96	8	1	1	2	[Master Protein] Isoform 9 of Eukaryotic translation initiation factor 4 gamma 1 OS=Homo sapiens GN=EIF4G1	Not Found	Not Found	High	Peak Found
FALSE	475	4	1	1	2	[Master Protein] Acyl-CoA synthetase family member 4 OS=Homo sapiens GN=AASDH PE=1 SV=3	Not Found	Not Found	Not Found	Not Found
FALSE	509	1	1	1	2	[Master Protein] ATP synthase subunit O, mitochondrial OS=Homo sapiens GN=ATP5O PE=1 SV=1	High	Peak Found	Not Found	Not Found
FALSE	14	1	1	1	2	[Master Protein] Sideroflexin-3 OS=Homo sapiens GN=SFXN3 PE=1 SV=2	High	Not Found	High	Peak Found
FALSE	568	4	1	1	2	[Master Protein] Isoform 2 of PERQ amino acid-rich with GYF domain-containing protein 2 OS=Homo sapiens GN=GIGYF2	Not Found	Not Found	High	Not Found
FALSE	214	1	1	1	2	[Master Protein] Large neutral amino acids transporter small subunit 1 OS=Homo sapiens GN=SLC7A5 PE=1 SV=2	High	High	Not Found	Not Found
FALSE	224	4	1	1	2	[Master Protein] Isoform 2 of Eukaryotic translation initiation factor 5A-1 OS=Homo sapiens GN=EIF5A	High	Peak Found	High	Peak Found
FALSE	668	4	1	1	2	[Master Protein] MICOS complex subunit MIC60 OS=Homo sapiens GN=IMMT PE=1 SV=1	High	Not Found	High	Not Found
FALSE	2	1	1	1	2	[Master Protein] C-1-tetrahydrofolate synthase, cytoplasmic OS=Homo sapiens GN=MTHFD1 PE=1 SV=3	High	Peak Found	High	Not Found
FALSE	230	3	1	1	2	[Master Protein] Long-chain-fatty-acid--CoA ligase 3 OS=Homo sapiens GN=ACSL3 PE=1 SV=3	High	Not Found	High	Not Found
FALSE	628	2	1	1	2	[Master Protein] Monocarboxylate transporter 1 OS=Homo sapiens GN=SLC16A1 PE=1 SV=3	High	Not Found	High	Peak Found
FALSE	50	2	1	1	2	[Master Protein] Aldehyde dehydrogenase family 16 member A1 OS=Homo sapiens GN=ALDH16A1 PE=1 SV=2	High	Peak Found	High	Not Found
FALSE	358	1	1	1	2	[Master Protein] Junction plakoglobin OS=Homo sapiens GN=JUP PE=1 SV=3	High	Peak Found	High	Not Found
FALSE	359	2	1	1	2	[Master Protein] Isoform 2 of Multifunctional protein ADE2 OS=Homo sapiens GN=PAICS	High	High	Not Found	Not Found
FALSE	363	2	1	1	2	[Master Protein] RuvB-like 1 OS=Homo sapiens GN=RUVBL1 PE=1 SV=1	High	Not Found	High	Not Found
FALSE	367	3	1	1	2	[Master Protein] Eukaryotic translation initiation factor 2 subunit 3 OS=Homo sapiens GN=EIF2S3 PE=1 SV=3	High	Peak Found	High	Peak Found
FALSE	442	2	1	1	2	[Master Protein] Isoform 2 of Transketolase OS=Homo sapiens GN=TKT	High	Not Found	High	Not Found
FALSE	241	2	1	1	2	[Master Protein] Transient receptor potential cation channel subfamily M member 8 OS=Homo sapiens GN=TRPM8 PE=1 SV=2	High	Peak Found	High	Peak Found
FALSE	539	1	1	1	2	[Master Protein] DnaJ homolog subfamily A member 2 OS=Homo sapiens GN=DNAJA2 PE=1 SV=1	High	Not Found	High	Not Found
FALSE	495	2	1	1	2	[Master Protein] Isoform 2 of Gephyrin OS=Homo sapiens GN=GPHN	Not Found	Not Found	High	Not Found
FALSE	588	8	1	1	2	[Master Protein] Septin-9 OS=Homo sapiens GN=SEPT9 PE=1 SV=2	Peak Found	High	Peak Found	High
FALSE	520	1	1	1	2	[Master Protein] Ferritin heavy chain OS=Homo sapiens GN=FTH1 PE=1 SV=2	Not Found	Not Found	Peak Found	High
FALSE	560	2	1	1	2	[Master Protein] Pinin OS=Homo sapiens GN=PNN PE=1 SV=4	Peak Found	High	High	Peak Found
FALSE	275	2	1	1	2	[Master Protein] Protein FAM98A OS=Homo sapiens GN=FAM98A PE=1 SV=1	High	Peak Found	High	Peak Found
FALSE	18	4	1	1	1	[Master Protein] Liprin-beta-1 OS=Homo sapiens GN=PPFIBP1 PE=1 SV=2	Not Found	Not Found	Not Found	High
FALSE	17	2	1	1	1	[Master Protein] Isoform 2 of Medium-chain specific acyl-CoA dehydrogenase, mitochondrial OS=Homo sapiens GN=ACADM	High	Not Found	Not Found	Not Found
FALSE	583	2	1	1	1	[Master Protein] SWISS-PROT P00735 (Bos taurus) Prothrombin precursor (Fragment)	Not Found	Not Found	High	Peak Found
FALSE	25	1	1	1	1	[Master Protein] Mitochondrial ribosome-associated GTPase 2 OS=Homo sapiens GN=MTG2 PE=1 SV=1	High	Peak Found	Not Found	Not Found
FALSE	584	1	1	1	1	[Master Protein] Folate receptor alpha OS=Homo sapiens GN=FOLR1 PE=1 SV=3	High	Peak Found	Not Found	Not Found
FALSE	78	1	1	1	1	[Master Protein] Probable rRNA-processing protein EBP2 OS=Homo sapiens GN=EBNA1BP2 PE=1 SV=2	High	Not Found	Not Found	Not Found
FALSE	74	1	1	1	1	[Master Protein] Transitional endoplasmic reticulum ATPase OS=Homo sapiens GN=VCP PE=1 SV=4	Not Found	Not Found	High	Not Found
FALSE	5	2	1	1	1	[Master Protein] Isoform 2 of Dermcidin OS=Homo sapiens GN=DCD	Not Found	Not Found	Peak Found	High
FALSE	649	6	1	1	1	[Master Protein] Actin-binding LIM protein 1 OS=Homo sapiens GN=ABLIM1 PE=1 SV=3	Peak Found	High	Not Found	Not Found
FALSE	650	1	1	1	1	[Master Protein] 40S ribosomal protein S28 OS=Homo sapiens GN=RPS28 PE=1 SV=1	Not Found	Not Found	High	Not Found
FALSE	651	1	1	1	1	[Master Protein] Coiled-coil domain-containing protein 185 OS=Homo sapiens GN=CCDC185 PE=1 SV=2	Not Found	High	Not Found	Not Found
FALSE	11	2	1	1	1	[Master Protein] Isoform 2 of Reticulocalbin-2 OS=Homo sapiens GN=RCN2	Not Found	Not Found	Not Found	Not Found
FALSE	674	5	1	1	1	[Master Protein] Receptor-type tyrosine-protein phosphatase S OS=Homo sapiens GN=PTPRS PE=1 SV=3	Not Found	Not Found	Not Found	High
FALSE	573	6	1	1	1	[Master Protein] Isoform 2 of Histone-binding protein RBBP7 OS=Homo sapiens GN=RBBP7	Not Found	High	Not Found	Not Found
FALSE	656	1	1	1	1	[Master Protein] BRISC and BRCA1-A complex member 1 OS=Homo sapiens GN=BABAM1 PE=1 SV=1	High	Not Found	Not Found	Not Found
FALSE	580	1	1	1	1	[Master Protein] NADH dehydrogenase [ubiquinone] 1 alpha subcomplex subunit 9, mitochondrial OS=Homo sapiens GN=NDUFA9 PE=1 SV=2	High	Not Found	Not Found	Not Found
FALSE	613	3	1	1	1	[Master Protein] Protein enabled homolog OS=Homo sapiens GN=ENAH PE=1 SV=2	Not Found	Not Found	High	Not Found
FALSE	638	1	1	1	1	[Master Protein] E3 ubiquitin/ISG15 ligase TRIM25 OS=Homo sapiens GN=TRIM25 PE=1 SV=2	Not Found	Not Found	High	Peak Found
FALSE	586	1	1	1	1	[Master Protein] Eukaryotic translation initiation factor 2 subunit 2 OS=Homo sapiens GN=EIF2S2 PE=1 SV=2	High	Peak Found	Not Found	Not Found
FALSE	616	2	1	1	1	[Master Protein] SH3KBP1-binding protein 1 OS=Homo sapiens GN=SHKBP1 PE=1 SV=2	High	Not Found	Not Found	Not Found
FALSE	43	2	1	1	1	[Master Protein] Nuclear cap-binding protein subunit 2 OS=Homo sapiens GN=NCBP2 PE=1 SV=1	Not Found	Not Found	Not Found	Not Found
FALSE	41	3	1	1	1	[Master Protein] Isoform 2 of Eukaryotic translation initiation factor 4E OS=Homo sapiens GN=EIF4E	High	Peak Found	Not Found	Not Found
FALSE	605	1	1	1	1	[Master Protein] Caveolin-1 OS=Homo sapiens GN=CAV1 PE=1 SV=4	High	Not Found	Not Found	Not Found
FALSE	39	2	1	1	1	[Master Protein] RuvB-like 2 OS=Homo sapiens GN=RUVBL2 PE=1 SV=3	High	Peak Found	Not Found	Not Found
FALSE	666	1	1	1	1	[Master Protein] RNA-binding protein 3 OS=Homo sapiens GN=RBM3 PE=1 SV=1	High	Peak Found	Not Found	Not Found
FALSE	665	1	1	1	1	[Master Protein] Actin-like protein 8 OS=Homo sapiens GN=ACTL8 PE=1 SV=1	Not Found	Not Found	High	Not Found
FALSE	604	4	1	1	1	[Master Protein] Isoform 5 of Golgin subfamily A member 4 OS=Homo sapiens GN=GOLGA4	Not Found	Not Found	Not Found	High
FALSE	664	2	1	1	1	[Master Protein] Transformer-2 protein homolog beta OS=Homo sapiens GN=TRA2B PE=1 SV=1	Not Found	Not Found	Peak Found	High
FALSE	625	2	1	1	1	[Master Protein] Isoform 2 of WD repeat-containing protein 37 OS=Homo sapiens GN=WDR37	Not Found	High	Not Found	Not Found
FALSE	663	3	1	1	1	[Master Protein] Triosephosphate isomerase OS=Homo sapiens GN=TPI1 PE=1 SV=3	High	Peak Found	Not Found	Not Found
FALSE	599	1	1	1	1	[Master Protein] Eukaryotic translation initiation factor 3 subunit F OS=Homo sapiens GN=EIF3F PE=1 SV=1	High	Peak Found	Not Found	Not Found
FALSE	670	2	1	1	1	[Master Protein] TAR DNA-binding protein 43 OS=Homo sapiens GN=TARDBP PE=1 SV=1	Not Found	Not Found	Not Found	Not Found
FALSE	53	3	1	1	1	[Master Protein] WD repeat-containing protein 91 OS=Homo sapiens GN=WDR91 PE=1 SV=2	Not Found	Not Found	High	Not Found
FALSE	629	2	1	1	1	[Master Protein] ADP-ribosylation factor-like protein 1 OS=Homo sapiens GN=ARL1 PE=1 SV=1	High	Not Found	Not Found	Not Found
FALSE	55	2	1	1	1	[Master Protein] 60S ribosomal protein L39 OS=Homo sapiens GN=RPL39 PE=1 SV=2	Peak Found	High	Not Found	Not Found
FALSE	662	7	1	1	1	[Master Protein] Agrin OS=Homo sapiens GN=AGRN PE=1 SV=5	Not Found	Not Found	Not Found	Not Found
FALSE	661	1	1	1	1	[Master Protein] Nuclear pore complex protein Nup93 OS=Homo sapiens GN=NUP93 PE=1 SV=2	High	Not Found	Not Found	Not Found
FALSE	633	1	1	1	1	[Master Protein] Uncharacterized protein C11orf98 OS=Homo sapiens GN=C11orf98 PE=4 SV=1	High	Peak Found	Not Found	Not Found
FALSE	596	5	1	1	1	[Master Protein] Isoform 2 of Ribose-phosphate pyrophosphokinase 2 OS=Homo sapiens GN=PRPS2	High	Peak Found	Not Found	Not Found
FALSE	671	1	1	1	1	[Master Protein] 60S ribosomal protein L29 OS=Homo sapiens GN=RPL29 PE=1 SV=2	Not Found	Not Found	High	Peak Found
FALSE	28	3	1	1	1	[Master Protein] Isoform 3 of Mitotic checkpoint serine/threonine-protein kinase BUB1 beta OS=Homo sapiens GN=BUB1B	Not Found	High	Not Found	Not Found
FALSE	45	7	1	1	1	[Master Protein] Isoform 3 of Sodium/potassium-transporting ATPase subunit alpha-3 OS=Homo sapiens GN=ATP1A3	Not Found	Not Found	High	Peak Found
FALSE	591	1	1	1	1	[Master Protein] Transcription termination factor 2 OS=Homo sapiens GN=TTF2 PE=1 SV=2	High	Not Found	Not Found	Not Found
FALSE	590	2	1	1	1	[Master Protein] Isoform 2 of Utrophin OS=Homo sapiens GN=UTRN	Not Found	Not Found	Not Found	High
FALSE	673	1	1	1	1	[Master Protein] T-cell surface glycoprotein CD1b OS=Homo sapiens GN=CD1B PE=1 SV=1	High	Not Found	Not Found	Not Found
FALSE	4	1	1	1	1	[Master Protein] Succinyl-CoA ligase [ADP/GDP-forming] subunit alpha, mitochondrial OS=Homo sapiens GN=SUCLG1 PE=1 SV=4	Not Found	Not Found	High	Not Found
FALSE	27	2	1	1	1	[Master Protein] Isoform 2 of Cysteine-rich protein 2 OS=Homo sapiens GN=CRIP2	Not Found	High	Not Found	Not Found
FALSE	72	1	1	1	1	[Master Protein] Protein CASC3 OS=Homo sapiens GN=CASC3 PE=1 SV=2	High	Not Found	Not Found	Not Found
FALSE	26	1	1	1	1	[Master Protein] Putative inactive carbonic anhydrase 5B-like protein OS=Homo sapiens GN=CA5BP1 PE=5 SV=2	Not Found	Not Found	High	Not Found
FALSE	657	2	1	1	1	[Master Protein] Apolipoprotein B-100 OS=Homo sapiens GN=APOB PE=1 SV=2	Not Found	Not Found	High	Peak Found
FALSE	141	1	1	1	1	[Master Protein] Argininosuccinate synthase OS=Homo sapiens GN=ASS1 PE=1 SV=2	Not Found	Not Found	Not Found	Not Found
FALSE	81	4	1	1	1	[Master Protein] Isoform 3 of Scaffold attachment factor B1 OS=Homo sapiens GN=SAFB	Not Found	High	Not Found	Not Found
FALSE	378	2	1	1	1	[Master Protein] GDP-mannose 4,6 dehydratase OS=Homo sapiens GN=GMDS PE=1 SV=1	High	Peak Found	Not Found	Not Found
FALSE	227	2	1	1	1	[Master Protein] Prohibitin-2 OS=Homo sapiens GN=PHB2 PE=1 SV=2	Not Found	Not Found	High	Not Found
FALSE	386	2	1	1	1	[Master Protein] Transcription factor A, mitochondrial OS=Homo sapiens GN=TFAM PE=1 SV=1	High	Not Found	Not Found	Not Found
FALSE	389	1	1	1	1	[Master Protein] Aminoacyl tRNA synthase complex-interacting multifunctional protein 2 OS=Homo sapiens GN=AIMP2 PE=1 SV=2	High	Peak Found	Not Found	Not Found
FALSE	225	1	1	1	1	[Master Protein] Immunoglobulin lambda-like polypeptide 5 OS=Homo sapiens GN=IGLL5 PE=2 SV=2	Not Found	Not Found	High	Peak Found
FALSE	391	4	1	1	1	[Master Protein] Isoform 3 of L-lactate dehydrogenase A chain OS=Homo sapiens GN=LDHA	High	Not Found	Not Found	Not Found
FALSE	399	2	1	1	1	[Master Protein] Isoform 2 of Phosphoribosyl pyrophosphate synthase-associated protein 1 OS=Homo sapiens GN=PRPSAP1	Not Found	Not Found	Not Found	Not Found
FALSE	402	1	1	1	1	[Master Protein] Gamma-aminobutyric acid receptor subunit alpha-5 OS=Homo sapiens GN=GABRA5 PE=1 SV=1	Not Found	High	Not Found	Not Found
FALSE	219	1	1	1	1	[Master Protein] Exosome complex component RRP42 OS=Homo sapiens GN=EXOSC7 PE=1 SV=3	Not Found	Not Found	High	Not Found
FALSE	404	1	1	1	1	[Master Protein] Ig lambda-6 chain C region OS=Homo sapiens GN=IGLC6 PE=4 SV=1	High	Peak Found	Not Found	Not Found
FALSE	210	3	1	1	1	[Master Protein] Coatomer subunit epsilon OS=Homo sapiens GN=COPE PE=1 SV=3	High	Not Found	Not Found	Not Found
FALSE	206	4	1	1	1	[Master Protein] Isoform 4 of Heat shock protein 105 kDa OS=Homo sapiens GN=HSPH1	Not Found	Not Found	High	Peak Found
FALSE	199	1	1	1	1	[Master Protein] Signal recognition particle 9 kDa protein OS=Homo sapiens GN=SRP9 PE=1 SV=2	Peak Found	High	Not Found	Not Found
FALSE	198	2	1	1	1	[Master Protein] Transcription elongation factor B polypeptide 1 OS=Homo sapiens GN=TCEB1 PE=1 SV=1	High	Peak Found	Not Found	Not Found
FALSE	419	4	1	1	1	[Master Protein] Isoform 4 of UDP-galactose translocator OS=Homo sapiens GN=SLC35A2	Not Found	Not Found	High	Not Found
FALSE	194	3	1	1	1	[Master Protein] Serum paraoxonase/arylesterase 2 OS=Homo sapiens GN=PON2 PE=1 SV=3	Not Found	Not Found	High	Peak Found
FALSE	428	1	1	1	1	[Master Protein] Nuclear cap-binding protein subunit 1 OS=Homo sapiens GN=NCBP1 PE=1 SV=1	Not Found	Not Found	Not Found	Not Found
FALSE	429	2	1	1	1	[Master Protein] G2/mitotic-specific cyclin-B1 OS=Homo sapiens GN=CCNB1 PE=1 SV=1	Not Found	Not Found	Peak Found	High
FALSE	181	5	1	1	1	[Master Protein] Tumor protein D53 OS=Homo sapiens GN=TPD52L1 PE=1 SV=1	High	Peak Found	Not Found	Not Found
FALSE	178	3	1	1	1	[Master Protein] Cullin-3 OS=Homo sapiens GN=CUL3 PE=1 SV=2	Not Found	High	Not Found	Not Found
FALSE	447	2	1	1	1	[Master Protein] Splicing factor U2AF 65 kDa subunit OS=Homo sapiens GN=U2AF2 PE=1 SV=4	Peak Found	High	Not Found	Not Found
FALSE	377	1	1	1	1	[Master Protein] Coronin-1B OS=Homo sapiens GN=CORO1B PE=1 SV=1	Not Found	Not Found	High	Peak Found
FALSE	449	3	1	1	1	[Master Protein] RNA-binding protein 39 OS=Homo sapiens GN=RBM39 PE=1 SV=2	Not Found	Not Found	High	Peak Found
FALSE	233	1	1	1	1	[Master Protein] Cytoplasmic dynein 1 heavy chain 1 OS=Homo sapiens GN=DYNC1H1 PE=1 SV=5	Not Found	Not Found	Not Found	Not Found
FALSE	366	1	1	1	1	[Master Protein] FAS-associated factor 2 OS=Homo sapiens GN=FAF2 PE=1 SV=2	High	Not Found	Not Found	Not Found
FALSE	298	1	1	1	1	[Master Protein] Protein S100-A4 OS=Homo sapiens GN=S100A4 PE=1 SV=1	High	Peak Found	Not Found	Not Found
FALSE	289	1	1	1	1	[Master Protein] Leucine-rich PPR motif-containing protein, mitochondrial OS=Homo sapiens GN=LRPPRC PE=1 SV=3	High	Not Found	Not Found	Not Found
FALSE	287	2	1	1	1	[Master Protein] Isoform 2 of Phosphofurin acidic cluster sorting protein 1 OS=Homo sapiens GN=PACS1	Not Found	High	Not Found	Not Found
FALSE	312	1	1	1	1	[Master Protein] Coatomer subunit beta OS=Homo sapiens GN=COPB1 PE=1 SV=3	Not Found	Not Found	Not Found	Not Found
FALSE	284	2	1	1	1	[Master Protein] Ribosomal L1 domain-containing protein 1 OS=Homo sapiens GN=RSL1D1 PE=1 SV=3	Not Found	Not Found	Peak Found	High
FALSE	314	2	1	1	1	[Master Protein] Isoform 2 of ATP-binding cassette sub-family F member 2 OS=Homo sapiens GN=ABCF2	High	Not Found	Not Found	Not Found
FALSE	282	2	1	1	1	[Master Protein] Regulator of nonsense transcripts 1 OS=Homo sapiens GN=UPF1 PE=1 SV=2	High	Peak Found	Not Found	Not Found
FALSE	279	2	1	1	1	[Master Protein] Partner of Y14 and mago OS=Homo sapiens GN=PYM1 PE=1 SV=1	High	Peak Found	Not Found	Not Found
FALSE	321	3	1	1	1	[Master Protein] Isoform 2 of Myosin phosphatase Rho-interacting protein OS=Homo sapiens GN=MPRIP	Peak Found	High	Not Found	Not Found
FALSE	278	2	1	1	1	[Master Protein] Isocitrate dehydrogenase [NAD] subunit beta, mitochondrial OS=Homo sapiens GN=IDH3B PE=1 SV=2	Not Found	Not Found	High	Not Found
FALSE	277	3	1	1	1	[Master Protein] Isoform 3 of Protein SEC13 homolog OS=Homo sapiens GN=SEC13	High	Not Found	Not Found	Not Found
[truncated: 63 more rows]

## Sheet: Peptide Groups
Proteins
[truncated: 4,378 more rows]

## Sheet: PSMs
PSMs
[truncated: 7,847 more rows]
