# Supplementary material for: HMMR acts in the PLK1-dependent spindle positioning pathway and supports neural development
Source: eLife journal article supplement (doi:10.7554/elife.28672), 2017-10-10
Supplement: supp [file elife_poa_e28672_Figure_2_figure_supplement_1.pdf › elife_poa_e28672_Figure_2_figure_supplement_1.pdf]

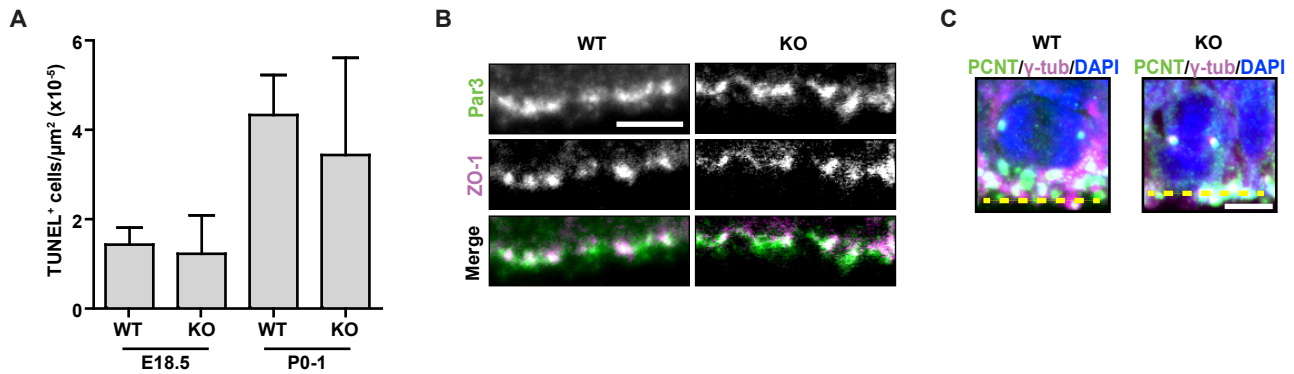

**Figure 2- figure supplement 1.** *Hmmlr<sup>tm1a/tm1a</sup>* mice do not display increased levels of apoptosis, defects in polarity, or centrosome amplification.

(**A**) Quantification of apoptosis (TUNEL staining) in the cortex of E18.5 and P0-1 wild-type (WT) and *Hmmlr<sup>tm1a/tm1a</sup>* (KO) mice. Data are represented as mean  $\pm$  SD (n= 4 (E18.5, WT); 6 (E18.5, KO); 3 (P0-1, WT); 5 (P0-1, KO)). (**B**) Polarity markers were normal in WT and KO E18.5 neural progenitors. Scale bar, 5  $\mu$ m. (**C**) Centrosome amplification was not observed in WT or KO E14.5 neural progenitors (Yellow dashed line indicates ventricle surface). Scale bar, 5  $\mu$ m.
