# Supplementary material for: HMMR acts in the PLK1-dependent spindle positioning pathway and supports neural development
Source: eLife journal article supplement (doi:10.7554/elife.28672), 2017-10-10
Supplement: supp [file elife_poa_e28672_Figure_3_figure_supplement_1.pdf › elife_poa_e28672_Figure_3_figure_supplement_1.pdf]

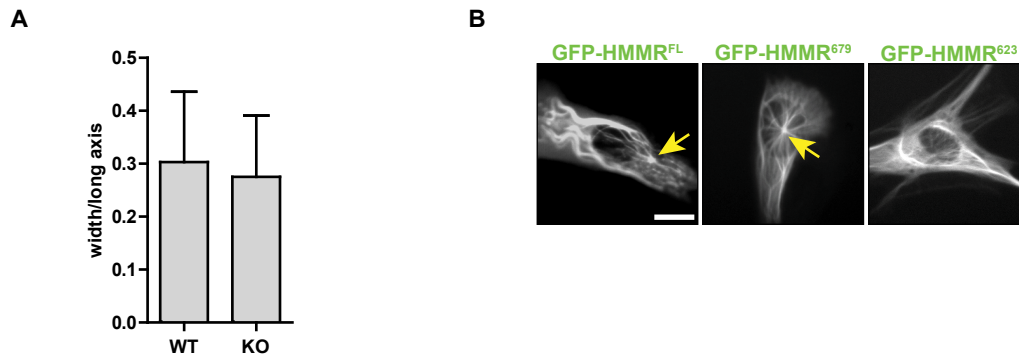

**Figure 3- figure supplement 1.** *Hmmr*<sup>tm1a/tm1a</sup> MEFs are similarly elongated to *Hmmr*<sup>+/+</sup> MEFs  
**(A)** Cell elongation is not significantly different in *Hmmr*<sup>tm1a/tm1a</sup> MEFs (KO) compared to *Hmmr*<sup>+/+</sup> MEFs (WT). Data are represented as mean ± SD (n= 56(WT); 61(KO)). **(B)** Localization of HMMR truncation constructs. Arrows point to the microtubule organizing center or centrosome. Scale bar, 10 μm.
