# Supplementary material for: HMMR acts in the PLK1-dependent spindle positioning pathway and supports neural development
Source: eLife journal article supplement (doi:10.7554/elife.28672), 2017-10-10
Supplement: supp [file elife_poa_e28672_Figure_4_figure_supplement_1.pdf › elife_poa_e28672_Figure_4_figure_supplement_1.pdf]

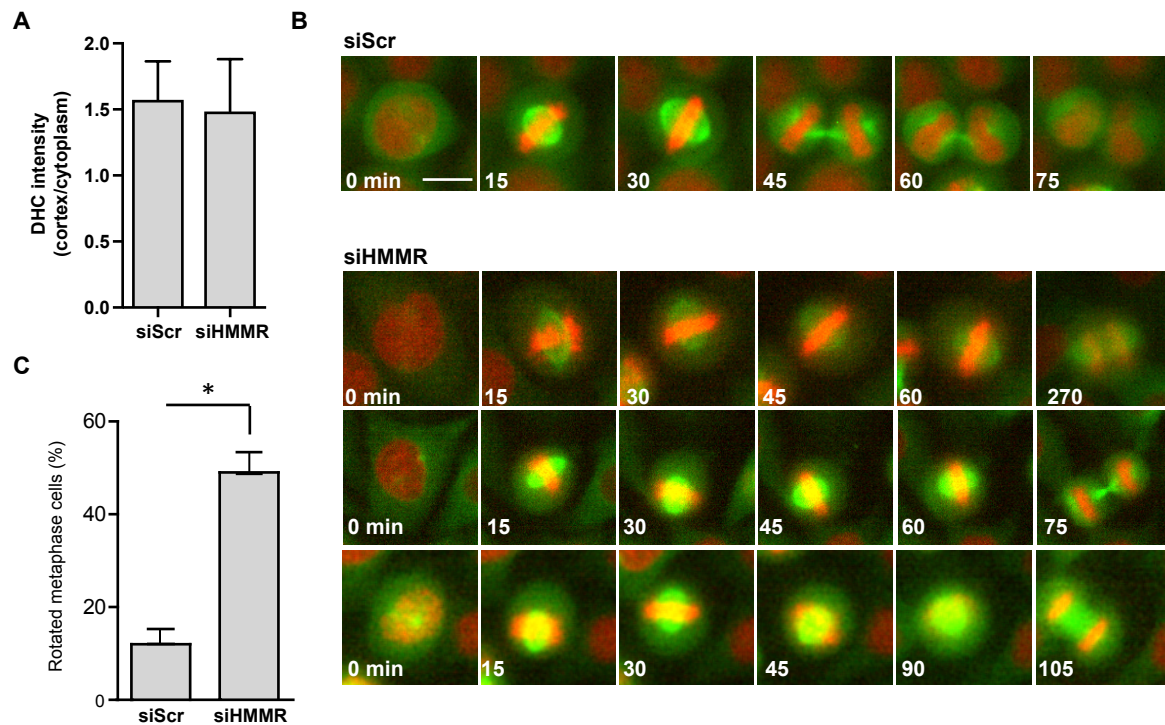

**Figure 4- figure supplement 1. HMMR regulates spindle movement.** (A) Dynein recruitment to cortical crescents in DHC-GFP HeLa cells treated with scrambled (siScr) and HMMR (siHMMR) siRNA. Data are represented as mean  $\pm$  SD (n= 25 (siScr), 20 (siHMMR)). (B) Mitotic spindle movement tracked by eGFP-TUBA stably expressed in HeLa cells treated with scrambled (siScr) or HMMR (siHMMR) siRNA using time-lapse imaging. Scale bar, 10  $\mu$ m. (C) Quantitation of spindle rotation in cells treated with siScr or siHMMR. ( $p < 0.05$ ; n= 145 (siScr), 145 (siHMMR) from 2 experiments).
