# Supplementary material for: HMMR acts in the PLK1-dependent spindle positioning pathway and supports neural development
Source: eLife journal article supplement (doi:10.7554/elife.28672), 2017-10-10
Supplement: supp [file elife_poa_e28672_Figure_6_figure_supplement_1.pdf › elife_poa_e28672_Figure_6_figure_supplement_1.pdf]

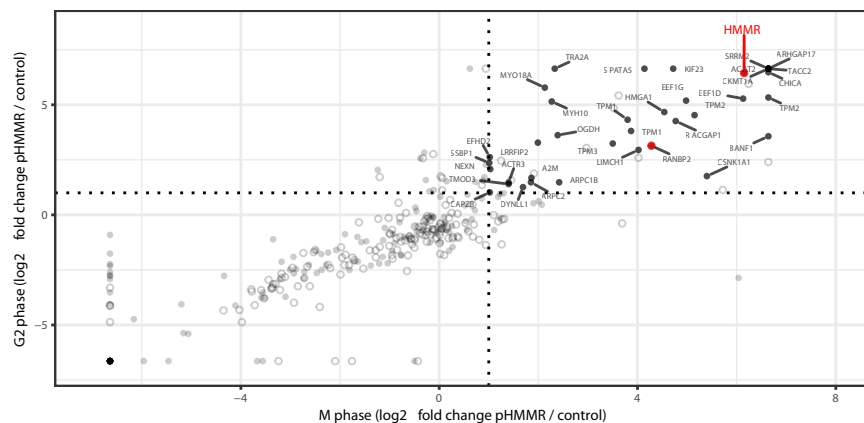

**Figure 6- figure supplement 1.** Total population of proteins complexed with pHMMR  
Mass spectrometry analysis of proteins co-precipitated from HeLa cell lysates with antibodies targeting HMMR phosphorylated at threonine 703 (pHMMR) including proteins co-precipitating with non-phosphorylated HMMR.
