# Supplementary material for: HMMR acts in the PLK1-dependent spindle positioning pathway and supports neural development
Source: eLife journal article supplement (doi:10.7554/elife.28672), 2017-10-10
Supplement: supp [file elife_poa_e28672_Figure_7_figure_supplement_1.pdf › elife_poa_e28672_Figure_7_figure_supplement_1.pdf]

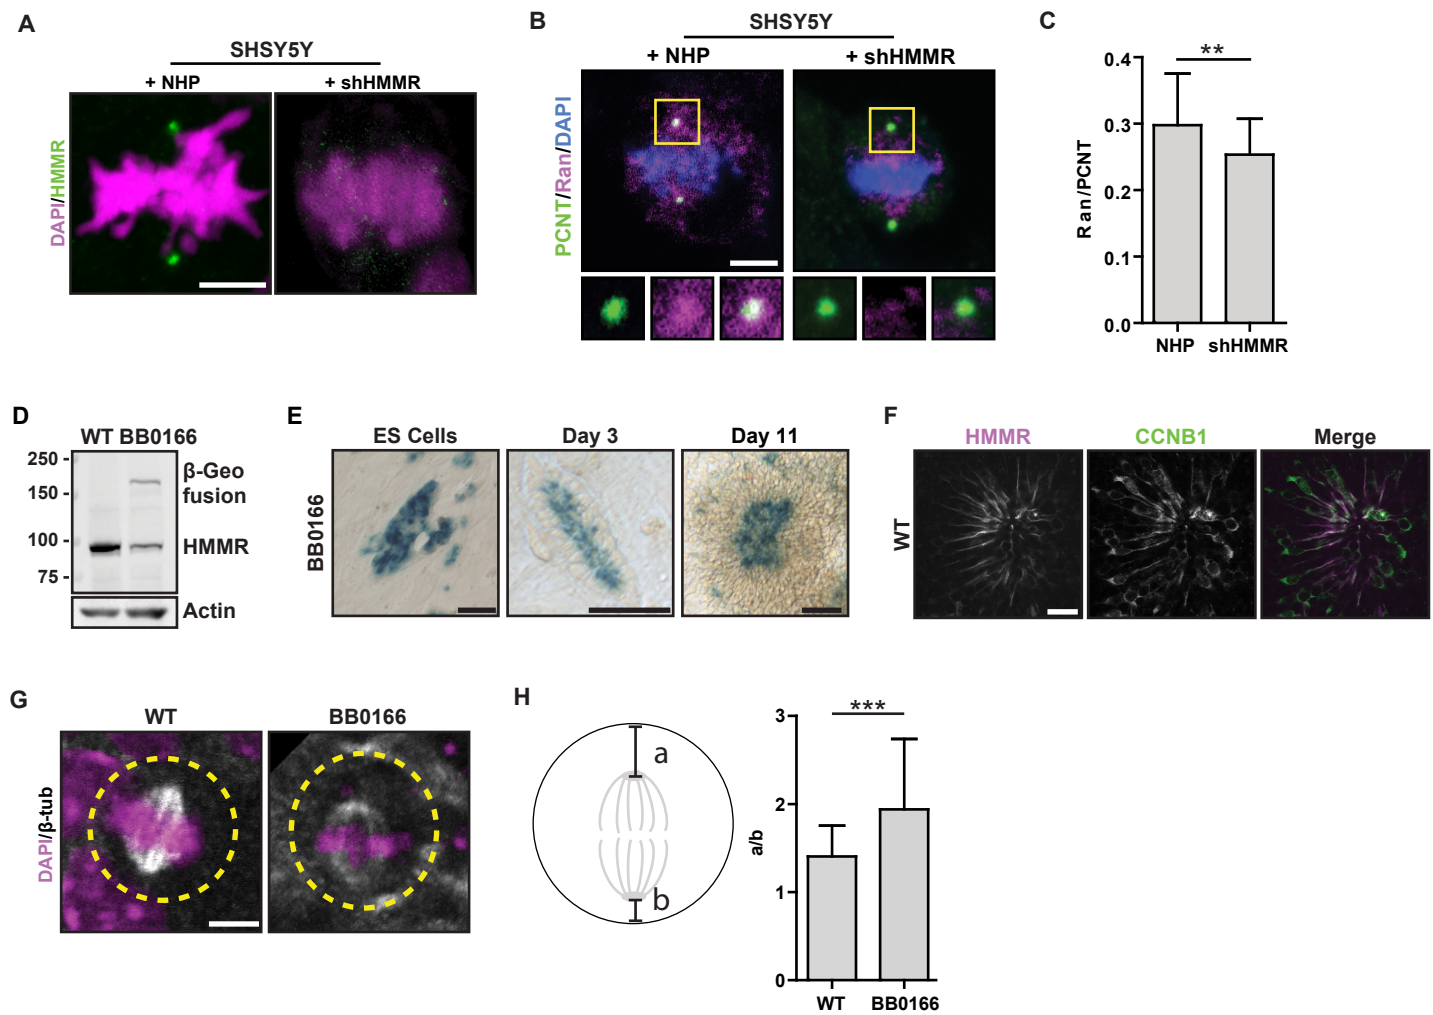

**Figure 7- figure supplement 1.** Centrosome localized HMMR localizes Ran and positions metaphase spindles in neural cells and rosettes derived from ES cells.

(A) Immunofluorescence detection of HMMR in SHSY5Y neuroblastoma cells treated with non-short hairpin (NHP) or HMMR shRNA (shHMMR). Scale bar, 5  $\mu$ m. (B) Localization of Ran in SHSY5Y neuroblastoma cells treated with NHP or shHMMR. Scale bar, 5  $\mu$ m. (C) Quantification of Ran localization in SHSY5Y cells. Data are represented as mean  $\pm$  SD (\*\*,  $p < 0.006$ ;  $n = 39$  (NHP), 35 (shHMMR)). (D) HMMR protein levels were reduced in *Hmmr*<sup>BB0166/+</sup> (BB0166) ES cells, which express a  $\beta$ -Geo fusion from one allele. E14Tg2 (WT) ES cells were used as the wild-type line. Actin was used as a loading control. (E) The *Hmmr* promoter was active, as indicated by  $\beta$ -Geo activity, in apical cells within rosettes. Scale bars, 50  $\mu$ m (ES cells and Day 3); 1 mm (Day 11). (F) HMMR-positive cells are Cyclin B1 (CCNB1)-positive in neural rosettes. Scale bar, 10  $\mu$ m. (G) Spindle position in WT and BB0166 neural rosettes. Dotted line indicates cell border. Scale bar, 5  $\mu$ m. (H) Quantification of spindle position in WT and BB0166 rosettes. Data are represented as mean  $\pm$  SD (\*\*\*,  $n = 31$  (WT); 23 (BB0166)).
