# Supplementary material for: HMMR acts in the PLK1-dependent spindle positioning pathway and supports neural development
Source: eLife journal article supplement (doi:10.7554/elife.28672), 2017-10-10
Supplement: supp [file elife_poa_e28672_Figure_7_figure_supplement_2.pdf › elife_poa_e28672_Figure_7_figure_supplement_2.pdf]

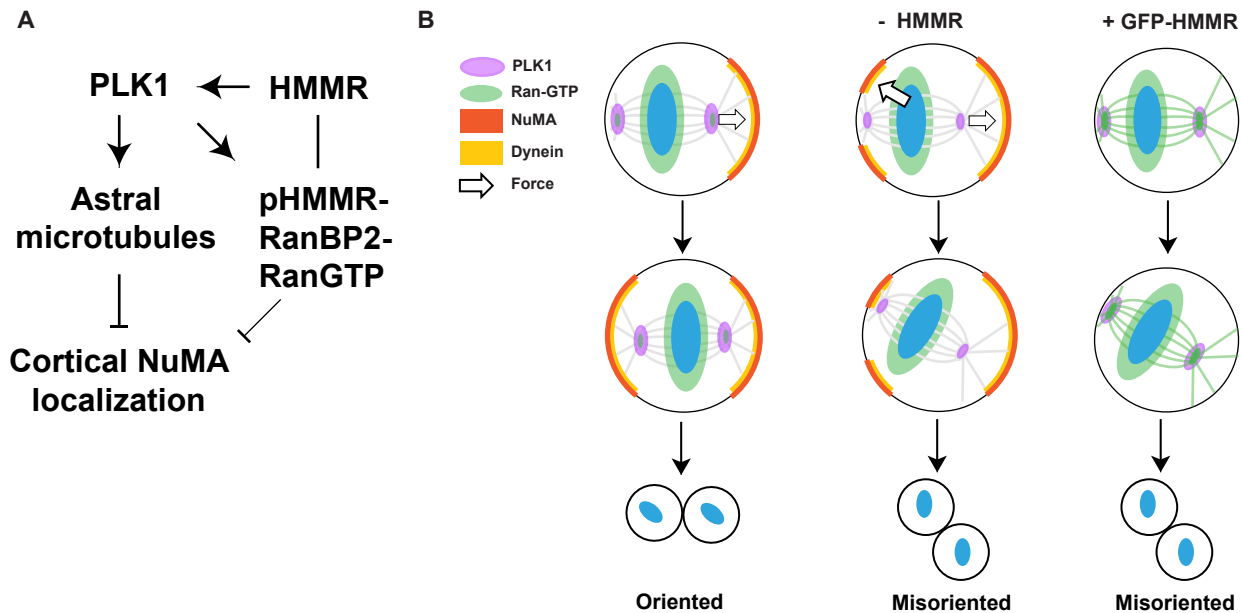

**Figure 7- figure supplement 2.** Model of HMMR regulation of spindle positioning via Ran regulation of NuMA-Dynein complexes.

**(A)** Proposed pathway through which PLK1/HMMR/Ran regulate cortical NuMA dynein. PLK1 activity controls astral microtubule density, which strips cortical NuMA localization. Silencing HMMR dampens PLK1, potentially through Aurora A. pHMMR, a proposed Aurora A and PLK1 substrate, locates RanBP2-RanGTP at spindle poles although the relative contribution to cortical NuMA localization remains unclear.

**(B)** Wild-type cells reposition mitotic spindles through force produced by asymmetric dynein motor localization. The asymmetric force is produced by stripping of cortical NuMA/Dynein by centrosomal PLK1/HMMR/Ran. Loss of HMMR (-HMMR) reduces the stripping effect regulated by the centrosome and leads to misoriented and mispositioned mitotic spindles. Overexpression of HMMR (+GFP-HMMR) strips NuMA completely from the cortex during metaphase. Mispositioned spindles are not able to correctly center.
