# Supplementary figures and images for: HMMR acts in the PLK1-dependent spindle positioning pathway and supports neural development
Source: eLife journal article supplement (doi:10.7554/elife.28672), 2017-10-10

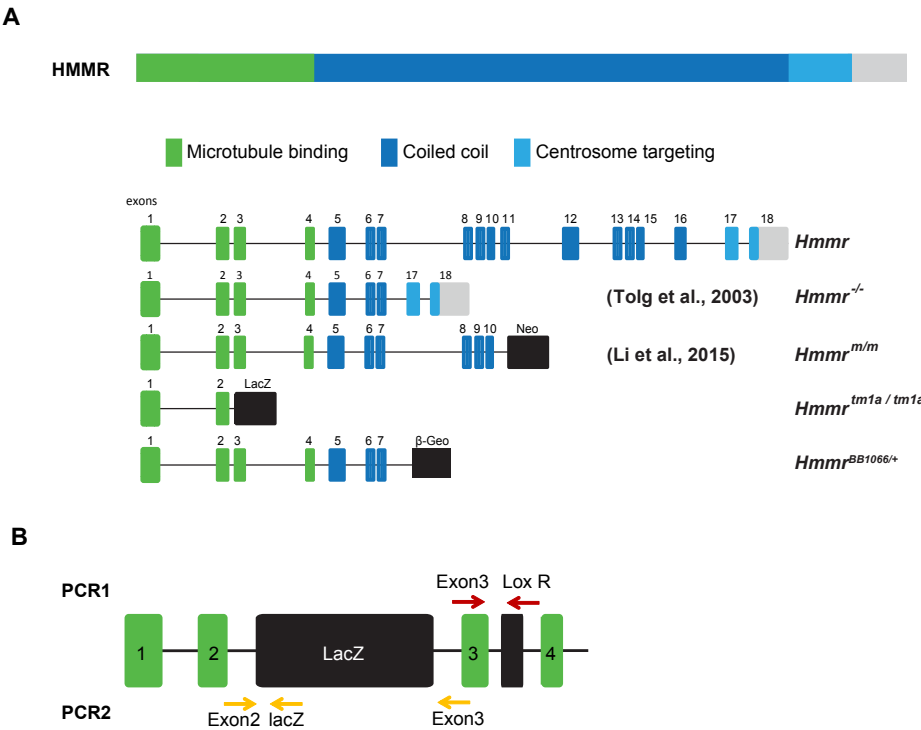

Supplement: supp [file elife_poa_e28672_Figure_1_figure_supplement_1.pdf › elife_poa_e28672_Figure_1_figure_supplement_1.pdf]
